# Supplementary material for: Theoretical insights into C–C bond formation through isonitrile insertion into a Cp*Ti complex
Source: Royal Society of Chemistry journal article supplement (doi:10.1039/c7ra05680j), 2017-01-01
Supplement: c7ra05680j1.pdf [file c7ra05680j1.pdf]

## Theoretical insights into the C-C bond formation through isonitrile insertion into Cp\*Ti complex

Ming-Ran Du,<sup>a,c</sup> Xiang-Biao Zhang,<sup>\*a</sup> Sheng-Meng Si,<sup>a,c</sup> Feng Yang<sup>a,c</sup> and Lei Wang<sup>\*b</sup>

<sup>a</sup>School of Chemical Engineering, Anhui University of Science and Technology, Huainan 232001, Anhui 235000, People's Republic of China. E-mail: [xbzhang\\_theochem@yahoo.com](mailto:xbzhang_theochem@yahoo.com) (X.B. Zhang.)

<sup>b</sup>Department of Chemistry, Huaibei Normal University, Huaibei, Anhui 235000, People's Republic of China. E-mail: [leiwang@chnu.edu.cn](mailto:leiwang@chnu.edu.cn) (L. Wang)

<sup>c</sup>These authors contributed equally.

| <b>Table of Contents</b>                                                                                                                              | <b>Pages</b> |
|-------------------------------------------------------------------------------------------------------------------------------------------------------|--------------|
| S1. Choice of calculation method                                                                                                                      | 2            |
| S2. <b>Scheme S1</b>                                                                                                                                  | 5            |
| S3. <b>Figure S1</b>                                                                                                                                  | 5            |
| S4. <b>Figure S2</b>                                                                                                                                  | 7            |
| S5. <b>Figure S3</b>                                                                                                                                  | 8            |
| S6. <b>Figure S4</b>                                                                                                                                  | 9            |
| S7. <b>Figure S5</b>                                                                                                                                  | 9            |
| S8. <b>Figure S6</b>                                                                                                                                  | 10           |
| S9. <b>Figure S7</b>                                                                                                                                  | 12           |
| S10. <b>Figure S8</b>                                                                                                                                 | 13           |
| S11. <b>Figure S9</b>                                                                                                                                 | 13           |
| S12. <b>Figure S10</b>                                                                                                                                | 14           |
| S13. <b>Figure S11</b>                                                                                                                                | 16           |
| S14. <b>Figure S12</b>                                                                                                                                | 19           |
| S15. <b>Scheme S2</b>                                                                                                                                 | 20           |
| S16. <b>Table S1</b>                                                                                                                                  | 20           |
| S17. <b>Table S2</b>                                                                                                                                  | 22           |
| S18. <b>Table S3</b>                                                                                                                                  | 23           |
| S19. <b>Table S4</b>                                                                                                                                  | 23           |
| S20. Calculated Cartesian coordinates and electronic energies (E) for relevant species in the calculation method and on the optimum reaction pathways | 25           |

## S1. Choice of calculation method

The geometrical structures of the enantiomers of titanaaziridine,  $10^{1-Ad}$  and  $10^{1-Ad}IS$ , were estimated by examining four theoretical models, B3LYP/BS1, B3LYP/def2-SVP, BP86/BS2, and BP86/LANL2DZ, and by comparing the calculated bond parameters to their X-ray crystal structures in order to predict the geometrical structures of the molecules accurately.<sup>1</sup> In BS1, the Ti and Cl atoms are described with the LANL2DZ basis sets improved with a set of f- or d-polarization function ( $\alpha = 1.506$  for Ti;  $\alpha = 0.640$  for Cl) with effective core potentials (ECPs),<sup>2-6</sup> while the other atoms are represented by the 6-311+G(d,p) basis sets, except for the atoms in the methyl and 1-adamantyl substituent groups, which are described with the 6-31G basis sets.<sup>7-9</sup> In BS2, the Ti atom is represented by the LANL2DZ basis set with ECP, Cl atom by the 6-311+G(d,p) basis set, and other atoms by the same basis sets as in BS1. These calculation methods have been applied to study titanium complexes and the complexes of the same group metals (Zr and Hf).<sup>10-18</sup> Moreover, the theoretical models, B3LYP/BS3 and B3LYP/BS4, were also examined. In BS3, the Cl atom is described with the 6-311+G(d,p) basis set instead of the improved LANL2DZ basis set used in BS1. Since Ti atom can be represented by a full basis set, the 6-311G basis set is adopted for the Ti atom in BS4 instead of the LANL2DZ basis set with ECP used in BS2. As shown in **Table 1**, the calculated results at the levels of B3LYP/BS1 and BP86/BS2 are closer to the experimental ones. However, BP86/BS2 is less accurate in predicting the Ti-N<sup>2</sup> bond length with the largest error of 0.031 Å. In addition, it is found that B3LYP/BS1 is much better than BP86/BS2 in predicting the Hf complex **16** (**Table 2**). For **16**, the Hf and Cl atoms are represented by the LANL2DZ basis sets improved with a set of f- or d-polarization function ( $\alpha = 0.784$  for Hf;  $\alpha = 0.640$  for Cl) with ECP in BS1,<sup>4</sup> while the other atoms are described with the 6-311+G(d,p) basis sets, except for the atoms in the methyl and 2,6-dimethylphenyl (Ar) substituent groups, which are described with the 6-31G basis sets. Further, in BS2, the Hf atom is described with the LANL2DZ basis sets with ECP, Cl atom with the 6-311+G(d,p) basis set, and other atoms with the same basis sets as in BS1. In order to compare with the on-going study of the reaction of Cp\*(Cl)Hf(diene) with isonitriles, the B3LYP/BS1 model is adopted in this work. All the calculations were performed in n-pentane with the G09 program, and the polarizable continuum model (PCM) using the integral equation formalism variant (IEFPCM) was adopted for the SCRF calculations.<sup>19</sup>

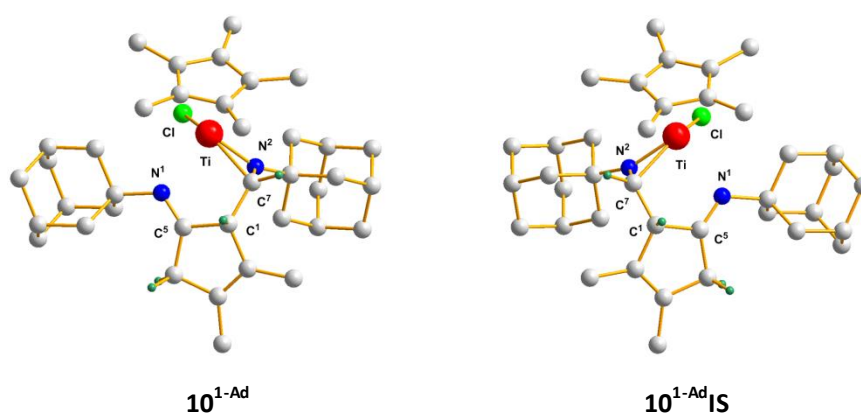

Atomic numbering for  $10^{1-Ad}$  and  $10^{1-Ad}IS$

(The H atoms on the methyl and 1-Ad groups were omitted for clarity.)

**Table 1.** Calculated main bond parameters and corresponding experimental values (bond length in Angstrom, angle and dihedral angle in Degree) for  $10^{1-Ad}$  and  $10^{1-Ad}IS$  (in parentheses)

| Methods           | Bond Parameters   |                   |                   |                  |                                |                                |                                |                                |                                   |                                                   |
|-------------------|-------------------|-------------------|-------------------|------------------|--------------------------------|--------------------------------|--------------------------------|--------------------------------|-----------------------------------|---------------------------------------------------|
|                   | Ti-N <sup>1</sup> | Ti-N <sup>2</sup> | Ti-C <sup>7</sup> | Ti-Cl            | C <sup>5</sup> -N <sup>1</sup> | C <sup>5</sup> -C <sup>1</sup> | C <sup>7</sup> -C <sup>1</sup> | C <sup>7</sup> -N <sup>2</sup> | Ti-N <sup>2</sup> -C <sup>7</sup> | Ti-N <sup>2</sup> -C <sup>7</sup> -C <sup>1</sup> |
| B3LYP/BS1         | 2.348<br>(2.348)  | 1.874<br>(1.874)  | 2.092<br>(2.092)  | 2.426<br>(2.426) | 1.285<br>(1.285)               | 1.513<br>(1.513)               | 1.530<br>(1.530)               | 1.396<br>(1.396)               | 78.1<br>(78.1)                    | 98.7<br>(-98.7)                                   |
| B3LYP/def2-SVP    | 2.355             | 1.877             | 2.099             | 2.413            | 1.288                          | 1.513                          | 1.530                          | 1.395                          | 78.3                              | 98.4                                              |
| BP86/BS2          | 2.341             | 1.893             | 2.110             | 2.415            | 1.298                          | 1.516                          | 1.537                          | 1.407                          | 78.0                              | 98.6                                              |
| BP86/LANL2DZ      | 2.292             | 1.881             | 2.112             | 2.465            | 1.318                          | 1.526                          | 1.554                          | 1.434                          | 77.9                              | 98.6                                              |
| B3LYP/BS3         | 2.349             | 1.875             | 2.091             | 2.433            | 1.285                          | 1.513                          | 1.530                          | 1.396                          | 78.0                              | 98.7                                              |
| B3LYP/BS4         | 2.360             | 1.890             | 2.106             | 2.430            | 1.286                          | 1.514                          | 1.531                          | 1.397                          | 78.1                              | 98.8                                              |
| Exp. <sup>1</sup> | 2.250<br>(2.273)  | 1.862<br>(1.881)  | 2.118<br>(2.118)  | 2.411<br>(2.412) | 1.302<br>(1.291)               | 1.475<br>(1.503)               | 1.506<br>(1.526)               | 1.406<br>(1.380)               | 79.4<br>(79.4)                    | 96.8<br>(-96.4)                                   |

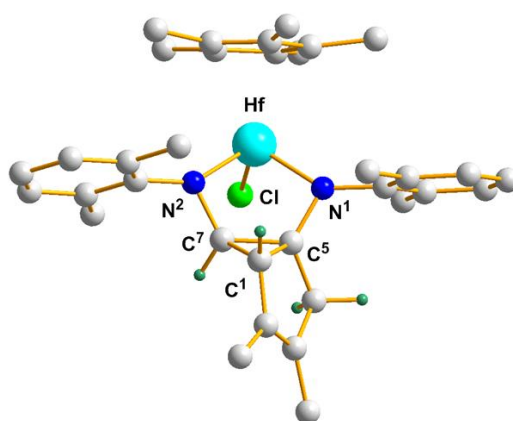

**16**

Atomic numbering for **16**

(The H atoms on the methyl and Ar groups were omitted for clarity.)

**Table 2.** Calculated main bond parameters and corresponding experimental values (bond length in Angstrom, angle and dihedral angle in Degree) for **16**

| Methods           | Bond Parameters   |                   |                   |                   |                                |                                |                                |                                |                                |                                   |
|-------------------|-------------------|-------------------|-------------------|-------------------|--------------------------------|--------------------------------|--------------------------------|--------------------------------|--------------------------------|-----------------------------------|
|                   | Hf-N <sup>1</sup> | Hf-N <sup>2</sup> | Hf-C <sup>5</sup> | Hf-C <sup>7</sup> | C <sup>5</sup> -N <sup>1</sup> | C <sup>7</sup> -N <sup>2</sup> | C <sup>7</sup> -C <sup>5</sup> | C <sup>5</sup> -C <sup>1</sup> | C <sup>7</sup> -C <sup>1</sup> | N <sup>1</sup> -Hf-N <sup>2</sup> |
| B3LYP/BS1         | 2.037             | 2.028             | 2.628             | 2.588             | 1.451                          | 1.449                          | 1.576                          | 1.525                          | 1.524                          | 93.5                              |
| BP86/BS2          | 2.052             | 2.045             | 2.622             | 2.583             | 1.454                          | 1.451                          | 1.594                          | 1.535                          | 1.535                          | 93.7                              |
| Exp. <sup>1</sup> | 2.010             | 1.991             | 2.527             | 2.490             | 1.423                          | 1.444                          | 1.552                          | 1.493                          | 1.507                          | 95.0                              |

## References

- 1 N. Valadez, J. R. Norton and M. C. Neary, *J. Am. Chem. Soc.*, 2015, **137**, 10152-10155.
- 2 P. J. Hay and W. R. Wadt, *J. Chem. Phys.*, 1985, **82**, 270-283.
- 3 W. R. Wadt and P. J. Hay, *J. Chem. Phys.*, 1985, **82**, 284-298.
- 4 A. W. Ehlers, M. Böhme, S. Dapprich, A. Gobbi, A. Höllwarth, V. Jonas, K. F. Köhler, R. Stegmann, A. Veldkamp and G. Frenking, *Chem. Phys. Lett.*, 1993, **208**, 111-114.

- 5 A. Höllwarth, M. Böhme, S. Dapprich, A. W. Ehlers, A. Gobbi, V. Jonas, K. F. Köhler, R. Stegmann, A. Veldkamp and G. Frenking, *Chem. Phys. Lett.*, 1993, **208**, 237-240.
- 6 P. J. Hay and W. R. Wadt, *J. Chem. Phys.*, 1985, **82**, 299-310.
- 7 W. J. Hehre, R. Ditchfield and J. A. Pople, *J. Chem. Phys.*, 1972, **56**, 2257-2261.
- 8 R. Krishnan, J. S. Binkley, R. Seeger and J. A. Pople, *J. Chem. Phys.*, 1972, **72**, 650-654.
- 9 V. A. Rassolov, M. A. Ratner, J. A. Pople, P. C. Redfern and L. A. Curtiss, *J. Comput. Chem.*, 2001, **22**, 976-984.
- 10 M. Haehnel, M. Ruhmann, O. Theilmann, S. Roy, T. Beweries, P. Arndt, A. Spannenberg, A. Villinger, E. D. Jemmis, A. Schulz and U. Rosenthal, *J. Am. Chem. Soc.*, 2012, **134**, 15979-15991.
- 11 Y.-D. Wu and Z.-X. Yu, *J. Am. Chem. Soc.*, 2001, **123**, 5777-5786.
- 12 S. Roy, U. Rosenthal and E. D. Jemmis, *Acc. Chem. Res.*, 2014, **47**, 2917-2930.
- 13 S. Niu and M. B. Hall, *Chem. Rev.*, 2000, **100**, 353-405.
- 14 B. Flemmig, P. Strauch and J. Reinhold, *Organometallics*, 2003, **22**, 1196-1202.
- 15 S. Roy, E. D. Jemmis, M. Ruhmann, A. Schulz, K. Kaleta, T. Beweries and U. Rosenthal, *Organometallics*, 2011, **30**, 2670-2679.
- 16 K. Kaleta, M. Ruhmann, O. Theilmann, T. Beweries, S. Roy, P. Arndt, A. Villinger, E. D. Jemmis, A. Schulz and U. Rosenthal, *J. Am. Chem. Soc.*, 2011, **133**, 5463-5473.
- 17 L. A. Watson, D. V. Yandulov and K. G. Caulton, *J. Am. Chem. Soc.*, 2001, **123**, 603-611.
- 18 E. Clot, C. Mégret, B. M. Kraft, O. Eisenstein and W. D. Jones, *J. Am. Chem. Soc.*, 2004, **126**, 5647-5653.
- 19 M. J. Frisch, G. W. Trucks, H. B. Schlegel, G. E. Scuseria, M. A. Robb, J. R. Cheeseman, G. Scalmani, V. Barone, B. Mennucci, G. A. Petersson, H. Nakatsuji, M. Caricato, X. Li, H. P. Hratchian, A. F. Izmaylov, J. Bloino, G. Zheng, J. L. Sonnenberg, M. Hada, M. Ehara, K. Toyota, R. Fukuda, J. Hasegawa, M. Ishida, T. Nakajima, Y. Honda, O. Kitao, H. Nakai, T. Vreven, J. A. Montgomery, Jr., J. E. Peralta, F. Ogliaro, M. Bearpark, J. J. Heyd, E. Brothers, K. N. Kudin, V. N. Staroverov, R. Kobayashi, J. Normand, K. Raghavachari, A. Rendell, J. C. Burant, S. S. Iyengar, J. Tomasi, M. Cossi, N. Rega, J. M. Millam, M. Klene, J. E. Knox, J. B. Cross, V. Bakken, C. Adamo, J. Jaramillo, R. Gomperts, R. E. Stratmann, O. Yazyev, A. J. Austin, R. Cammi, C. Pomelli, J. W. Ochterski, R. L. Martin, K. Morokuma, V. G. Zakrzewski, G. A. Voth, P. Salvador, J. J. Dannenberg, S. Dapprich, A. D. Daniels, O. Farkas, J. B. Foresman, J. V. Ortiz, J. Cioslowski and D. J. Fox, Gaussian 09 Revision A.02, Gaussian, Inc., Wallingford, CT 2009.



S2. **Scheme S1.** Summary of the calculated reaction pathways and results for (a) coordination of *t*BuNC to **M1a** and subsequent insertion into Ti-C bond, (b) coordination of *t*BuNC to **M3a** and subsequent insertion into Ti-C bond. Values denote Gibbs free energies in kcal mol<sup>-1</sup>. Solvent: n-pentane

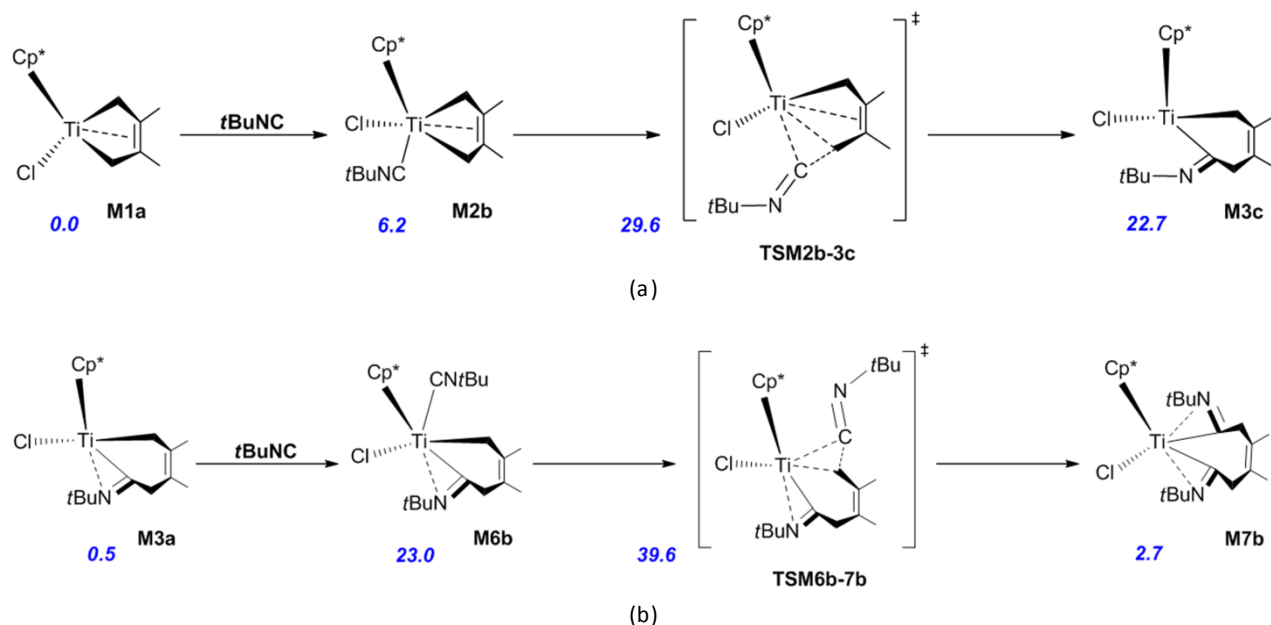

S3. **Figure S1.** Optimised structures (the methyl groups and the H atoms except for that involved in reaction were omitted for clarity, distances and angles are given in Å and degree, respectively; in n-pentane)

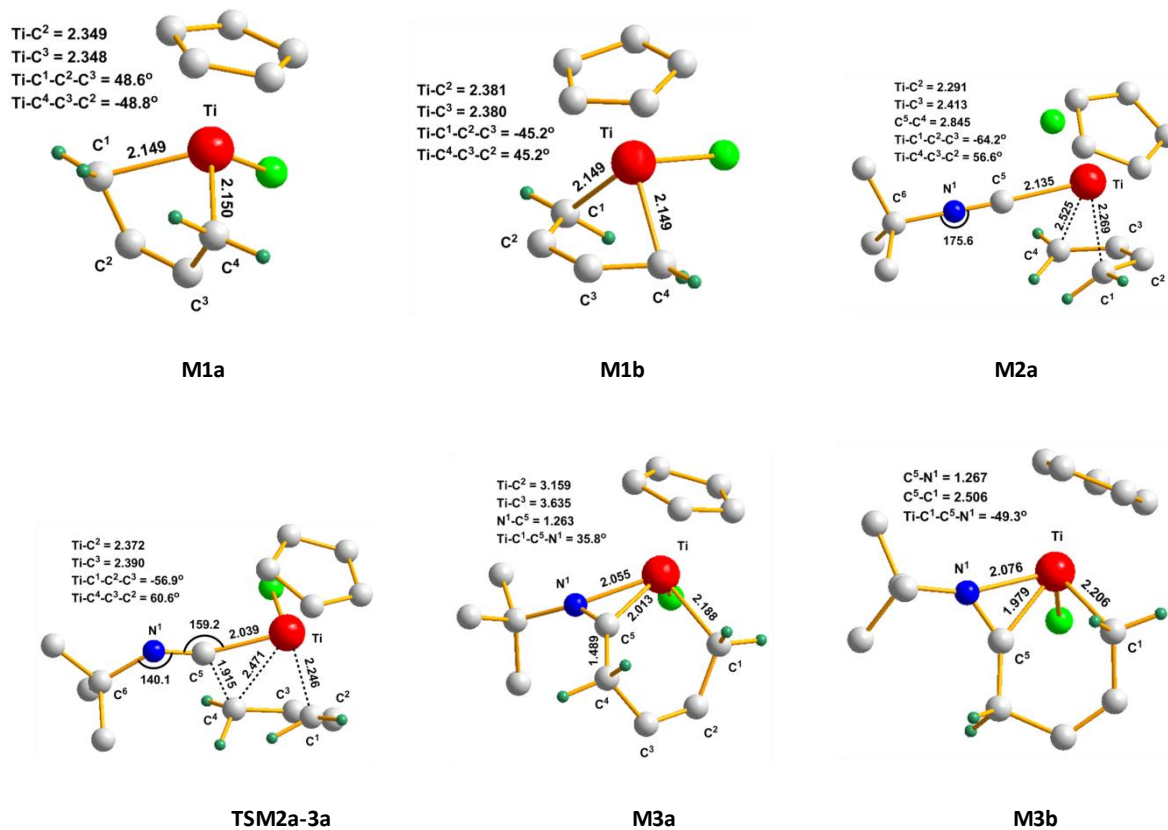

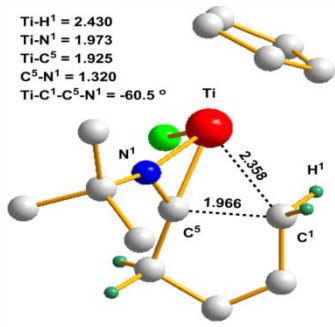

TSM3b-4

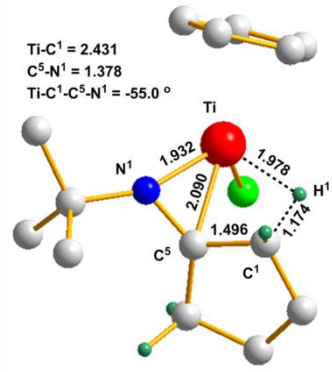

M4

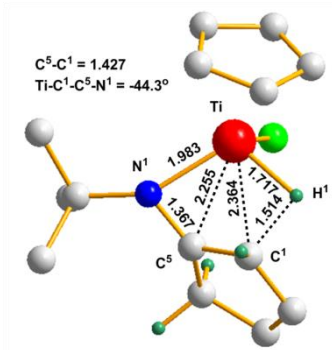

TSM4-5

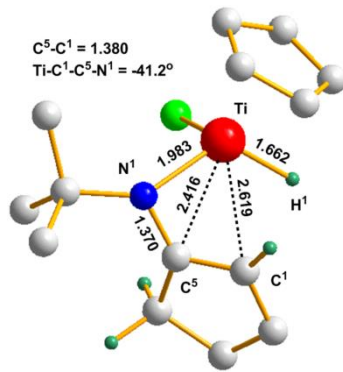

M5

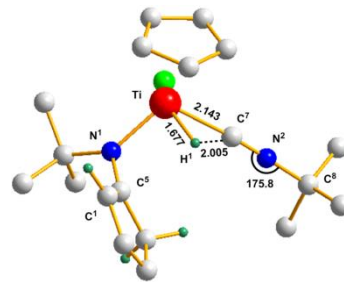

M6a

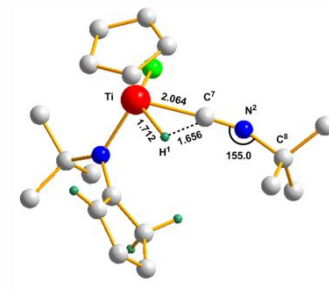

TSM6a-7a

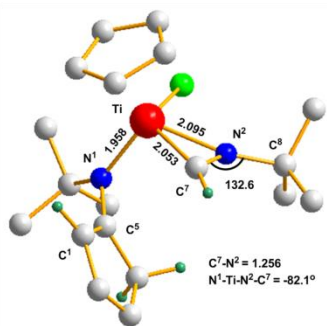

M8a

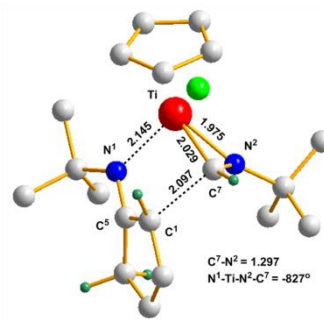

TSM8a-9a

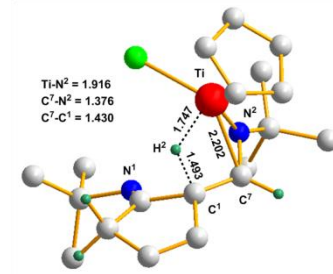

TSM10-11

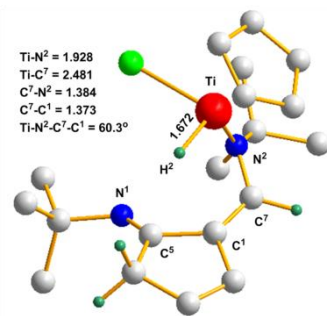

M11

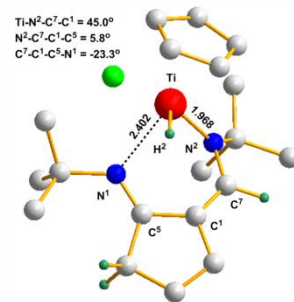

TSM11-19

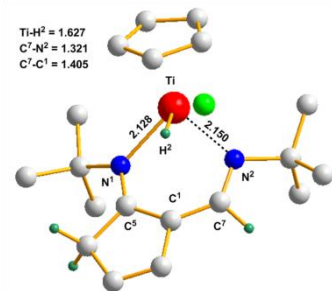

M19

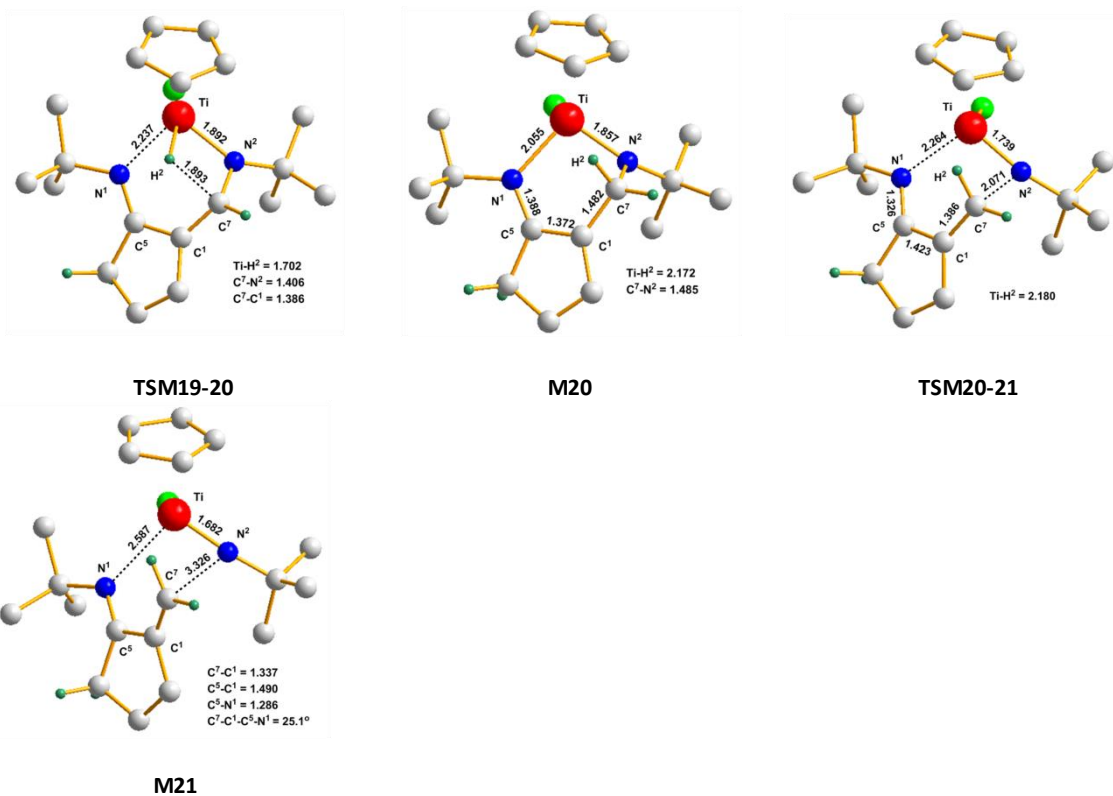

S4. **Figure S2.** Energetic profiles for the fragmentation of the titanaaziridine **M9a** (a) involving four-membered titanacycles, and (b) for breaking the Ti-C bond in **M9a**, and  $\gamma$ -H elimination in **M23**. The Gibbs free energies are given in kcal mol<sup>-1</sup>. Blue italics: reaction in n-pentane, black: reaction in benzene.

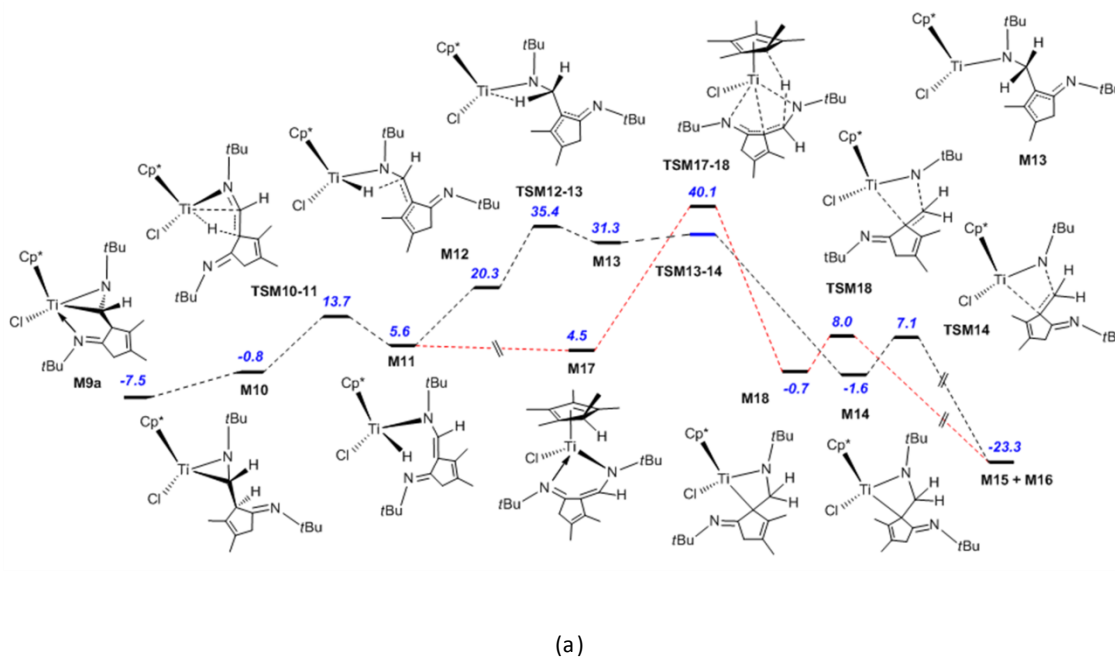

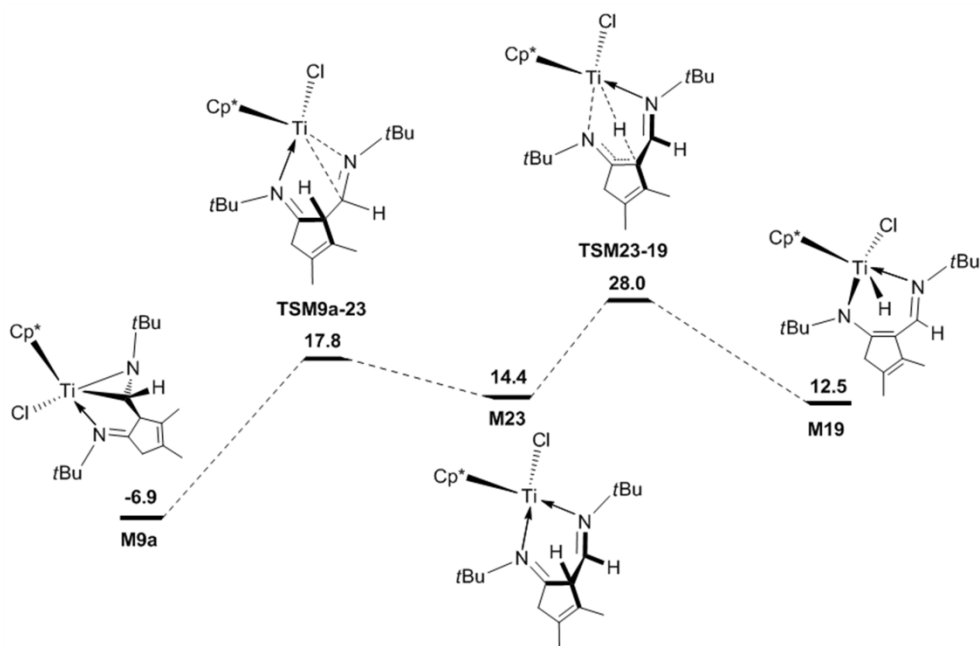

(b)

S5. **Figure S3.** Energetic profile for the formation of the titanaaziridine **10<sup>Me</sup>**. The Gibbs free energies are given in kcal mol<sup>-1</sup> and the above values include the dispersion correction. Solvent: benzene

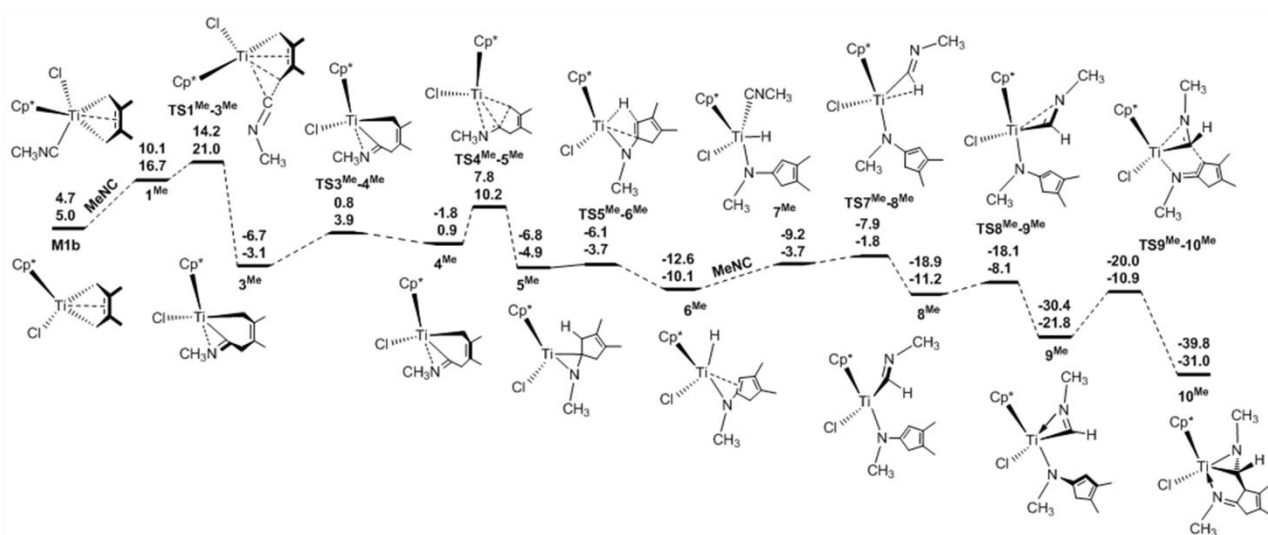

S6. **Figure S4.** Energetic profiles for the fragmentation of the titanaaziridine **10<sup>Me</sup>** via the  $\beta$ -H elimination and the  $\gamma$ -H elimination reaction pathways. The Gibbs free energies are given in kcal mol<sup>-1</sup> and the above values include the dispersion correction. Solvent: benzene

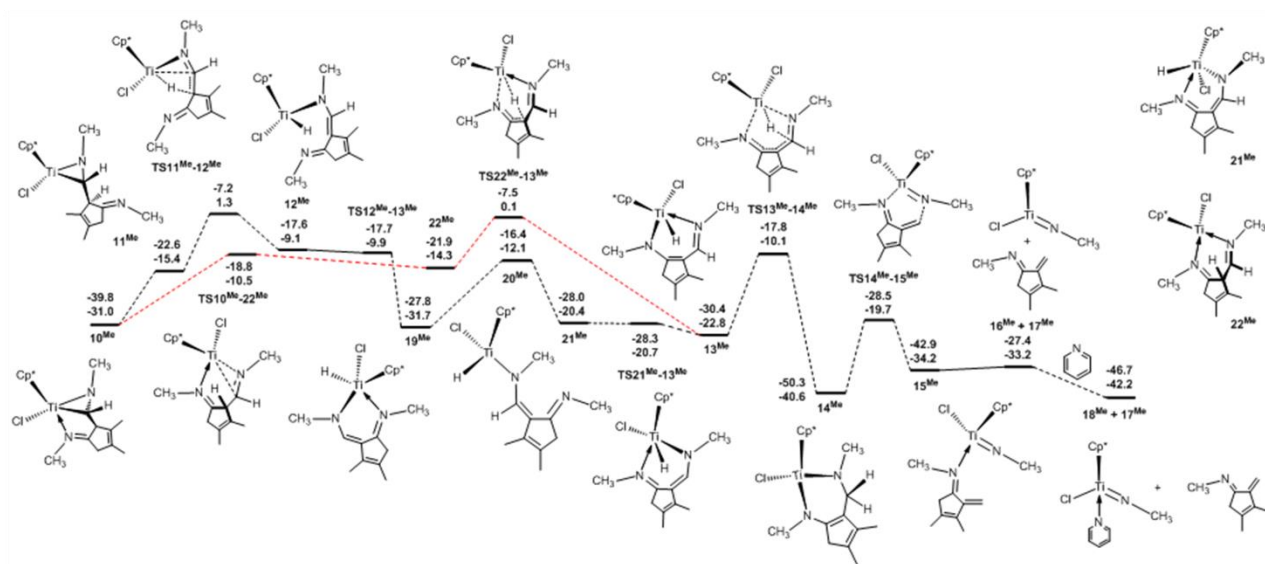

S7. **Figure S5.** Energetic profiles for the formation of the diazatitanacyclopentane **25<sup>Me</sup>** (a) via the insertion and the C-C coupling reaction pathways, and (b) via the isomerisation reaction pathway. The Gibbs free energies are given in kcal mol<sup>-1</sup> and the above values include the dispersion correction. Solvent: benzene

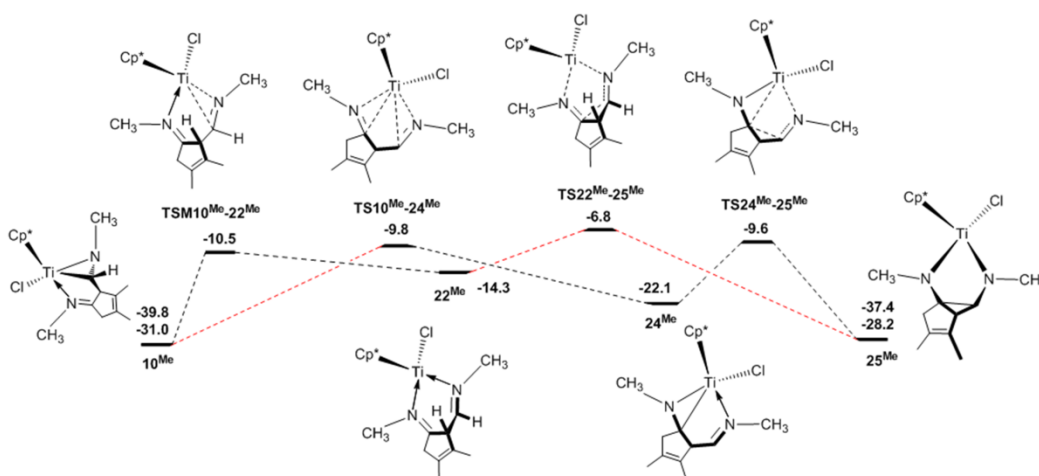

(a)

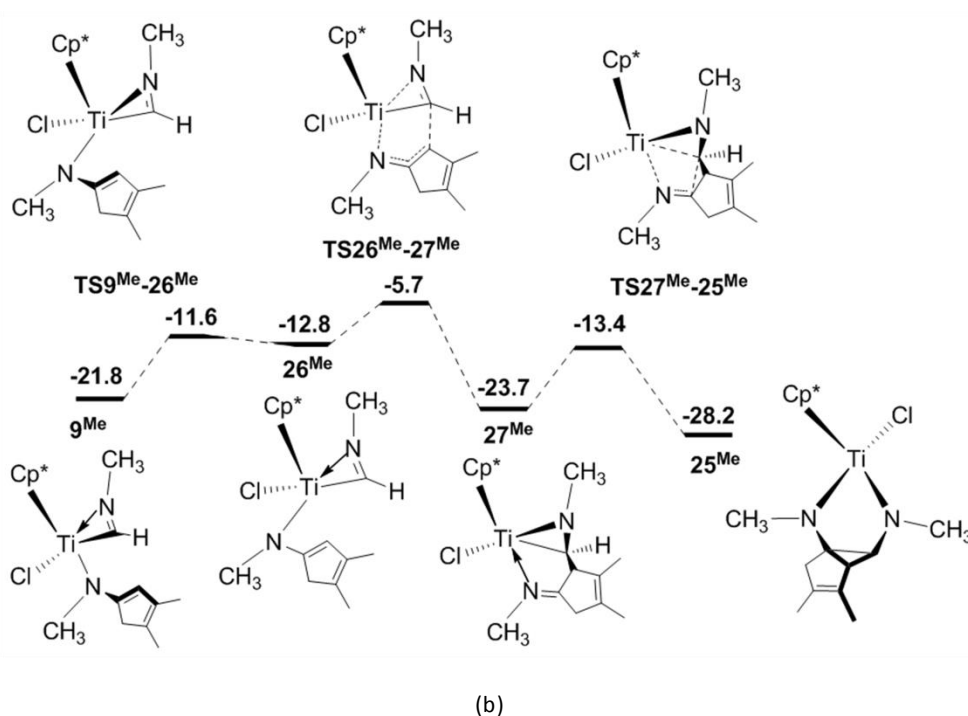

S8. **Figure S6.** Energy profiles for (a) migratory insertion of an Et-substituted isonitrile (EtNC) into the Ti–C bond in Ti complex **1<sup>Et</sup>**. (b) C–C reductive elimination in Ti complex **4<sup>Et</sup>**. (c) Fragmentation of titanaaziridine **10<sup>Et</sup>**. Formation of diazatitanacyclopentane **25<sup>Et</sup>** via (d) via the insertion and the C–C coupling reaction pathways, and (e) via the isomerisation reaction pathway. The Gibbs free energies are given in kcal mol<sup>-1</sup> and the above values include the dispersion correction. Solvent: benzene

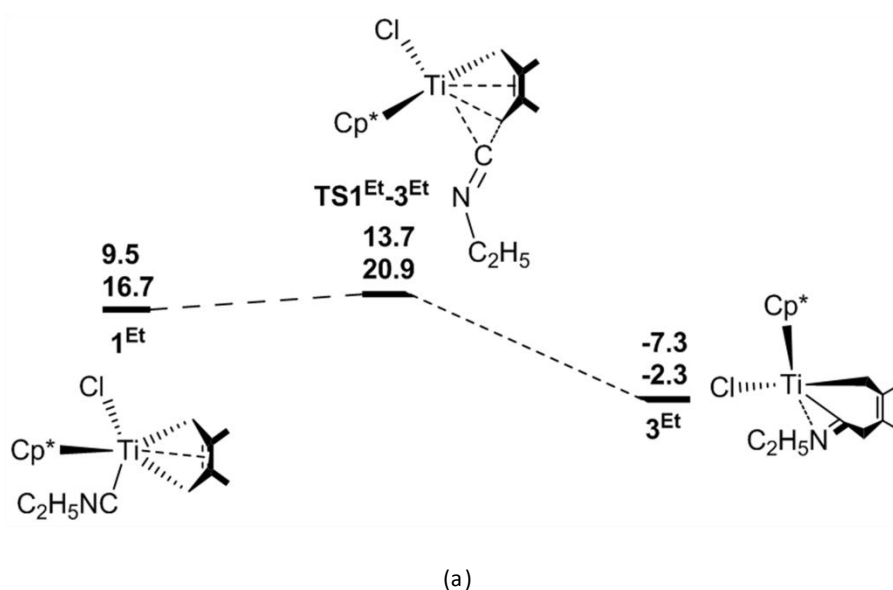

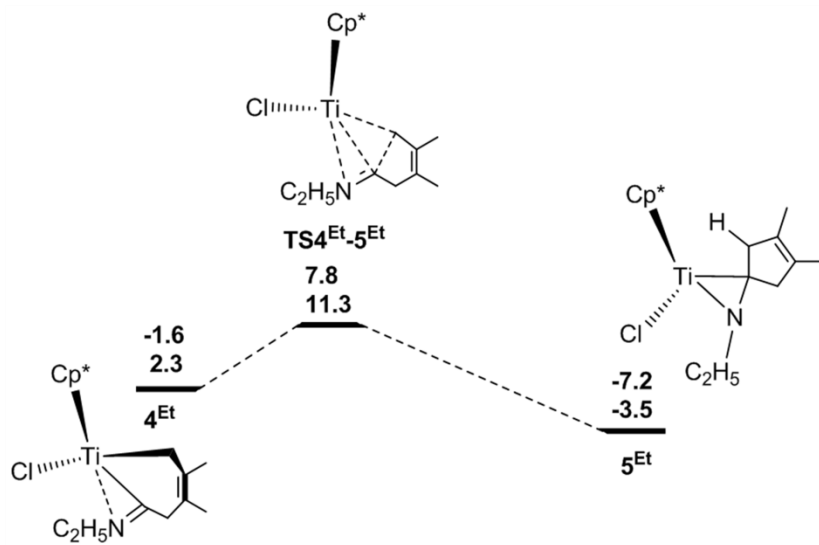

(b)

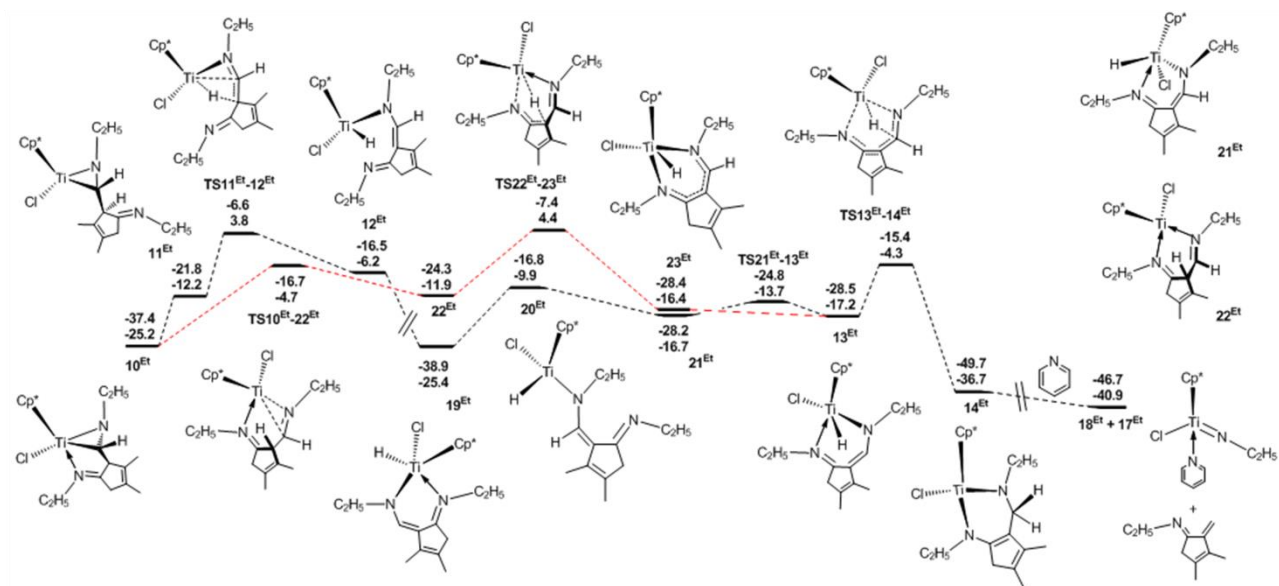

(c)

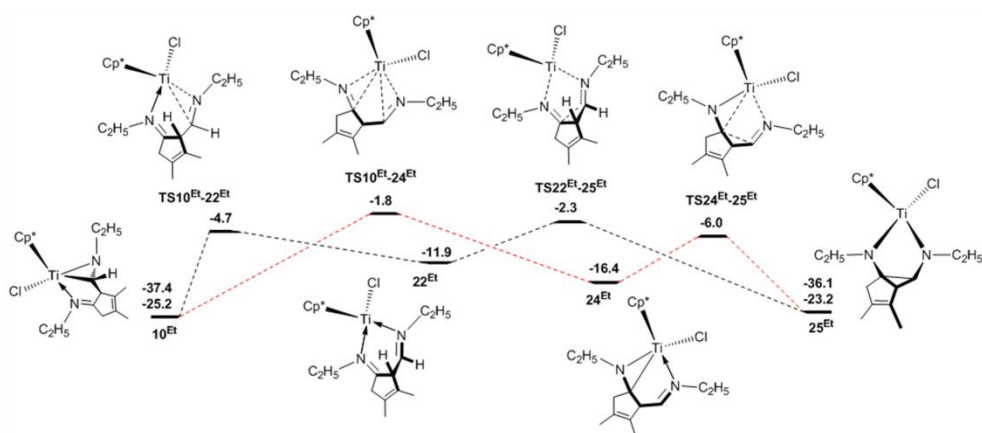

(d)

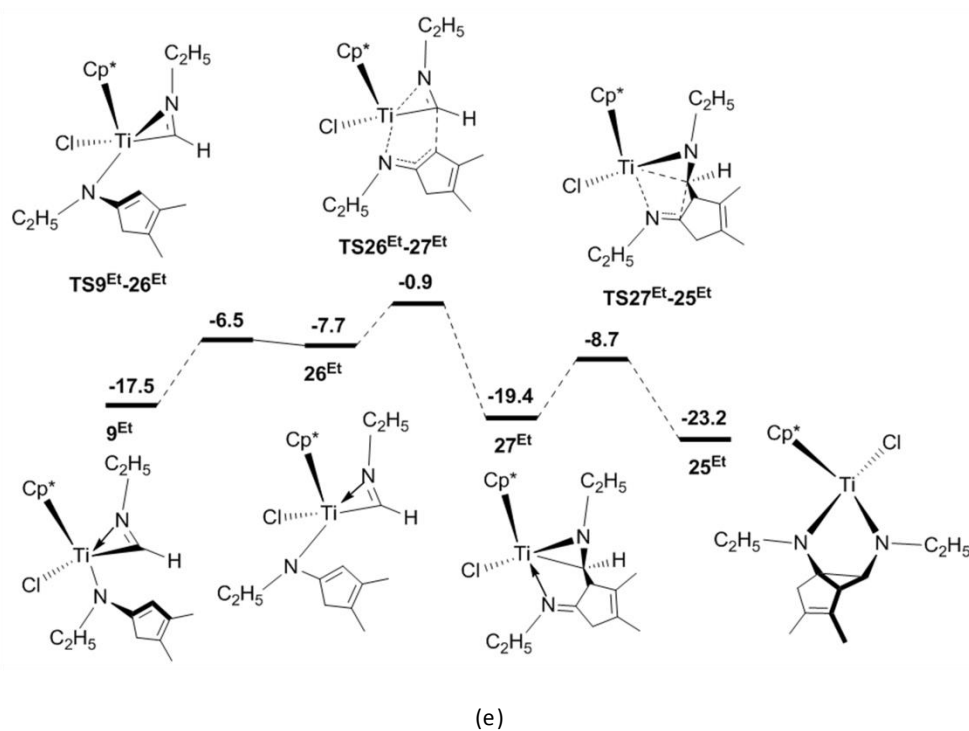

S9. **Figure S7.** Energetic profile of forming the titanaaziridine  $10^{\text{Ar}}$ . The Gibbs free energies are given in  $\text{kcal mol}^{-1}$  and the above values include the dispersion correction. Solvent: benzene

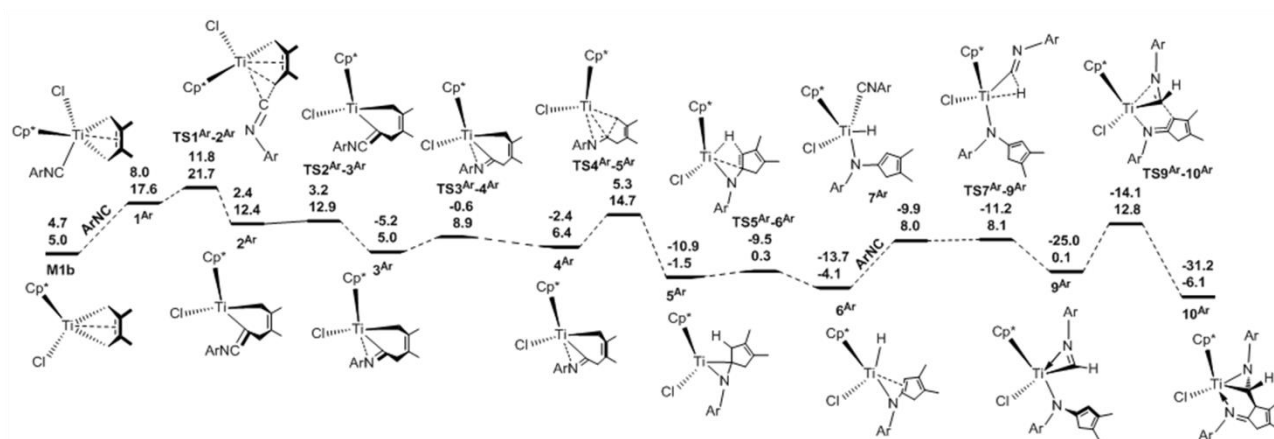



S10. **Figure S8.** Energetic profiles for the fragmentation of the titanaaziridine **10<sup>Ar</sup>** via the  $\beta$ -H and  $\gamma$ -H elimination reaction pathways. The Gibbs free energies are given in kcal mol<sup>-1</sup> and the above values include the dispersion correction. Solvent: benzene

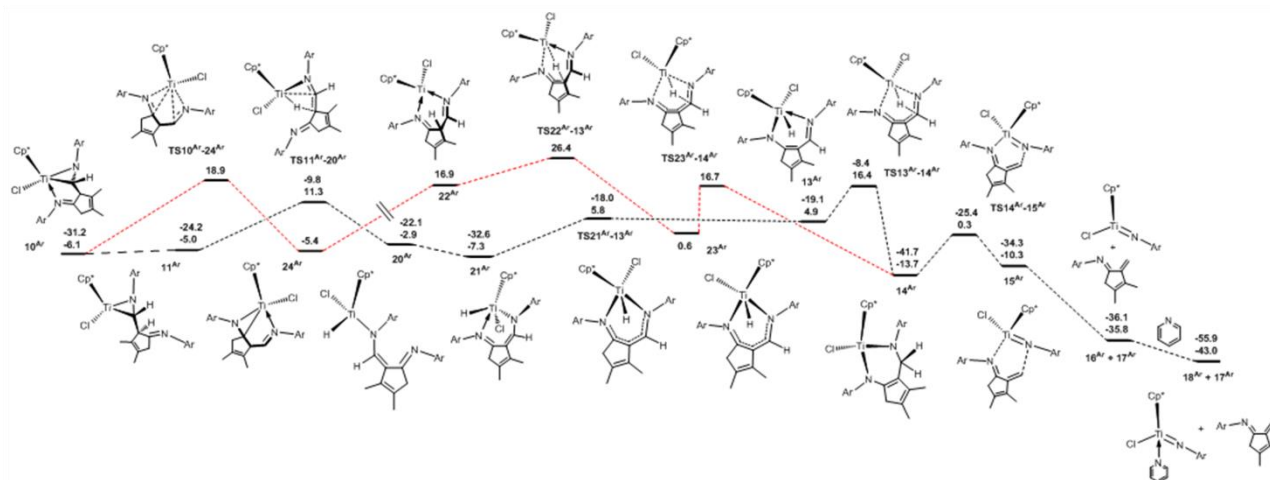

S11. **Figure S9.** Energetic profiles for the formation of diazatitanacyclopentane **25<sup>Ar</sup>** (a) via the insertion and the C-C coupling reaction pathways, and (b) via the isomerisation reaction pathway. The Gibbs free energies are given in kcal mol<sup>-1</sup> and the above values include the dispersion correction. Solvent: benzene

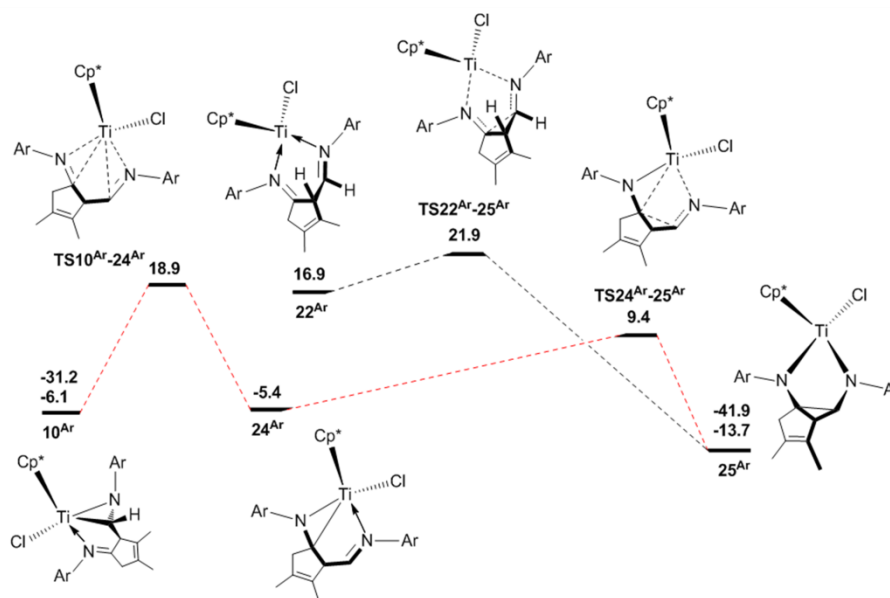

(a)

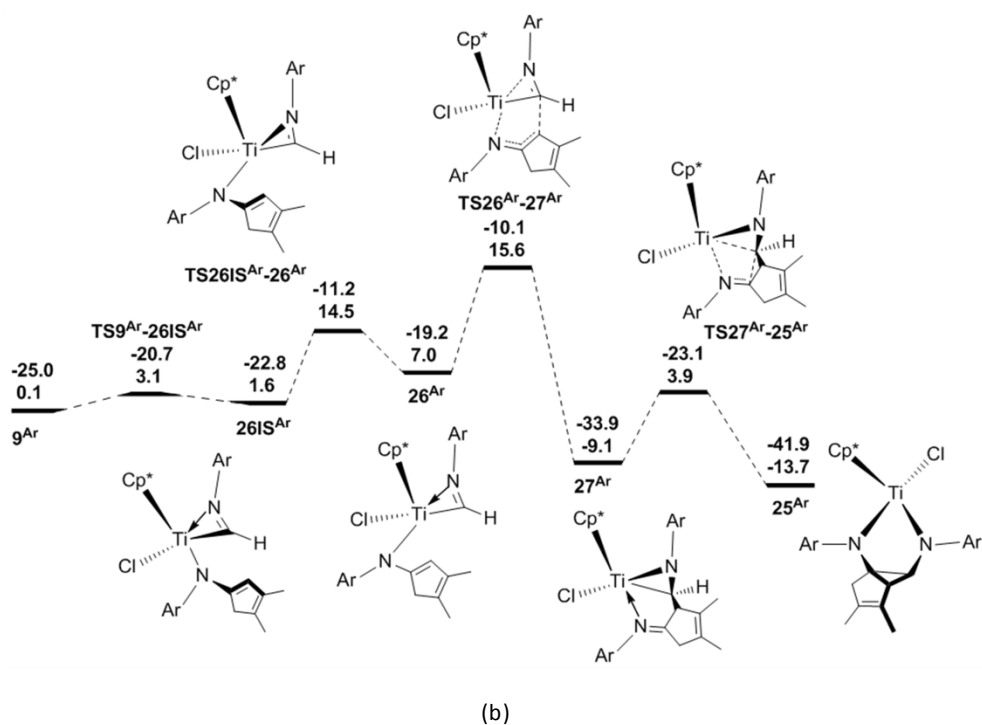

S12. **Figure S10.** Energy profiles for (a) migratory insertion of an 1-Ad-substituted isonitrile (1-AdNC) into the Ti–C bond in Ti complex  $1^{1\text{-Ad}}$ . (b) C–C reductive elimination in Ti complex  $4^{1\text{-Ad}}$ . (c) Fragmentation of titanaaziridine  $10^{1\text{-Ad}}$ . Formation of diazatitanacyclopentane  $25^{1\text{-Ad}}$  via (d) via the insertion and the C–C coupling reaction pathways, and (e) via the isomerisation reaction pathway. The Gibbs free energies are given in kcal mol<sup>-1</sup> and the above values include the dispersion correction. Solvent: benzene

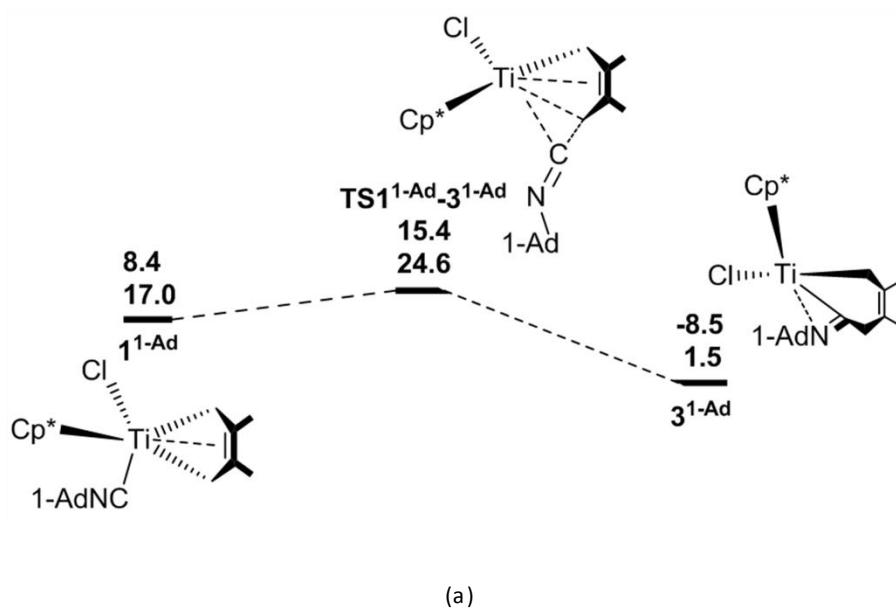

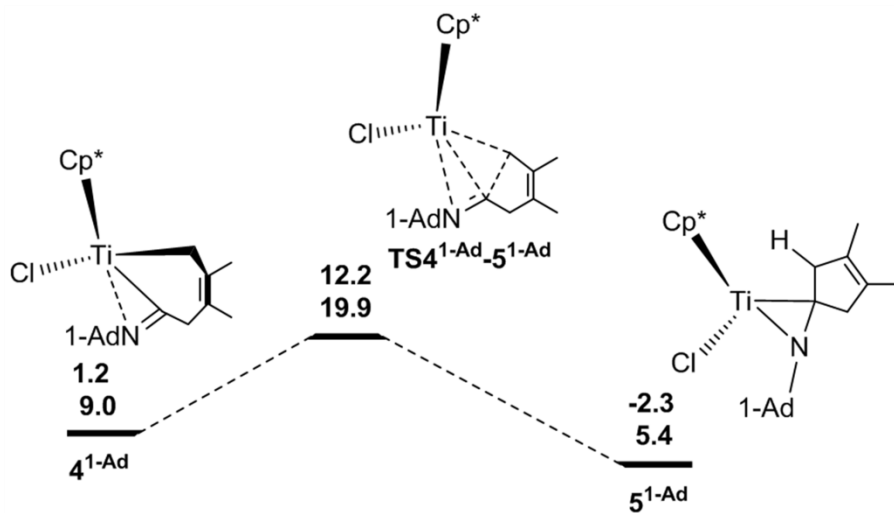

(b)

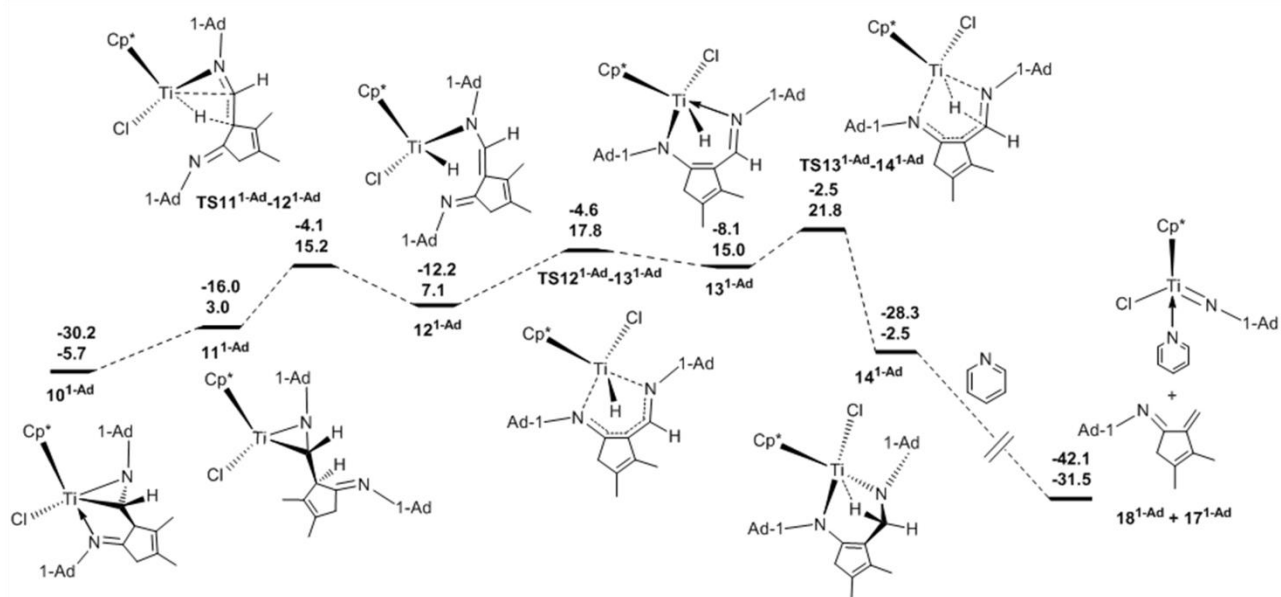

(c)

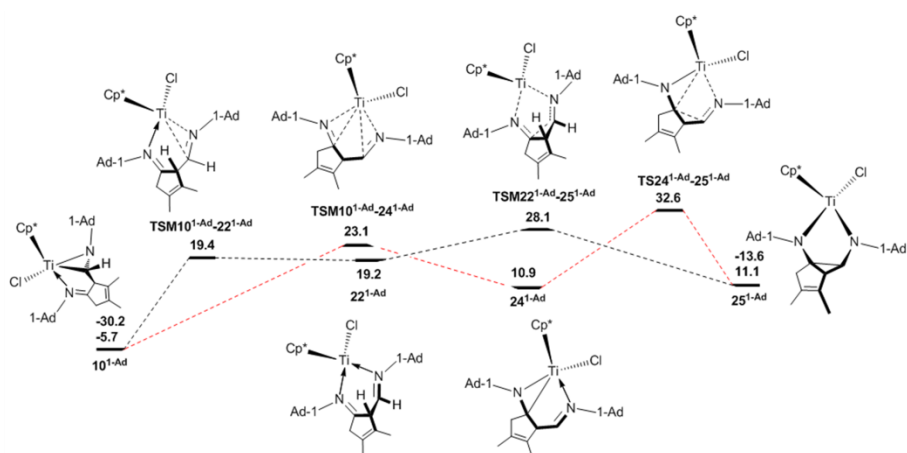

(d)

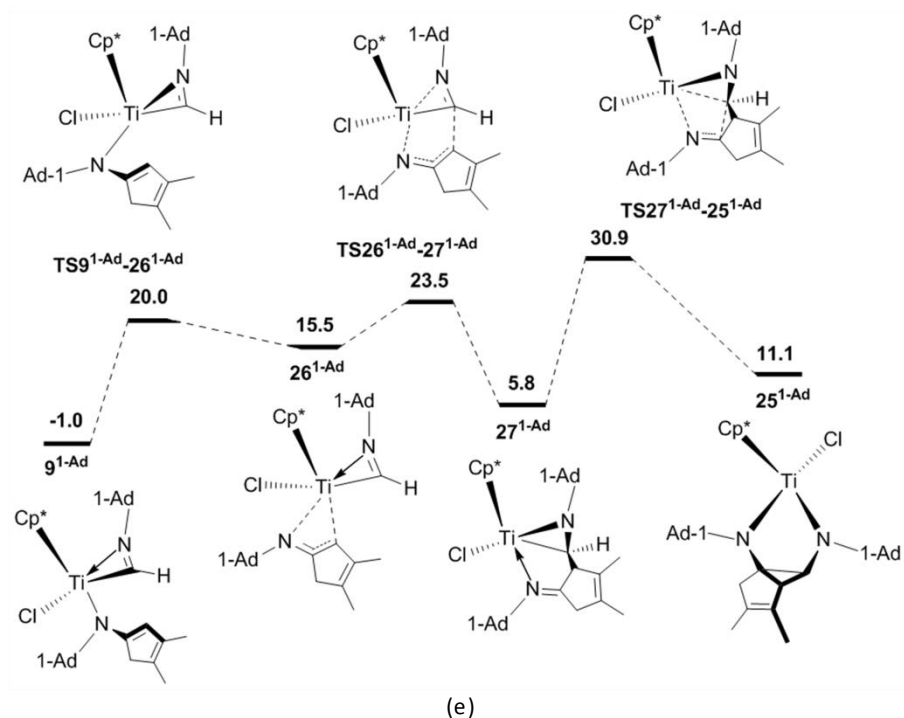

S13. **Figure S11.** Optimised structures (the methyl groups and the H atoms except for that involved in reaction were omitted for clarity, distances and angles are given in Å and degree, respectively; in benzene)

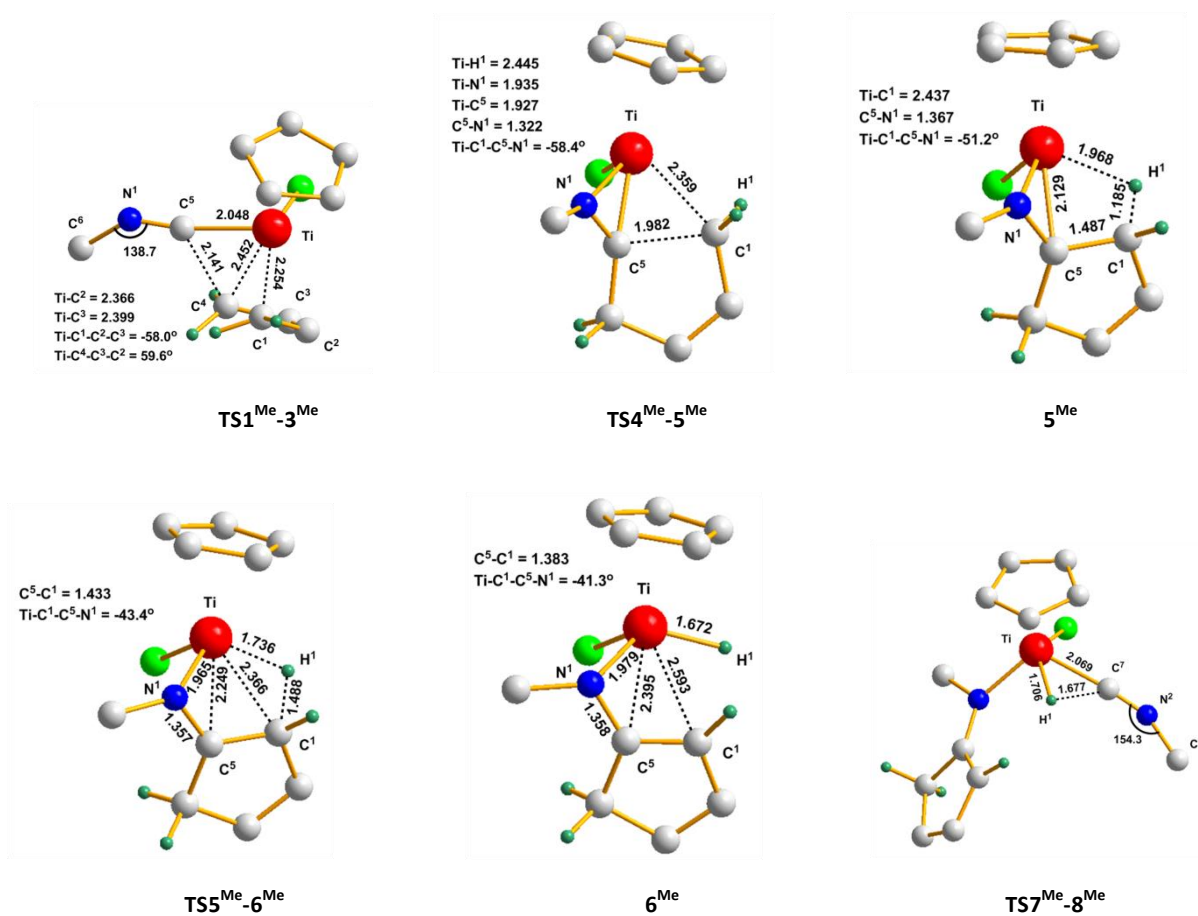

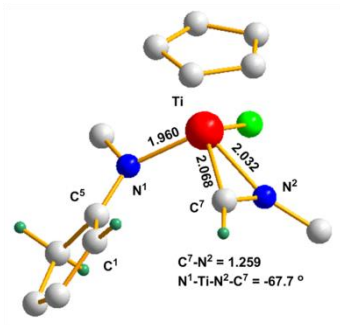

9<sup>Me</sup>

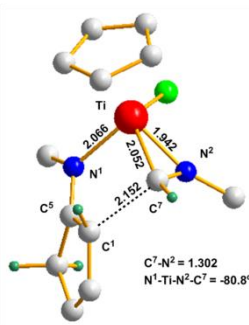

TS9<sup>Me</sup>-10<sup>Me</sup>

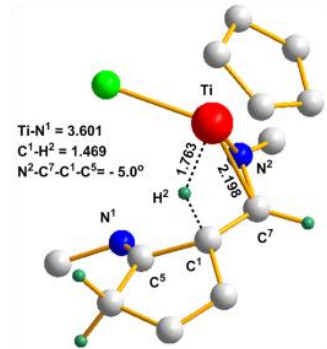

TS11<sup>Me</sup>-12<sup>Me</sup>

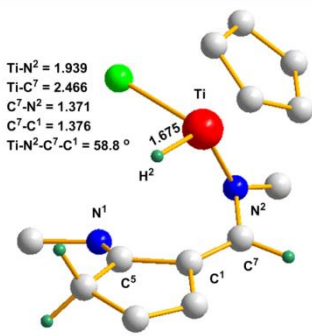

12<sup>Me</sup>

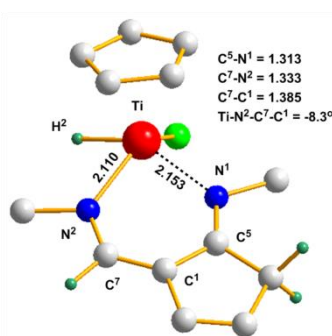

19<sup>Me</sup>

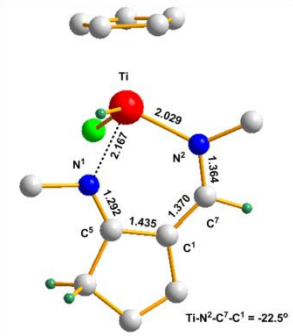

21<sup>Me</sup>

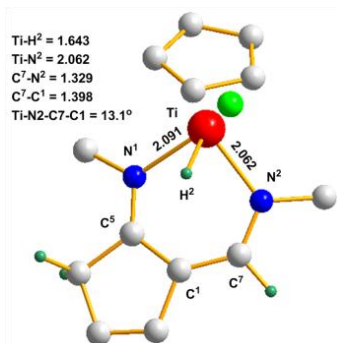

13<sup>Me</sup>

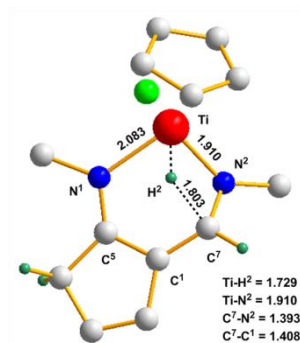

TS13<sup>Me</sup>-14<sup>Me</sup>

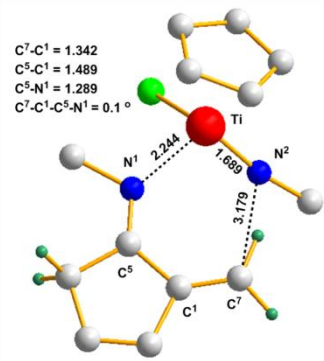

15<sup>Me</sup>

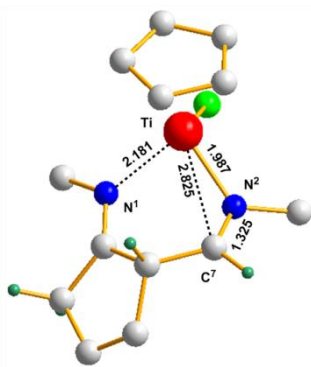

TS10<sup>Me</sup>-22<sup>Me</sup>

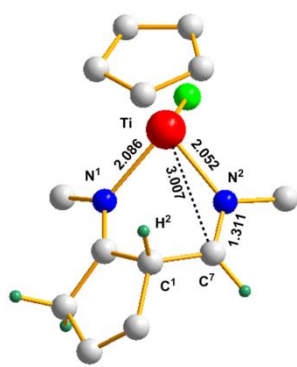

22<sup>Me</sup>

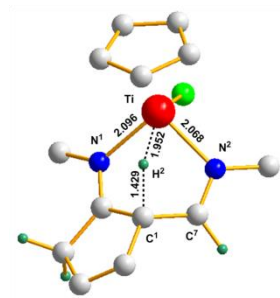

TS22<sup>Me</sup>-13<sup>Me</sup>

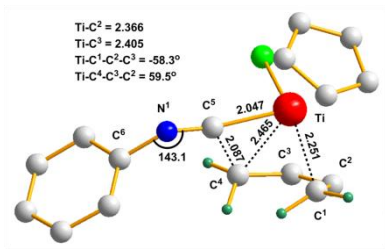

**TS1<sup>Ar</sup>-2<sup>Ar</sup>**

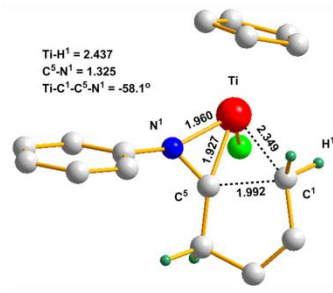

**TS4<sup>Ar</sup>-5<sup>Ar</sup>**

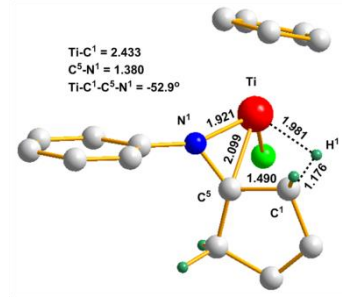

**5<sup>Ar</sup>**

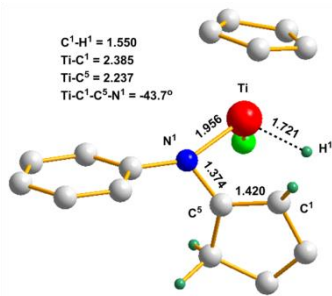

**TS5<sup>Ar</sup>-6<sup>Ar</sup>**

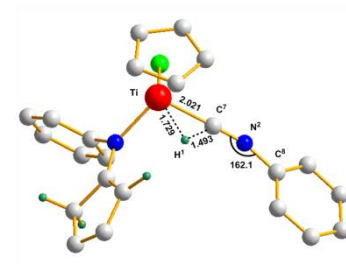

**TS7<sup>Ar</sup>-9<sup>Ar</sup>**

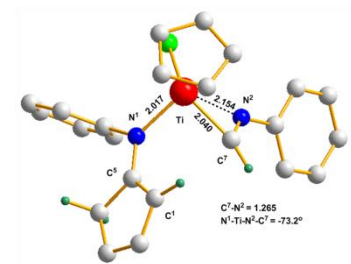

**9<sup>Ar</sup>**

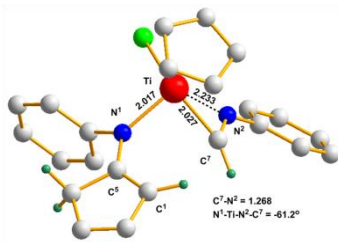

**26IS<sup>Ar</sup>**

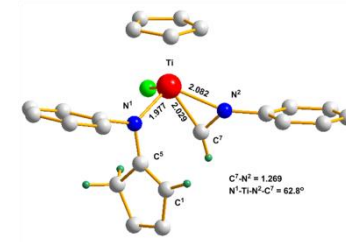

**26<sup>Ar</sup>**

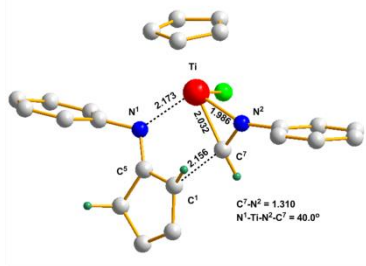

**TS26<sup>Ar</sup>-27<sup>Ar</sup>**

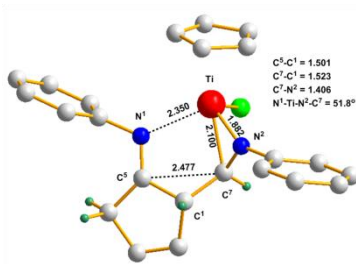

**27<sup>Ar</sup>**

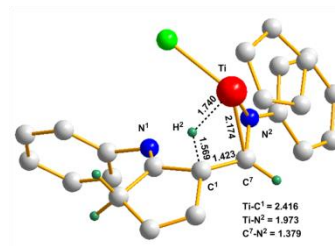

**TS11<sup>Ar</sup>-20<sup>Ar</sup>**

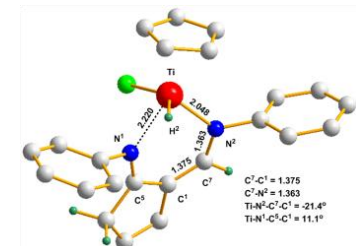

**21<sup>Ar</sup>**

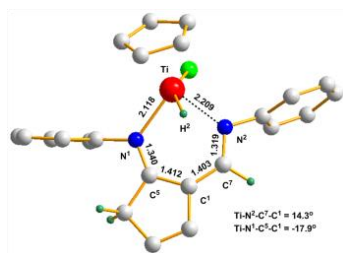

**13<sup>Ar</sup>**

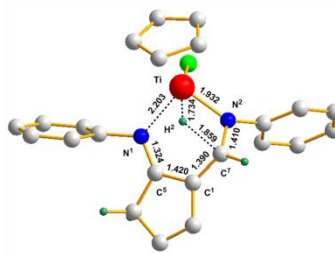

**TS13<sup>Ar</sup>-14<sup>Ar</sup>**

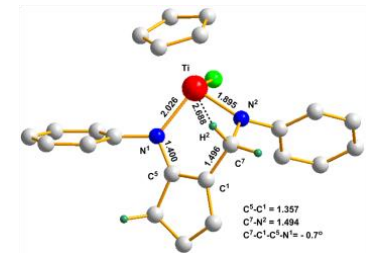

**14<sup>Ar</sup>**

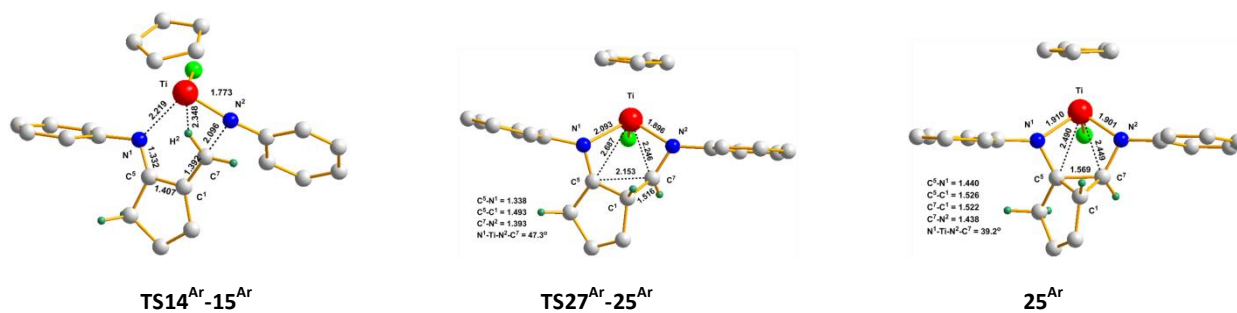

S14. **Figure S12.** Energetic profiles for  $\gamma$ -H elimination, rotation of Cp\*ClH, and addition of Ti-H across the azaallyl double bond, starting from **27<sup>Et</sup>**. The Gibbs free energies are given in kcal mol<sup>-1</sup>. Solvent: benzene

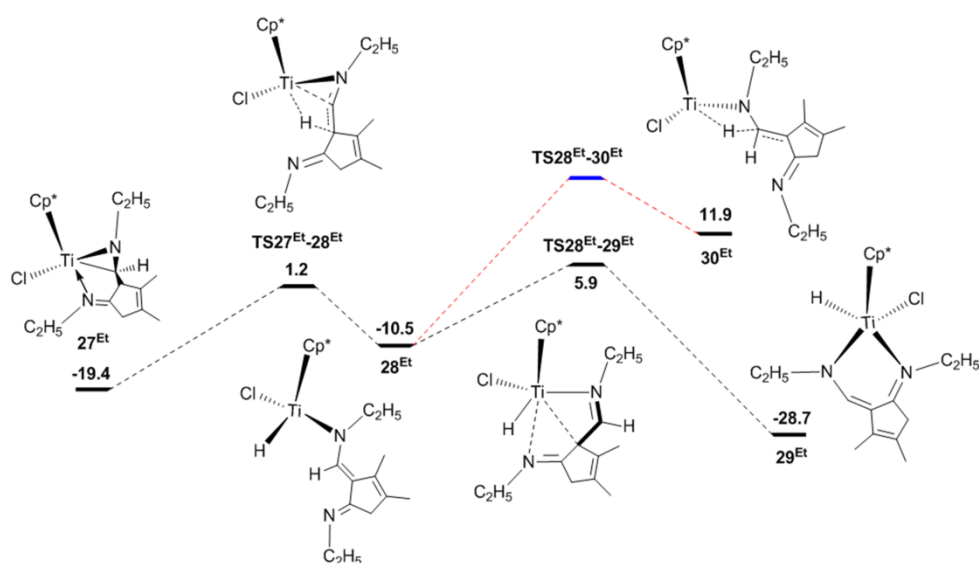



S15. **Scheme 2.** Summary of the optimum reaction pathways for *t*BuNC, MeNC, EtNC, ArNC, and 1-AdNC, and substituent effects on the reaction pathways.

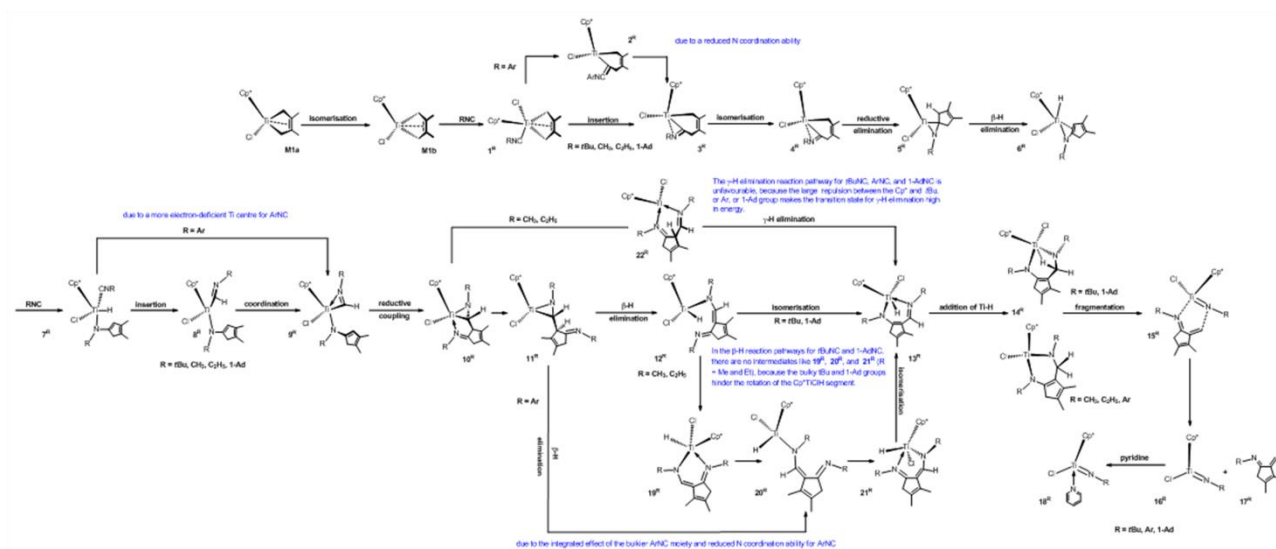

(a)

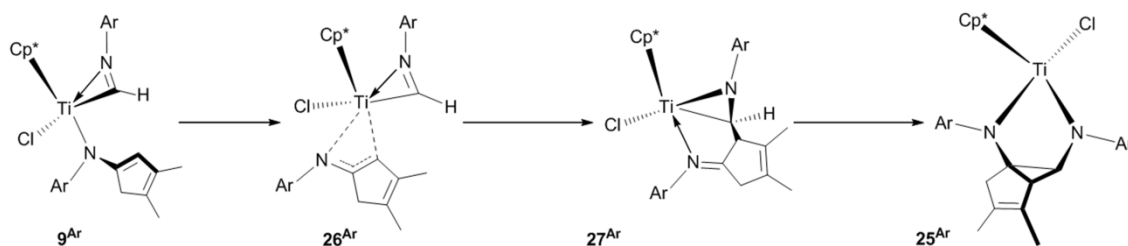

For ArNC, formation of **25<sup>Ar</sup>** ( $\sigma$  complex) via the isomerisation reaction pathway is kinetically favourable, due to that the  $\pi$  electron delocalisation lowers the activation energy barrier of the reaction and stabilises the product **25<sup>Ar</sup>**.

(b)

S16. **Table S1.** The calculated energies for species in the reaction pathways of bis-insertion and fragmentation of bis-insertion product in the case of *t*BuNC [referred to **M1a** and *t*BuNC (or 2 *t*BuNC)]. Note: 1)  $\Delta E_{1(B.-O.)}$  and  $\Delta E_{2(B.-O.)}$  denote the Born-Oppenheimer energy in pentane and benzene, respectively; 2)  $\Delta G$  denotes the Gibbs free energy in benzene; 3) energies are given in kcal mol<sup>-1</sup>.

| Mol.            | $\Delta E_{1(B.-O.)}$ | $\Delta E_{2(B.-O.)}$ | $\Delta G$ |
|-----------------|-----------------------|-----------------------|------------|
| <b>TSM1a-1b</b> | 16.8                  | 16.8                  | 16.6       |
| <b>M1b</b>      | 5.6                   | 5.5                   | 5.0        |
| <b>M2a</b>      | 4.9                   | 4.9                   | 17.1       |
| <b>TSM2a-3a</b> | 10.6                  | 10.8                  | 24.4       |



|                  |       |       |       |
|------------------|-------|-------|-------|
| <b>M2b</b>       | -6.3  |       |       |
| <b>TSM2b-3c</b>  | 16.1  |       |       |
| <b>M3c</b>       | 8.6   |       |       |
| <b>M3a</b>       | -12.4 | -12.0 | 1.0   |
| <b>TSM3a-3b</b>  | -3.5  | -3.2  | 10.8  |
| <b>M3b</b>       | -4.9  | -4.7  | 8.0   |
| <b>TSM3b-4</b>   | 5.5   | 5.8   | 19.5  |
| <b>M4</b>        | -9.1  | -8.7  | 5.2   |
| <b>TSM4-5</b>    | -7.7  | -7.3  | 6.8   |
| <b>M5</b>        | -12.3 | -12.0 | 1.4   |
| <b>M6b</b>       | -2.8  |       |       |
| <b>TSM6b-7b</b>  | 11.8  |       |       |
| <b>M6a</b>       | -11.1 | -10.6 | 14.1  |
| <b>TSM6a-7a</b>  | -10.3 | -9.7  | 15.9  |
| <b>M7a</b>       | -22.0 | -21.4 | 4.5   |
| <b>TSM7a-8a</b>  | -22.0 | -21.3 | 5.5   |
| <b>M8a</b>       | -29.0 | -28.2 | -1.0  |
| <b>TSM8a-9a</b>  | -18.8 | -18.0 | 10.7  |
| <b>M9a</b>       | -37.1 | -36.3 | -6.9  |
| <b>M10</b>       | -27.2 | -26.6 | -0.1  |
| <b>TSM10-11</b>  | -14.2 | -13.5 | 14.5  |
| <b>M11</b>       | -21.8 | -21.0 | 6.5   |
| <b>M12</b>       | -5.7  |       |       |
| <b>TSM12-13</b>  | 9.1   |       |       |
| <b>M13</b>       | 5.4   |       |       |
| <b>M14</b>       | -29.1 |       |       |
| <b>TSM14</b>     | -20.9 |       |       |
| <b>M15 + M16</b> | 34.3  | -34.5 | -23.6 |
| <b>M17</b>       | -24.6 |       |       |
| <b>TSM17-18</b>  | 11.9  |       |       |
| <b>M18</b>       | -28.8 |       |       |
| <b>TSM18</b>     | -19.9 |       |       |
| <b>TSM11-19</b>  | -15.1 | -14.3 | 15.7  |
| <b>M19</b>       | -17.9 | -17.2 | 12.6  |
| <b>TSM19-20</b>  | -10.7 | -10.0 | 19.8  |
| <b>M20</b>       | -34.5 | -34.0 | -4.8  |
| <b>TSM20-21</b>  | -20.5 | -19.7 | 9.9   |
| <b>M21</b>       | -31.8 | -31.1 | -4.1  |
| <b>M22 + M16</b> | -57.0 | -56.5 | -32.2 |
| <b>TSM9a-23</b>  |       | -11.6 | 17.8  |
| <b>M23</b>       |       | -13.7 | 14.4  |
| <b>TSM23-19</b>  |       | -1.5  | 28.0  |
| <b>M24</b>       | -21.8 | -21.0 | 7.6   |
| <b>M25</b>       | -22.3 | -21.6 | 5.4   |
| <b>M26</b>       | -11.3 | -10.7 | 18.0  |
| <b>TSM23-27</b>  |       | -3.7  | 25.6  |
| <b>M27</b>       |       | -20.9 | 8.9   |
| <b>TSM9a-28</b>  |       | -8.5  | 21.3  |
| <b>M28</b>       |       | -18.7 | 10.4  |
| <b>TSM28-27</b>  |       | 1.3   | 31.0  |
| <b>M8a</b>       |       | -28.2 | -1.0  |
| <b>TSM8a-8b</b>  |       | -10.0 | 18.6  |

|                 |       |      |
|-----------------|-------|------|
| <b>M8b</b>      | -14.4 | 13.9 |
| <b>TSM8b-9b</b> | -6.9  | 21.9 |
| <b>M9b</b>      | -24.9 | 4.5  |
| <b>TSM9b-27</b> | -0.4  | 29.7 |

S17. **Table S2.** The calculated Born-Oppenheimer energies ( $\Delta E_{2(B.-O.)}$ ; in kcal mol<sup>-1</sup>) for species in the reaction pathways of bis-insertion and fragmentation of bis-insertion product in the case of *t*BuNC, MeNC, EtNC, ArNC, and 1-AdNC [referred to **M1a** and RNC (or 2RNC)]. Note: 1) **TSA-B** denotes a transition state connected species **A** and **B**; 2) **23<sup>R</sup>** is an isomer of **13<sup>R</sup>**.

| Mol.                                                                                         | $\Delta E_{2(B.-O.)}$ |       |       |       |       |
|----------------------------------------------------------------------------------------------|-----------------------|-------|-------|-------|-------|
|                                                                                              | <i>t</i> Bu           | Me    | Et    | Ar    | 1-Ad  |
| <b>1<sup>R</sup></b>                                                                         | 4.9                   | 5.3   | 5.1   | 4.3   | 4.6   |
| <b>TS1<sup>R</sup>-3<sup>R</sup></b> (for R = Ar, TS1 <sup>R</sup> -2 <sup>R</sup> )         | 10.8                  | 8.1   | 7.8   | 7.8   | 10.8  |
| <b>2<sup>R</sup></b>                                                                         |                       |       |       | -0.9  |       |
| <b>TS2<sup>R</sup>-3<sup>R</sup></b>                                                         |                       |       |       | -0.8  |       |
| <b>3<sup>R</sup></b>                                                                         | -12.0                 | -14.8 | -14.4 | -8.5  | -11.8 |
| <b>TS3<sup>R</sup>-4<sup>R</sup></b>                                                         | -3.2                  | -8.9  |       | -5.5  |       |
| <b>4<sup>R</sup></b>                                                                         | -4.7                  | -10.4 | -10.0 | -6.8  | -4.4  |
| <b>TS4<sup>R</sup>-5<sup>R</sup></b>                                                         | 5.8                   | -1.7  | -1.0  | 0.4   | -6.0  |
| <b>5<sup>R</sup></b>                                                                         | -8.7                  | -17.1 | -16.2 | -15.7 | -8.6  |
| <b>TS5<sup>R</sup>-6<sup>R</sup></b>                                                         | -7.3                  | -16.7 |       | -14.2 |       |
| <b>6<sup>R</sup></b>                                                                         | -12.0                 | -22.5 |       | -17.9 |       |
| <b>7<sup>R</sup></b>                                                                         | -10.6                 | -25.3 |       | -18.4 |       |
| <b>TS7<sup>R</sup>-8<sup>R</sup></b> (for R=Ar, TS7 <sup>R</sup> -9 <sup>R</sup> )           | -9.7                  | -24.8 |       | -18.4 |       |
| <b>8<sup>R</sup></b>                                                                         | -21.4                 | -33.7 |       |       |       |
| <b>TS8<sup>R</sup>-9<sup>R</sup></b>                                                         | -21.3                 | -33.0 |       |       |       |
| <b>9<sup>R</sup></b>                                                                         | -28.2                 | -45.8 | -42.7 | -28.5 | -28.0 |
| <b>TS9<sup>R</sup>-10<sup>R</sup></b>                                                        | -18.0                 | -36.1 |       | -17.1 |       |
| <b>10<sup>R</sup></b>                                                                        | -36.3                 | -56.1 | -52.0 | -35.7 | -35.4 |
| <b>11<sup>R</sup></b>                                                                        | -26.6                 | -38.7 | -36.7 | -32.4 | -24.6 |
| <b>TS11<sup>R</sup>-12<sup>R</sup></b> (for R = Ar, TS11 <sup>R</sup> -20 <sup>R</sup> )     | -13.5                 | -23.9 | -22.1 | -17.4 | -13.1 |
| <b>12<sup>R</sup></b>                                                                        | -21.0                 | -33.6 | -31.2 |       | -21.0 |
| <b>TS12<sup>R</sup>-13<sup>R</sup></b> (for R = Me, Et, TS12 <sup>R</sup> -19 <sup>R</sup> ) | -14.3                 | -33.8 |       |       | -12.8 |
| <b>13<sup>R</sup></b>                                                                        | -17.2                 | -48.0 | -44.3 | -24.8 | -15.4 |
| <b>TS13<sup>R</sup>-14<sup>R</sup></b>                                                       | -10.0                 | -35.8 | -31.6 | -13.6 | -8.7  |
| <b>14<sup>R</sup></b>                                                                        | -34.0                 | -65.5 | -62.6 | -43.3 | -32.6 |
| <b>TS14<sup>R</sup>-15<sup>R</sup></b>                                                       | -19.7                 | -45.0 |       | -28.7 |       |
| <b>15<sup>R</sup></b>                                                                        | -31.1                 | -52.2 |       | -38.4 |       |
| <b>16<sup>R</sup> + 17<sup>R</sup></b>                                                       | -34.5                 | -41.7 |       | -47.3 |       |
| <b>18<sup>R</sup> + 17<sup>R</sup></b>                                                       | -56.7                 | -64.1 | -63.7 | -68.5 | -56.1 |
| <b>19<sup>R</sup></b>                                                                        | -21.0                 | -57.6 | -52.8 |       |       |
| <b>20<sup>R</sup></b>                                                                        |                       | -35.5 | -34.6 | -29.9 |       |
| <b>21<sup>R</sup></b>                                                                        | -10.7                 | -46.0 | -43.5 | -36.4 |       |
| <b>TS21<sup>R</sup>-13<sup>R</sup></b>                                                       |                       | -46.6 | -41.3 | -24.5 |       |
| <b>TS10<sup>R</sup>-22<sup>R</sup></b>                                                       | -11.6                 | -35.9 | -31.7 |       |       |
| <b>22<sup>R</sup></b>                                                                        | -13.7                 | -39.3 | -38.1 | -12.8 |       |

|                                                                                          |      |       |       |       |
|------------------------------------------------------------------------------------------|------|-------|-------|-------|
| TS22 <sup>R</sup> -13 <sup>R</sup> (for R = Et, Ar, TS22 <sup>R</sup> -23 <sup>R</sup> ) | -1.5 | -24.8 | -22.9 | -2.9  |
| 23 <sup>R</sup>                                                                          |      |       | -43.7 | -29.1 |
| TS23 <sup>R</sup> -14 <sup>R</sup>                                                       |      |       |       | -13.3 |

S18. **Table S3.** The calculated Born-Oppenheimer energies ( $\Delta E_{2(B.-O.)}$ ; in kcal mol<sup>-1</sup>) for species in the reaction pathways of forming diazatitanacyclopentane **25<sup>R</sup>** in the case of *t*BuNC, MeNC, EtNC, ArNC, and 1-AdNC [referred to **M1a** and RNC (or 2RNC)]. Note: 1) **TSA-B** denotes a transition state connected species **A** and **B**; 2) **26IS<sup>R</sup>** is an isomer of **26<sup>R</sup>**.

| Mol.                                                                             | $\Delta E_{2(B.-O.)}$ |       |       |       |       |
|----------------------------------------------------------------------------------|-----------------------|-------|-------|-------|-------|
|                                                                                  | <i>t</i> Bu           | Me    | Et    | Ar    | 1-Ad  |
| <b>10<sup>R</sup></b>                                                            | -36.3                 | -56.1 | -52.0 | -35.7 | -35.4 |
| <b>TS10<sup>R</sup>-24<sup>R</sup></b>                                           | -8.5                  | -36.3 | -29.1 | -11.0 | -7.6  |
| <b>24<sup>R</sup></b>                                                            | -18.7                 | -47.7 | -43.1 | -35.3 | -18.2 |
| <b>TS24<sup>R</sup>-25<sup>R</sup></b>                                           | 1.3                   | -35.9 | -33.6 | -20.9 | 2.3   |
| <b>25<sup>R</sup></b>                                                            | -20.9                 | -54.3 | -50.5 | -43.7 | -19.8 |
| <b>TS10<sup>R</sup>-22<sup>R</sup></b>                                           | -11.6                 | -35.9 | -31.7 |       | -10.3 |
| <b>22<sup>R</sup></b>                                                            | -13.7                 | -39.3 | -38.1 | -12.8 | -9.9  |
| <b>TS22<sup>R</sup>-25<sup>R</sup></b>                                           | -3.7                  | -31.5 | -29.3 | -7.9  | -1.7  |
| <b>9<sup>R</sup></b>                                                             | -28.2                 | -45.8 | -42.7 | -28.5 | -28.0 |
| <b>TS9<sup>R</sup>-26<sup>R</sup> (R = Ar, TS9<sup>R</sup>-26IS<sup>R</sup>)</b> | -10.0                 | -37.5 | -33.7 | -25.8 | -9.3  |
| <b>26IS<sup>R</sup></b>                                                          |                       |       |       | -26.7 |       |
| <b>TS26IS<sup>R</sup>-26<sup>R</sup></b>                                         |                       |       |       | -15.7 |       |
| <b>26<sup>R</sup></b>                                                            | -14.4                 | -37.7 | -33.8 | -21.3 | -13.7 |
| <b>TS26<sup>R</sup>-27<sup>R</sup></b>                                           | -6.9                  | -31.4 | -28.3 | -13.9 | -5.7  |
| <b>27<sup>R</sup></b>                                                            | -24.9                 | -49.1 | -47.2 | -38.2 | -24.1 |
| <b>TS27<sup>R</sup>-25<sup>R</sup></b>                                           | -0.4                  | -40.2 | -36.3 | -26.8 | -0.2  |

S19. **Table S4.** Imaginary frequencies for transition states on the optimum reaction pathways, values in and outside parentheses denote imaginary frequencies calculated in *n*-pentane and benzene, respectively.

| Species                                | Imaginary Frequency      | Species                                | Imaginary Frequency      | Species                                | Imaginary Frequency      |
|----------------------------------------|--------------------------|----------------------------------------|--------------------------|----------------------------------------|--------------------------|
| <b>TSM1a-1b</b>                        | -49.6904<br>(-49.7248)   | <b>TSM2a-3a</b>                        | -207.3180<br>(-205.3061) | <b>TSM3a-3b</b>                        | -40.9766<br>(-40.7349)   |
| <b>TSM3b-4</b>                         | -386.2885<br>(-384.5758) | <b>TSM4-5</b>                          | -675.5377<br>(-673.9984) | <b>TSM6a-7a</b>                        | -131.7989<br>(-142.6350) |
| <b>TSM7a-8a</b>                        | -42.1885<br>(-37.0399)   | <b>TSM8a-9a</b>                        | -408.7640<br>(-407.5426) | <b>TSM10-11</b>                        | -689.1489<br>(-686.2643) |
| <b>TSM11-19</b>                        | -28.3850                 | <b>TSM19-20</b>                        | -509.5880                | <b>TSM20-21</b>                        | -324.8016                |
| <b>TS1<sup>Me</sup>-3<sup>Me</sup></b> | -93.0918                 | <b>TS3<sup>Me</sup>-4<sup>Me</sup></b> | -57.6638                 | <b>TS4<sup>Me</sup>-5<sup>Me</sup></b> | -368.2559                |
| <b>TS5<sup>Me</sup>-6<sup>Me</sup></b> | -715.9386                | <b>TS7<sup>Me</sup>-8<sup>Me</sup></b> | -186.8282                | <b>TS8<sup>Me</sup>-9<sup>Me</sup></b> | -56.4152                 |

|                                          |           |                                          |            |                                          |            |
|------------------------------------------|-----------|------------------------------------------|------------|------------------------------------------|------------|
| TS9 <sup>Me</sup> -10 <sup>Me</sup>      | -383.2096 | TS11 <sup>Me</sup> -12 <sup>Me</sup>     | -697.7267  | TS12 <sup>Me</sup> -13 <sup>Me</sup>     | -29.6233   |
| TS21 <sup>Me</sup> -13 <sup>Me</sup>     | -77.7236  | TS10 <sup>Me</sup> -22 <sup>Me</sup>     | -156.6364  | TS22 <sup>Me</sup> -13 <sup>Me</sup>     | -1098.0768 |
| TS13 <sup>Me</sup> -14 <sup>Me</sup>     | -659.9720 | TS14 <sup>Me</sup> -15 <sup>Me</sup>     | -360.8384  | TS1 <sup>Et</sup> -3 <sup>Et</sup>       | -94.3736   |
| TS4 <sup>Et</sup> -5 <sup>Et</sup>       | -370.8034 | TS11 <sup>Et</sup> -12 <sup>Et</sup>     | -704.9099  | TS21 <sup>Et</sup> -13 <sup>Et</sup>     | -126.6873  |
| TS10 <sup>Et</sup> -22 <sup>Et</sup>     | -177.9423 | TS22 <sup>t</sup> -23 <sup>Et</sup>      | -1105.7016 | TS13 <sup>Et</sup> -14 <sup>Et</sup>     | -596.2601  |
| TS1 <sup>Ar</sup> -2 <sup>Ar</sup>       | -122.9318 | TS2 <sup>Ar</sup> -3 <sup>Ar</sup>       | -23.1846   | TS3 <sup>Ar</sup> -4 <sup>Ar</sup>       | -40.5931   |
| TS4 <sup>Ar</sup> -5 <sup>Ar</sup>       | -358.5559 | TS5 <sup>Ar</sup> -6 <sup>Ar</sup>       | -711.5665  | TS7 <sup>Ar</sup> -9 <sup>Ar</sup>       | -268.8599  |
| TS9 <sup>Ar</sup> -10 <sup>Ar</sup>      | -333.7148 | TS10 <sup>Ar</sup> -24 <sup>Ar</sup>     | -209.8823  | TS11 <sup>Ar</sup> -20 <sup>Ar</sup>     | -717.8056  |
| TS21 <sup>Ar</sup> -13 <sup>Ar</sup>     | -42.8225  | TS13 <sup>Ar</sup> -14 <sup>Ar</sup>     | -552.8481  | TS14 <sup>Ar</sup> -15 <sup>Ar</sup>     | -308.7239  |
| TS9 <sup>Ar</sup> -26IS <sup>Ar</sup>    | -43.7087  | TS26IS <sup>Ar</sup> -26 <sup>Ar</sup>   | -17.0680   | TS26 <sup>Ar</sup> -27 <sup>Ar</sup>     | -391.5094  |
| TS27 <sup>Ar</sup> -25 <sup>Ar</sup>     | -186.8926 | TS1 <sup>1-Ad</sup> -3 <sup>1-Ad</sup>   | -204.3237  | TS4 <sup>1-Ad</sup> -5 <sup>1-Ad</sup>   | -381.4905  |
| TS11 <sup>1-Ad</sup> -12 <sup>1-Ad</sup> | -690.2560 | TS12 <sup>1-Ad</sup> -13 <sup>1-Ad</sup> | -30.0561   | TS13 <sup>1-Ad</sup> -14 <sup>1-Ad</sup> | -498.2074  |

S20. Calculated Cartesian coordinates and electronic energies (E) for relevant species in the calculation method and on the optimum reaction pathways.

In n-pentane

By B3LYP/BS1

$10^{1-Ad}$  (E = -1663.743672 a.u.)

| Center Number | Atomic Number | Coordinates (Angstroms) |           |           |
|---------------|---------------|-------------------------|-----------|-----------|
|               |               | X                       | Y         | Z         |
| 1             | 22            | -0.033362               | 1.199635  | 0.227001  |
| 2             | 7             | 1.513135                | 0.146133  | 0.129758  |
| 3             | 6             | 1.152685                | 0.006920  | 1.471418  |
| 4             | 7             | -1.468195               | -0.628764 | 0.563920  |
| 5             | 6             | 0.910773                | 3.160465  | 1.189608  |
| 6             | 6             | -0.026889               | 2.645287  | 2.136819  |
| 7             | 6             | 0.179768                | 3.607108  | 0.054983  |
| 8             | 17            | -0.396084               | 1.203410  | -2.172012 |
| 9             | 6             | -1.335047               | 2.793743  | 1.585930  |
| 10            | 6             | -1.207745               | 3.390415  | 0.301993  |
| 11            | 6             | 2.775698                | -0.249703 | -0.530793 |
| 12            | 6             | -0.845412               | -1.538931 | 1.223532  |
| 13            | 6             | -2.764036               | -0.912126 | -0.180997 |
| 14            | 6             | 0.384383                | -1.190927 | 2.033582  |
| 15            | 1             | 1.818513                | 0.443971  | 2.219218  |
| 16            | 6             | 1.040871                | -2.541837 | 2.298611  |
| 17            | 1             | 0.005920                | -0.830177 | 3.007456  |
| 18            | 6             | -1.053176               | -3.044131 | 1.327252  |
| 19            | 6             | 0.255122                | -3.550109 | 1.896437  |
| 20            | 1             | -1.870642               | -3.278717 | 2.020661  |
| 21            | 1             | -1.316672               | -3.502119 | 0.371366  |
| 22            | 6             | 0.479357                | -5.034088 | 2.009379  |
| 23            | 6             | 2.341677                | -2.629714 | 3.047264  |
| 24            | 1             | 2.627237                | -3.664769 | 3.257100  |
| 25            | 1             | 2.266641                | -2.097988 | 4.007011  |
| 26            | 1             | 3.160348                | -2.160288 | 2.490742  |
| 27            | 1             | 1.443630                | -5.274139 | 2.466400  |
| 28            | 1             | 0.449772                | -5.509517 | 1.018663  |
| 29            | 1             | -0.308631               | -5.507385 | 2.613025  |
| 30            | 6             | 3.000044                | 0.588615  | -1.816553 |
| 31            | 6             | 4.005273                | -0.046059 | 0.399434  |
| 32            | 6             | 2.691155                | -1.751905 | -0.936828 |
| 33            | 6             | 3.993045                | -2.196132 | -1.647743 |
| 34            | 1             | 1.826331                | -1.882912 | -1.600249 |
| 35            | 1             | 2.515269                | -2.363908 | -0.042999 |
| 36            | 6             | 4.196935                | -1.344965 | -2.924702 |
| 37            | 6             | 5.196911                | -1.993383 | -0.695064 |
| 38            | 1             | 3.913000                | -3.257875 | -1.919887 |
| 39            | 6             | 5.305801                | -0.496916 | -0.311590 |
| 40            | 1             | 6.124459                | -2.324253 | -1.183020 |
| 41            | 1             | 5.070941                | -2.606731 | 0.209018  |
| 42            | 6             | 5.512418                | 0.349329  | -1.590871 |
| 43            | 1             | 6.156256                | -0.352183 | 0.369277  |
| 44            | 1             | 3.871579                | -0.615305 | 1.326923  |
| 45            | 1             | 4.077288                | 1.013730  | 0.676155  |
| 46            | 6             | 4.301168                | 0.149815  | -2.532881 |
| 47            | 1             | 3.056073                | 1.652706  | -1.547450 |
| 48            | 1             | 2.138791                | 0.472347  | -2.479652 |
| 49            | 1             | 4.432969                | 0.758191  | -3.438026 |
| 50            | 1             | 5.615424                | 1.411722  | -1.327297 |
| 51            | 1             | 6.441215                | 0.049363  | -2.096413 |
| 52            | 1             | 3.355240                | -1.494810 | -3.614851 |
| 53            | 1             | 5.109296                | -1.662621 | -3.449145 |
| 54            | 6             | -3.798960               | -1.703912 | 0.672959  |

|    |   |           |           |           |
|----|---|-----------|-----------|-----------|
| 55 | 6 | -3.417163 | 0.453620  | -0.521911 |
| 56 | 6 | -2.484445 | -1.675283 | -1.508017 |
| 57 | 6 | -3.808090 | -1.876493 | -2.290122 |
| 58 | 1 | -1.769153 | -1.100437 | -2.103814 |
| 59 | 1 | -2.032775 | -2.652425 | -1.299595 |
| 60 | 6 | -4.420343 | -0.498257 | -2.637110 |
| 61 | 6 | -4.808943 | -2.683559 | -1.427553 |
| 62 | 1 | -3.589645 | -2.426909 | -3.215001 |
| 63 | 6 | -5.116023 | -1.902969 | -0.124958 |
| 64 | 1 | -5.738099 | -2.854627 | -1.988279 |
| 65 | 1 | -4.390938 | -3.672100 | -1.187179 |
| 66 | 6 | -5.739184 | -0.534666 | -0.479126 |
| 67 | 1 | -5.814521 | -2.480931 | 0.495473  |
| 68 | 1 | -3.423153 | -2.690976 | 0.946653  |
| 69 | 1 | -3.995756 | -1.153874 | 1.604322  |
| 70 | 6 | -4.725818 | 0.266373  | -1.326908 |
| 71 | 1 | -3.632174 | 0.982281  | 0.412905  |
| 72 | 1 | -2.714271 | 1.054711  | -1.101501 |
| 73 | 1 | -5.138907 | 1.255958  | -1.565197 |
| 74 | 1 | -6.675627 | -0.678713 | -1.035528 |
| 75 | 1 | -5.988178 | 0.017588  | 0.438272  |
| 76 | 1 | -5.342403 | -0.631189 | -3.220018 |
| 77 | 1 | -3.720781 | 0.078400  | -3.255855 |
| 78 | 6 | 0.252041  | 2.296484  | 3.577404  |
| 79 | 6 | 2.383677  | 3.369637  | 1.438782  |
| 80 | 6 | 0.742885  | 4.316092  | -1.150372 |
| 81 | 6 | -2.311227 | 3.840540  | -0.620834 |
| 82 | 6 | -2.605873 | 2.537233  | 2.362113  |
| 83 | 1 | 0.046121  | 3.163443  | 4.223217  |
| 84 | 1 | 1.295984  | 2.011813  | 3.734856  |
| 85 | 1 | -0.377410 | 1.471730  | 3.929656  |
| 86 | 1 | 2.552190  | 4.325583  | 1.956042  |
| 87 | 1 | 2.953467  | 3.395434  | 0.505358  |
| 88 | 1 | 2.807917  | 2.579012  | 2.065321  |
| 89 | 1 | 0.664885  | 5.405851  | -1.021699 |
| 90 | 1 | 0.205420  | 4.040709  | -2.061775 |
| 91 | 1 | 1.799447  | 4.076288  | -1.305472 |
| 92 | 1 | -2.339733 | 4.937937  | -0.673977 |
| 93 | 1 | -3.293398 | 3.500587  | -0.280324 |
| 94 | 1 | -2.156082 | 3.463241  | -1.638025 |
| 95 | 1 | -2.644536 | 3.187301  | 3.247443  |
| 96 | 1 | -2.680212 | 1.502070  | 2.715854  |
| 97 | 1 | -3.495003 | 2.750727  | 1.762857  |

$10^{1-Ad}IS$  (E = -1663.7436724 a.u.)

| Center Number | Atomic Number | Coordinates (Angstroms) |           |           |
|---------------|---------------|-------------------------|-----------|-----------|
|               |               | X                       | Y         | Z         |
| 1             | 22            | 0.033098                | 1.199254  | 0.226921  |
| 2             | 7             | -1.513152               | 0.145455  | 0.129640  |
| 3             | 6             | -1.152531               | 0.006098  | 1.471301  |
| 4             | 7             | 1.468429                | -0.628864 | 0.563692  |
| 5             | 6             | -0.911186               | 3.159892  | 1.189632  |
| 6             | 6             | 0.026252                | 2.644681  | 2.137026  |
| 7             | 6             | -0.179909               | 3.606719  | 0.055237  |
| 8             | 17            | 0.396371                | 1.203612  | -2.171911 |
| 9             | 6             | 1.334544                | 2.793347  | 1.586508  |
| 10            | 6             | 1.207548                | 3.390188  | 0.302634  |
| 11            | 6             | -2.776068               | -0.249875 | -0.530610 |
| 12            | 6             | 0.845801                | -1.539334 | 1.223047  |
| 13            | 6             | 2.764475                | -0.911855 | -0.181108 |
| 14            | 6             | -0.384127               | -1.191791 | 2.033082  |
| 15            | 1             | -1.818373               | 0.442948  | 2.219186  |
| 16            | 6             | -1.040471               | -2.542886 | 2.297539  |
| 17            | 1             | -0.005768               | -0.831367 | 3.007130  |
| 18            | 6             | 1.053849                | -3.044501 | 1.326446  |

|    |   |           |           |           |
|----|---|-----------|-----------|-----------|
| 19 | 6 | -0.254489 | -3.550901 | 1.895174  |
| 20 | 1 | 1.317791  | -3.502251 | 0.370576  |
| 21 | 1 | 1.871136  | -3.279041 | 2.020087  |
| 22 | 6 | -0.478528 | -5.034937 | 2.007626  |
| 23 | 6 | -2.341343 | -2.631167 | 3.046004  |
| 24 | 1 | -2.627718 | -3.666380 | 3.253949  |
| 25 | 1 | -3.159620 | -2.160066 | 2.490334  |
| 26 | 1 | -2.265907 | -2.101270 | 4.006736  |
| 27 | 1 | -1.443050 | -5.275256 | 2.463976  |
| 28 | 1 | 0.309137  | -5.508256 | 2.611676  |
| 29 | 1 | -0.448213 | -5.510141 | 1.016822  |
| 30 | 6 | -4.005418 | -0.045732 | 0.399750  |
| 31 | 6 | -3.000138 | 0.588501  | -1.816366 |
| 32 | 6 | -2.692166 | -1.752098 | -0.936642 |
| 33 | 6 | -3.994300 | -2.195811 | -1.647458 |
| 34 | 1 | -2.516446 | -2.364196 | -0.042857 |
| 35 | 1 | -1.827448 | -1.883472 | -1.600129 |
| 36 | 6 | -5.197986 | -1.992568 | -0.694670 |
| 37 | 6 | -4.197953 | -1.344574 | -2.924407 |
| 38 | 1 | -3.914691 | -3.257584 | -1.919600 |
| 39 | 6 | -5.306202 | -0.496065 | -0.311177 |
| 40 | 1 | -5.072192 | -2.605977 | 0.209394  |
| 41 | 1 | -6.125726 | -2.323039 | -1.182528 |
| 42 | 6 | -5.512570 | 0.350280  | -1.590439 |
| 43 | 1 | -6.156536 | -0.350967 | 0.369757  |
| 44 | 1 | -4.077029 | 1.014069  | 0.676475  |
| 45 | 1 | -3.871883 | -0.615040 | 1.327230  |
| 46 | 6 | -4.301510 | 0.150248  | -2.532592 |
| 47 | 1 | -2.138959 | 0.471848  | -2.479508 |
| 48 | 1 | -3.055695 | 1.652623  | -1.547316 |
| 49 | 1 | -4.433154 | 0.758686  | -3.437715 |
| 50 | 1 | -6.441552 | 0.050723  | -2.095883 |
| 51 | 1 | -5.615090 | 1.412713  | -1.326847 |
| 52 | 1 | -3.356390 | -1.494790 | -3.614635 |
| 53 | 1 | -5.110495 | -1.661854 | -3.448757 |
| 54 | 6 | 3.799409  | -1.703649 | 0.672801  |
| 55 | 6 | 2.485247  | -1.674675 | -1.508387 |
| 56 | 6 | 3.417390  | 0.454110  | -0.521533 |
| 57 | 6 | 3.809071  | -1.875398 | -2.290339 |
| 58 | 1 | 2.033731  | -2.651963 | -1.300340 |
| 59 | 1 | 1.769949  | -1.099797 | -2.104146 |
| 60 | 6 | 4.809933  | -2.682510 | -1.427826 |
| 61 | 6 | 4.421113  | -0.496942 | -2.636826 |
| 62 | 1 | 3.590889  | -2.425591 | -3.215410 |
| 63 | 6 | 5.116646  | -1.902229 | -0.124963 |
| 64 | 1 | 5.739218  | -2.853248 | -1.988437 |
| 65 | 1 | 4.392078  | -3.671200 | -1.187804 |
| 66 | 6 | 5.739605  | -0.533713 | -0.478641 |
| 67 | 1 | 5.815146  | -2.480236 | 0.495420  |
| 68 | 1 | 3.995962  | -1.153817 | 1.604339  |
| 69 | 1 | 3.423799  | -2.690866 | 0.946189  |
| 70 | 6 | 4.726217  | 0.267369  | -1.326358 |
| 71 | 1 | 2.714464  | 1.055215  | -1.101057 |
| 72 | 1 | 3.632119  | 0.982536  | 0.413474  |
| 73 | 1 | 5.139157  | 1.257100  | -1.564291 |
| 74 | 1 | 5.988345  | 0.018334  | 0.438948  |
| 75 | 1 | 6.676165  | -0.677422 | -1.034933 |
| 76 | 1 | 5.343290  | -0.629534 | -3.219623 |
| 77 | 1 | 3.721545  | 0.079756  | -3.255524 |
| 78 | 6 | -2.384108 | 3.369182  | 1.438576  |
| 79 | 6 | -0.742878 | 4.315866  | -1.150086 |
| 80 | 6 | 2.311270  | 3.840565  | -0.619772 |
| 81 | 6 | 2.605182  | 2.536933  | 2.363009  |
| 82 | 6 | -0.253012 | 2.295825  | 3.577527  |

|    |   |           |          |           |
|----|---|-----------|----------|-----------|
| 83 | 1 | -2.552582 | 4.325059 | 1.955986  |
| 84 | 1 | -2.808562 | 2.578512 | 2.064906  |
| 85 | 1 | -2.953740 | 3.395255 | 0.505066  |
| 86 | 1 | -0.666282 | 5.405630 | -1.020617 |
| 87 | 1 | -1.799024 | 4.074913 | -1.306234 |
| 88 | 1 | -0.204368 | 4.041735 | -2.061243 |
| 89 | 1 | 2.340034  | 4.937985 | -0.672325 |
| 90 | 1 | 2.156209  | 3.463846 | -1.637188 |
| 91 | 1 | 3.293318  | 3.500219 | -0.279313 |
| 92 | 1 | 2.643707  | 3.187200 | 3.248204  |
| 93 | 1 | 3.494467  | 2.750219 | 1.763917  |
| 94 | 1 | 2.679357  | 1.501846 | 2.717005  |
| 95 | 1 | -0.047307 | 3.162787 | 4.223403  |
| 96 | 1 | 0.376396  | 1.471101 | 3.929921  |
| 97 | 1 | -1.296974 | 2.011084 | 3.734726  |

By B3LYP/def2-SVP

$10^{1-\text{Ad}}$  (E = -2899.1469483 a.u.)

| Center Number | Atomic Number | Coordinates (Angstroms) |           |           |
|---------------|---------------|-------------------------|-----------|-----------|
|               |               | X                       | Y         | Z         |
| 1             | 22            | -0.036284               | 1.199370  | 0.230315  |
| 2             | 7             | 1.519500                | 0.153455  | 0.145818  |
| 3             | 6             | 1.152469                | 0.006067  | 1.483612  |
| 4             | 7             | -1.472868               | -0.636113 | 0.566559  |
| 5             | 6             | 0.929851                | 3.165720  | 1.185010  |
| 6             | 6             | -0.004175               | 2.659016  | 2.145189  |
| 7             | 6             | 0.188930                | 3.608694  | 0.049193  |
| 8             | 17            | -0.397234               | 1.187580  | -2.155260 |
| 9             | 6             | -1.319759               | 2.803471  | 1.600495  |
| 10            | 6             | -1.200695               | 3.396013  | 0.308938  |
| 11            | 6             | 2.758720                | -0.247084 | -0.526588 |
| 12            | 6             | -0.843469               | -1.544925 | 1.227829  |
| 13            | 6             | -2.752061               | -0.910576 | -0.177528 |
| 14            | 6             | 0.382899                | -1.193318 | 2.041713  |
| 15            | 1             | 1.813484                | 0.451289  | 2.244007  |
| 16            | 6             | 1.041109                | -2.542395 | 2.316474  |
| 17            | 1             | -0.006403               | -0.827282 | 3.017816  |
| 18            | 6             | -1.049515               | -3.049725 | 1.329601  |
| 19            | 6             | 0.253743                | -3.558069 | 1.909362  |
| 20            | 1             | -1.882533               | -3.286013 | 2.017366  |
| 21            | 1             | -1.311621               | -3.509879 | 0.364254  |
| 22            | 6             | 0.477482                | -5.034303 | 2.031209  |
| 23            | 6             | 2.333395                | -2.627381 | 3.066392  |
| 24            | 1             | 2.629160                | -3.664405 | 3.278259  |
| 25            | 1             | 2.256946                | -2.092778 | 4.030423  |
| 26            | 1             | 3.156925                | -2.148072 | 2.513734  |
| 27            | 1             | 1.443109                | -5.278067 | 2.495764  |
| 28            | 1             | 0.448492                | -5.521589 | 1.040158  |
| 29            | 1             | -0.318104               | -5.509216 | 2.633671  |
| 30            | 6             | 3.001716                | 0.615601  | -1.786577 |
| 31            | 6             | 3.994806                | -0.099198 | 0.396007  |
| 32            | 6             | 2.648229                | -1.729327 | -0.976519 |
| 33            | 6             | 3.931941                | -2.178329 | -1.701692 |
| 34            | 1             | 1.772774                | -1.825658 | -1.639692 |
| 35            | 1             | 2.459942                | -2.368058 | -0.097991 |
| 36            | 6             | 4.148465                | -1.299844 | -2.948518 |
| 37            | 6             | 5.136601                | -2.028241 | -0.752302 |
| 38            | 1             | 3.827869                | -3.234901 | -2.004441 |
| 39            | 6             | 5.277541                | -0.552853 | -0.329175 |
| 40            | 1             | 6.060415                | -2.369394 | -1.251502 |
| 41            | 1             | 5.000662                | -2.667394 | 0.137882  |
| 42            | 6             | 5.496709                | 0.320893  | -1.578386 |
| 43            | 1             | 6.136481                | -0.444702 | 0.355886  |
| 44            | 1             | 3.853809                | -0.694476 | 1.311280  |



|    |   |           |           |           |
|----|---|-----------|-----------|-----------|
| 45 | 1 | 4.089560  | 0.952479  | 0.712087  |
| 46 | 6 | 4.284889  | 0.173161  | -2.516684 |
| 47 | 1 | 3.078139  | 1.675320  | -1.488704 |
| 48 | 1 | 2.131368  | 0.537886  | -2.451884 |
| 49 | 1 | 4.425943  | 0.807475  | -3.408650 |
| 50 | 1 | 5.623638  | 1.377490  | -1.284377 |
| 51 | 1 | 6.423860  | 0.019521  | -2.096944 |
| 52 | 1 | 3.299227  | -1.413303 | -3.643921 |
| 53 | 1 | 5.054008  | -1.623982 | -3.491086 |
| 54 | 6 | -3.788913 | -1.711511 | 0.654993  |
| 55 | 6 | -3.409077 | 0.449317  | -0.508859 |
| 56 | 6 | -2.473963 | -1.658773 | -1.507597 |
| 57 | 6 | -3.787384 | -1.849974 | -2.294176 |
| 58 | 1 | -1.749400 | -1.078834 | -2.096468 |
| 59 | 1 | -2.021175 | -2.642492 | -1.307178 |
| 60 | 6 | -4.395074 | -0.474644 | -2.627401 |
| 61 | 6 | -4.787011 | -2.663014 | -1.449266 |
| 62 | 1 | -3.562476 | -2.392442 | -3.228126 |
| 63 | 6 | -5.096959 | -1.900962 | -0.145349 |
| 64 | 1 | -5.717936 | -2.832123 | -2.017488 |
| 65 | 1 | -4.369852 | -3.659202 | -1.218766 |
| 66 | 6 | -5.717931 | -0.536236 | -0.484903 |
| 67 | 1 | -5.799282 | -2.489179 | 0.469881  |
| 68 | 1 | -3.413490 | -2.706428 | 0.918627  |
| 69 | 1 | -3.989430 | -1.177741 | 1.600283  |
| 70 | 6 | -4.707592 | 0.270835  | -1.316667 |
| 71 | 1 | -3.625875 | 0.974199  | 0.433027  |
| 72 | 1 | -2.701050 | 1.058461  | -1.082852 |
| 73 | 1 | -5.121020 | 1.267726  | -1.545849 |
| 74 | 1 | -6.659238 | -0.674415 | -1.044653 |
| 75 | 1 | -5.972101 | 0.008385  | 0.441162  |
| 76 | 1 | -5.315468 | -0.599465 | -3.224038 |
| 77 | 1 | -3.688923 | 0.112252  | -3.237516 |
| 78 | 6 | 0.283475  | 2.308908  | 3.577314  |
| 79 | 6 | 2.401619  | 3.359000  | 1.415759  |
| 80 | 6 | 0.740240  | 4.300550  | -1.164262 |
| 81 | 6 | -2.304339 | 3.836381  | -0.608614 |
| 82 | 6 | -2.580244 | 2.541765  | 2.379300  |
| 83 | 1 | 0.058594  | 3.168561  | 4.235544  |
| 84 | 1 | 1.338010  | 2.046495  | 3.738174  |
| 85 | 1 | -0.328806 | 1.466101  | 3.933374  |
| 86 | 1 | 2.593513  | 4.314901  | 1.936304  |
| 87 | 1 | 2.966782  | 3.383338  | 0.473384  |
| 88 | 1 | 2.830522  | 2.561183  | 2.039219  |
| 89 | 1 | 0.632256  | 5.396322  | -1.068040 |
| 90 | 1 | 0.217715  | 3.987831  | -2.078978 |
| 91 | 1 | 1.809945  | 4.089394  | -1.306993 |
| 92 | 1 | -2.341535 | 4.938373  | -0.670609 |
| 93 | 1 | -3.290830 | 3.493760  | -0.267105 |
| 94 | 1 | -2.148424 | 3.455890  | -1.630290 |
| 95 | 1 | -2.637871 | 3.210710  | 3.256156  |
| 96 | 1 | -2.634528 | 1.509763  | 2.761217  |
| 97 | 1 | -3.480984 | 2.721713  | 1.777094  |

By BP86/BS2

$10^{1-Ad}$  (E = -2109.1775863 a.u.)

| Center Number | Atomic Number | Coordinates (Angstroms) |           |          |
|---------------|---------------|-------------------------|-----------|----------|
|               |               | X                       | Y         | Z        |
| 1             | 22            | -0.070716               | 1.225691  | 0.207231 |
| 2             | 7             | 1.507177                | 0.185353  | 0.094659 |
| 3             | 6             | 1.163140                | 0.051095  | 1.451987 |
| 4             | 7             | -1.455954               | -0.627526 | 0.562994 |
| 5             | 6             | 0.868132                | 3.175944  | 1.195197 |
| 6             | 6             | -0.071879               | 2.639447  | 2.141170 |

|    |    |           |           |           |
|----|----|-----------|-----------|-----------|
| 7  | 6  | 0.130475  | 3.629494  | 0.055545  |
| 8  | 17 | -0.410468 | 1.254351  | -2.183508 |
| 9  | 6  | -1.388531 | 2.780170  | 1.585542  |
| 10 | 6  | -1.264206 | 3.396297  | 0.299339  |
| 11 | 6  | 2.785365  | -0.225395 | -0.553836 |
| 12 | 6  | -0.819864 | -1.532617 | 1.241349  |
| 13 | 6  | -2.758589 | -0.941298 | -0.179247 |
| 14 | 6  | 0.415638  | -1.158008 | 2.036136  |
| 15 | 1  | 1.841382  | 0.505082  | 2.193907  |
| 16 | 6  | 1.092733  | -2.500518 | 2.319125  |
| 17 | 1  | 0.038482  | -0.781855 | 3.016600  |
| 18 | 6  | -1.008924 | -3.043746 | 1.360175  |
| 19 | 6  | 0.311797  | -3.532095 | 1.928212  |
| 20 | 1  | -1.827571 | -3.282243 | 2.067436  |
| 21 | 1  | -1.280463 | -3.522191 | 0.404521  |
| 22 | 6  | 0.560425  | -5.016591 | 2.053983  |
| 23 | 6  | 2.401416  | -2.562119 | 3.065630  |
| 24 | 1  | 2.738844  | -3.600012 | 3.227879  |
| 25 | 1  | 2.304737  | -2.072730 | 4.056672  |
| 26 | 1  | 3.200012  | -2.021934 | 2.523650  |
| 27 | 1  | 1.546063  | -5.234429 | 2.499196  |
| 28 | 1  | 0.519547  | -5.509380 | 1.061385  |
| 29 | 1  | -0.213800 | -5.500747 | 2.683424  |
| 30 | 6  | 2.990898  | 0.548511  | -1.886296 |
| 31 | 6  | 4.016031  | 0.051376  | 0.362154  |
| 32 | 6  | 2.729120  | -1.752549 | -0.875533 |
| 33 | 6  | 4.044150  | -2.214646 | -1.569219 |
| 34 | 1  | 1.860206  | -1.938638 | -1.535284 |
| 35 | 1  | 2.565742  | -2.320451 | 0.060618  |
| 36 | 6  | 4.229164  | -1.428972 | -2.899208 |
| 37 | 6  | 5.253328  | -1.938693 | -0.630750 |
| 38 | 1  | 3.977197  | -3.301187 | -1.782899 |
| 39 | 6  | 5.331210  | -0.414677 | -0.328483 |
| 40 | 1  | 6.194231  | -2.279303 | -1.109587 |
| 41 | 1  | 5.140488  | -2.509403 | 0.314412  |
| 42 | 6  | 5.520961  | 0.369347  | -1.658666 |
| 43 | 1  | 6.185552  | -0.212219 | 0.349896  |
| 44 | 1  | 3.890547  | -0.474067 | 1.328442  |
| 45 | 1  | 4.068153  | 1.135897  | 0.579771  |
| 46 | 6  | 4.304863  | 0.093868  | -2.587285 |
| 47 | 1  | 3.027361  | 1.635845  | -1.671987 |
| 48 | 1  | 2.120972  | 0.376057  | -2.543820 |
| 49 | 1  | 4.420947  | 0.661032  | -3.533028 |
| 50 | 1  | 5.602876  | 1.456040  | -1.450235 |
| 51 | 1  | 6.462533  | 0.056493  | -2.155058 |
| 52 | 1  | 3.379297  | -1.634012 | -3.581073 |
| 53 | 1  | 5.155090  | -1.759853 | -3.412937 |
| 54 | 6  | -3.778254 | -1.757905 | 0.675400  |
| 55 | 6  | -3.440552 | 0.414849  | -0.518125 |
| 56 | 6  | -2.463628 | -1.703028 | -1.507105 |
| 57 | 6  | -3.788397 | -1.929264 | -2.297292 |
| 58 | 1  | -1.750192 | -1.113442 | -2.109271 |
| 59 | 1  | -1.994219 | -2.681437 | -1.290457 |
| 60 | 6  | -4.428740 | -0.556797 | -2.647631 |
| 61 | 6  | -4.780231 | -2.760052 | -1.434089 |
| 62 | 1  | -3.551087 | -2.480056 | -3.229428 |
| 63 | 6  | -5.100239 | -1.981712 | -0.124885 |
| 64 | 1  | -5.715083 | -2.946734 | -2.000373 |
| 65 | 1  | -4.339954 | -3.749569 | -1.192123 |
| 66 | 6  | -5.754393 | -0.619565 | -0.478653 |
| 67 | 1  | -5.790213 | -2.579179 | 0.505049  |
| 68 | 1  | -3.377909 | -2.748583 | 0.943827  |
| 69 | 1  | -3.987456 | -1.210279 | 1.616203  |
| 70 | 6  | -4.750370 | 0.203702  | -1.330533 |

|    |   |           |           |           |
|----|---|-----------|-----------|-----------|
| 71 | 1 | -3.671408 | 0.937751  | 0.427874  |
| 72 | 1 | -2.739183 | 1.037719  | -1.097938 |
| 73 | 1 | -5.183013 | 1.196193  | -1.568932 |
| 74 | 1 | -6.696692 | -0.782846 | -1.040005 |
| 75 | 1 | -6.012338 | -0.067453 | 0.448276  |
| 76 | 1 | -5.356293 | -0.708479 | -3.236326 |
| 77 | 1 | -3.731758 | 0.038511  | -3.269547 |
| 78 | 6 | 0.212312  | 2.280211  | 3.583164  |
| 79 | 6 | 2.343334  | 3.392342  | 1.448789  |
| 80 | 6 | 0.694836  | 4.348187  | -1.149703 |
| 81 | 6 | -2.375455 | 3.837455  | -0.626244 |
| 82 | 6 | -2.664865 | 2.516173  | 2.359263  |
| 83 | 1 | 0.004111  | 3.150042  | 4.240832  |
| 84 | 1 | 1.267099  | 1.994001  | 3.735841  |
| 85 | 1 | -0.420904 | 1.444262  | 3.932612  |
| 86 | 1 | 2.505682  | 4.341230  | 2.000429  |
| 87 | 1 | 2.913724  | 3.452367  | 0.505978  |
| 88 | 1 | 2.778455  | 2.578175  | 2.055052  |
| 89 | 1 | 0.626570  | 5.446800  | -1.008124 |
| 90 | 1 | 0.144895  | 4.083818  | -2.069023 |
| 91 | 1 | 1.757284  | 4.096350  | -1.313611 |
| 92 | 1 | -2.448101 | 4.944147  | -0.642711 |
| 93 | 1 | -3.355847 | 3.441522  | -0.310146 |
| 94 | 1 | -2.186726 | 3.497739  | -1.662379 |
| 95 | 1 | -2.730866 | 3.201976  | 3.228163  |
| 96 | 1 | -2.715300 | 1.483629  | 2.751600  |
| 97 | 1 | -3.559801 | 2.686791  | 1.737467  |

By BP86/LANL2DZ

$10^{1-Ad}$  (E = -1663.7923218 a.u.)

| Center Number | Atomic Number | Coordinates (Angstroms) |           |           |
|---------------|---------------|-------------------------|-----------|-----------|
|               |               | X                       | Y         | Z         |
| 1             | 22            | -0.081882               | 1.200414  | 0.245863  |
| 2             | 7             | 1.503807                | 0.195554  | 0.126912  |
| 3             | 6             | 1.162416                | 0.056842  | 1.512999  |
| 4             | 7             | -1.423741               | -0.625645 | 0.588713  |
| 5             | 6             | 0.819006                | 3.186284  | 1.240011  |
| 6             | 6             | -0.129741               | 2.636524  | 2.192889  |
| 7             | 6             | 0.073496                | 3.634666  | 0.086004  |
| 8             | 17            | -0.410783               | 1.244914  | -2.197107 |
| 9             | 6             | -1.457869               | 2.756104  | 1.622962  |
| 10            | 6             | -1.332451               | 3.376096  | 0.323553  |
| 11            | 6             | 2.768617                | -0.196457 | -0.559103 |
| 12            | 6             | -0.801552               | -1.545176 | 1.299563  |
| 13            | 6             | -2.713295               | -0.938313 | -0.191230 |
| 14            | 6             | 0.435995                | -1.168837 | 2.108328  |
| 15            | 1             | 1.834404                | 0.537797  | 2.246051  |
| 16            | 6             | 1.123536                | -2.521949 | 2.376422  |
| 17            | 1             | 0.071258                | -0.787567 | 3.095189  |
| 18            | 6             | -1.007388               | -3.064330 | 1.418782  |
| 19            | 6             | 0.326487                | -3.562154 | 1.986568  |
| 20            | 1             | -1.829973               | -3.302787 | 2.127225  |
| 21            | 1             | -1.273431               | -3.537928 | 0.455291  |
| 22            | 6             | 0.576215                | -5.049359 | 2.104187  |
| 23            | 6             | 2.453902                | -2.585457 | 3.089305  |
| 24            | 1             | 2.758663                | -3.622174 | 3.319129  |
| 25            | 1             | 2.412292                | -2.021068 | 4.044200  |
| 26            | 1             | 3.257654                | -2.121234 | 2.485115  |
| 27            | 1             | 1.549915                | -5.275153 | 2.574482  |
| 28            | 1             | 0.563679                | -5.534589 | 1.106136  |
| 29            | 1             | -0.215007               | -5.542664 | 2.706635  |
| 30            | 6             | 2.975796                | 0.648099  | -1.852387 |
| 31            | 6             | 4.010797                | 0.016903  | 0.367715  |
| 32            | 6             | 2.686481                | -1.709428 | -0.961729 |

|    |   |           |           |           |
|----|---|-----------|-----------|-----------|
| 33 | 6 | 3.992394  | -2.148040 | -1.690127 |
| 34 | 1 | 1.806659  | -1.848389 | -1.622156 |
| 35 | 1 | 2.524100  | -2.326116 | -0.054365 |
| 36 | 6 | 4.179827  | -1.290828 | -2.977358 |
| 37 | 6 | 5.210944  | -1.937127 | -0.741792 |
| 38 | 1 | 3.914235  | -3.221220 | -1.963437 |
| 39 | 6 | 5.315695  | -0.430043 | -0.358424 |
| 40 | 1 | 6.145605  | -2.266890 | -1.242007 |
| 41 | 1 | 5.090738  | -2.555102 | 0.173527  |
| 42 | 6 | 5.507582  | 0.421818  | -1.648172 |
| 43 | 1 | 6.179613  | -0.278476 | 0.322300  |
| 44 | 1 | 3.883642  | -0.559493 | 1.305754  |
| 45 | 1 | 4.078897  | 1.088802  | 0.645783  |
| 46 | 6 | 4.280577  | 0.214207  | -2.584579 |
| 47 | 1 | 3.025804  | 1.723514  | -1.579482 |
| 48 | 1 | 2.098017  | 0.526510  | -2.512330 |
| 49 | 1 | 4.400564  | 0.829046  | -3.500371 |
| 50 | 1 | 5.606836  | 1.495748  | -1.383132 |
| 51 | 1 | 6.442143  | 0.122068  | -2.167778 |
| 52 | 1 | 3.321882  | -1.446033 | -3.664157 |
| 53 | 1 | 5.098181  | -1.606548 | -3.516201 |
| 54 | 6 | -3.753897 | -1.755245 | 0.646734  |
| 55 | 6 | -3.390941 | 0.414685  | -0.561985 |
| 56 | 6 | -2.368759 | -1.711947 | -1.507412 |
| 57 | 6 | -3.670105 | -1.956107 | -2.331882 |
| 58 | 1 | -1.643613 | -1.115929 | -2.092465 |
| 59 | 1 | -1.894072 | -2.685596 | -1.273250 |
| 60 | 6 | -4.307613 | -0.587710 | -2.713009 |
| 61 | 6 | -4.681651 | -2.786424 | -1.486312 |
| 62 | 1 | -3.404979 | -2.514268 | -3.253026 |
| 63 | 6 | -5.049314 | -1.996085 | -0.193516 |
| 64 | 1 | -5.598231 | -2.988372 | -2.078287 |
| 65 | 1 | -4.239092 | -3.769698 | -1.219587 |
| 66 | 6 | -5.700865 | -0.639360 | -0.582557 |
| 67 | 1 | -5.757237 | -2.592047 | 0.418966  |
| 68 | 1 | -3.357909 | -2.742156 | 0.938235  |
| 69 | 1 | -3.995382 | -1.199366 | 1.577340  |
| 70 | 6 | -4.675447 | 0.184769  | -1.411556 |
| 71 | 1 | -3.650904 | 0.950719  | 0.370556  |
| 72 | 1 | -2.677351 | 1.035278  | -1.131363 |
| 73 | 1 | -5.108597 | 1.171509  | -1.674359 |
| 74 | 1 | -6.623790 | -0.815811 | -1.173291 |
| 75 | 1 | -5.994067 | -0.079490 | 0.330490  |
| 76 | 1 | -5.216551 | -0.748532 | -3.329585 |
| 77 | 1 | -3.593200 | 0.006235  | -3.317639 |
| 78 | 6 | 0.153440  | 2.275670  | 3.634771  |
| 79 | 6 | 2.294103  | 3.408094  | 1.495024  |
| 80 | 6 | 0.632521  | 4.360430  | -1.118159 |
| 81 | 6 | -2.441457 | 3.794248  | -0.616642 |
| 82 | 6 | -2.735121 | 2.448230  | 2.381097  |
| 83 | 1 | -0.039688 | 3.148693  | 4.293682  |
| 84 | 1 | 1.205257  | 1.974707  | 3.788368  |
| 85 | 1 | -0.492631 | 1.450399  | 3.989878  |
| 86 | 1 | 2.453621  | 4.337497  | 2.080801  |
| 87 | 1 | 2.861031  | 3.509667  | 0.551815  |
| 88 | 1 | 2.742710  | 2.576457  | 2.070193  |
| 89 | 1 | 0.534667  | 5.458791  | -0.987663 |
| 90 | 1 | 0.098570  | 4.074129  | -2.041301 |
| 91 | 1 | 1.704233  | 4.137081  | -1.271861 |
| 92 | 1 | -2.507059 | 4.900264  | -0.669667 |
| 93 | 1 | -3.426952 | 3.417014  | -0.290749 |
| 94 | 1 | -2.253245 | 3.421764  | -1.642599 |
| 95 | 1 | -2.796230 | 3.070659  | 3.297124  |
| 96 | 1 | -2.793809 | 1.389448  | 2.700941  |

| 97                                   | 1             | -3.631788               | 2.669160  | 1.775466  |
|--------------------------------------|---------------|-------------------------|-----------|-----------|
| By B3LYP/BS3                         |               |                         |           |           |
| $10^{1-Ad}$ (E = -2109.0121412 a.u.) |               |                         |           |           |
| Center Number                        | Atomic Number | Coordinates (Angstroms) |           |           |
|                                      |               | X                       | Y         | Z         |
| 1                                    | 22            | -0.031903               | 1.199125  | 0.222067  |
| 2                                    | 7             | 1.513890                | 0.143227  | 0.122866  |
| 3                                    | 6             | 1.151131                | 0.002649  | 1.463901  |
| 4                                    | 7             | -1.470949               | -0.627974 | 0.554586  |
| 5                                    | 6             | 0.917581                | 3.155684  | 1.189408  |
| 6                                    | 6             | -0.016089               | 2.637314  | 2.138641  |
| 7                                    | 6             | 0.181664                | 3.605184  | 0.058879  |
| 8                                    | 17            | -0.390842               | 1.207758  | -2.184449 |
| 9                                    | 6             | -1.326479               | 2.785864  | 1.593287  |
| 10                                   | 6             | -1.204832               | 3.387241  | 0.310785  |
| 11                                   | 6             | -0.849229               | -1.539950 | 1.212898  |
| 12                                   | 6             | 0.380671                | -1.194663 | 2.023784  |
| 13                                   | 1             | 1.816698                | 0.437762  | 2.212910  |
| 14                                   | 6             | 1.035280                | -2.546530 | 2.288032  |
| 15                                   | 1             | 0.001906                | -0.834216 | 2.997669  |
| 16                                   | 6             | -1.059037               | -3.044963 | 1.315308  |
| 17                                   | 6             | 0.248450                | -3.553304 | 1.884263  |
| 18                                   | 1             | -1.876603               | -3.279509 | 2.008539  |
| 19                                   | 1             | -1.323240               | -3.501466 | 0.358911  |
| 20                                   | 6             | 0.470661                | -5.037670 | 1.995777  |
| 21                                   | 6             | 2.335224                | -2.636845 | 3.037883  |
| 22                                   | 1             | 2.618727                | -3.672451 | 3.247737  |
| 23                                   | 1             | 2.260132                | -2.105241 | 3.997698  |
| 24                                   | 1             | 3.155348                | -2.168787 | 2.482349  |
| 25                                   | 1             | 1.434284                | -5.279423 | 2.453245  |
| 26                                   | 1             | 0.441207                | -5.511965 | 1.004522  |
| 27                                   | 1             | -0.318386               | -5.510618 | 2.598302  |
| 28                                   | 6             | 0.268233                | 2.285505  | 3.577388  |
| 29                                   | 6             | 2.391104                | 3.366078  | 1.433256  |
| 30                                   | 6             | 0.740829                | 4.316690  | -1.147017 |
| 31                                   | 6             | -2.312971               | 3.840939  | -0.604928 |
| 32                                   | 6             | -2.593873               | 2.526615  | 2.374061  |
| 33                                   | 1             | 0.059984                | 3.149798  | 4.225983  |
| 34                                   | 1             | 1.313883                | 2.005370  | 3.731609  |
| 35                                   | 1             | -0.356458               | 1.456939  | 3.929141  |
| 36                                   | 1             | 2.560202                | 4.321046  | 1.952118  |
| 37                                   | 1             | 2.957137                | 3.395173  | 0.497654  |
| 38                                   | 1             | 2.818903                | 2.574689  | 2.056329  |
| 39                                   | 1             | 0.682727                | 5.406276  | -1.006625 |
| 40                                   | 1             | 0.187026                | 4.060060  | -2.054134 |
| 41                                   | 1             | 1.791021                | 4.060958  | -1.319113 |
| 42                                   | 1             | -2.350824               | 4.938751  | -0.641955 |
| 43                                   | 1             | -3.291974               | 3.487813  | -0.268911 |
| 44                                   | 1             | -2.156446               | 3.480590  | -1.628106 |
| 45                                   | 1             | -2.631103               | 3.177439  | 3.258913  |
| 46                                   | 1             | -2.663788               | 1.491615  | 2.729143  |
| 47                                   | 1             | -3.485869               | 2.736960  | 1.778030  |
| 48                                   | 6             | 2.780157                | -0.251401 | -0.532203 |
| 49                                   | 6             | 3.009505                | 0.585304  | -1.818099 |
| 50                                   | 6             | 4.005137                | -0.045081 | 0.403460  |
| 51                                   | 6             | 2.699263                | -1.754032 | -0.937138 |
| 52                                   | 6             | 4.315187                | 0.147752  | -2.527204 |
| 53                                   | 1             | 2.152871                | 0.465186  | -2.486587 |
| 54                                   | 1             | 3.061440                | 1.650075  | -1.550820 |
| 55                                   | 6             | 5.309577                | -0.495536 | -0.300511 |
| 56                                   | 1             | 4.074735                | 1.015201  | 0.678627  |
| 57                                   | 1             | 3.867730                | -0.612847 | 1.331319  |
| 58                                   | 6             | 4.005173                | -2.197550 | -1.641221 |

|    |   |           |           |           |
|----|---|-----------|-----------|-----------|
| 59 | 1 | 2.519743  | -2.365594 | -0.043786 |
| 60 | 1 | 1.837724  | -1.886642 | -1.604472 |
| 61 | 6 | 4.214856  | -1.347571 | -2.918001 |
| 62 | 6 | 5.521526  | 0.349710  | -1.579549 |
| 63 | 1 | 4.450539  | 0.755348  | -3.432308 |
| 64 | 6 | 5.204092  | -1.992537 | -0.682797 |
| 65 | 1 | 6.156461  | -0.349167 | 0.384435  |
| 66 | 1 | 3.927610  | -3.259690 | -1.912599 |
| 67 | 1 | 5.130545  | -1.664632 | -3.436978 |
| 68 | 1 | 3.377343  | -1.499263 | -3.612799 |
| 69 | 1 | 6.453078  | 0.050310  | -2.080295 |
| 70 | 1 | 5.622106  | 1.412486  | -1.316480 |
| 71 | 1 | 6.134352  | -2.323004 | -1.165799 |
| 72 | 1 | 5.074323  | -2.604990 | 0.221355  |
| 73 | 6 | -2.770850 | -0.908003 | -0.185011 |
| 74 | 6 | -2.501065 | -1.672958 | -1.512908 |
| 75 | 6 | -3.803758 | -1.697048 | 0.674215  |
| 76 | 6 | -3.422203 | 0.459587  | -0.521508 |
| 77 | 6 | -3.829528 | -1.869336 | -2.288189 |
| 78 | 1 | -1.786425 | -1.102989 | -2.114023 |
| 79 | 1 | -2.052581 | -2.651793 | -1.305790 |
| 80 | 6 | -5.125951 | -1.891758 | -0.116260 |
| 81 | 1 | -3.429450 | -2.685474 | 0.944879  |
| 82 | 1 | -3.993464 | -1.147219 | 1.607164  |
| 83 | 6 | -4.735406 | 0.276467  | -1.319961 |
| 84 | 1 | -3.631141 | 0.987528  | 0.415061  |
| 85 | 1 | -2.721584 | 1.060949  | -1.103353 |
| 86 | 6 | -4.439060 | -0.489033 | -2.631691 |
| 87 | 6 | -4.828549 | -2.673192 | -1.420560 |
| 88 | 1 | -3.617647 | -2.420195 | -3.214274 |
| 89 | 6 | -5.746773 | -0.521540 | -0.466908 |
| 90 | 1 | -5.822722 | -2.467574 | 0.508068  |
| 91 | 1 | -5.146793 | 1.267285  | -1.556039 |
| 92 | 1 | -5.364608 | -0.619072 | -3.209694 |
| 93 | 1 | -3.741232 | 0.085621  | -3.254449 |
| 94 | 1 | -5.761223 | -2.840871 | -1.976407 |
| 95 | 1 | -4.412734 | -3.663240 | -1.182623 |
| 96 | 1 | -6.686507 | -0.662619 | -1.018452 |
| 97 | 1 | -5.989278 | 0.031419  | 0.451822  |

By B3LYP/BS4

$10^{1-Ad}$  (E = -2900.3828701 a.u.)

| Center Number | Atomic Number | Coordinates (Angstroms) |           |           |
|---------------|---------------|-------------------------|-----------|-----------|
|               |               | X                       | Y         | Z         |
| 1             | 22            | -0.034850               | 1.199794  | 0.209716  |
| 2             | 7             | 1.522321                | 0.132175  | 0.122543  |
| 3             | 6             | 1.151986                | -0.006945 | 1.462147  |
| 4             | 7             | -1.478356               | -0.636046 | 0.551724  |
| 5             | 6             | 0.915915                | 3.175352  | 1.184416  |
| 6             | 6             | -0.021996               | 2.666244  | 2.134063  |
| 7             | 6             | 0.185023                | 3.619838  | 0.047751  |
| 8             | 17            | -0.393225               | 1.194979  | -2.193819 |
| 9             | 6             | -1.330214               | 2.814397  | 1.583287  |
| 10            | 6             | -1.202926               | 3.406454  | 0.296670  |
| 11            | 6             | -0.853468               | -1.548237 | 1.207438  |
| 12            | 6             | 0.377620                | -1.203971 | 2.019190  |
| 13            | 1             | 1.810369                | 0.432448  | 2.215420  |
| 14            | 6             | 1.032368                | -2.556538 | 2.279970  |
| 15            | 1             | -0.001218               | -0.845362 | 2.993782  |
| 16            | 6             | -1.060286               | -3.054316 | 1.303570  |
| 17            | 6             | 0.247548                | -3.562840 | 1.871427  |
| 18            | 1             | -1.878299               | -3.294350 | 1.994273  |
| 19            | 1             | -1.322176               | -3.506429 | 0.344382  |
| 20            | 6             | 0.471617                | -5.047344 | 1.977348  |

|    |   |           |           |           |
|----|---|-----------|-----------|-----------|
| 21 | 6 | 2.331501  | -2.647536 | 3.031149  |
| 22 | 1 | 2.621812  | -3.683705 | 3.228514  |
| 23 | 1 | 2.250924  | -2.128624 | 3.997488  |
| 24 | 1 | 3.149172  | -2.166570 | 2.483099  |
| 25 | 1 | 1.435648  | -5.289560 | 2.433718  |
| 26 | 1 | 0.442479  | -5.518032 | 0.984366  |
| 27 | 1 | -0.316633 | -5.523480 | 2.578421  |
| 28 | 6 | 0.259300  | 2.314215  | 3.573898  |
| 29 | 6 | 2.390053  | 3.381382  | 1.432246  |
| 30 | 6 | 0.750247  | 4.323275  | -1.161037 |
| 31 | 6 | -2.308590 | 3.855295  | -0.625627 |
| 32 | 6 | -2.601861 | 2.565771  | 2.361292  |
| 33 | 1 | 0.064091  | 3.182092  | 4.221606  |
| 34 | 1 | 1.301155  | 2.019292  | 3.726945  |
| 35 | 1 | -0.376027 | 1.494695  | 3.928023  |
| 36 | 1 | 2.561803  | 4.336729  | 1.949322  |
| 37 | 1 | 2.959122  | 3.405793  | 0.498271  |
| 38 | 1 | 2.813048  | 2.589614  | 2.058255  |
| 39 | 1 | 0.687434  | 5.413783  | -1.032379 |
| 40 | 1 | 0.204440  | 4.055890  | -2.070120 |
| 41 | 1 | 1.802569  | 4.069440  | -1.323024 |
| 42 | 1 | -2.351003 | 4.952623  | -0.665901 |
| 43 | 1 | -3.287671 | 3.498594  | -0.293166 |
| 44 | 1 | -2.147115 | 3.492688  | -1.647308 |
| 45 | 1 | -2.647819 | 3.233957  | 3.232656  |
| 46 | 1 | -2.670099 | 1.537874  | 2.736768  |
| 47 | 1 | -3.490775 | 2.760039  | 1.755218  |
| 48 | 6 | 2.794651  | -0.260703 | -0.525615 |
| 49 | 6 | 3.019292  | 0.567521  | -1.817684 |
| 50 | 6 | 4.015728  | -0.036351 | 0.411042  |
| 51 | 6 | 2.728215  | -1.767393 | -0.918505 |
| 52 | 6 | 4.330104  | 0.135880  | -2.521030 |
| 53 | 1 | 2.164660  | 0.435477  | -2.486967 |
| 54 | 1 | 3.062347  | 1.634783  | -1.558759 |
| 55 | 6 | 5.325739  | -0.480532 | -0.286892 |
| 56 | 1 | 4.075490  | 1.026629  | 0.678211  |
| 57 | 1 | 3.881123  | -0.598187 | 1.343088  |
| 58 | 6 | 4.039686  | -2.204734 | -1.616576 |
| 59 | 1 | 2.552843  | -2.373520 | -0.020732 |
| 60 | 1 | 1.869618  | -1.914795 | -1.586515 |
| 61 | 6 | 4.244087  | -1.363355 | -2.899830 |
| 62 | 6 | 5.532418  | 0.356424  | -1.572315 |
| 63 | 1 | 4.461849  | 0.737420  | -3.430623 |
| 64 | 6 | 5.234758  | -1.981361 | -0.657510 |
| 65 | 1 | 6.169873  | -0.320880 | 0.398480  |
| 66 | 1 | 3.971926  | -3.269679 | -1.879354 |
| 67 | 1 | 5.163580  | -1.676299 | -3.414618 |
| 68 | 1 | 3.409418  | -1.528399 | -3.594897 |
| 69 | 1 | 6.467800  | 0.061724  | -2.068729 |
| 70 | 1 | 5.622756  | 1.422054  | -1.317595 |
| 71 | 1 | 6.168985  | -2.307212 | -1.136024 |
| 72 | 1 | 5.108751  | -2.587846 | 0.251184  |
| 73 | 6 | -2.781829 | -0.915841 | -0.183144 |
| 74 | 6 | -2.520441 | -1.677514 | -1.514807 |
| 75 | 6 | -3.809674 | -1.706458 | 0.680643  |
| 76 | 6 | -3.435389 | 0.452560  | -0.513721 |
| 77 | 6 | -3.854220 | -1.872387 | -2.281737 |
| 78 | 1 | -1.810096 | -1.105950 | -2.119813 |
| 79 | 1 | -2.070298 | -2.656719 | -1.313204 |
| 80 | 6 | -5.136761 | -1.899977 | -0.101655 |
| 81 | 1 | -3.433424 | -2.695318 | 0.946798  |
| 82 | 1 | -3.993699 | -1.158647 | 1.615838  |
| 83 | 6 | -4.754471 | 0.270878  | -1.302841 |
| 84 | 1 | -3.636374 | 0.980690  | 0.424604  |

|    |   |           |           |           |
|----|---|-----------|-----------|-----------|
| 85 | 1 | -2.740487 | 1.054173  | -1.102356 |
| 86 | 6 | -4.466751 | -0.491683 | -2.618132 |
| 87 | 6 | -4.847397 | -2.678472 | -1.409483 |
| 88 | 1 | -3.648144 | -2.421033 | -3.210334 |
| 89 | 6 | -5.759972 | -0.529026 | -0.444832 |
| 90 | 1 | -5.829257 | -2.477410 | 0.525935  |
| 91 | 1 | -5.167400 | 1.262143  | -1.533936 |
| 92 | 1 | -5.396173 | -0.620993 | -3.189992 |
| 93 | 1 | -3.773808 | 0.084660  | -3.244732 |
| 94 | 1 | -5.783504 | -2.845335 | -1.959769 |
| 95 | 1 | -4.429757 | -3.668865 | -1.176257 |
| 96 | 1 | -6.703349 | -0.668612 | -0.990483 |
| 97 | 1 | -5.996399 | 0.021667  | 0.476766  |

By B3LYP/BS1

**M1a** (E = -697.941082 a.u.)

| Center Number | Atomic Number | Coordinates (Angstroms) |           |           |
|---------------|---------------|-------------------------|-----------|-----------|
|               |               | X                       | Y         | Z         |
| 1             | 22            | 0.297529                | 0.029112  | 0.003551  |
| 2             | 6             | -1.807569               | 0.872691  | 0.719875  |
| 3             | 6             | -1.734119               | -0.479638 | 1.157761  |
| 4             | 6             | -1.803312               | 0.878015  | -0.707358 |
| 5             | 17            | 1.105643                | 2.224380  | 0.093527  |
| 6             | 6             | -1.687569               | -1.307960 | -0.000904 |
| 7             | 6             | -1.731772               | -0.471639 | -1.154354 |
| 8             | 6             | 1.257483                | -1.347472 | 1.347512  |
| 9             | 6             | 2.400562                | -0.789971 | 0.652963  |
| 10            | 1             | 0.869144                | -2.305378 | 1.002719  |
| 11            | 6             | 1.244740                | -1.205672 | -1.478571 |
| 12            | 6             | 2.395158                | -0.721359 | -0.741931 |
| 13            | 1             | 0.858374                | -2.193611 | -1.228562 |
| 14            | 1             | 1.234698                | -1.014635 | -2.546721 |
| 15            | 6             | 3.482645                | 0.037103  | -1.480282 |
| 16            | 6             | 3.493139                | -0.106949 | 1.454360  |
| 17            | 1             | 3.665978                | 0.924024  | 1.129785  |
| 18            | 1             | 4.439087                | -0.655092 | 1.343396  |
| 19            | 1             | 3.239560                | -0.091451 | 2.518309  |
| 20            | 1             | 3.632372                | 1.044748  | -1.079135 |
| 21            | 1             | 3.238232                | 0.126130  | -2.542720 |
| 22            | 1             | 4.437828                | -0.499789 | -1.399437 |
| 23            | 6             | -1.845324               | -0.953562 | 2.585444  |
| 24            | 6             | -1.990822               | 2.080946  | 1.602707  |
| 25            | 6             | -1.969835               | 2.094938  | -1.581949 |
| 26            | 6             | -1.855136               | -0.940660 | -2.582344 |
| 27            | 6             | -1.738386               | -2.815142 | -0.009613 |
| 28            | 1             | -2.900531               | -1.076514 | 2.868508  |
| 29            | 1             | -1.398492               | -0.240168 | 3.285181  |
| 30            | 1             | -1.350052               | -1.918133 | 2.733544  |
| 31            | 1             | -3.060718               | 2.298914  | 1.731868  |
| 32            | 1             | -1.513801               | 2.966484  | 1.174499  |
| 33            | 1             | -1.563486               | 1.925062  | 2.598419  |
| 34            | 1             | -3.035984               | 2.330793  | -1.710286 |
| 35            | 1             | -1.544780               | 1.939059  | -2.578736 |
| 36            | 1             | -1.479889               | 2.970429  | -1.147096 |
| 37            | 1             | -2.912500               | -1.079450 | -2.849772 |
| 38            | 1             | -1.347622               | -1.897121 | -2.742300 |
| 39            | 1             | -1.430163               | -0.217415 | -3.285321 |
| 40            | 1             | -2.781182               | -3.158002 | -0.068979 |
| 41            | 1             | -1.307092               | -3.246048 | 0.899380  |
| 42            | 1             | -1.209684               | -3.241863 | -0.868529 |
| 43            | 1             | 1.256946                | -1.264091 | 2.429436  |

**TSM1a-1b** (E = -697.9123803 a.u.)

| Center Number | Atomic Number | Coordinates (Angstroms) |   |   |
|---------------|---------------|-------------------------|---|---|
|               |               | X                       | Y | Z |



|    |    |           |           |           |
|----|----|-----------|-----------|-----------|
| 1  | 22 | -0.441026 | -0.974421 | -0.097242 |
| 2  | 6  | -2.581739 | -1.920780 | -0.513619 |
| 3  | 6  | -2.121401 | -2.405530 | 0.743391  |
| 4  | 6  | -1.704297 | -2.418312 | -1.521519 |
| 5  | 17 | -1.296329 | 1.138710  | 0.090158  |
| 6  | 6  | -0.968550 | -3.213929 | 0.513076  |
| 7  | 6  | -0.712106 | -3.219963 | -0.889441 |
| 8  | 6  | 1.053075  | -1.129934 | 1.366574  |
| 9  | 6  | 2.388247  | -1.071438 | 0.647309  |
| 10 | 1  | 1.028129  | -1.933404 | 2.105616  |
| 11 | 6  | 1.133234  | -0.858274 | -1.482696 |
| 12 | 6  | 2.425834  | -0.940932 | -0.693518 |
| 13 | 1  | 1.145167  | -1.532867 | -2.342588 |
| 14 | 1  | 0.997615  | 0.159542  | -1.888087 |
| 15 | 6  | 3.684893  | -0.825998 | -1.532203 |
| 16 | 6  | 3.598867  | -1.128672 | 1.560085  |
| 17 | 1  | 4.552694  | -1.086000 | 1.027036  |
| 18 | 1  | 3.584930  | -2.053216 | 2.154748  |
| 19 | 1  | 3.574098  | -0.294257 | 2.275810  |
| 20 | 1  | 3.690509  | 0.128472  | -2.078200 |
| 21 | 1  | 3.712309  | -1.621683 | -2.290436 |
| 22 | 1  | 4.608166  | -0.884989 | -0.949210 |
| 23 | 6  | -2.769935 | -2.152497 | 2.082016  |
| 24 | 6  | -3.831167 | -1.110996 | -0.752152 |
| 25 | 6  | -1.849003 | -2.170431 | -3.002033 |
| 26 | 6  | 0.343497  | -4.056753 | -1.563644 |
| 27 | 6  | -0.282387 | -4.098710 | 1.520288  |
| 28 | 1  | -3.514658 | -2.930504 | 2.301372  |
| 29 | 1  | -3.284412 | -1.187060 | 2.106626  |
| 30 | 1  | -2.037273 | -2.161635 | 2.895530  |
| 31 | 1  | -4.685220 | -1.780423 | -0.927416 |
| 32 | 1  | -3.734467 | -0.459739 | -1.625812 |
| 33 | 1  | -4.073122 | -0.475435 | 0.103876  |
| 34 | 1  | -2.562354 | -2.881659 | -3.441530 |
| 35 | 1  | -0.897899 | -2.288307 | -3.528936 |
| 36 | 1  | -2.223254 | -1.162565 | -3.210536 |
| 37 | 1  | 0.061018  | -5.118303 | -1.531407 |
| 38 | 1  | 1.316906  | -3.957011 | -1.071477 |
| 39 | 1  | 0.469300  | -3.782804 | -2.614466 |
| 40 | 1  | -0.719583 | -5.107094 | 1.491667  |
| 41 | 1  | -0.395194 | -3.721475 | 2.541068  |
| 42 | 1  | 0.788114  | -4.196561 | 1.313881  |
| 43 | 1  | 0.881803  | -0.190608 | 1.921975  |

**M1b** (E = -697.9317757 a.u.)

| Center Number | Atomic Number | Coordinates (Angstroms) |           |           |
|---------------|---------------|-------------------------|-----------|-----------|
|               |               | X                       | Y         | Z         |
| 1             | 22            | -1.182855               | -0.939098 | -0.949716 |
| 2             | 6             | 1.088193                | -1.590767 | -0.779217 |
| 3             | 6             | 0.718867                | -1.030945 | 0.481562  |
| 4             | 6             | 1.040872                | -0.544932 | -1.750402 |
| 5             | 17            | -1.968147               | -0.112817 | -3.010048 |
| 6             | 6             | 0.387952                | 0.343019  | 0.275478  |
| 7             | 6             | 0.610900                | 0.642313  | -1.102853 |
| 8             | 6             | -2.099647               | -2.864047 | -1.219294 |
| 9             | 6             | -2.172304               | -2.764176 | 0.214846  |
| 10            | 1             | -2.910819               | -2.438659 | -1.809657 |
| 11            | 6             | -2.984629               | -0.417114 | 0.098987  |
| 12            | 6             | -2.600160               | -1.581853 | 0.851807  |
| 13            | 1             | -3.589558               | -0.555871 | -0.796727 |
| 14            | 1             | -3.251343               | 0.474907  | 0.652855  |
| 15            | 6             | -2.588355               | -1.435033 | 2.365421  |
| 16            | 6             | -1.674617               | -3.966370 | 1.001721  |
| 17            | 1             | -2.514823               | -4.658312 | 1.154876  |
| 18            | 1             | -1.265945               | -3.727278 | 1.984627  |

|    |   |           |           |           |
|----|---|-----------|-----------|-----------|
| 19 | 1 | -0.912581 | -4.510019 | 0.433903  |
| 20 | 1 | -3.574818 | -1.723688 | 2.755003  |
| 21 | 1 | -2.425455 | -0.390333 | 2.649325  |
| 22 | 1 | -1.844365 | -2.049446 | 2.874810  |
| 23 | 6 | 0.930961  | -1.686000 | 1.822253  |
| 24 | 6 | 1.634008  | -2.978285 | -1.014812 |
| 25 | 6 | 1.433338  | -0.682511 | -3.198063 |
| 26 | 6 | 0.458303  | 2.000633  | -1.735722 |
| 27 | 6 | 0.063293  | 1.353587  | 1.348766  |
| 28 | 1 | 1.962581  | -1.502386 | 2.155741  |
| 29 | 1 | 0.791139  | -2.768907 | 1.782040  |
| 30 | 1 | 0.265844  | -1.283584 | 2.589991  |
| 31 | 1 | 2.732089  | -2.973671 | -0.956923 |
| 32 | 1 | 1.358485  | -3.359577 | -2.003086 |
| 33 | 1 | 1.269030  | -3.690986 | -0.269704 |
| 34 | 1 | 2.518165  | -0.544710 | -3.311379 |
| 35 | 1 | 0.928740  | 0.057772  | -3.823226 |
| 36 | 1 | 1.182145  | -1.672246 | -3.592915 |
| 37 | 1 | 1.387164  | 2.577964  | -1.623732 |
| 38 | 1 | -0.347376 | 2.576176  | -1.268620 |
| 39 | 1 | 0.231136  | 1.923725  | -2.801626 |
| 40 | 1 | 0.977997  | 1.860853  | 1.688024  |
| 41 | 1 | -0.395673 | 0.884215  | 2.223556  |
| 42 | 1 | -0.624316 | 2.123790  | 0.985556  |
| 43 | 1 | -1.710311 | -3.783354 | -1.640073 |

**M2a** (E = -948.594597 a.u.)

| Center Number | Atomic Number | Coordinates (Angstroms) |           |           |
|---------------|---------------|-------------------------|-----------|-----------|
|               |               | X                       | Y         | Z         |
| 1             | 22            | -1.036437               | -1.354815 | -0.934276 |
| 2             | 7             | -2.530625               | 0.021602  | -3.534721 |
| 3             | 6             | 1.360818                | -1.427787 | -0.763526 |
| 4             | 6             | 0.894042                | -0.920956 | 0.489943  |
| 5             | 6             | 1.057888                | -0.475155 | -1.771823 |
| 6             | 17            | -0.596732               | -3.267047 | -2.391002 |
| 7             | 6             | 0.325744                | 0.360483  | 0.249305  |
| 8             | 6             | 0.396690                | 0.624059  | -1.146130 |
| 9             | 6             | -2.002956               | -0.429708 | -2.598016 |
| 10            | 6             | -3.232503               | 0.483413  | -4.728273 |
| 11            | 6             | -3.274059               | -2.509101 | -1.130873 |
| 12            | 6             | -2.732490               | -2.696148 | 0.137037  |
| 13            | 1             | -3.900250               | -1.659072 | -1.354196 |
| 14            | 6             | -2.630270               | -0.271262 | 0.263819  |
| 15            | 6             | -2.397190               | -1.541018 | 0.900407  |
| 16            | 1             | -3.539767               | -0.121556 | -0.310977 |
| 17            | 1             | -2.372324               | 0.604116  | 0.846896  |
| 18            | 6             | -2.066430               | -1.653027 | 2.376549  |
| 19            | 6             | -2.409029               | -4.095366 | 0.629332  |
| 20            | 1             | -3.182310               | -4.428620 | 1.336604  |
| 21            | 1             | -1.444235               | -4.153542 | 1.144238  |
| 22            | 1             | -2.390220               | -4.797497 | -0.208155 |
| 23            | 1             | -2.996150               | -1.818961 | 2.942753  |
| 24            | 1             | -1.624101               | -0.728283 | 2.754513  |
| 25            | 1             | -1.389429               | -2.479450 | 2.611629  |
| 26            | 6             | -4.275037               | -0.593004 | -5.103156 |
| 27            | 6             | -3.918223               | 1.824058  | -4.387892 |
| 28            | 1             | -3.786880               | -1.551133 | -5.304249 |
| 29            | 1             | -4.998558               | -0.730369 | -4.293723 |
| 30            | 1             | -4.635009               | 1.696846  | -3.570749 |
| 31            | 1             | -3.179293               | 2.575953  | -4.093849 |
| 32            | 6             | 1.265196                | -1.510381 | 1.829736  |
| 33            | 6             | 2.223426                | -2.653809 | -0.920230 |
| 34            | 6             | 1.459648                | -0.570795 | -3.220782 |
| 35            | 6             | 0.018499                | 1.931811  | -1.797531 |
| 36            | 6             | -0.025671               | 1.388715  | 1.293478  |

|    |   |           |           |           |
|----|---|-----------|-----------|-----------|
| 37 | 1 | 2.337274  | -1.357987 | 2.023270  |
| 38 | 1 | 1.081109  | -2.589597 | 1.873442  |
| 39 | 1 | 0.714900  | -1.043963 | 2.649965  |
| 40 | 1 | 3.259085  | -2.417783 | -0.632193 |
| 41 | 1 | 2.226596  | -3.015022 | -1.950164 |
| 42 | 1 | 1.882451  | -3.478818 | -0.286474 |
| 43 | 1 | 2.502396  | -0.248437 | -3.354598 |
| 44 | 1 | 0.834229  | 0.063661  | -3.856938 |
| 45 | 1 | 1.369869  | -1.597894 | -3.585821 |
| 46 | 1 | 0.796815  | 2.687724  | -1.618901 |
| 47 | 1 | -0.922692 | 2.327345  | -1.400885 |
| 48 | 1 | -0.093616 | 1.826357  | -2.880303 |
| 49 | 1 | 0.874473  | 1.962700  | 1.559301  |
| 50 | 1 | -0.408015 | 0.942021  | 2.215230  |
| 51 | 1 | -0.771461 | 2.103275  | 0.931870  |
| 52 | 1 | -4.454850 | 2.189565  | -5.268954 |
| 53 | 1 | -4.812886 | -0.276975 | -6.002612 |
| 54 | 1 | -3.345163 | -3.347138 | -1.810190 |
| 55 | 6 | -2.193535 | 0.662384  | -5.856211 |
| 56 | 1 | -2.700101 | 1.000307  | -6.765779 |
| 57 | 1 | -1.443476 | 1.409691  | -5.578631 |
| 58 | 1 | -1.686847 | -0.283724 | -6.068703 |

**TSM2a-3a** (E = -948.5858409 a.u.)

| Center Number | Atomic Number | Coordinates (Angstroms) |           |           |
|---------------|---------------|-------------------------|-----------|-----------|
|               |               | X                       | Y         | Z         |
| 1             | 22            | -1.101495               | -0.608586 | -0.596541 |
| 2             | 7             | -3.104139               | 1.228348  | -2.289278 |
| 3             | 6             | 1.272129                | -1.061212 | -0.894803 |
| 4             | 6             | 1.135788                | -0.281022 | 0.281516  |
| 5             | 6             | 0.825661                | -0.277631 | -1.999434 |
| 6             | 17            | -1.462848               | -2.451974 | -2.127535 |
| 7             | 6             | 0.604380                | 0.995197  | -0.093048 |
| 8             | 6             | 0.417286                | 0.993957  | -1.504410 |
| 9             | 6             | -2.578712               | 0.426788  | -1.546041 |
| 10            | 6             | -4.457587               | 1.710947  | -2.674210 |
| 11            | 6             | -1.784335               | 0.144362  | 1.405747  |
| 12            | 6             | -2.078583               | -1.257939 | 1.464639  |
| 13            | 1             | -2.592196               | 0.843598  | 1.202211  |
| 14            | 6             | -3.560514               | -0.776086 | -0.425926 |
| 15            | 6             | -2.912283               | -1.752027 | 0.463477  |
| 16            | 1             | -4.154007               | -1.254505 | -1.195772 |
| 17            | 1             | -4.094915               | 0.017134  | 0.096754  |
| 18            | 6             | -3.334173               | -3.202806 | 0.385710  |
| 19            | 6             | -1.481579               | -2.153784 | 2.534126  |
| 20            | 1             | -1.091975               | -3.096254 | 2.135390  |
| 21            | 1             | -2.253542               | -2.405998 | 3.275073  |
| 22            | 1             | -0.673994               | -1.643381 | 3.064506  |
| 23            | 1             | -4.193660               | -3.375768 | 1.051390  |
| 24            | 1             | -2.535582               | -3.887939 | 0.684331  |
| 25            | 1             | -3.630913               | -3.465209 | -0.632103 |
| 26            | 6             | -5.358816               | 0.529765  | -3.095262 |
| 27            | 6             | -5.066666               | 2.480876  | -1.481295 |
| 28            | 1             | -4.864348               | -0.081842 | -3.856805 |
| 29            | 1             | -5.615116               | -0.108102 | -2.245587 |
| 30            | 1             | -5.230066               | 1.821661  | -0.623107 |
| 31            | 1             | -4.407393               | 3.299289  | -1.173569 |
| 32            | 6             | 1.651365                | -0.654251 | 1.648929  |
| 33            | 6             | 1.864210                | -2.444791 | -0.984981 |
| 34            | 6             | 0.930241                | -0.649433 | -3.454609 |
| 35            | 6             | 0.064936                | 2.194232  | -2.345810 |
| 36            | 6             | 0.515178                | 2.224722  | 0.776609  |
| 37            | 1             | 2.702980                | -0.350038 | 1.751924  |
| 38            | 1             | 1.605856                | -1.733507 | 1.824250  |
| 39            | 1             | 1.092956                | -0.160284 | 2.449887  |

|    |   |           |           |           |
|----|---|-----------|-----------|-----------|
| 40 | 1 | 2.927963  | -2.389170 | -1.257417 |
| 41 | 1 | 1.351947  | -3.046899 | -1.740571 |
| 42 | 1 | 1.796647  | -2.978453 | -0.031314 |
| 43 | 1 | 1.873652  | -0.268679 | -3.873367 |
| 44 | 1 | 0.108767  | -0.225029 | -4.040180 |
| 45 | 1 | 0.905926  | -1.732057 | -3.595014 |
| 46 | 1 | 0.979985  | 2.729361  | -2.639415 |
| 47 | 1 | -0.573604 | 2.896902  | -1.802781 |
| 48 | 1 | -0.466556 | 1.909627  | -3.257491 |
| 49 | 1 | 1.353648  | 2.901659  | 0.557803  |
| 50 | 1 | 0.564971  | 1.978171  | 1.840664  |
| 51 | 1 | -0.411635 | 2.783414  | 0.606415  |
| 52 | 1 | -6.032274 | 2.907467  | -1.774301 |
| 53 | 1 | -6.291028 | 0.919700  | -3.518582 |
| 54 | 1 | -1.082045 | 0.523487  | 2.136932  |
| 55 | 6 | -4.256139 | 2.665040  | -3.870046 |
| 56 | 1 | -5.217923 | 3.078441  | -4.192217 |
| 57 | 1 | -3.594384 | 3.491931  | -3.593054 |
| 58 | 1 | -3.805688 | 2.131438  | -4.713369 |

**M3a** (E = -948.6243643 a.u.)

| Center Number | Atomic Number | Coordinates (Angstroms) |           |           |
|---------------|---------------|-------------------------|-----------|-----------|
|               |               | X                       | Y         | Z         |
| 1             | 22            | 0.459792                | -0.177472 | -0.277276 |
| 2             | 7             | -1.016288               | 1.186728  | 0.151765  |
| 3             | 6             | 2.578461                | 0.932015  | -0.135476 |
| 4             | 6             | 2.834471                | -0.436009 | -0.451088 |
| 5             | 6             | 2.000525                | 0.983647  | 1.163197  |
| 6             | 17            | 0.220843                | -0.074546 | -2.605965 |
| 7             | 6             | 2.410349                | -1.229144 | 0.651397  |
| 8             | 6             | 1.875148                | -0.350550 | 1.645403  |
| 9             | 6             | -1.164878               | 0.153847  | 0.863339  |
| 10            | 6             | -1.897220               | 2.356779  | -0.186342 |
| 11            | 6             | -0.405022               | -2.169124 | -0.008147 |
| 12            | 6             | -1.888893               | -2.288234 | -0.198432 |
| 13            | 1             | -0.136255               | -2.440643 | 1.016326  |
| 14            | 6             | -2.274278               | -0.550021 | 1.563223  |
| 15            | 6             | -2.774282               | -1.607765 | 0.565683  |
| 16            | 1             | -3.099414               | 0.107241  | 1.856548  |
| 17            | 1             | -1.885383               | -1.016328 | 2.477393  |
| 18            | 6             | -4.280052               | -1.767477 | 0.556199  |
| 19            | 6             | -2.305586               | -3.244454 | -1.301456 |
| 20            | 1             | -3.374473               | -3.223600 | -1.527537 |
| 21            | 1             | -2.028351               | -4.276602 | -1.044921 |
| 22            | 1             | -1.763370               | -2.987730 | -2.221023 |
| 23            | 1             | -4.644353               | -2.041927 | 1.557627  |
| 24            | 1             | -4.619312               | -2.540164 | -0.136853 |
| 25            | 1             | -4.785408               | -0.828353 | 0.284596  |
| 26            | 6             | -3.106322               | 1.833581  | -0.991807 |
| 27            | 6             | -2.351077               | 3.048670  | 1.115928  |
| 28            | 1             | -2.768533               | 1.294583  | -1.881793 |
| 29            | 1             | -3.723058               | 1.159723  | -0.390178 |
| 30            | 1             | -2.947097               | 2.376293  | 1.740889  |
| 31            | 1             | -1.487193               | 3.390100  | 1.696220  |
| 32            | 6             | 3.532353                | -0.932607 | -1.692067 |
| 33            | 6             | 2.940534                | 2.107026  | -1.009722 |
| 34            | 6             | 1.659842                | 2.231023  | 1.938979  |
| 35            | 6             | 1.434221                | -0.758090 | 3.029263  |
| 36            | 6             | 2.657467                | -2.706358 | 0.819701  |
| 37            | 1             | 4.623129                | -0.857615 | -1.575159 |
| 38            | 1             | 3.246246                | -0.351563 | -2.573488 |
| 39            | 1             | 3.292748                | -1.980219 | -1.898659 |
| 40            | 1             | 4.007441                | 2.350072  | -0.903023 |
| 41            | 1             | 2.371083                | 3.002953  | -0.744541 |
| 42            | 1             | 2.751996                | 1.893635  | -2.066512 |

|    |   |           |           |           |
|----|---|-----------|-----------|-----------|
| 43 | 1 | 2.499397  | 2.519177  | 2.587182  |
| 44 | 1 | 0.784725  | 2.085892  | 2.580555  |
| 45 | 1 | 1.450496  | 3.076606  | 1.277185  |
| 46 | 1 | 2.303156  | -0.880123 | 3.691738  |
| 47 | 1 | 0.893760  | -1.710634 | 3.022051  |
| 48 | 1 | 0.779013  | -0.007374 | 3.482405  |
| 49 | 1 | 3.656285  | -2.876130 | 1.246351  |
| 50 | 1 | 2.612261  | -3.240393 | -0.134759 |
| 51 | 1 | 1.930002  | -3.170356 | 1.492021  |
| 52 | 1 | -2.966968 | 3.921961  | 0.873837  |
| 53 | 1 | -3.728179 | 2.678675  | -1.308309 |
| 54 | 1 | 0.130796  | -2.839708 | -0.687760 |
| 55 | 6 | -1.066394 | 3.323258  | -1.048455 |
| 56 | 1 | -1.677923 | 4.183437  | -1.341865 |
| 57 | 1 | -0.199025 | 3.693737  | -0.491463 |
| 58 | 1 | -0.710161 | 2.819864  | -1.951876 |

**TSM3a-3b** (E = -948.6104305 a.u.)

| Center Number | Atomic Number | Coordinates (Angstroms) |           |           |
|---------------|---------------|-------------------------|-----------|-----------|
|               |               | X                       | Y         | Z         |
| 1             | 22            | 0.248393                | -0.284724 | -0.250795 |
| 2             | 7             | -0.885209               | 1.447495  | -0.619577 |
| 3             | 6             | 2.366214                | -1.473869 | 0.275440  |
| 4             | 6             | 1.923115                | -0.790054 | 1.439996  |
| 5             | 6             | 2.691514                | -0.499922 | -0.711937 |
| 6             | 17            | 0.001893                | -1.443424 | -2.248869 |
| 7             | 6             | 1.917800                | 0.606728  | 1.154133  |
| 8             | 6             | 2.415924                | 0.785153  | -0.176030 |
| 9             | 6             | -1.601676               | 0.501258  | -0.190378 |
| 10            | 6             | -1.208656               | 2.832568  | -1.124684 |
| 11            | 6             | -0.897784               | -1.626559 | 1.072916  |
| 12            | 6             | -2.195412               | -2.141152 | 0.519728  |
| 13            | 1             | -1.058946               | -1.020613 | 1.974667  |
| 14            | 6             | -3.015718               | 0.174758  | 0.143921  |
| 15            | 6             | -3.209267               | -1.333994 | 0.143304  |
| 16            | 1             | -3.219008               | 0.614552  | 1.134553  |
| 17            | 1             | -3.728170               | 0.646947  | -0.539034 |
| 18            | 6             | -4.579250               | -1.769454 | -0.331524 |
| 19            | 6             | -2.253920               | -3.654872 | 0.409041  |
| 20            | 1             | -3.133704               | -4.025378 | -0.122285 |
| 21            | 1             | -2.233089               | -4.121012 | 1.404382  |
| 22            | 1             | -1.366065               | -4.010823 | -0.130717 |
| 23            | 1             | -4.719006               | -2.852011 | -0.307165 |
| 24            | 1             | -4.765992               | -1.429159 | -1.361887 |
| 25            | 1             | -5.367548               | -1.324127 | 0.294663  |
| 26            | 6             | -0.718138               | 3.847322  | -0.072465 |
| 27            | 6             | -0.453610               | 3.005688  | -2.457390 |
| 28            | 1             | -1.227524               | 3.693516  | 0.885424  |
| 29            | 1             | 0.358741                | 3.760542  | 0.088950  |
| 30            | 1             | 0.621148                | 2.871565  | -2.318670 |
| 31            | 1             | -0.799243               | 2.272200  | -3.193234 |
| 32            | 6             | 1.709957                | -1.390229 | 2.805964  |
| 33            | 6             | 2.545752                | -2.962795 | 0.123632  |
| 34            | 6             | 3.315035                | -0.790170 | -2.051969 |
| 35            | 6             | 2.829355                | 2.091021  | -0.808914 |
| 36            | 6             | 1.665167                | 1.689866  | 2.177443  |
| 37            | 1             | 2.625758                | -1.280596 | 3.404533  |
| 38            | 1             | 1.477678                | -2.457469 | 2.756531  |
| 39            | 1             | 0.899232                | -0.899796 | 3.354617  |
| 40            | 1             | 3.581268                | -3.258739 | 0.345163  |
| 41            | 1             | 2.318250                | -3.288121 | -0.896718 |
| 42            | 1             | 1.892718                | -3.520866 | 0.802371  |
| 43            | 1             | 4.401992                | -0.921064 | -1.948323 |
| 44            | 1             | 3.144212                | 0.022967  | -2.764125 |
| 45            | 1             | 2.906528                | -1.703401 | -2.494271 |

|    |   |           |           |           |
|----|---|-----------|-----------|-----------|
| 46 | 1 | 3.891315  | 2.288495  | -0.602006 |
| 47 | 1 | 2.260801  | 2.938632  | -0.418385 |
| 48 | 1 | 2.709025  | 2.076921  | -1.896842 |
| 49 | 1 | 2.540034  | 1.809767  | 2.832967  |
| 50 | 1 | 0.809144  | 1.455911  | 2.821202  |
| 51 | 1 | 1.472402  | 2.658140  | 1.708687  |
| 52 | 1 | -0.630918 | 4.010290  | -2.857318 |
| 53 | 1 | -0.931277 | 4.865741  | -0.415752 |
| 54 | 1 | -0.264171 | -2.467578 | 1.359091  |
| 55 | 6 | -2.721482 | 3.013640  | -1.357291 |
| 56 | 1 | -2.903560 | 4.015247  | -1.762201 |
| 57 | 1 | -3.101437 | 2.284515  | -2.079964 |
| 58 | 1 | -3.288213 | 2.921528  | -0.425537 |

**M3b** (E = -948.6127734 a.u.)

| Center Number | Atomic Number | Coordinates (Angstroms) |           |           |
|---------------|---------------|-------------------------|-----------|-----------|
|               |               | X                       | Y         | Z         |
| 1             | 22            | 0.287057                | -0.173494 | -0.190348 |
| 2             | 7             | -0.854020               | 1.557349  | -0.077235 |
| 3             | 6             | 2.310801                | -1.525013 | 0.209237  |
| 4             | 6             | 2.022625                | -0.780783 | 1.387940  |
| 5             | 6             | 2.646009                | -0.602484 | -0.819262 |
| 6             | 17            | -0.110880               | -1.019901 | -2.345913 |
| 7             | 6             | 2.147829                | 0.605023  | 1.076628  |
| 8             | 6             | 2.533582                | 0.714278  | -0.293789 |
| 9             | 6             | -1.568100               | 0.516854  | -0.191676 |
| 10            | 6             | -1.265815               | 3.002942  | 0.076486  |
| 11            | 6             | -0.881794               | -1.498863 | 1.129506  |
| 12            | 6             | -2.181805               | -2.080451 | 0.626817  |
| 13            | 1             | -1.050185               | -0.867602 | 2.014842  |
| 14            | 6             | -2.996611               | 0.131736  | -0.194772 |
| 15            | 6             | -3.172722               | -1.352940 | 0.075340  |
| 16            | 1             | -3.576969               | 0.743065  | 0.512851  |
| 17            | 1             | -3.406720               | 0.366791  | -1.187608 |
| 18            | 6             | -4.533291               | -1.862966 | -0.351723 |
| 19            | 6             | -2.268692               | -3.587713 | 0.804200  |
| 20            | 1             | -3.167960               | -4.034050 | 0.373898  |
| 21            | 1             | -2.228038               | -3.857209 | 1.869121  |
| 22            | 1             | -1.401491               | -4.060704 | 0.322978  |
| 23            | 1             | -4.713047               | -2.904325 | -0.078659 |
| 24            | 1             | -4.659809               | -1.772862 | -1.441655 |
| 25            | 1             | -5.331942               | -1.261507 | 0.108602  |
| 26            | 6             | -1.695283               | 3.220157  | 1.543299  |
| 27            | 6             | -0.061779               | 3.891529  | -0.271981 |
| 28            | 1             | -2.552648               | 2.589889  | 1.802282  |
| 29            | 1             | -0.873412               | 2.985486  | 2.227536  |
| 30            | 1             | 0.767344                | 3.716697  | 0.416577  |
| 31            | 1             | 0.283509                | 3.693358  | -1.291645 |
| 32            | 6             | 1.846045                | -1.330302 | 2.781099  |
| 33            | 6             | 2.348641                | -3.027196 | 0.082552  |
| 34            | 6             | 3.159350                | -0.953103 | -2.190402 |
| 35            | 6             | 2.947545                | 1.962952  | -1.036219 |
| 36            | 6             | 2.117256                | 1.704704  | 2.112154  |
| 37            | 1             | 2.794712                | -1.259720 | 3.332742  |
| 38            | 1             | 1.551217                | -2.383158 | 2.774330  |
| 39            | 1             | 1.092716                | -0.778456 | 3.353947  |
| 40            | 1             | 3.366128                | -3.409748 | 0.247340  |
| 41            | 1             | 2.030654                | -3.351447 | -0.913872 |
| 42            | 1             | 1.694163                | -3.513132 | 0.813399  |
| 43            | 1             | 4.253497                | -1.064923 | -2.166438 |
| 44            | 1             | 2.917130                | -0.178033 | -2.923555 |
| 45            | 1             | 2.731854                | -1.890760 | -2.555344 |
| 46            | 1             | 4.030204                | 1.950362  | -1.224402 |
| 47            | 1             | 2.724154                | 2.867933  | -0.466773 |
| 48            | 1             | 2.450232                | 2.049622  | -2.009429 |

|    |   |           |           |           |
|----|---|-----------|-----------|-----------|
| 49 | 1 | 2.992625  | 1.624937  | 2.772585  |
| 50 | 1 | 1.227196  | 1.653309  | 2.750075  |
| 51 | 1 | 2.144608  | 2.696798  | 1.655223  |
| 52 | 1 | -0.347078 | 4.946902  | -0.202464 |
| 53 | 1 | -1.981697 | 4.266801  | 1.696195  |
| 54 | 1 | -0.235759 | -2.312998 | 1.459074  |
| 55 | 6 | -2.426496 | 3.315651  | -0.892979 |
| 56 | 1 | -2.660210 | 4.385033  | -0.848209 |
| 57 | 1 | -2.146786 | 3.069952  | -1.923259 |
| 58 | 1 | -3.334113 | 2.763381  | -0.636206 |

**TSM3b-4** (E = -948.5954742 a.u.)

| Center Number | Atomic Number | Coordinates (Angstroms) |           |           |
|---------------|---------------|-------------------------|-----------|-----------|
|               |               | X                       | Y         | Z         |
| 1             | 22            | 0.677413                | 0.035662  | -0.662299 |
| 2             | 7             | -0.617761               | 1.507884  | -0.444284 |
| 3             | 6             | 2.830654                | -1.089002 | -0.563315 |
| 4             | 6             | 2.497443                | -0.635054 | 0.741803  |
| 5             | 6             | 3.020069                | 0.056725  | -1.392813 |
| 6             | 17            | 0.243202                | -1.206636 | -2.630221 |
| 7             | 6             | 2.465642                | 0.793503  | 0.715809  |
| 8             | 6             | 2.806680                | 1.219264  | -0.605820 |
| 9             | 6             | -1.217381               | 0.332491  | -0.492621 |
| 10            | 6             | -1.213443               | 2.856027  | -0.189648 |
| 11            | 6             | -0.759364               | -0.943998 | 0.930080  |
| 12            | 6             | -2.138497               | -1.545863 | 1.005136  |
| 13            | 1             | -0.472007               | -0.437972 | 1.858307  |
| 14            | 6             | -2.610071               | -0.086550 | -0.845956 |
| 15            | 6             | -3.051626               | -1.170170 | 0.099679  |
| 16            | 1             | -3.316374               | 0.749687  | -0.809739 |
| 17            | 1             | -2.602692               | -0.446159 | -1.884545 |
| 18            | 6             | -4.452777               | -1.700293 | -0.075952 |
| 19            | 6             | -2.336219               | -2.585209 | 2.087794  |
| 20            | 1             | -3.358234               | -2.972772 | 2.122010  |
| 21            | 1             | -2.103502               | -2.161082 | 3.074420  |
| 22            | 1             | -1.656031               | -3.435738 | 1.939424  |
| 23            | 1             | -4.706604               | -2.476101 | 0.650503  |
| 24            | 1             | -4.578263               | -2.127048 | -1.081058 |
| 25            | 1             | -5.191921               | -0.892288 | 0.020790  |
| 26            | 6             | -2.079626               | 2.801878  | 1.089678  |
| 27            | 6             | -0.079256               | 3.877146  | -0.004189 |
| 28            | 1             | -2.900036               | 2.084353  | 0.991279  |
| 29            | 1             | -1.470661               | 2.509768  | 1.952535  |
| 30            | 1             | 0.539344                | 3.621025  | 0.859483  |
| 31            | 1             | 0.554901                | 3.912546  | -0.894178 |
| 32            | 6             | 2.399876                | -1.480690 | 1.988336  |
| 33            | 6             | 3.058801                | -2.517524 | -0.989456 |
| 34            | 6             | 3.485149                | 0.031136  | -2.826300 |
| 35            | 6             | 3.105392                | 2.627806  | -1.062699 |
| 36            | 6             | 2.342090                | 1.655819  | 1.951023  |
| 37            | 1             | 3.372385                | -1.515086 | 2.500203  |
| 38            | 1             | 2.114302                | -2.513548 | 1.763625  |
| 39            | 1             | 1.671681                | -1.082309 | 2.703100  |
| 40            | 1             | 4.132509                | -2.754186 | -0.984473 |
| 41            | 1             | 2.678810                | -2.695632 | -2.000003 |
| 42            | 1             | 2.562573                | -3.226843 | -0.319035 |
| 43            | 1             | 4.574020                | -0.115481 | -2.875702 |
| 44            | 1             | 3.253951                | 0.969163  | -3.341270 |
| 45            | 1             | 3.009645                | -0.780110 | -3.385634 |
| 46            | 1             | 4.187561                | 2.755415  | -1.206325 |
| 47            | 1             | 2.782025                | 3.370129  | -0.329785 |
| 48            | 1             | 2.620821                | 2.867374  | -2.015917 |
| 49            | 1             | 3.208740                | 1.500037  | 2.608994  |
| 50            | 1             | 1.445465                | 1.424783  | 2.538458  |
| 51            | 1             | 2.309714                | 2.718925  | 1.700802  |

|    |   |            |           |           |
|----|---|------------|-----------|-----------|
| 52 | 1 | -0.500138  | 4.875733  | 0.158537  |
| 53 | 1 | -2.511630  | 3.788568  | 1.292463  |
| 54 | 1 | -0.050563  | -1.771465 | 0.790539  |
| 55 | 6 | -2.059173  | 3.281507  | -1.415827 |
| 56 | 1 | -2.439899  | 4.299141  | -1.269805 |
| 57 | 1 | -1.443448  | 3.268221  | -2.321494 |
| 58 | 1 | -2.914424v | 2.619610  | -1.574075 |

**M4** (E = -948.6194269 a.u.)

| Center Number | Atomic Number | Coordinates (Angstroms) |           |           |
|---------------|---------------|-------------------------|-----------|-----------|
|               |               | X                       | Y         | Z         |
| 1             | 22            | 0.362855                | -0.240263 | -0.153593 |
| 2             | 7             | -0.539266               | 1.442955  | 0.141009  |
| 3             | 6             | 2.173574                | -1.804055 | 0.092552  |
| 4             | 6             | 1.977202                | -1.123212 | 1.327373  |
| 5             | 6             | 2.616190                | -0.848292 | -0.864229 |
| 6             | 17            | -0.306423               | -1.306579 | -2.140024 |
| 7             | 6             | 2.315549                | 0.251407  | 1.133278  |
| 8             | 6             | 2.710586                | 0.423457  | -0.226936 |
| 9             | 6             | -1.564699               | 0.522074  | 0.117217  |
| 10            | 6             | -0.746637               | 2.912781  | 0.013708  |
| 11            | 6             | -1.647087               | -0.522367 | 1.184405  |
| 12            | 6             | -2.892113               | -1.313077 | 0.861426  |
| 13            | 1             | -1.572723               | -0.159666 | 2.216209  |
| 14            | 6             | -2.804747               | 0.418909  | -0.754141 |
| 15            | 6             | -3.522284               | -0.793320 | -0.203746 |
| 16            | 1             | -3.452834               | 1.303593  | -0.677037 |
| 17            | 1             | -2.559106               | 0.298255  | -1.815355 |
| 18            | 6             | -4.789536               | -1.273307 | -0.857350 |
| 19            | 6             | -3.264712               | -2.511063 | 1.692892  |
| 20            | 1             | -4.209413               | -2.958298 | 1.370428  |
| 21            | 1             | -3.365218               | -2.239502 | 2.753224  |
| 22            | 1             | -2.489328               | -3.288135 | 1.632464  |
| 23            | 1             | -5.235683               | -2.122967 | -0.332103 |
| 24            | 1             | -4.595419               | -1.580467 | -1.894043 |
| 25            | 1             | -5.536648               | -0.468297 | -0.896429 |
| 26            | 6             | -1.821398               | 3.363390  | 1.032114  |
| 27            | 6             | 0.570213                | 3.645014  | 0.320199  |
| 28            | 1             | -2.782412               | 2.874951  | 0.842741  |
| 29            | 1             | -1.506251               | 3.116762  | 2.052484  |
| 30            | 1             | 0.899879                | 3.440574  | 1.342195  |
| 31            | 1             | 1.354274                | 3.335486  | -0.373701 |
| 32            | 6             | 1.647105                | -1.751756 | 2.661854  |
| 33            | 6             | 2.009585                | -3.283066 | -0.153934 |
| 34            | 6             | 3.054702                | -1.148104 | -2.274138 |
| 35            | 6             | 3.370468                | 1.631660  | -0.850141 |
| 36            | 6             | 2.443377                | 1.251012  | 2.258108  |
| 37            | 1             | 2.568867                | -1.983799 | 3.214846  |
| 38            | 1             | 1.091011                | -2.687782 | 2.546405  |
| 39            | 1             | 1.051546                | -1.082766 | 3.293473  |
| 40            | 1             | 2.978715                | -3.797285 | -0.082595 |
| 41            | 1             | 1.599049                | -3.478319 | -1.149433 |
| 42            | 1             | 1.338654                | -3.744503 | 0.578248  |
| 43            | 1             | 4.119261                | -1.424827 | -2.290795 |
| 44            | 1             | 2.926595                | -0.280401 | -2.929069 |
| 45            | 1             | 2.483049                | -1.973565 | -2.706313 |
| 46            | 1             | 4.419689                | 1.406540  | -1.087878 |
| 47            | 1             | 3.367440                | 2.489155  | -0.172914 |
| 48            | 1             | 2.886197                | 1.940135  | -1.783717 |
| 49            | 1             | 3.230217                | 0.930687  | 2.955498  |
| 50            | 1             | 1.517793                | 1.355892  | 2.835383  |
| 51            | 1             | 2.715312                | 2.241652  | 1.887550  |
| 52            | 1             | 0.426911                | 4.726400  | 0.214595  |
| 53            | 1             | -1.970571               | 4.447460  | 0.969709  |
| 54            | 1             | -0.731301               | -1.255650 | 1.144746  |



|    |   |           |          |           |
|----|---|-----------|----------|-----------|
| 55 | 6 | -1.185294 | 3.271319 | -1.430128 |
| 56 | 1 | -1.294655 | 4.358177 | -1.528334 |
| 57 | 1 | -0.431418 | 2.931432 | -2.148360 |
| 58 | 1 | -2.140497 | 2.809598 | -1.692032 |

**TSM4-5** (E = -948.6142426 a.u.)

| Center Number | Atomic Number | Coordinates (Angstroms) |           |           |
|---------------|---------------|-------------------------|-----------|-----------|
|               |               | X                       | Y         | Z         |
| 1             | 22            | 0.380511                | -0.196944 | -0.192838 |
| 2             | 7             | -0.611085               | 1.445556  | 0.307767  |
| 3             | 6             | 2.103123                | -1.786310 | 0.218317  |
| 4             | 6             | 1.937513                | -1.015262 | 1.407929  |
| 5             | 6             | 2.575079                | -0.912850 | -0.795973 |
| 6             | 17            | -0.216037               | -0.655994 | -2.390616 |
| 7             | 6             | 2.354962                | 0.319980  | 1.137091  |
| 8             | 6             | 2.728519                | 0.396082  | -0.231276 |
| 9             | 6             | -1.675973               | 0.588879  | 0.293670  |
| 10            | 6             | -0.779277               | 2.913803  | 0.083449  |
| 11            | 6             | -1.597356               | -0.633321 | 1.026253  |
| 12            | 6             | -2.808930               | -1.441576 | 0.699296  |
| 13            | 1             | -1.198675               | -0.627064 | 2.038683  |
| 14            | 6             | -2.918120               | 0.528330  | -0.591709 |
| 15            | 6             | -3.556863               | -0.788413 | -0.208569 |
| 16            | 1             | -3.602457               | 1.365180  | -0.403781 |
| 17            | 1             | -2.663328               | 0.553723  | -1.655687 |
| 18            | 6             | -4.860340               | -1.211725 | -0.827988 |
| 19            | 6             | -3.046046               | -2.781147 | 1.340362  |
| 20            | 1             | -3.990083               | -3.229618 | 1.017733  |
| 21            | 1             | -3.069934               | -2.696611 | 2.435742  |
| 22            | 1             | -2.237310               | -3.481250 | 1.087924  |
| 23            | 1             | -5.212940               | -2.170207 | -0.435129 |
| 24            | 1             | -4.761938               | -1.310658 | -1.917799 |
| 25            | 1             | -5.643654               | -0.462835 | -0.644187 |
| 26            | 6             | -1.788386               | 3.466617  | 1.118295  |
| 27            | 6             | 0.578692                | 3.603296  | 0.296367  |
| 28            | 1             | -2.774471               | 3.005710  | 1.001988  |
| 29            | 1             | -1.436077               | 3.268602  | 2.136849  |
| 30            | 1             | 0.937392                | 3.447992  | 1.316383  |
| 31            | 1             | 1.322354                | 3.215017  | -0.403339 |
| 32            | 6             | 1.550599                | -1.544367 | 2.768097  |
| 33            | 6             | 1.902948                | -3.274663 | 0.076585  |
| 34            | 6             | 3.024331                | -1.316105 | -2.176992 |
| 35            | 6             | 3.398627                | 1.546195  | -0.945055 |
| 36            | 6             | 2.519187                | 1.379858  | 2.198020  |
| 37            | 1             | 2.443004                | -1.862677 | 3.326246  |
| 38            | 1             | 0.884923                | -2.410536 | 2.694371  |
| 39            | 1             | 1.046111                | -0.781991 | 3.372083  |
| 40            | 1             | 2.860743                | -3.804286 | 0.182528  |
| 41            | 1             | 1.487544                | -3.534457 | -0.902484 |
| 42            | 1             | 1.222371                | -3.664184 | 0.839949  |
| 43            | 1             | 4.098418                | -1.553772 | -2.170206 |
| 44            | 1             | 2.861861                | -0.515991 | -2.905109 |
| 45            | 1             | 2.486519                | -2.197704 | -2.536109 |
| 46            | 1             | 4.439131                | 1.285930  | -1.185445 |
| 47            | 1             | 3.421799                | 2.448757  | -0.328988 |
| 48            | 1             | 2.902062                | 1.796567  | -1.889686 |
| 49            | 1             | 3.269321                | 1.055758  | 2.932571  |
| 50            | 1             | 1.588464                | 1.574065  | 2.742403  |
| 51            | 1             | 2.861069                | 2.326556  | 1.774165  |
| 52            | 1             | 0.477882                | 4.681155  | 0.127378  |
| 53            | 1             | -1.901184               | 4.549855  | 0.995221  |
| 54            | 1             | -0.488451               | -1.512456 | 0.487379  |
| 55            | 6             | -1.260840               | 3.221041  | -1.358368 |
| 56            | 1             | -1.256359               | 4.305090  | -1.522710 |
| 57            | 1             | -0.593965               | 2.755674  | -2.091447 |

| <b>M5</b> (E = -948.6222201 a.u.)   |               |                         |           |           |
|-------------------------------------|---------------|-------------------------|-----------|-----------|
| Center Number                       | Atomic Number | Coordinates (Angstroms) |           |           |
|                                     |               | X                       | Y         | Z         |
| 58                                  | 1             | -2.275963               | 2.860942  | -1.540607 |
| 1                                   | 22            | 0.451624                | -0.154950 | -0.346251 |
| 2                                   | 7             | -0.723544               | 1.238060  | 0.435998  |
| 3                                   | 6             | 2.038444                | -1.916442 | 0.024969  |
| 4                                   | 6             | 1.740988                | -1.324146 | 1.289776  |
| 5                                   | 6             | 2.665226                | -0.923253 | -0.776863 |
| 6                                   | 17            | 0.346006                | 0.530542  | -2.550789 |
| 7                                   | 6             | 2.224977                | 0.016693  | 1.282823  |
| 8                                   | 6             | 2.782894                | 0.271051  | 0.001174  |
| 9                                   | 6             | -1.793241               | 0.385619  | 0.365165  |
| 10                                  | 6             | -0.891779               | 2.725529  | 0.444937  |
| 11                                  | 6             | -1.728502               | -0.880522 | 0.910098  |
| 12                                  | 6             | -2.857457               | -1.697729 | 0.449490  |
| 13                                  | 1             | -1.057699               | -1.162362 | 1.708937  |
| 14                                  | 6             | -3.041147               | 0.429788  | -0.516205 |
| 15                                  | 6             | -3.642769               | -0.947444 | -0.355584 |
| 16                                  | 1             | -3.747828               | 1.209380  | -0.208756 |
| 17                                  | 1             | -2.768517               | 0.639358  | -1.555450 |
| 18                                  | 6             | -4.938508               | -1.312092 | -1.024816 |
| 19                                  | 6             | -3.038560               | -3.129273 | 0.877690  |
| 20                                  | 1             | -3.977726               | -3.552391 | 0.509215  |
| 21                                  | 1             | -3.034956               | -3.218100 | 1.972607  |
| 22                                  | 1             | -2.217501               | -3.752603 | 0.498137  |
| 23                                  | 1             | -5.255498               | -2.329626 | -0.775754 |
| 24                                  | 1             | -4.852964               | -1.247200 | -2.118703 |
| 25                                  | 1             | -5.745201               | -0.626913 | -0.727036 |
| 26                                  | 6             | -1.677802               | 3.118117  | 1.718241  |
| 27                                  | 6             | 0.508000                | 3.364865  | 0.487953  |
| 28                                  | 1             | -2.669440               | 2.651398  | 1.727008  |
| 29                                  | 1             | -1.139956               | 2.794661  | 2.616381  |
| 30                                  | 1             | 1.064840                | 3.022978  | 1.362455  |
| 31                                  | 1             | 1.074629                | 3.117528  | -0.414776 |
| 32                                  | 6             | 1.230671                | -2.054467 | 2.508040  |
| 33                                  | 6             | 1.901234                | -3.375865 | -0.328275 |
| 34                                  | 6             | 3.245400                | -1.138316 | -2.150865 |
| 35                                  | 6             | 3.513091                | 1.512191  | -0.449112 |
| 36                                  | 6             | 2.268401                | 0.904625  | 2.501967  |
| 37                                  | 1             | 2.071126                | -2.492438 | 3.066171  |
| 38                                  | 1             | 0.555111                | -2.873924 | 2.242467  |
| 39                                  | 1             | 0.701917                | -1.385168 | 3.195525  |
| 40                                  | 1             | 2.824192                | -3.915550 | -0.070871 |
| 41                                  | 1             | 1.719251                | -3.515292 | -1.397676 |
| 42                                  | 1             | 1.075301                | -3.847113 | 0.212231  |
| 43                                  | 1             | 4.268527                | -1.534684 | -2.075408 |
| 44                                  | 1             | 3.285190                | -0.205925 | -2.720185 |
| 45                                  | 1             | 2.651851                | -1.850076 | -2.732591 |
| 46                                  | 1             | 4.592997                | 1.314232  | -0.498129 |
| 47                                  | 1             | 3.360748                | 2.348187  | 0.237896  |
| 48                                  | 1             | 3.193414                | 1.833218  | -1.446214 |
| 49                                  | 1             | 2.879610                | 0.433205  | 3.283666  |
| 50                                  | 1             | 1.272789                | 1.082533  | 2.923041  |
| 51                                  | 1             | 2.717526                | 1.875519  | 2.278575  |
| 52                                  | 1             | 0.415742                | 4.455118  | 0.544076  |
| 53                                  | 1             | -1.810825               | 4.205258  | 1.764705  |
| 54                                  | 1             | -0.138611               | -1.656012 | -0.745613 |
| 55                                  | 6             | -1.621406               | 3.255057  | -0.817347 |
| 56                                  | 1             | -1.550794               | 4.348839  | -0.840862 |
| 57                                  | 1             | -1.156699               | 2.858163  | -1.724479 |
| 58                                  | 1             | -2.682497               | 2.995156  | -0.821184 |
| <b>M6a</b> (E = -1199.2794629 a.u.) |               |                         |           |           |
| Center Number                       | Atomic Number | Coordinates (Angstroms) |           |           |

|    |    | X         | Y         | Z         |
|----|----|-----------|-----------|-----------|
| 1  | 22 | 0.510408  | -0.713766 | 0.083069  |
| 2  | 7  | -1.254166 | -0.705351 | 0.917461  |
| 3  | 6  | 1.969681  | -0.900055 | -1.915221 |
| 4  | 6  | 0.639891  | -1.357443 | -2.201009 |
| 5  | 6  | 2.534854  | -1.760356 | -0.944752 |
| 6  | 17 | 1.898005  | -0.755774 | 2.122544  |
| 7  | 6  | 0.394107  | -2.506848 | -1.399185 |
| 8  | 6  | 1.555612  | -2.734934 | -0.593084 |
| 9  | 6  | -2.197405 | 0.098118  | 0.228216  |
| 10 | 6  | -1.756807 | -1.331149 | 2.216572  |
| 11 | 6  | -3.044476 | -0.254339 | -0.766804 |
| 12 | 6  | -3.844677 | 0.900216  | -1.198908 |
| 13 | 1  | -3.132134 | -1.245262 | -1.194052 |
| 14 | 6  | -2.435338 | 1.569824  | 0.526807  |
| 15 | 6  | -3.501328 | 1.982306  | -0.458897 |
| 16 | 1  | -2.766269 | 1.718261  | 1.562540  |
| 17 | 1  | -1.509735 | 2.145462  | 0.415663  |
| 18 | 6  | -4.037776 | 3.386863  | -0.518254 |
| 19 | 6  | -4.868714 | 0.801566  | -2.300749 |
| 20 | 1  | -5.369645 | 1.757262  | -2.483914 |
| 21 | 1  | -5.640385 | 0.059241  | -2.054400 |
| 22 | 1  | -4.403506 | 0.480025  | -3.242837 |
| 23 | 1  | -4.807755 | 3.496738  | -1.289220 |
| 24 | 1  | -3.241490 | 4.112645  | -0.739293 |
| 25 | 1  | -4.483591 | 3.687797  | 0.441027  |
| 26 | 6  | -3.275329 | -1.619261 | 2.156057  |
| 27 | 6  | -1.031911 | -2.674703 | 2.445139  |
| 28 | 1  | -3.867721 | -0.704604 | 2.059084  |
| 29 | 1  | -3.521427 | -2.272379 | 1.312068  |
| 30 | 1  | -1.267968 | -3.376414 | 1.637406  |
| 31 | 1  | 0.049848  | -2.539901 | 2.501734  |
| 32 | 6  | -0.231326 | -0.864611 | -3.329375 |
| 33 | 6  | 2.666675  | 0.222502  | -2.641942 |
| 34 | 6  | 3.941586  | -1.718228 | -0.411046 |
| 35 | 6  | 1.801379  | -3.908036 | 0.322149  |
| 36 | 6  | -0.790319 | -3.433490 | -1.531270 |
| 37 | 1  | -0.031243 | -1.439476 | -4.245663 |
| 38 | 1  | -0.045665 | 0.191280  | -3.547020 |
| 39 | 1  | -1.294323 | -0.967159 | -3.093689 |
| 40 | 1  | 3.050151  | -0.126168 | -3.611473 |
| 41 | 1  | 3.516773  | 0.608098  | -2.070956 |
| 42 | 1  | 1.987082  | 1.058289  | -2.839210 |
| 43 | 1  | 4.560895  | -2.477748 | -0.909885 |
| 44 | 1  | 3.961969  | -1.913316 | 0.664750  |
| 45 | 1  | 4.411065  | -0.743995 | -0.578877 |
| 46 | 1  | 2.442567  | -4.651088 | -0.173690 |
| 47 | 1  | 0.869686  | -4.409273 | 0.599038  |
| 48 | 1  | 2.301848  | -3.594575 | 1.243934  |
| 49 | 1  | -0.578757 | -4.211657 | -2.279217 |
| 50 | 1  | -1.686721 | -2.898621 | -1.856642 |
| 51 | 1  | -1.026813 | -3.937287 | -0.589854 |
| 52 | 1  | -1.367685 | -3.119374 | 3.389843  |
| 53 | 1  | -3.575720 | -2.123547 | 3.082036  |
| 54 | 1  | -0.122009 | 0.444536  | -0.952189 |
| 55 | 6  | -1.465573 | -0.371789 | 3.396522  |
| 56 | 1  | -1.791406 | -0.825786 | 4.341220  |
| 57 | 1  | -0.395469 | -0.160160 | 3.457593  |
| 58 | 1  | -2.005723 | 0.573209  | 3.273314  |
| 59 | 6  | 1.908944  | 4.519421  | -0.896362 |
| 60 | 6  | 2.216366  | 3.719940  | 0.387324  |
| 61 | 1  | 2.412720  | 4.075717  | -1.760831 |
| 62 | 1  | 0.832310  | 4.542850  | -1.091291 |
| 63 | 1  | 2.264403  | 5.547755  | -0.777340 |

|    |   |          |          |           |
|----|---|----------|----------|-----------|
| 64 | 6 | 1.473944 | 4.314897 | 1.604498  |
| 65 | 6 | 3.736288 | 3.648331 | 0.648950  |
| 66 | 1 | 1.668261 | 3.722074 | 2.503044  |
| 67 | 1 | 1.823999 | 5.337889 | 1.774678  |
| 68 | 1 | 0.394366 | 4.340560 | 1.426442  |
| 69 | 1 | 4.124104 | 4.659984 | 0.805133  |
| 70 | 1 | 3.946892 | 3.049173 | 1.539479  |
| 71 | 1 | 4.256905 | 3.204273 | -0.205270 |
| 72 | 7 | 1.727887 | 2.356669 | 0.203751  |
| 73 | 6 | 1.349354 | 1.257335 | 0.140880  |

**TSM6a-7a** (E = -1199.2773702 a.u.)

| Center Number | Atomic Number | Coordinates (Angstroms) |           |           |
|---------------|---------------|-------------------------|-----------|-----------|
|               |               | X                       | Y         | Z         |
| 1             | 22            | -0.998379               | -0.222670 | -0.139267 |
| 2             | 7             | 0.374776                | -1.580727 | -0.479768 |
| 3             | 6             | -2.228050               | 1.302470  | 1.390394  |
| 4             | 6             | -1.507525               | 0.299656  | 2.124672  |
| 5             | 6             | -3.220765               | 0.655184  | 0.615453  |
| 6             | 17            | -2.020965               | -0.111387 | -2.331681 |
| 7             | 6             | -2.064849               | -0.966358 | 1.794218  |
| 8             | 6             | -3.108366               | -0.745570 | 0.834686  |
| 9             | 6             | 1.658721                | -1.320232 | 0.054443  |
| 10            | 6             | 0.284346                | -2.834666 | -1.347616 |
| 11            | 6             | 2.094286                | -1.499392 | 1.322823  |
| 12            | 6             | 3.486635                | -1.049206 | 1.463359  |
| 13            | 1             | 1.506729                | -1.914174 | 2.131955  |
| 14            | 6             | 2.815320                | -0.733868 | -0.742119 |
| 15            | 6             | 3.928739                | -0.589851 | 0.267670  |
| 16            | 1             | 3.115466                | -1.387535 | -1.569441 |
| 17            | 1             | 2.526763                | 0.217972  | -1.202806 |
| 18            | 6             | 5.284442                | -0.054379 | -0.106331 |
| 19            | 6             | 4.232070                | -1.136515 | 2.770548  |
| 20            | 1             | 5.255630                | -0.758259 | 2.686821  |
| 21            | 1             | 4.285636                | -2.175726 | 3.123099  |
| 22            | 1             | 3.722636                | -0.558257 | 3.553722  |
| 23            | 1             | 5.962237                | -0.025887 | 0.753333  |
| 24            | 1             | 5.218928                | 0.965993  | -0.511227 |
| 25            | 1             | 5.759226                | -0.671944 | -0.882622 |
| 26            | 6             | 1.225707                | -3.941106 | -0.814921 |
| 27            | 6             | -1.158924               | -3.379785 | -1.292777 |
| 28            | 1             | 2.280374                | -3.658527 | -0.885515 |
| 29            | 1             | 1.006987                | -4.170408 | 0.233684  |
| 30            | 1             | -1.420174               | -3.667712 | -0.268921 |
| 31            | 1             | -1.878359               | -2.644272 | -1.659368 |
| 32            | 6             | -0.528158               | 0.568083  | 3.240407  |
| 33            | 6             | -2.071018               | 2.791044  | 1.571381  |
| 34            | 6             | -4.263874               | 1.319108  | -0.242099 |
| 35            | 6             | -4.058677               | -1.777103 | 0.280194  |
| 36            | 6             | -1.759458               | -2.269371 | 2.493599  |
| 37            | 1             | -1.060914               | 0.674663  | 4.196826  |
| 38            | 1             | 0.038406                | 1.488275  | 3.069300  |
| 39            | 1             | 0.194181                | -0.245280 | 3.350176  |
| 40            | 1             | -2.702545               | 3.142492  | 2.399805  |
| 41            | 1             | -2.364090               | 3.343254  | 0.673564  |
| 42            | 1             | -1.038185               | 3.063559  | 1.809936  |
| 43            | 1             | -5.222089               | 1.371657  | 0.294944  |
| 44            | 1             | -4.423091               | 0.765790  | -1.171750 |
| 45            | 1             | -3.975948               | 2.339358  | -0.512714 |
| 46            | 1             | -5.029132               | -1.711380 | 0.792662  |
| 47            | 1             | -3.682690               | -2.794601 | 0.416238  |
| 48            | 1             | -4.235419               | -1.622050 | -0.789106 |
| 49            | 1             | -2.387038               | -2.372090 | 3.390916  |
| 50            | 1             | -0.715091               | -2.324255 | 2.813344  |
| 51            | 1             | -1.955506               | -3.134886 | 1.854956  |

|    |   |           |           |           |
|----|---|-----------|-----------|-----------|
| 52 | 1 | -1.240279 | -4.271277 | -1.926154 |
| 53 | 1 | 1.077952  | -4.851797 | -1.407185 |
| 54 | 1 | 0.286382  | 0.639623  | 0.593960  |
| 55 | 6 | 0.648473  | -2.499796 | -2.814593 |
| 56 | 1 | 0.531435  | -3.392251 | -3.442561 |
| 57 | 1 | -0.006036 | -1.712637 | -3.196314 |
| 58 | 1 | 1.686904  | -2.164796 | -2.899614 |
| 59 | 6 | 2.197790  | 3.470324  | 0.331807  |
| 60 | 6 | 1.356224  | 3.654255  | -0.948264 |
| 61 | 1 | 1.575432  | 3.582839  | 1.225638  |
| 62 | 1 | 2.663549  | 2.480066  | 0.357675  |
| 63 | 1 | 2.987060  | 4.228778  | 0.363686  |
| 64 | 6 | 2.225637  | 3.498293  | -2.215156 |
| 65 | 6 | 0.639933  | 5.020956  | -0.951048 |
| 66 | 1 | 1.612484  | 3.586883  | -3.116922 |
| 67 | 1 | 2.989450  | 4.282512  | -2.230997 |
| 68 | 1 | 2.725470  | 2.524669  | -2.228209 |
| 69 | 1 | 1.384257  | 5.823684  | -0.938018 |
| 70 | 1 | 0.022098  | 5.130196  | -1.847486 |
| 71 | 1 | -0.000342 | 5.126897  | -0.069652 |
| 72 | 7 | 0.324110  | 2.610172  | -0.998616 |
| 73 | 6 | -0.197015 | 1.606689  | -0.660367 |

**M7a** (E = -1199.3003885 a.u.)

| Center Number | Atomic Number | Coordinates (Angstroms) |           |           |
|---------------|---------------|-------------------------|-----------|-----------|
|               |               | X                       | Y         | Z         |
| 1             | 22            | 0.859885                | -0.189267 | -0.193568 |
| 2             | 7             | 0.556008                | 1.694385  | -0.452361 |
| 3             | 6             | 1.402946                | -2.146506 | 1.254793  |
| 4             | 6             | 1.358086                | -0.969596 | 2.063916  |
| 5             | 6             | 2.452757                | -1.996476 | 0.320154  |
| 6             | 17            | 1.463679                | -0.660789 | -2.398477 |
| 7             | 6             | 2.401756                | -0.097437 | 1.637712  |
| 8             | 6             | 3.070464                | -0.727334 | 0.548469  |
| 9             | 6             | -0.709224               | 1.821273  | 0.126883  |
| 10            | 6             | 1.106183                | 2.837164  | -1.268430 |
| 11            | 6             | -0.996354               | 1.666019  | 1.451804  |
| 12            | 6             | -2.440025               | 1.731786  | 1.684146  |
| 13            | 1             | -0.257266               | 1.557192  | 2.231234  |
| 14            | 6             | -2.032291               | 2.017634  | -0.600182 |
| 15            | 6             | -3.063730               | 1.951517  | 0.499559  |
| 16            | 1             | -2.089137               | 2.974188  | -1.131262 |
| 17            | 1             | -2.168301               | 1.233525  | -1.352848 |
| 18            | 6             | -4.525248               | 2.170487  | 0.225852  |
| 19            | 6             | -3.046062               | 1.612117  | 3.059199  |
| 20            | 1             | -4.131821               | 1.744566  | 3.040670  |
| 21            | 1             | -2.627202               | 2.365687  | 3.739693  |
| 22            | 1             | -2.836507               | 0.628496  | 3.500359  |
| 23            | 1             | -5.128347               | 2.101337  | 1.136527  |
| 24            | 1             | -4.912672               | 1.432000  | -0.489542 |
| 25            | 1             | -4.700041               | 3.161326  | -0.217251 |
| 26            | 6             | 0.844131                | 4.172531  | -0.534187 |
| 27            | 6             | 2.628090                | 2.641390  | -1.410434 |
| 28            | 1             | -0.226469               | 4.374068  | -0.423387 |
| 29            | 1             | 1.293024                | 4.157580  | 0.465412  |
| 30            | 1             | 3.110415                | 2.649516  | -0.428168 |
| 31            | 1             | 2.855157                | 1.698784  | -1.913349 |
| 32            | 6             | 0.514641                | -0.823474 | 3.307053  |
| 33            | 6             | 0.590978                | -3.396209 | 1.474159  |
| 34            | 6             | 2.929350                | -3.046865 | -0.647222 |
| 35            | 6             | 4.331386                | -0.259650 | -0.133351 |
| 36            | 6             | 2.834399                | 1.167909  | 2.338268  |
| 37            | 1             | 0.827941                | -1.562985 | 4.057319  |
| 38            | 1             | -0.551405               | -0.988557 | 3.114917  |
| 39            | 1             | 0.626939                | 0.165201  | 3.760902  |

|    |   |           |           |           |
|----|---|-----------|-----------|-----------|
| 40 | 1 | 1.140603  | -4.095248 | 2.121096  |
| 41 | 1 | 0.379650  | -3.912063 | 0.532580  |
| 42 | 1 | -0.365408 | -3.182470 | 1.960375  |
| 43 | 1 | 3.657296  | -3.711141 | -0.158567 |
| 44 | 1 | 3.410212  | -2.598588 | -1.519868 |
| 45 | 1 | 2.102994  | -3.664686 | -1.011920 |
| 46 | 1 | 5.191374  | -0.833078 | 0.241133  |
| 47 | 1 | 4.532950  | 0.797459  | 0.055587  |
| 48 | 1 | 4.281356  | -0.405353 | -1.216839 |
| 49 | 1 | 3.469739  | 0.924563  | 3.201907  |
| 50 | 1 | 1.985173  | 1.750844  | 2.707781  |
| 51 | 1 | 3.412618  | 1.818529  | 1.677385  |
| 52 | 1 | 3.050356  | 3.460247  | -2.004073 |
| 53 | 1 | 1.287585  | 4.999563  | -1.100264 |
| 54 | 1 | -1.511985 | -1.273670 | 1.009597  |
| 55 | 6 | 0.470958  | 2.861030  | -2.680853 |
| 56 | 1 | 0.956377  | 3.632748  | -3.290637 |
| 57 | 1 | 0.602658  | 1.892283  | -3.169611 |
| 58 | 1 | -0.597484 | 3.090469  | -2.641492 |
| 59 | 6 | -2.580445 | -3.745713 | -1.579546 |
| 60 | 6 | -2.874682 | -2.314754 | -1.074883 |
| 61 | 1 | -2.029992 | -3.706176 | -2.524726 |
| 62 | 1 | -1.973534 | -4.295665 | -0.851003 |
| 63 | 1 | -3.515744 | -4.295819 | -1.737405 |
| 64 | 6 | -3.626495 | -2.370344 | 0.269498  |
| 65 | 6 | -3.721174 | -1.562144 | -2.124524 |
| 66 | 1 | -3.821436 | -1.365056 | 0.661381  |
| 67 | 1 | -4.590341 | -2.872808 | 0.129244  |
| 68 | 1 | -3.065086 | -2.931867 | 1.025725  |
| 69 | 1 | -4.667402 | -2.086231 | -2.303615 |
| 70 | 1 | -3.949897 | -0.545832 | -1.783271 |
| 71 | 1 | -3.171560 | -1.491816 | -3.068392 |
| 72 | 7 | -1.546300 | -1.615198 | -1.035002 |
| 73 | 6 | -1.012619 | -1.185703 | 0.027281  |

**TSM7a-8a** (E = -1199.300333 a.u.)

| Center Number | Atomic Number | Coordinates (Angstroms) |           |           |
|---------------|---------------|-------------------------|-----------|-----------|
|               |               | X                       | Y         | Z         |
| 1             | 22            | 0.970218                | -0.156976 | -0.293146 |
| 2             | 7             | 0.662961                | 1.739566  | -0.471228 |
| 3             | 6             | 1.489363                | -2.163349 | 1.105405  |
| 4             | 6             | 1.353779                | -1.022828 | 1.956546  |
| 5             | 6             | 2.588600                | -1.942584 | 0.247141  |
| 6             | 17            | 1.794520                | -0.486734 | -2.473208 |
| 7             | 6             | 2.393678                | -0.103182 | 1.634150  |
| 8             | 6             | 3.147463                | -0.663902 | 0.563387  |
| 9             | 6             | -0.632953               | 1.841947  | 0.043277  |
| 10            | 6             | 1.248751                | 2.926082  | -1.197887 |
| 11            | 6             | -0.999619               | 1.624758  | 1.339079  |
| 12            | 6             | -2.455079               | 1.681615  | 1.486447  |
| 13            | 1             | -0.310141               | 1.472422  | 2.155505  |
| 14            | 6             | -1.910095               | 2.074408  | -0.751862 |
| 15            | 6             | -3.007007               | 1.955579  | 0.277955  |
| 16            | 1             | -1.936510               | 3.055694  | -1.238275 |
| 17            | 1             | -1.995782               | 1.328512  | -1.549023 |
| 18            | 6             | -4.450089               | 2.187285  | -0.073109 |
| 19            | 6             | -3.142353               | 1.499306  | 2.815747  |
| 20            | 1             | -4.226605               | 1.621259  | 2.735942  |
| 21            | 1             | -2.775361               | 2.228556  | 3.550613  |
| 22            | 1             | -2.947381               | 0.500684  | 3.229032  |
| 23            | 1             | -5.106381               | 2.077592  | 0.795929  |
| 24            | 1             | -4.792871               | 1.481969  | -0.842875 |
| 25            | 1             | -4.600691               | 3.197169  | -0.480758 |
| 26            | 6             | 0.922219                | 4.224577  | -0.424001 |
| 27            | 6             | 2.779384                | 2.757916  | -1.252301 |

|    |   |           |           |           |
|----|---|-----------|-----------|-----------|
| 28 | 1 | -0.155293 | 4.412657  | -0.374983 |
| 29 | 1 | 1.304844  | 4.168705  | 0.601374  |
| 30 | 1 | 3.200577  | 2.734984  | -0.242642 |
| 31 | 1 | 3.052065  | 1.839346  | -1.775791 |
| 32 | 6 | 0.426043  | -0.955548 | 3.144989  |
| 33 | 6 | 0.699594  | -3.441897 | 1.217304  |
| 34 | 6 | 3.169314  | -2.935632 | -0.723816 |
| 35 | 6 | 4.441160  | -0.141892 | -0.007899 |
| 36 | 6 | 2.746287  | 1.140594  | 2.413459  |
| 37 | 1 | 0.695931  | -1.733888 | 3.872354  |
| 38 | 1 | -0.622803 | -1.117370 | 2.871444  |
| 39 | 1 | 0.494929  | 0.006543  | 3.660338  |
| 40 | 1 | 1.230460  | -4.159435 | 1.859499  |
| 41 | 1 | 0.554990  | -3.916621 | 0.241782  |
| 42 | 1 | -0.287469 | -3.275943 | 1.658834  |
| 43 | 1 | 3.945238  | -3.539338 | -0.230281 |
| 44 | 1 | 3.621514  | -2.435809 | -1.583849 |
| 45 | 1 | 2.406529  | -3.620271 | -1.107262 |
| 46 | 1 | 5.284123  | -0.726234 | 0.388157  |
| 47 | 1 | 4.613773  | 0.904563  | 0.254121  |
| 48 | 1 | 4.461590  | -0.226112 | -1.098896 |
| 49 | 1 | 3.369898  | 0.879448  | 3.280501  |
| 50 | 1 | 1.860734  | 1.661513  | 2.789760  |
| 51 | 1 | 3.308661  | 1.853541  | 1.805421  |
| 52 | 1 | 3.222699  | 3.606137  | -1.786594 |
| 53 | 1 | 1.392632  | 5.079736  | -0.922538 |
| 54 | 1 | -1.469710 | -1.405605 | 0.740328  |
| 55 | 6 | 0.704106  | 3.005547  | -2.645809 |
| 56 | 1 | 1.209212  | 3.815517  | -3.186164 |
| 57 | 1 | 0.889943  | 2.064148  | -3.169099 |
| 58 | 1 | -0.369811 | 3.210526  | -2.664990 |
| 59 | 6 | -2.112575 | -3.496651 | -2.296120 |
| 60 | 6 | -2.551433 | -2.161597 | -1.652636 |
| 61 | 1 | -1.449904 | -3.307068 | -3.146334 |
| 62 | 1 | -1.573056 | -4.116591 | -1.570883 |
| 63 | 1 | -2.987766 | -4.055960 | -2.647327 |
| 64 | 6 | -3.460031 | -2.427645 | -0.436881 |
| 65 | 6 | -3.297541 | -1.305404 | -2.698277 |
| 66 | 1 | -3.749925 | -1.492486 | 0.056785  |
| 67 | 1 | -4.373679 | -2.935529 | -0.765879 |
| 68 | 1 | -2.969394 | -3.070540 | 0.303434  |
| 69 | 1 | -4.179040 | -1.839622 | -3.071699 |
| 70 | 1 | -3.631295 | -0.357799 | -2.260012 |
| 71 | 1 | -2.637033 | -1.081501 | -3.541956 |
| 72 | 7 | -1.281637 | -1.425169 | -1.332227 |
| 73 | 6 | -0.887410 | -1.156436 | -0.163405 |

**M8a** (E = -1199.3125154 a.u.)

| Center Number | Atomic Number | Coordinates (Angstroms) |           |           |
|---------------|---------------|-------------------------|-----------|-----------|
|               |               | X                       | Y         | Z         |
| 1             | 22            | -0.731591               | -0.121609 | -0.049552 |
| 2             | 7             | -0.278580               | 1.918372  | -0.203223 |
| 3             | 6             | 0.260212                | 1.446784  | 0.828076  |
| 4             | 7             | 0.801028                | -1.102343 | -0.772532 |
| 5             | 6             | -2.275172               | 0.323673  | 1.882630  |
| 6             | 6             | -1.313149               | -0.682296 | 2.221476  |
| 7             | 6             | -3.081839               | -0.172432 | 0.843145  |
| 8             | 17            | -1.902766               | 0.179526  | -2.177260 |
| 9             | 6             | -1.574726               | -1.830859 | 1.416558  |
| 10            | 6             | -2.642554               | -1.506660 | 0.537455  |
| 11            | 6             | -0.298999               | 3.292796  | -0.797215 |
| 12            | 6             | 1.987884                | -0.677623 | -0.140140 |
| 13            | 6             | 0.993165                | -2.054641 | -1.946591 |
| 14            | 6             | 2.396846                | -0.942967 | 1.125862  |
| 15            | 1             | 0.884391                | 1.969989  | 1.556695  |

|    |   |           |           |           |
|----|---|-----------|-----------|-----------|
| 16 | 6 | 3.664418  | -0.264673 | 1.422417  |
| 17 | 1 | 1.872631  | -1.576650 | 1.827449  |
| 18 | 6 | 3.039046  | 0.233881  | -0.765896 |
| 19 | 6 | 4.060579  | 0.430404  | 0.328503  |
| 20 | 1 | 3.499075  | -0.205648 | -1.657286 |
| 21 | 1 | 2.587966  | 1.176932  | -1.094359 |
| 22 | 6 | 5.303273  | 1.251741  | 0.119771  |
| 23 | 6 | 4.358591  | -0.399713 | 2.753717  |
| 24 | 1 | 5.293996  | 0.167038  | 2.788668  |
| 25 | 1 | 4.594551  | -1.451055 | 2.967875  |
| 26 | 1 | 3.718018  | -0.042295 | 3.571500  |
| 27 | 1 | 5.928144  | 1.281752  | 1.018324  |
| 28 | 1 | 5.059485  | 2.288999  | -0.151417 |
| 29 | 1 | 5.916560  | 0.847240  | -0.698376 |
| 30 | 6 | -1.776909 | 3.729391  | -0.878927 |
| 31 | 6 | 0.516084  | 4.270187  | 0.068014  |
| 32 | 6 | 0.299613  | 3.181886  | -2.215617 |
| 33 | 1 | -0.251047 | 2.441468  | -2.800865 |
| 34 | 1 | 1.352870  | 2.882477  | -2.172720 |
| 35 | 1 | 1.563321  | 3.955603  | 0.146783  |
| 36 | 1 | 0.099930  | 4.351127  | 1.079088  |
| 37 | 1 | -2.213051 | 3.818839  | 0.122171  |
| 38 | 1 | -2.354421 | 3.000184  | -1.452611 |
| 39 | 6 | 2.181909  | -3.009933 | -1.678273 |
| 40 | 6 | -0.272572 | -2.919851 | -2.112541 |
| 41 | 6 | 1.231574  | -1.259583 | -3.253632 |
| 42 | 1 | 0.392256  | -0.584552 | -3.437634 |
| 43 | 1 | 2.152704  | -0.671006 | -3.205879 |
| 44 | 1 | 3.138793  | -2.483165 | -1.615220 |
| 45 | 1 | 2.034711  | -3.558083 | -0.741224 |
| 46 | 1 | -0.439183 | -3.530731 | -1.220644 |
| 47 | 1 | -1.151590 | -2.301119 | -2.297315 |
| 48 | 6 | -0.402663 | -0.630793 | 3.423245  |
| 49 | 6 | -2.433102 | 1.637576  | 2.603881  |
| 50 | 6 | -4.285555 | 0.492197  | 0.229834  |
| 51 | 6 | -3.380478 | -2.433275 | -0.393699 |
| 52 | 6 | -0.944947 | -3.188880 | 1.616413  |
| 53 | 1 | -0.993231 | -0.706918 | 4.347918  |
| 54 | 1 | 0.168995  | 0.302085  | 3.475235  |
| 55 | 1 | 0.311041  | -1.458975 | 3.423814  |
| 56 | 1 | -3.040161 | 1.506024  | 3.511091  |
| 57 | 1 | -2.930774 | 2.387459  | 1.981792  |
| 58 | 1 | -1.468105 | 2.049525  | 2.919388  |
| 59 | 1 | -5.209495 | 0.026422  | 0.602212  |
| 60 | 1 | -4.274248 | 0.399332  | -0.860324 |
| 61 | 1 | -4.329637 | 1.557721  | 0.476018  |
| 62 | 1 | -4.370500 | -2.671951 | 0.020957  |
| 63 | 1 | -2.848060 | -3.375996 | -0.543033 |
| 64 | 1 | -3.530990 | -1.970092 | -1.374352 |
| 65 | 1 | -1.273604 | -3.619230 | 2.572968  |
| 66 | 1 | 0.148613  | -3.147009 | 1.628224  |
| 67 | 1 | -1.237523 | -3.885489 | 0.826965  |
| 68 | 1 | 0.496010  | 5.266265  | -0.386416 |
| 69 | 1 | -1.845388 | 4.705752  | -1.371565 |
| 70 | 1 | 0.239918  | 4.154242  | -2.717401 |
| 71 | 1 | -0.141906 | -3.594657 | -2.967092 |
| 72 | 1 | 2.250988  | -3.736493 | -2.496096 |
| 73 | 1 | 1.319647  | -1.952124 | -4.100258 |

TSM8a-9a (E = -1199.2971545 a.u.)

| Center Number | Atomic Number | Coordinates (Angstroms) |   |   |
|---------------|---------------|-------------------------|---|---|
|               |               | X                       | Y | Z |



|    |    |           |           |           |
|----|----|-----------|-----------|-----------|
| 1  | 22 | -0.571511 | -0.362104 | 0.102567  |
| 2  | 7  | -1.930066 | 0.982321  | -0.393046 |
| 3  | 6  | -2.104262 | 0.725379  | 0.866617  |
| 4  | 7  | 0.811368  | 1.067419  | 0.905166  |
| 5  | 6  | -2.048710 | -2.275000 | 0.470352  |
| 6  | 6  | -1.330305 | -1.996429 | 1.677425  |
| 7  | 6  | -1.117493 | -2.692870 | -0.504524 |
| 8  | 17 | 0.198348  | -0.264082 | -2.221148 |
| 9  | 6  | 0.047967  | -2.278377 | 1.446059  |
| 10 | 6  | 0.186703  | -2.685365 | 0.089202  |
| 11 | 6  | -2.727612 | 1.800728  | -1.354335 |
| 12 | 6  | 0.175239  | 2.014428  | 1.598015  |
| 13 | 6  | 2.269442  | 1.268081  | 0.514031  |
| 14 | 6  | -1.013407 | 1.765560  | 2.324270  |
| 15 | 1  | -3.042374 | 0.761302  | 1.414567  |
| 16 | 6  | -1.571212 | 3.052324  | 2.784992  |
| 17 | 1  | -1.101900 | 0.880159  | 2.937857  |
| 18 | 6  | 0.363535  | 3.532098  | 1.552348  |
| 19 | 6  | -0.813580 | 4.073914  | 2.333619  |
| 20 | 1  | 1.309660  | 3.874150  | 1.981457  |
| 21 | 1  | 0.355983  | 3.875361  | 0.512734  |
| 22 | 6  | -0.984598 | 5.554458  | 2.536101  |
| 23 | 6  | -2.809780 | 3.114603  | 3.640087  |
| 24 | 1  | -3.056963 | 4.139070  | 3.934244  |
| 25 | 1  | -2.679028 | 2.522584  | 4.556644  |
| 26 | 1  | -3.679045 | 2.698975  | 3.112229  |
| 27 | 1  | -1.861868 | 5.783896  | 3.149357  |
| 28 | 1  | -1.102107 | 6.081563  | 1.577997  |
| 29 | 1  | -0.105934 | 5.992346  | 3.032215  |
| 30 | 6  | -3.268499 | 0.860986  | -2.453875 |
| 31 | 6  | -3.894106 | 2.495737  | -0.624240 |
| 32 | 6  | -1.783876 | 2.854263  | -1.974742 |
| 33 | 1  | -0.933552 | 2.360884  | -2.451874 |
| 34 | 1  | -1.409349 | 3.535210  | -1.201986 |
| 35 | 1  | -3.524528 | 3.137448  | 0.183747  |
| 36 | 1  | -4.590348 | 1.763878  | -0.197938 |
| 37 | 1  | -3.949989 | 0.117537  | -2.024289 |
| 38 | 1  | -2.444168 | 0.339565  | -2.946184 |
| 39 | 6  | 3.103375  | 1.704107  | 1.745830  |
| 40 | 6  | 2.834725  | -0.092583 | 0.057451  |
| 41 | 6  | 2.419549  | 2.276976  | -0.649450 |
| 42 | 1  | 1.775436  | 1.986154  | -1.483806 |
| 43 | 1  | 2.176767  | 3.299080  | -0.349101 |
| 44 | 1  | 2.847807  | 2.701422  | 2.108378  |
| 45 | 1  | 2.965341  | 0.993021  | 2.568277  |
| 46 | 1  | 2.763979  | -0.826225 | 0.864207  |
| 47 | 1  | 2.309863  | -0.466057 | -0.822555 |
| 48 | 6  | -1.950349 | -1.739105 | 3.027288  |
| 49 | 6  | -3.548709 | -2.239623 | 0.322783  |
| 50 | 6  | -1.428082 | -3.198916 | -1.888405 |
| 51 | 6  | 1.418187  | -3.221328 | -0.595106 |
| 52 | 6  | 1.106392  | -2.300810 | 2.524595  |
| 53 | 1  | -2.255902 | -2.688822 | 3.490747  |
| 54 | 1  | -2.842754 | -1.108819 | 2.958750  |
| 55 | 1  | -1.246421 | -1.257086 | 3.713580  |
| 56 | 1  | -3.991867 | -3.178166 | 0.685490  |
| 57 | 1  | -3.850632 | -2.114629 | -0.721297 |
| 58 | 1  | -3.996695 | -1.424279 | 0.900648  |
| 59 | 1  | -1.445780 | -4.298720 | -1.892966 |
| 60 | 1  | -0.677979 | -2.865322 | -2.610021 |
| 61 | 1  | -2.403889 | -2.849641 | -2.239436 |
| 62 | 1  | 1.307001  | -4.298551 | -0.783217 |
| 63 | 1  | 2.317996  | -3.083315 | 0.010209  |
| 64 | 1  | 1.580417  | -2.730660 | -1.561199 |

|    |   |           |           |           |
|----|---|-----------|-----------|-----------|
| 65 | 1 | 0.880071  | -3.086839 | 3.258379  |
| 66 | 1 | 1.171083  | -1.351540 | 3.068074  |
| 67 | 1 | 2.095890  | -2.516297 | 2.113060  |
| 68 | 1 | -4.452033 | 3.119802  | -1.330905 |
| 69 | 1 | -3.820738 | 1.442247  | -3.201660 |
| 70 | 1 | -2.322149 | 3.446636  | -2.724428 |
| 71 | 1 | 3.893314  | 0.024771  | -0.201189 |
| 72 | 1 | 4.165620  | 1.713553  | 1.476977  |
| 73 | 1 | 3.458970  | 2.273541  | -0.998647 |

**M9a** (E = -1199.3296348 a.u.)

| Center Number | Atomic Number | Coordinates (Angstroms) |           |           |
|---------------|---------------|-------------------------|-----------|-----------|
|               |               | X                       | Y         | Z         |
| 1             | 22            | 0.877953                | -0.083393 | -0.125737 |
| 2             | 7             | -0.332591               | -1.448272 | -0.544534 |
| 3             | 6             | -0.698890               | -1.136659 | 0.764916  |
| 4             | 7             | -0.760430               | 1.581490  | -0.051058 |
| 5             | 6             | 2.446430                | -1.338039 | 1.147355  |
| 6             | 6             | 1.875483                | -0.370414 | 2.030455  |
| 7             | 6             | 3.215177                | -0.638850 | 0.177091  |
| 8             | 17            | 1.431319                | 0.399340  | -2.435857 |
| 9             | 6             | 2.312148                | 0.921390  | 1.608808  |
| 10            | 6             | 3.142349                | 0.755504  | 0.467161  |
| 11            | 6             | -0.755333               | -2.610690 | -1.370752 |
| 12            | 6             | -1.862499               | 1.083008  | 0.379546  |
| 13            | 6             | -0.720303               | 2.942818  | -0.743395 |
| 14            | 6             | -1.869163               | -0.224587 | 1.137806  |
| 15            | 1             | -0.521242               | -1.895763 | 1.530691  |
| 16            | 6             | -3.327421               | -0.669929 | 1.075960  |
| 17            | 1             | -1.670069               | 0.042245  | 2.191831  |
| 18            | 6             | -3.307318               | 1.532214  | 0.218560  |
| 19            | 6             | -4.106950               | 0.294502  | 0.567256  |
| 20            | 1             | -3.542548               | 2.342340  | 0.920497  |
| 21            | 1             | -3.523469               | 1.916314  | -0.780775 |
| 22            | 6             | -5.600032               | 0.309263  | 0.377989  |
| 23            | 6             | -3.754038               | -1.987186 | 1.661904  |
| 24            | 1             | -4.841407               | -2.107303 | 1.657236  |
| 25            | 1             | -3.408057               | -2.073921 | 2.702033  |
| 26            | 1             | -3.320150               | -2.831564 | 1.114444  |
| 27            | 1             | -6.066743               | -0.629711 | 0.689029  |
| 28            | 1             | -5.857981               | 0.478934  | -0.677012 |
| 29            | 1             | -6.062469               | 1.124089  | 0.953693  |
| 30            | 6             | 0.295213                | -2.870143 | -2.468619 |
| 31            | 6             | -0.896023               | -3.883038 | -0.503089 |
| 32            | 6             | -2.112779               | -2.265320 | -2.032580 |
| 33            | 1             | -2.000287               | -1.385106 | -2.674212 |
| 34            | 1             | -2.874100               | -2.046081 | -1.276907 |
| 35            | 1             | -1.625557               | -3.746660 | 0.300596  |
| 36            | 1             | 0.064726                | -4.152325 | -0.051945 |
| 37            | 1             | 1.267982                | -3.109578 | -2.024160 |
| 38            | 1             | 0.423185                | -1.990903 | -3.102148 |
| 39            | 6             | -1.538670               | 4.012459  | 0.024888  |
| 40            | 6             | 0.745001                | 3.421429  | -0.754087 |
| 41            | 6             | -1.217951               | 2.803588  | -2.200928 |
| 42            | 1             | -0.605321               | 2.079697  | -2.742571 |
| 43            | 1             | -2.263156               | 2.484900  | -2.250923 |
| 44            | 1             | -2.615019               | 3.930154  | -0.132910 |
| 45            | 1             | -1.332831               | 3.964516  | 1.100787  |
| 46            | 1             | 1.103688                | 3.589042  | 0.264701  |
| 47            | 1             | 1.391932                | 2.701847  | -1.255588 |
| 48            | 6             | 1.197145                | -0.648451 | 3.348466  |
| 49            | 6             | 2.395515                | -2.833827 | 1.335695  |
| 50            | 6             | 4.074973                | -1.252874 | -0.898244 |
| 51            | 6             | 3.921960                | 1.814065  | -0.269986 |
| 52            | 6             | 2.069759                | 2.188326  | 2.395843  |

|    |   |           |           |           |
|----|---|-----------|-----------|-----------|
| 53 | 1 | 1.928087  | -0.592872 | 4.169252  |
| 54 | 1 | 0.749685  | -1.645759 | 3.375711  |
| 55 | 1 | 0.407866  | 0.079732  | 3.566156  |
| 56 | 1 | 3.174333  | -3.156923 | 2.041860  |
| 57 | 1 | 2.563132  | -3.367229 | 0.395341  |
| 58 | 1 | 1.432257  | -3.162541 | 1.738037  |
| 59 | 1 | 5.115419  | -1.338849 | -0.551601 |
| 60 | 1 | 4.067275  | -0.646085 | -1.807712 |
| 61 | 1 | 3.732572  | -2.256688 | -1.168483 |
| 62 | 1 | 5.000134  | 1.672848  | -0.110860 |
| 63 | 1 | 3.666843  | 2.821578  | 0.070548  |
| 64 | 1 | 3.736623  | 1.764093  | -1.349009 |
| 65 | 1 | 2.514178  | 2.101640  | 3.397206  |
| 66 | 1 | 1.002642  | 2.400824  | 2.531675  |
| 67 | 1 | 2.525079  | 3.056753  | 1.912279  |
| 68 | 1 | -1.228180 | -4.721584 | -1.126074 |
| 69 | 1 | -0.018366 | -3.718548 | -3.088880 |
| 70 | 1 | -2.463370 | -3.103819 | -2.647257 |
| 71 | 1 | 0.808325  | 4.371279  | -1.296710 |
| 72 | 1 | -1.235671 | 5.003565  | -0.329005 |
| 73 | 1 | -1.138894 | 3.775419  | -2.702057 |

**M10** (E = -1199.3110758 a.u.)

| Center Number | Atomic Number | Coordinates (Angstroms) |           |           |
|---------------|---------------|-------------------------|-----------|-----------|
|               |               | X                       | Y         | Z         |
| 1             | 22            | 1.678618                | -0.267901 | -0.417038 |
| 2             | 7             | 0.180628                | -1.312868 | -0.256650 |
| 3             | 6             | -0.325083               | -0.054701 | 0.144625  |
| 4             | 7             | -3.536840               | -0.397071 | -0.393256 |
| 5             | 6             | 2.494242                | -0.300567 | 1.794391  |
| 6             | 6             | 2.363546                | 1.077252  | 1.431107  |
| 7             | 6             | 3.504211                | -0.874877 | 0.972334  |
| 8             | 17            | 2.118716                | 0.009221  | -2.689965 |
| 9             | 6             | 3.314534                | 1.348900  | 0.399432  |
| 10            | 6             | 4.010163                | 0.145447  | 0.110106  |
| 11            | 6             | -0.420000               | -2.671906 | -0.278049 |
| 12            | 6             | -2.794164               | 0.591727  | -0.121792 |
| 13            | 6             | -4.941518               | -0.578059 | 0.085023  |
| 14            | 6             | -1.372430               | 0.711481  | -0.708740 |
| 15            | 1             | -0.536529               | 0.060352  | 1.214745  |
| 16            | 6             | -1.154239               | 2.218167  | -0.683188 |
| 17            | 1             | -1.346305               | 0.310532  | -1.725913 |
| 18            | 6             | -3.058751               | 1.874357  | 0.672407  |
| 19            | 6             | -2.048800               | 2.842022  | 0.098883  |
| 20            | 1             | -4.083768               | 2.235620  | 0.557408  |
| 21            | 1             | -2.906408               | 1.714288  | 1.748911  |
| 22            | 6             | -2.160029               | 4.307505  | 0.425244  |
| 23            | 6             | -0.047553               | 2.842638  | -1.483611 |
| 24            | 1             | 0.000196                | 3.927815  | -1.351774 |
| 25            | 1             | -0.177716               | 2.631237  | -2.553232 |
| 26            | 1             | 0.931448                | 2.428706  | -1.212140 |
| 27            | 1             | -1.376060               | 4.903762  | -0.050644 |
| 28            | 1             | -2.096685               | 4.471189  | 1.510878  |
| 29            | 1             | -3.131455               | 4.707917  | 0.101581  |
| 30            | 6             | 0.738785                | -3.685130 | -0.393694 |
| 31            | 6             | -1.218160               | -2.924485 | 1.018341  |
| 32            | 6             | -1.339120               | -2.800609 | -1.515956 |
| 33            | 1             | -0.768205               | -2.601285 | -2.429568 |
| 34            | 1             | -2.172757               | -2.096745 | -1.450680 |
| 35            | 1             | -2.036926               | -2.205383 | 1.109501  |
| 36            | 1             | -0.570311               | -2.838788 | 1.898224  |
| 37            | 1             | 1.397827                | -3.628436 | 0.479454  |
| 38            | 1             | 1.328537                | -3.493995 | -1.298287 |
| 39            | 6             | -5.880737               | 0.342231  | -0.731010 |
| 40            | 6             | -5.293704               | -2.050690 | -0.230215 |

|    |   |           |           |           |
|----|---|-----------|-----------|-----------|
| 41 | 6 | -5.117221 | -0.348058 | 1.605502  |
| 42 | 1 | -4.372989 | -0.924251 | 2.167928  |
| 43 | 1 | -5.024237 | 0.703737  | 1.886487  |
| 44 | 1 | -5.688211 | 1.401236  | -0.532326 |
| 45 | 1 | -5.744317 | 0.164943  | -1.803292 |
| 46 | 1 | -5.160319 | -2.250287 | -1.298321 |
| 47 | 1 | -4.638297 | -2.729211 | 0.326714  |
| 48 | 6 | 1.532919  | 2.099745  | 2.166017  |
| 49 | 6 | 1.789014  | -0.963686 | 2.951121  |
| 50 | 6 | 4.043177  | -2.284238 | 1.050545  |
| 51 | 6 | 5.152674  | 0.003152  | -0.862480 |
| 52 | 6 | 3.610765  | 2.687286  | -0.231920 |
| 53 | 1 | 2.109741  | 2.534470  | 2.995178  |
| 54 | 1 | 0.628237  | 1.654405  | 2.589746  |
| 55 | 1 | 1.218657  | 2.919603  | 1.513544  |
| 56 | 1 | 2.280577  | -0.701659 | 3.898714  |
| 57 | 1 | 1.801086  | -2.053802 | 2.863414  |
| 58 | 1 | 0.743349  | -0.648942 | 3.027118  |
| 59 | 1 | 5.025743  | -2.285879 | 1.542493  |
| 60 | 1 | 4.178036  | -2.734055 | 0.059971  |
| 61 | 1 | 3.385839  | -2.939445 | 1.628331  |
| 62 | 1 | 6.092528  | 0.338539  | -0.400646 |
| 63 | 1 | 4.988749  | 0.600218  | -1.764402 |
| 64 | 1 | 5.291233  | -1.036309 | -1.175611 |
| 65 | 1 | 4.569444  | 3.077702  | 0.137279  |
| 66 | 1 | 2.842297  | 3.428150  | 0.006241  |
| 67 | 1 | 3.684545  | 2.614345  | -1.322785 |
| 68 | 1 | -1.645839 | -3.933903 | 1.003427  |
| 69 | 1 | 0.345002  | -4.705770 | -0.458126 |
| 70 | 1 | -1.743942 | -3.819127 | -1.573593 |
| 71 | 1 | -6.332968 | -2.268457 | 0.042287  |
| 72 | 1 | -6.926434 | 0.132740  | -0.477213 |
| 73 | 1 | -6.111787 | -0.688582 | 1.916029  |

**TSM10-11** (E = -1199.2861808 a.u.)

| Center Number | Atomic Number | Coordinates (Angstroms) |           |           |
|---------------|---------------|-------------------------|-----------|-----------|
|               |               | X                       | Y         | Z         |
| 1             | 22            | 1.012038                | -0.047417 | -0.214004 |
| 2             | 7             | 0.282992                | -0.888331 | 1.345036  |
| 3             | 6             | -0.323343               | 0.337992  | 1.493305  |
| 4             | 7             | -2.471663               | -1.110521 | -0.130661 |
| 5             | 6             | 3.261432                | 0.349082  | 0.339291  |
| 6             | 6             | 2.579211                | 1.590629  | 0.513625  |
| 7             | 6             | 3.246620                | 0.039664  | -1.054324 |
| 8             | 17            | 0.584848                | -1.611796 | -1.908556 |
| 9             | 6             | 2.143983                | 2.040370  | -0.772920 |
| 10            | 6             | 2.561550                | 1.081740  | -1.736872 |
| 11            | 6             | 0.415834                | -1.874309 | 2.443671  |
| 12            | 6             | -2.218534               | 0.105093  | -0.334716 |
| 13            | 6             | -3.547289               | -1.886054 | -0.819538 |
| 14            | 6             | -1.131102               | 0.871284  | 0.440231  |
| 15            | 1             | -0.092419               | 0.976958  | 2.346818  |
| 16            | 6             | -1.691701               | 2.267736  | 0.528538  |
| 17            | 1             | -0.263949               | 1.010561  | -0.766901 |
| 18            | 6             | -2.910235               | 1.177867  | -1.177705 |
| 19            | 6             | -2.665352               | 2.439657  | -0.383647 |
| 20            | 1             | -2.456100               | 1.235588  | -2.177185 |
| 21            | 1             | -3.973354               | 0.986225  | -1.321906 |
| 22            | 6             | -3.488718               | 3.665931  | -0.663038 |
| 23            | 6             | -1.244911               | 3.257455  | 1.571128  |
| 24            | 1             | -1.706846               | 4.236506  | 1.417045  |
| 25            | 1             | -0.159670               | 3.393427  | 1.572805  |
| 26            | 1             | -1.523924               | 2.914406  | 2.576822  |
| 27            | 1             | -3.194407               | 4.522047  | -0.049750 |
| 28            | 1             | -4.554839               | 3.470054  | -0.480848 |

|    |   |           |           |           |
|----|---|-----------|-----------|-----------|
| 29 | 1 | -3.397182 | 3.958057  | -1.718727 |
| 30 | 6 | 1.293136  | -3.028542 | 1.924668  |
| 31 | 6 | 1.049756  | -1.235044 | 3.702593  |
| 32 | 6 | -0.992104 | -2.407812 | 2.798809  |
| 33 | 1 | -1.463019 | -2.844834 | 1.916601  |
| 34 | 1 | -1.633223 | -1.592531 | 3.152926  |
| 35 | 1 | 0.427548  | -0.422097 | 4.094381  |
| 36 | 1 | 2.045974  | -0.839474 | 3.484557  |
| 37 | 1 | 2.299890  | -2.674941 | 1.679513  |
| 38 | 1 | 0.851542  | -3.461268 | 1.021680  |
| 39 | 6 | -3.522332 | -1.713965 | -2.357752 |
| 40 | 6 | -3.254617 | -3.368586 | -0.492193 |
| 41 | 6 | -4.925137 | -1.506355 | -0.226661 |
| 42 | 1 | -4.914320 | -1.624113 | 0.862661  |
| 43 | 1 | -5.200932 | -0.472206 | -0.456447 |
| 44 | 1 | -3.859962 | -0.724571 | -2.677334 |
| 45 | 1 | -2.507493 | -1.874845 | -2.736600 |
| 46 | 1 | -2.260770 | -3.644616 | -0.858595 |
| 47 | 1 | -3.278707 | -3.530960 | 0.590250  |
| 48 | 6 | 2.586124  | 2.387842  | 1.796770  |
| 49 | 6 | 4.113565  | -0.340536 | 1.376706  |
| 50 | 6 | 3.951087  | -1.126238 | -1.699718 |
| 51 | 6 | 2.353354  | 1.170395  | -3.226315 |
| 52 | 6 | 1.519458  | 3.376047  | -1.097895 |
| 53 | 1 | 3.595542  | 2.779533  | 1.987935  |
| 54 | 1 | 2.301042  | 1.785407  | 2.665884  |
| 55 | 1 | 1.911781  | 3.246485  | 1.748908  |
| 56 | 1 | 5.145337  | 0.038824  | 1.328261  |
| 57 | 1 | 4.158743  | -1.422898 | 1.222019  |
| 58 | 1 | 3.747318  | -0.161677 | 2.391031  |
| 59 | 1 | 4.991125  | -0.856492 | -1.934856 |
| 60 | 1 | 3.459035  | -1.427918 | -2.627553 |
| 61 | 1 | 3.976455  | -2.001030 | -1.042091 |
| 62 | 1 | 3.245928  | 1.581029  | -3.719886 |
| 63 | 1 | 1.508171  | 1.819620  | -3.476274 |
| 64 | 1 | 2.151844  | 0.185023  | -3.657056 |
| 65 | 1 | 2.292982  | 4.085705  | -1.424438 |
| 66 | 1 | 1.015039  | 3.816430  | -0.234767 |
| 67 | 1 | 0.783669  | 3.296087  | -1.904251 |
| 68 | 1 | 1.146157  | -1.989021 | 4.492156  |
| 69 | 1 | 1.380028  | -3.812429 | 2.685477  |
| 70 | 1 | -0.918954 | -3.164662 | 3.588968  |
| 71 | 1 | -3.999229 | -4.022699 | -0.960778 |
| 72 | 1 | -4.184320 | -2.455640 | -2.819506 |
| 73 | 1 | -5.701116 | -2.163618 | -0.635856 |

**M11** (E = -1199.2996804 a.u.)

| Center Number | Atomic Number | Coordinates (Angstroms) |           |           |
|---------------|---------------|-------------------------|-----------|-----------|
|               |               | X                       | Y         | Z         |
| 1             | 22            | 0.956665                | -0.145739 | -0.335736 |
| 2             | 7             | 0.305045                | -0.840555 | 1.340430  |
| 3             | 6             | -0.367874               | 0.310566  | 1.712215  |
| 4             | 7             | -2.495126               | -0.975276 | -0.107958 |
| 5             | 6             | 3.142040                | 0.519042  | 0.314242  |
| 6             | 6             | 2.381133                | 1.698901  | 0.071483  |
| 7             | 6             | 3.283246                | -0.165111 | -0.927624 |
| 8             | 17            | 0.640357                | -1.944948 | -1.764272 |
| 9             | 6             | 2.081942                | 1.760101  | -1.325927 |
| 10            | 6             | 2.643381                | 0.609662  | -1.939087 |
| 11            | 6             | 0.539516                | -1.921180 | 2.345124  |
| 12            | 6             | -2.301703               | 0.273718  | -0.032886 |
| 13            | 6             | -3.458317               | -1.638334 | -1.033641 |
| 14            | 6             | -1.391899               | 0.884554  | 1.000938  |
| 15            | 1             | -0.004213               | 0.854191  | 2.587358  |
| 16            | 6             | -1.892373               | 2.249634  | 1.231638  |

|    |   |           |           |           |
|----|---|-----------|-----------|-----------|
| 17 | 1 | -0.077925 | 0.847343  | -1.195554 |
| 18 | 6 | -2.997905 | 1.460413  | -0.705557 |
| 19 | 6 | -2.787269 | 2.587068  | 0.275487  |
| 20 | 1 | -2.522862 | 1.683900  | -1.669934 |
| 21 | 1 | -4.056187 | 1.280892  | -0.901677 |
| 22 | 6 | -3.529664 | 3.880156  | 0.097964  |
| 23 | 6 | -1.460229 | 3.088070  | 2.407415  |
| 24 | 1 | -1.956691 | 4.062150  | 2.412686  |
| 25 | 1 | -0.378432 | 3.262656  | 2.408719  |
| 26 | 1 | -1.705831 | 2.583455  | 3.351605  |
| 27 | 1 | -3.272682 | 4.624195  | 0.856992  |
| 28 | 1 | -4.615569 | 3.713865  | 0.139953  |
| 29 | 1 | -3.316682 | 4.314332  | -0.889398 |
| 30 | 6 | 1.509704  | -2.948615 | 1.733508  |
| 31 | 6 | 1.115945  | -1.369642 | 3.671523  |
| 32 | 6 | -0.821714 | -2.604685 | 2.624363  |
| 33 | 1 | -1.250643 | -2.985356 | 1.694725  |
| 34 | 1 | -1.532098 | -1.889296 | 3.053665  |
| 35 | 1 | 0.418454  | -0.680957 | 4.161343  |
| 36 | 1 | 2.064451  | -0.850420 | 3.507513  |
| 37 | 1 | 2.490839  | -2.502201 | 1.541203  |
| 38 | 1 | 1.115768  | -3.331773 | 0.788258  |
| 39 | 6 | -3.335789 | -1.149233 | -2.497153 |
| 40 | 6 | -3.094274 | -3.140867 | -0.986849 |
| 41 | 6 | -4.899603 | -1.458337 | -0.497561 |
| 42 | 1 | -4.961833 | -1.799063 | 0.542001  |
| 43 | 1 | -5.225760 | -0.414039 | -0.536567 |
| 44 | 1 | -3.709041 | -0.130699 | -2.633819 |
| 45 | 1 | -2.289712 | -1.186065 | -2.818247 |
| 46 | 1 | -2.062968 | -3.286244 | -1.322060 |
| 47 | 1 | -3.177800 | -3.516237 | 0.038726  |
| 48 | 6 | 2.142794  | 2.814419  | 1.058383  |
| 49 | 6 | 3.883389  | 0.202062  | 1.588600  |
| 50 | 6 | 4.086148  | -1.419148 | -1.161072 |
| 51 | 6 | 2.615438  | 0.291308  | -3.410393 |
| 52 | 6 | 1.457300  | 2.931847  | -2.041104 |
| 53 | 1 | 2.988459  | 3.517583  | 1.045581  |
| 54 | 1 | 2.041659  | 2.444297  | 2.083238  |
| 55 | 1 | 1.241660  | 3.383372  | 0.812702  |
| 56 | 1 | 4.890725  | 0.642133  | 1.550935  |
| 57 | 1 | 4.004627  | -0.873343 | 1.745313  |
| 58 | 1 | 3.380000  | 0.615422  | 2.466935  |
| 59 | 1 | 5.107812  | -1.162385 | -1.476194 |
| 60 | 1 | 3.638497  | -2.041582 | -1.940785 |
| 61 | 1 | 4.163369  | -2.027566 | -0.254706 |
| 62 | 1 | 3.485925  | 0.733001  | -3.916701 |
| 63 | 1 | 1.714200  | 0.686008  | -3.890119 |
| 64 | 1 | 2.633060  | -0.787635 | -3.585210 |
| 65 | 1 | 2.226935  | 3.672423  | -2.303058 |
| 66 | 1 | 0.708368  | 3.432226  | -1.420252 |
| 67 | 1 | 0.964706  | 2.619830  | -2.966441 |
| 68 | 1 | 1.296847  | -2.200814 | 4.362468  |
| 69 | 1 | 1.648455  | -3.788282 | 2.423779  |
| 70 | 1 | -0.688905 | -3.432100 | 3.331995  |
| 71 | 1 | -3.764939 | -3.722811 | -1.630194 |
| 72 | 1 | -3.919051 | -1.807016 | -3.152153 |
| 73 | 1 | -5.597295 | -2.054404 | -1.097286 |

TSM11-19 (E = -1199.2913712 a.u.)

| Center Number | Atomic Number | Coordinates (Angstroms) |   |   |
|---------------|---------------|-------------------------|---|---|
|               |               | X                       | Y | Z |

|    |    |           |           |           |
|----|----|-----------|-----------|-----------|
| 1  | 22 | 0.782641  | -0.103788 | -0.235918 |
| 2  | 7  | 0.448253  | -1.233202 | 1.340639  |
| 3  | 6  | -0.376696 | -0.529330 | 2.179622  |
| 4  | 7  | -1.589888 | 0.088096  | -0.560817 |
| 5  | 6  | 3.057831  | 0.414196  | 0.477412  |
| 6  | 6  | 2.329771  | 1.626373  | 0.318631  |
| 7  | 6  | 3.175478  | -0.194856 | -0.797523 |
| 8  | 17 | 0.640779  | -1.933877 | -1.870823 |
| 9  | 6  | 2.077342  | 1.815574  | -1.081060 |
| 10 | 6  | 2.574073  | 0.688067  | -1.761952 |
| 11 | 6  | 0.827588  | -2.614159 | 1.845757  |
| 12 | 6  | -2.180777 | 0.301446  | 0.570256  |
| 13 | 6  | -2.305231 | 0.120736  | -1.901287 |
| 14 | 6  | -1.501286 | 0.189812  | 1.864780  |
| 15 | 1  | -0.155789 | -0.596289 | 3.242660  |
| 16 | 6  | -2.367887 | 0.786940  | 2.897041  |
| 17 | 1  | 0.082550  | 1.349367  | 0.087479  |
| 18 | 6  | -3.600205 | 0.782764  | 0.894841  |
| 19 | 6  | -3.568688 | 1.095053  | 2.369020  |
| 20 | 1  | -3.874973 | 1.668195  | 0.324236  |
| 21 | 1  | -4.345844 | 0.011676  | 0.662946  |
| 22 | 6  | -4.788671 | 1.657061  | 3.042467  |
| 23 | 6  | -1.936910 | 0.937371  | 4.332562  |
| 24 | 1  | -2.681500 | 1.480439  | 4.921069  |
| 25 | 1  | -0.986541 | 1.482284  | 4.403465  |
| 26 | 1  | -1.786560 | -0.040118 | 4.811231  |
| 27 | 1  | -4.615143 | 1.879821  | 4.099307  |
| 28 | 1  | -5.631000 | 0.952315  | 2.983308  |
| 29 | 1  | -5.117706 | 2.584214  | 2.551430  |
| 30 | 6  | 2.063670  | -3.148121 | 1.104602  |
| 31 | 6  | 1.122924  | -2.639919 | 3.367947  |
| 32 | 6  | -0.383485 | -3.530728 | 1.537400  |
| 33 | 1  | -0.564364 | -3.559442 | 0.459302  |
| 34 | 1  | -1.287160 | -3.159437 | 2.034470  |
| 35 | 1  | 0.228003  | -2.483517 | 3.978811  |
| 36 | 1  | 1.873968  | -1.890138 | 3.641395  |
| 37 | 1  | 2.961694  | -2.595698 | 1.387075  |
| 38 | 1  | 1.927496  | -3.085822 | 0.024767  |
| 39 | 6  | -3.521393 | 1.078995  | -2.020709 |
| 40 | 6  | -1.290186 | 0.606035  | -2.962116 |
| 41 | 6  | -2.776818 | -1.322082 | -2.201061 |
| 42 | 1  | -1.932752 | -2.012743 | -2.183353 |
| 43 | 1  | -3.515438 | -1.644506 | -1.456845 |
| 44 | 1  | -4.405927 | 0.724845  | -1.489145 |
| 45 | 1  | -3.274575 | 2.093400  | -1.689158 |
| 46 | 1  | -0.994002 | 1.640434  | -2.753016 |
| 47 | 1  | -0.405531 | -0.028096 | -2.989727 |
| 48 | 6  | 2.098007  | 2.647928  | 1.402844  |
| 49 | 6  | 3.725235  | 0.003137  | 1.767015  |
| 50 | 6  | 4.001589  | -1.394373 | -1.180305 |
| 51 | 6  | 2.633163  | 0.478583  | -3.252315 |
| 52 | 6  | 1.478850  | 3.057691  | -1.690000 |
| 53 | 1  | 2.983906  | 3.289262  | 1.524161  |
| 54 | 1  | 1.900958  | 2.172222  | 2.369444  |
| 55 | 1  | 1.244549  | 3.291764  | 1.170721  |
| 56 | 1  | 4.457805  | 0.766472  | 2.063923  |
| 57 | 1  | 4.263256  | -0.942098 | 1.662988  |
| 58 | 1  | 3.012677  | -0.104023 | 2.591719  |
| 59 | 1  | 4.850436  | -1.082224 | -1.805097 |
| 60 | 1  | 3.410555  | -2.114611 | -1.756381 |
| 61 | 1  | 4.407001  | -1.909876 | -0.306013 |
| 62 | 1  | 3.651208  | 0.671167  | -3.621128 |
| 63 | 1  | 1.955837  | 1.151913  | -3.786447 |
| 64 | 1  | 2.366521  | -0.548947 | -3.516946 |

|    |   |           |           |           |
|----|---|-----------|-----------|-----------|
| 65 | 1 | 2.229738  | 3.859456  | -1.735352 |
| 66 | 1 | 0.632542  | 3.427469  | -1.101402 |
| 67 | 1 | 1.126098  | 2.880872  | -2.710261 |
| 68 | 1 | 1.522164  | -3.626346 | 3.627114  |
| 69 | 1 | 2.216658  | -4.199135 | 1.376210  |
| 70 | 1 | -0.187050 | -4.549738 | 1.892348  |
| 71 | 1 | -1.757006 | 0.579898  | -3.953313 |
| 72 | 1 | -3.788435 | 1.137397  | -3.081530 |
| 73 | 1 | -3.248211 | -1.359113 | -3.190759 |

**M19** (E = -1199.2976994 a.u.)

| Center Number | Atomic Number | Coordinates (Angstroms) |           |           |
|---------------|---------------|-------------------------|-----------|-----------|
|               |               | X                       | Y         | Z         |
| 1             | 22            | -0.815172               | -0.151827 | -0.030131 |
| 2             | 7             | 0.042226                | 1.790954  | -0.364902 |
| 3             | 6             | 1.330527                | 1.863126  | -0.079688 |
| 4             | 7             | 0.988831                | -1.179562 | -0.496395 |
| 5             | 6             | -2.362942               | 0.481897  | 1.710036  |
| 6             | 6             | -1.457750               | -0.512486 | 2.205823  |
| 7             | 6             | -3.162775               | -0.115097 | 0.701131  |
| 8             | 17            | -1.619321               | -0.047673 | -2.371539 |
| 9             | 6             | -1.718772               | -1.727502 | 1.500700  |
| 10            | 6             | -2.758966               | -1.473994 | 0.558237  |
| 11            | 6             | 2.097856                | -0.559598 | -0.070718 |
| 12            | 6             | 2.227722                | 0.825695  | 0.223561  |
| 13            | 1             | 1.799166                | 2.842456  | -0.128971 |
| 14            | 6             | 3.608179                | 1.101108  | 0.677413  |
| 15            | 1             | 0.190329                | 0.194725  | 1.201368  |
| 16            | 6             | 3.480584                | -1.170206 | 0.173437  |
| 17            | 6             | 4.334252                | -0.033197 | 0.666001  |
| 18            | 1             | 3.412736                | -1.973464 | 0.913175  |
| 19            | 1             | 3.910198                | -1.613583 | -0.729284 |
| 20            | 6             | 5.773497                | -0.259263 | 1.038173  |
| 21            | 6             | 4.073114                | 2.477294  | 1.080126  |
| 22            | 1             | 5.087712                | 2.453830  | 1.488163  |
| 23            | 1             | 3.412016                | 2.911325  | 1.842117  |
| 24            | 1             | 4.079255                | 3.168098  | 0.225486  |
| 25            | 1             | 6.251570                | 0.654197  | 1.405399  |
| 26            | 1             | 6.357361                | -0.615317 | 0.176512  |
| 27            | 1             | 5.868048                | -1.024412 | 1.822485  |
| 28            | 6             | -0.661378               | -0.403077 | 3.482822  |
| 29            | 6             | -2.533403               | 1.837410  | 2.352367  |
| 30            | 6             | -4.323949               | 0.492957  | -0.040781 |
| 31            | 6             | -3.467055               | -2.462463 | -0.332358 |
| 32            | 6             | -1.150999               | -3.065035 | 1.914816  |
| 33            | 1             | -1.287670               | -0.687189 | 4.341889  |
| 34            | 1             | -0.304342               | 0.617456  | 3.647875  |
| 35            | 1             | 0.211158                | -1.062766 | 3.470658  |
| 36            | 1             | -2.828598               | 1.716141  | 3.403778  |
| 37            | 1             | -3.314115               | 2.424216  | 1.861770  |
| 38            | 1             | -1.607961               | 2.423500  | 2.338458  |
| 39            | 1             | -5.258566               | -0.002869 | 0.256944  |
| 40            | 1             | -4.210594               | 0.368957  | -1.123010 |
| 41            | 1             | -4.432350               | 1.559818  | 0.169134  |
| 42            | 1             | -4.512002               | -2.575752 | -0.011485 |
| 43            | 1             | -3.003235               | -3.451439 | -0.299580 |
| 44            | 1             | -3.473430               | -2.124299 | -1.374415 |
| 45            | 1             | -1.506400               | -3.320857 | 2.922973  |
| 46            | 1             | -0.056623               | -3.062144 | 1.945598  |
| 47            | 1             | -1.467795               | -3.870091 | 1.246992  |
| 48            | 6             | -0.518306               | 3.081286  | -0.969139 |
| 49            | 6             | -0.127243               | 4.318778  | -0.114957 |
| 50            | 6             | 0.040252                | 3.223758  | -2.405306 |
| 51            | 6             | -2.055004               | 3.037972  | -1.024409 |
| 52            | 1             | -0.398776               | 4.166533  | 0.935687  |



|    |   |           |           |           |
|----|---|-----------|-----------|-----------|
| 53 | 1 | 0.937821  | 4.564392  | -0.166089 |
| 54 | 1 | 1.134150  | 3.295174  | -2.396890 |
| 55 | 1 | -0.247254 | 2.357011  | -3.006115 |
| 56 | 1 | -2.407441 | 2.178421  | -1.592680 |
| 57 | 1 | -2.480555 | 3.009504  | -0.019492 |
| 58 | 6 | 1.131587  | -2.466002 | -1.312957 |
| 59 | 6 | -0.263013 | -3.062863 | -1.591233 |
| 60 | 6 | 1.774051  | -2.096766 | -2.672630 |
| 61 | 6 | 1.937857  | -3.589354 | -0.596963 |
| 62 | 1 | -0.724975 | -3.418334 | -0.669002 |
| 63 | 1 | -0.922746 | -2.345909 | -2.077068 |
| 64 | 1 | 1.138567  | -1.377081 | -3.197321 |
| 65 | 1 | 2.767696  | -1.654276 | -2.550875 |
| 66 | 1 | 3.018390  | -3.471089 | -0.676806 |
| 67 | 1 | 1.667094  | -3.653253 | 0.462262  |
| 68 | 1 | 1.685368  | -4.548391 | -1.062631 |
| 69 | 1 | 1.875760  | -2.993958 | -3.294847 |
| 70 | 1 | -0.149466 | -3.925114 | -2.258060 |
| 71 | 1 | -0.675214 | 5.191661  | -0.485979 |
| 72 | 1 | -2.418649 | 3.948405  | -1.514753 |
| 73 | 1 | -0.358332 | 4.130369  | -2.876258 |

**TSM19-20** (E = -1199.2660566 a.u.)

| Center Number | Atomic Number | Coordinates (Angstroms) |           |           |
|---------------|---------------|-------------------------|-----------|-----------|
|               |               | X                       | Y         | Z         |
| 1             | 22            | 1.341330                | -0.179089 | -0.633995 |
| 2             | 7             | 0.454886                | -0.755579 | 0.893712  |
| 3             | 6             | -0.188815               | 0.537262  | 1.114323  |
| 4             | 7             | -2.473195               | -0.626100 | -0.526082 |
| 5             | 6             | 3.127277                | 1.010622  | 0.286664  |
| 6             | 6             | 2.576103                | 1.845643  | -0.736638 |
| 7             | 6             | 3.680494                | -0.143354 | -0.339662 |
| 8             | 17            | 0.694198                | -1.427548 | -2.468713 |
| 9             | 6             | 2.826393                | 1.217644  | -1.994389 |
| 10            | 6             | 3.507081                | -0.001500 | -1.751926 |
| 11            | 6             | 0.335900                | -1.842471 | 1.909866  |
| 12            | 6             | -2.661477               | 0.266432  | 0.371244  |
| 13            | 6             | -3.510934               | -1.135527 | -1.461918 |
| 14            | 6             | -1.568905               | 0.815495  | 1.184417  |
| 15            | 1             | 0.384282                | 1.178484  | 1.786023  |
| 16            | 6             | -2.097237               | 1.933026  | 1.961571  |
| 17            | 1             | 0.247867                | 1.108608  | -0.176054 |
| 18            | 6             | -3.926026               | 1.041210  | 0.779032  |
| 19            | 6             | -3.432732               | 2.073521  | 1.756285  |
| 20            | 1             | -4.415553               | 1.498552  | -0.087816 |
| 21            | 1             | -4.668316               | 0.382000  | 1.242463  |
| 22            | 6             | -4.391521               | 3.048863  | 2.376542  |
| 23            | 6             | -1.245387               | 2.780424  | 2.874758  |
| 24            | 1             | -1.844117               | 3.521511  | 3.411068  |
| 25            | 1             | -0.474653               | 3.324607  | 2.312338  |
| 26            | 1             | -0.727676               | 2.164307  | 3.622122  |
| 27            | 1             | -3.906094               | 3.723121  | 3.088346  |
| 28            | 1             | -5.198213               | 2.522371  | 2.908537  |
| 29            | 1             | -4.876999               | 3.667596  | 1.607189  |
| 30            | 6             | 1.168779                | -3.028577 | 1.381825  |
| 31            | 6             | 0.892687                | -1.368299 | 3.273404  |
| 32            | 6             | -1.132321               | -2.293257 | 2.078698  |
| 33            | 1             | -1.550468               | -2.589565 | 1.114828  |
| 34            | 1             | -1.750098               | -1.488004 | 2.486127  |
| 35            | 1             | 0.328285                | -0.509248 | 3.653328  |
| 36            | 1             | 1.946664                | -1.083997 | 3.188222  |
| 37            | 1             | 2.221396                | -2.747572 | 1.270831  |
| 38            | 1             | 0.789157                | -3.356778 | 0.408688  |
| 39            | 6             | -3.614373               | -0.143746 | -2.647973 |
| 40            | 6             | -2.970641               | -2.489814 | -1.979970 |

|    |   |           |           |           |
|----|---|-----------|-----------|-----------|
| 41 | 6 | -4.911361 | -1.383137 | -0.842752 |
| 42 | 1 | -4.825794 | -1.931646 | 0.102937  |
| 43 | 1 | -5.467637 | -0.459608 | -0.664372 |
| 44 | 1 | -3.980375 | 0.834675  | -2.315413 |
| 45 | 1 | -2.631139 | -0.007393 | -3.109439 |
| 46 | 1 | -1.962970 | -2.361845 | -2.382134 |
| 47 | 1 | -2.921030 | -3.217250 | -1.160594 |
| 48 | 6 | 2.040124  | 3.243157  | -0.541117 |
| 49 | 6 | 3.278886  | 1.391906  | 1.738661  |
| 50 | 6 | 4.485136  | -1.227922 | 0.334920  |
| 51 | 6 | 4.035543  | -0.942334 | -2.802225 |
| 52 | 6 | 2.443157  | 1.759919  | -3.347788 |
| 53 | 1 | 2.855005  | 3.977604  | -0.617003 |
| 54 | 1 | 1.576401  | 3.367601  | 0.442438  |
| 55 | 1 | 1.290669  | 3.500142  | -1.295997 |
| 56 | 1 | 4.181719  | 2.004169  | 1.875517  |
| 57 | 1 | 3.375588  | 0.514025  | 2.382903  |
| 58 | 1 | 2.432144  | 1.981976  | 2.104115  |
| 59 | 1 | 5.558475  | -0.995712 | 0.278647  |
| 60 | 1 | 4.337525  | -2.203362 | -0.140240 |
| 61 | 1 | 4.226437  | -1.328161 | 1.393116  |
| 62 | 1 | 5.034787  | -0.621087 | -3.129669 |
| 63 | 1 | 3.384546  | -0.971587 | -3.679979 |
| 64 | 1 | 4.122730  | -1.965322 | -2.423940 |
| 65 | 1 | 3.274102  | 2.327830  | -3.789855 |
| 66 | 1 | 1.582130  | 2.433109  | -3.283328 |
| 67 | 1 | 2.183078  | 0.954134  | -4.041116 |
| 68 | 1 | 0.812945  | -2.175663 | 4.010403  |
| 69 | 1 | 1.111316  | -3.871038 | 2.080391  |
| 70 | 1 | -1.172488 | -3.142486 | 2.771467  |
| 71 | 1 | -3.625910 | -2.894071 | -2.761072 |
| 72 | 1 | -4.305951 | -0.529618 | -3.406539 |
| 73 | 1 | -5.504625 | -1.995290 | -1.532091 |

**M20** (E = -1199.3258323 a.u.)

| Center Number | Atomic Number | Coordinates (Angstroms) |           |           |
|---------------|---------------|-------------------------|-----------|-----------|
|               |               | X                       | Y         | Z         |
| 1             | 22            | 0.605295                | -0.419064 | -0.322981 |
| 2             | 7             | 0.528819                | -0.331454 | 1.529893  |
| 3             | 6             | -0.041755               | 1.039606  | 1.539741  |
| 4             | 7             | -1.382492               | -0.052472 | -0.695977 |
| 5             | 6             | 2.850225                | 0.514306  | -0.266122 |
| 6             | 6             | 2.053787                | 1.399598  | -1.055820 |
| 7             | 6             | 2.968468                | -0.704442 | -0.976812 |
| 8             | 17            | 0.459121                | -2.765581 | -0.548224 |
| 9             | 6             | 1.754149                | 0.747050  | -2.294322 |
| 10            | 6             | 2.299136                | -0.553536 | -2.238974 |
| 11            | 6             | 0.633050                | -1.097927 | 2.810159  |
| 12            | 6             | -2.108154               | 0.503579  | 0.348954  |
| 13            | 6             | -2.147511               | -0.399258 | -1.964977 |
| 14            | 6             | -1.520543               | 1.068550  | 1.452409  |
| 15            | 1             | 0.392481                | 1.650825  | 2.332916  |
| 16            | 6             | -2.522620               | 1.598057  | 2.378986  |
| 17            | 1             | 0.319554                | 1.524520  | 0.602566  |
| 18            | 6             | -3.615714               | 0.579843  | 0.587513  |
| 19            | 6             | -3.756829               | 1.336648  | 1.887369  |
| 20            | 1             | -4.182386               | 1.053048  | -0.217071 |
| 21            | 1             | -4.025436               | -0.428671 | 0.706633  |
| 22            | 6             | -5.108656               | 1.679152  | 2.450370  |
| 23            | 6             | -2.174468               | 2.336805  | 3.646581  |
| 24            | 1             | -3.063901               | 2.764118  | 4.119312  |
| 25            | 1             | -1.475602               | 3.160513  | 3.446723  |
| 26            | 1             | -1.694896               | 1.677633  | 4.382222  |
| 27            | 1             | -5.029032               | 2.227211  | 3.395050  |
| 28            | 1             | -5.706473               | 0.776091  | 2.643264  |

|    |   |           |           |           |
|----|---|-----------|-----------|-----------|
| 29 | 1 | -5.690730 | 2.301056  | 1.754084  |
| 30 | 6 | 1.738035  | -2.166600 | 2.665411  |
| 31 | 6 | 1.006269  | -0.177784 | 3.997685  |
| 32 | 6 | -0.721872 | -1.797060 | 3.090827  |
| 33 | 1 | -0.971302 | -2.471007 | 2.266232  |
| 34 | 1 | -1.528397 | -1.065037 | 3.196557  |
| 35 | 1 | 0.213807  | 0.538479  | 4.233332  |
| 36 | 1 | 1.931339  | 0.373503  | 3.793449  |
| 37 | 1 | 2.717349  | -1.696691 | 2.528670  |
| 38 | 1 | 1.540384  | -2.821091 | 1.815385  |
| 39 | 6 | -2.705935 | 0.890747  | -2.620222 |
| 40 | 6 | -1.205222 | -1.066812 | -2.988517 |
| 41 | 6 | -3.282206 | -1.428864 | -1.699454 |
| 42 | 1 | -2.924178 | -2.218378 | -1.030653 |
| 43 | 1 | -4.181812 | -0.982440 | -1.275307 |
| 44 | 1 | -3.363439 | 1.451972  | -1.953338 |
| 45 | 1 | -1.884131 | 1.551261  | -2.914973 |
| 46 | 1 | -0.325771 | -0.455755 | -3.177328 |
| 47 | 1 | -0.882251 | -2.051701 | -2.649463 |
| 48 | 6 | 1.852772  | 2.877856  | -0.810298 |
| 49 | 6 | 3.567861  | 0.893998  | 1.004823  |
| 50 | 6 | 3.802540  | -1.901586 | -0.601288 |
| 51 | 6 | 2.318066  | -1.595647 | -3.325791 |
| 52 | 6 | 1.192555  | 1.469809  | -3.495216 |
| 53 | 1 | 2.590046  | 3.457252  | -1.385633 |
| 54 | 1 | 1.985919  | 3.141855  | 0.243437  |
| 55 | 1 | 0.858885  | 3.218795  | -1.122026 |
| 56 | 1 | 4.477832  | 1.464535  | 0.769611  |
| 57 | 1 | 3.869477  | 0.013467  | 1.577463  |
| 58 | 1 | 2.949927  | 1.517256  | 1.658880  |
| 59 | 1 | 4.724330  | -1.926481 | -1.200566 |
| 60 | 1 | 3.260270  | -2.835479 | -0.780350 |
| 61 | 1 | 4.093511  | -1.881068 | 0.452640  |
| 62 | 1 | 3.348602  | -1.781525 | -3.658885 |
| 63 | 1 | 1.738081  | -1.286632 | -4.200142 |
| 64 | 1 | 1.909697  | -2.547706 | -2.967016 |
| 65 | 1 | 1.912044  | 2.226932  | -3.838837 |
| 66 | 1 | 0.256724  | 1.993035  | -3.271717 |
| 67 | 1 | 1.007936  | 0.794851  | -4.335322 |
| 68 | 1 | 1.168981  | -0.793210 | 4.889050  |
| 69 | 1 | 1.776216  | -2.775046 | 3.576407  |
| 70 | 1 | -0.657599 | -2.381264 | 4.017329  |
| 71 | 1 | -1.740715 | -1.184832 | -3.937527 |
| 72 | 1 | -3.277130 | 0.633039  | -3.520235 |
| 73 | 1 | -3.569280 | -1.894425 | -2.649334 |

**TSM20-21** (E = -1199.3008203 a.u.)

| Center Number | Atomic Number | Coordinates (Angstroms) |           |           |
|---------------|---------------|-------------------------|-----------|-----------|
|               |               | X                       | Y         | Z         |
| 1             | 22            | 0.383353                | -0.202641 | -0.108014 |
| 2             | 7             | 0.407286                | -0.337662 | 1.626035  |
| 3             | 6             | -0.361095               | 1.584527  | 1.553017  |
| 4             | 7             | -1.771197               | 0.330612  | -0.553765 |
| 5             | 6             | 2.689288                | 0.522083  | -0.155218 |
| 6             | 6             | 1.960130                | 1.527548  | -0.854076 |
| 7             | 6             | 2.639556                | -0.661558 | -0.932203 |
| 8             | 17            | 0.012853                | -2.537991 | -0.494942 |
| 9             | 6             | 1.531955                | 0.982337  | -2.108581 |
| 10            | 6             | 1.943332                | -0.365111 | -2.155108 |
| 11            | 6             | 0.479308                | -0.952777 | 2.958834  |
| 12            | 6             | -2.413037               | 0.994363  | 0.398026  |
| 13            | 6             | -2.564120               | -0.196611 | -1.747883 |
| 14            | 6             | -1.746262               | 1.545868  | 1.527438  |
| 15            | 1             | 0.187260                | 1.980297  | 2.395066  |
| 16            | 6             | -2.725912               | 1.924127  | 2.549121  |

|    |   |           |           |           |
|----|---|-----------|-----------|-----------|
| 17 | 1 | 0.113058  | 1.839962  | 0.603387  |
| 18 | 6 | -3.904702 | 1.232591  | 0.639130  |
| 19 | 6 | -3.973409 | 1.749713  | 2.058982  |
| 20 | 1 | -4.290994 | 1.995883  | -0.044210 |
| 21 | 1 | -4.513044 | 0.339182  | 0.487625  |
| 22 | 6 | -5.300022 | 2.063349  | 2.691550  |
| 23 | 6 | -2.328866 | 2.493449  | 3.885445  |
| 24 | 1 | -3.200024 | 2.803856  | 4.469249  |
| 25 | 1 | -1.678695 | 3.370187  | 3.758740  |
| 26 | 1 | -1.771131 | 1.761876  | 4.484134  |
| 27 | 1 | -5.188235 | 2.462364  | 3.704467  |
| 28 | 1 | -5.931809 | 1.165594  | 2.755742  |
| 29 | 1 | -5.860336 | 2.802845  | 2.100311  |
| 30 | 6 | 1.407362  | -2.191477 | 2.855048  |
| 31 | 6 | 1.053678  | 0.008658  | 4.028860  |
| 32 | 6 | -0.941536 | -1.419504 | 3.368847  |
| 33 | 1 | -1.323556 | -2.135141 | 2.634719  |
| 34 | 1 | -1.634165 | -0.574228 | 3.418822  |
| 35 | 1 | 0.381244  | 0.850413  | 4.220780  |
| 36 | 1 | 2.027618  | 0.399734  | 3.717989  |
| 37 | 1 | 2.433901  | -1.888315 | 2.625202  |
| 38 | 1 | 1.058264  | -2.864502 | 2.068959  |
| 39 | 6 | -3.533562 | 0.858366  | -2.347759 |
| 40 | 6 | -1.584186 | -0.570555 | -2.876345 |
| 41 | 6 | -3.329113 | -1.476913 | -1.328373 |
| 42 | 1 | -2.625656 | -2.236583 | -0.979765 |
| 43 | 1 | -4.054220 | -1.285014 | -0.533294 |
| 44 | 1 | -4.467652 | 0.954394  | -1.793044 |
| 45 | 1 | -3.052348 | 1.841904  | -2.404854 |
| 46 | 1 | -1.094049 | 0.319529  | -3.272694 |
| 47 | 1 | -0.834555 | -1.283504 | -2.536957 |
| 48 | 6 | 1.931990  | 3.001442  | -0.517235 |
| 49 | 6 | 3.511404  | 0.746538  | 1.088236  |
| 50 | 6 | 3.379384  | -1.947336 | -0.664826 |
| 51 | 6 | 1.822252  | -1.332110 | -3.302663 |
| 52 | 6 | 0.953703  | 1.820841  | -3.223078 |
| 53 | 1 | 2.734066  | 3.525985  | -1.057321 |
| 54 | 1 | 2.090269  | 3.183494  | 0.550526  |
| 55 | 1 | 0.987012  | 3.477545  | -0.804842 |
| 56 | 1 | 4.501848  | 1.142918  | 0.820911  |
| 57 | 1 | 3.666124  | -0.181120 | 1.645191  |
| 58 | 1 | 3.041012  | 1.465410  | 1.766173  |
| 59 | 1 | 4.307392  | -1.983932 | -1.254623 |
| 60 | 1 | 2.772794  | -2.817556 | -0.931959 |
| 61 | 1 | 3.652909  | -2.045612 | 0.389817  |
| 62 | 1 | 2.816321  | -1.574370 | -3.704066 |
| 63 | 1 | 1.223659  | -0.923069 | -4.121713 |
| 64 | 1 | 1.360239  | -2.272737 | -2.979768 |
| 65 | 1 | 1.676004  | 2.593650  | -3.522433 |
| 66 | 1 | 0.032539  | 2.338602  | -2.929318 |
| 67 | 1 | 0.733912  | 1.221141  | -4.110394 |
| 68 | 1 | 1.187091  | -0.531321 | 4.973433  |
| 69 | 1 | 1.411857  | -2.728092 | 3.811702  |
| 70 | 1 | -0.910617 | -1.904646 | 4.352427  |
| 71 | 1 | -2.145634 | -1.038752 | -3.692959 |
| 72 | 1 | -3.796653 | 0.555005  | -3.366959 |
| 73 | 1 | -3.875121 | -1.873970 | -2.192638 |

**M21** (E = -1199.3179596 a.u.)

| Center Number | Atomic Number | Coordinates (Angstroms) |   |   |
|---------------|---------------|-------------------------|---|---|
|               |               | X                       | Y | Z |

|    |    |           |           |           |
|----|----|-----------|-----------|-----------|
| 1  | 22 | 1.003076  | -0.080074 | -0.239777 |
| 2  | 7  | 0.209958  | -1.493708 | -0.687211 |
| 3  | 6  | -1.503424 | -0.757126 | 2.066858  |
| 4  | 7  | -1.074873 | 1.436162  | 0.035400  |
| 5  | 6  | 2.894227  | -1.160479 | 0.734446  |
| 6  | 6  | 2.109392  | -0.657360 | 1.813783  |
| 7  | 6  | 3.474796  | -0.051726 | 0.065153  |
| 8  | 17 | 1.580382  | 0.670945  | -2.428202 |
| 9  | 6  | 2.224856  | 0.770407  | 1.813641  |
| 10 | 6  | 3.067961  | 1.140857  | 0.734434  |
| 11 | 6  | -0.312854 | -2.706370 | -1.302039 |
| 12 | 6  | -2.210238 | 0.921327  | 0.349741  |
| 13 | 6  | -1.019045 | 2.822006  | -0.613586 |
| 14 | 6  | -2.390047 | -0.306884 | 1.173194  |
| 15 | 1  | -1.693981 | -1.630274 | 2.678097  |
| 16 | 6  | -3.752649 | -0.807772 | 0.940823  |
| 17 | 1  | -0.563058 | -0.249500 | 2.211815  |
| 18 | 6  | -3.629958 | 1.328357  | -0.057586 |
| 19 | 6  | -4.455175 | 0.094510  | 0.227010  |
| 20 | 1  | -3.992723 | 2.156283  | 0.560740  |
| 21 | 1  | -3.695752 | 1.653102  | -1.096593 |
| 22 | 6  | -5.885883 | 0.037297  | -0.222868 |
| 23 | 6  | -4.228662 | -2.114610 | 1.513194  |
| 24 | 1  | -5.255108 | -2.341877 | 1.213585  |
| 25 | 1  | -4.195836 | -2.094121 | 2.611148  |
| 26 | 1  | -3.588245 | -2.943356 | 1.186820  |
| 27 | 1  | -6.373549 | -0.900231 | 0.057477  |
| 28 | 1  | -5.952907 | 0.141309  | -1.314953 |
| 29 | 1  | -6.465968 | 0.864866  | 0.209904  |
| 30 | 6  | 0.716173  | -3.242618 | -2.329601 |
| 31 | 6  | -0.593875 | -3.781660 | -0.223997 |
| 32 | 6  | -1.627561 | -2.347606 | -2.043124 |
| 33 | 1  | -1.428610 | -1.584010 | -2.802052 |
| 34 | 1  | -2.371294 | -1.955562 | -1.341754 |
| 35 | 1  | -1.301611 | -3.399896 | 0.518780  |
| 36 | 1  | 0.330420  | -4.060575 | 0.292858  |
| 37 | 1  | 1.647146  | -3.527172 | -1.829906 |
| 38 | 1  | 0.943208  | -2.470017 | -3.070149 |
| 39 | 6  | -1.973833 | 3.840472  | 0.065834  |
| 40 | 6  | 0.411169  | 3.349069  | -0.393855 |
| 41 | 6  | -1.307421 | 2.729654  | -2.130000 |
| 42 | 1  | -0.611205 | 2.041943  | -2.613711 |
| 43 | 1  | -2.329237 | 2.398744  | -2.335998 |
| 44 | 1  | -3.007513 | 3.760028  | -0.273283 |
| 45 | 1  | -1.947093 | 3.738359  | 1.157083  |
| 46 | 1  | 0.623592  | 3.440011  | 0.675607  |
| 47 | 1  | 1.150653  | 2.696778  | -0.857647 |
| 48 | 6  | 1.582734  | -1.513765 | 2.943601  |
| 49 | 6  | 3.246638  | -2.610551 | 0.519028  |
| 50 | 6  | 4.492963  | -0.116609 | -1.043468 |
| 51 | 6  | 3.598084  | 2.512892  | 0.400348  |
| 52 | 6  | 1.680566  | 1.686396  | 2.885672  |
| 53 | 1  | 2.423476  | -1.935827 | 3.513603  |
| 54 | 1  | 0.976989  | -2.352218 | 2.583885  |
| 55 | 1  | 0.975967  | -0.936886 | 3.648334  |
| 56 | 1  | 4.105049  | -2.891915 | 1.147750  |
| 57 | 1  | 3.520968  | -2.811577 | -0.520791 |
| 58 | 1  | 2.414860  | -3.271156 | 0.779002  |
| 59 | 1  | 5.510123  | -0.097778 | -0.623782 |
| 60 | 1  | 4.393227  | 0.727260  | -1.731262 |
| 61 | 1  | 4.391907  | -1.032168 | -1.633786 |
| 62 | 1  | 4.665219  | 2.581313  | 0.655869  |
| 63 | 1  | 3.079064  | 3.301339  | 0.952603  |
| 64 | 1  | 3.507374  | 2.734234  | -0.669698 |

|    |   |           |           |           |
|----|---|-----------|-----------|-----------|
| 65 | 1 | 2.278096  | 1.599426  | 3.804633  |
| 66 | 1 | 0.642838  | 1.454971  | 3.152213  |
| 67 | 1 | 1.712873  | 2.734810  | 2.575398  |
| 68 | 1 | -1.017960 | -4.684283 | -0.681645 |
| 69 | 1 | 0.315619  | -4.124268 | -2.845907 |
| 70 | 1 | -2.044676 | -3.234691 | -2.536545 |
| 71 | 1 | 0.510338  | 4.340464  | -0.849494 |
| 72 | 1 | -1.634814 | 4.851524  | -0.182743 |
| 73 | 1 | -1.181220 | 3.722344  | -2.578117 |

**M15** (E = -675.8581344 a.u.)

| Center Number | Atomic Number | Coordinates (Angstroms) |           |           |
|---------------|---------------|-------------------------|-----------|-----------|
|               |               | X                       | Y         | Z         |
| 1             | 22            | -0.554670               | -0.165500 | -0.476379 |
| 2             | 7             | -0.928568               | 1.471232  | -0.303342 |
| 3             | 6             | -2.020948               | -1.137328 | 1.061152  |
| 4             | 6             | -0.752852               | -0.998552 | 1.698523  |
| 5             | 6             | -1.877692               | -2.099094 | 0.012451  |
| 6             | 17            | 0.361515                | -0.583409 | -2.581625 |
| 7             | 6             | 0.163567                | -1.886223 | 1.047074  |
| 8             | 6             | -0.535188               | -2.580347 | 0.020732  |
| 9             | 6             | -1.292278               | 2.874421  | -0.175032 |
| 10            | 6             | -2.670487               | 3.091851  | -0.849255 |
| 11            | 6             | -1.364580               | 3.272713  | 1.318790  |
| 12            | 6             | -0.215168               | 3.724739  | -0.895131 |
| 13            | 1             | -0.146700               | 3.435605  | -1.948590 |
| 14            | 1             | 0.765218                | 3.570927  | -0.430865 |
| 15            | 1             | -0.401025               | 3.095302  | 1.808767  |
| 16            | 1             | -2.132017               | 2.688045  | 1.837353  |
| 17            | 1             | -3.438522               | 2.486971  | -0.354503 |
| 18            | 1             | -2.625366               | 2.803696  | -1.904778 |
| 19            | 6             | -0.469994               | -0.204367 | 2.951381  |
| 20            | 6             | -3.318511               | -0.513725 | 1.515038  |
| 21            | 6             | -2.976432               | -2.590490 | -0.899490 |
| 22            | 6             | 0.017038                | -3.659183 | -0.873906 |
| 23            | 6             | 1.609134                | -2.094335 | 1.434062  |
| 24            | 1             | -0.619294               | -0.830291 | 3.842724  |
| 25            | 1             | -1.131827               | 0.661272  | 3.036753  |
| 26            | 1             | 0.560801                | 0.164254  | 2.980051  |
| 27            | 1             | -3.829919               | -1.172869 | 2.230938  |
| 28            | 1             | -4.004029               | -0.342577 | 0.678761  |
| 29            | 1             | -3.152022               | 0.447973  | 2.007953  |
| 30            | 1             | -3.457802               | -3.482204 | -0.473426 |
| 31            | 1             | -2.590071               | -2.865857 | -1.886164 |
| 32            | 1             | -3.757349               | -1.836268 | -1.041760 |
| 33            | 1             | -0.296899               | -4.651449 | -0.520792 |
| 34            | 1             | 1.110552                | -3.644285 | -0.893459 |
| 35            | 1             | -0.327892               | -3.545000 | -1.906433 |
| 36            | 1             | 1.696552                | -2.903130 | 2.173042  |
| 37            | 1             | 2.043450                | -1.196242 | 1.886127  |
| 38            | 1             | 2.226956                | -2.369218 | 0.573043  |
| 39            | 1             | -1.614771               | 4.335664  | 1.420697  |
| 40            | 1             | -2.965841               | 4.146286  | -0.787358 |
| 41            | 1             | -0.465123               | 4.791165  | -0.836545 |

**M16** (E = -523.4592199 a.u.)

| Center Number | Atomic Number | Coordinates (Angstroms) |           |           |
|---------------|---------------|-------------------------|-----------|-----------|
|               |               | X                       | Y         | Z         |
| 1             | 7             | 2.075137                | -1.274408 | -0.526310 |
| 2             | 6             | 1.564146                | -0.157600 | -0.843236 |
| 3             | 6             | 3.157126                | -1.484522 | 0.474456  |
| 4             | 6             | 0.511370                | -0.054930 | -1.910305 |
| 5             | 6             | 0.234186                | 1.372844  | -2.118885 |
| 6             | 6             | 1.825767                | 1.274815  | -0.363914 |
| 7             | 6             | 0.969485                | 2.126109  | -1.272684 |
| 8             | 1             | 1.531395                | 1.405044  | 0.683234  |

|    |   |           |           |           |
|----|---|-----------|-----------|-----------|
| 9  | 1 | 2.886292  | 1.543588  | -0.424355 |
| 10 | 6 | 1.004389  | 3.621857  | -1.138613 |
| 11 | 6 | -0.752521 | 1.841691  | -3.154084 |
| 12 | 1 | -0.831348 | 2.931646  | -3.186262 |
| 13 | 1 | -1.752424 | 1.435890  | -2.949823 |
| 14 | 1 | -0.462482 | 1.492731  | -4.154084 |
| 15 | 1 | 0.336959  | 4.122813  | -1.845238 |
| 16 | 1 | 2.022130  | 4.002966  | -1.304910 |
| 17 | 1 | 0.714958  | 3.928225  | -0.123094 |
| 18 | 6 | 2.968388  | -0.709436 | 1.801209  |
| 19 | 6 | 3.136866  | -2.999561 | 0.782819  |
| 20 | 6 | 4.508371  | -1.116798 | -0.185449 |
| 21 | 1 | 4.643634  | -1.679524 | -1.115137 |
| 22 | 1 | 4.561147  | -0.047828 | -0.419182 |
| 23 | 1 | 3.171567  | 0.359404  | 1.696371  |
| 24 | 1 | 1.948694  | -0.837848 | 2.182837  |
| 25 | 1 | 2.184229  | -3.281287 | 1.245664  |
| 26 | 1 | 3.247255  | -3.573729 | -0.142405 |
| 27 | 1 | 3.950242  | -3.268694 | 1.466651  |
| 28 | 1 | 3.661139  | -1.103215 | 2.553685  |
| 29 | 1 | 5.336283  | -1.360567 | 0.490341  |
| 30 | 6 | -0.051229 | -1.097721 | -2.538078 |
| 31 | 1 | -0.805698 | -0.964907 | -3.304353 |
| 32 | 1 | 0.245155  | -2.108474 | -2.285797 |

**M22** (E = -924.1524042 a.u.)

| Center Number | Atomic Number | Coordinates (Angstroms) |           |           |
|---------------|---------------|-------------------------|-----------|-----------|
|               |               | X                       | Y         | Z         |
| 1             | 22            | -0.297764               | -0.073262 | -0.371971 |
| 2             | 7             | -0.824365               | 1.527225  | -0.222760 |
| 3             | 6             | -1.893915               | -1.062652 | 1.064522  |
| 4             | 6             | -0.648237               | -1.048388 | 1.758292  |
| 5             | 6             | -1.771845               | -1.972919 | -0.023338 |
| 6             | 17            | -0.216779               | -0.525687 | -2.696343 |
| 7             | 6             | 0.218494                | -1.998456 | 1.126474  |
| 8             | 6             | -0.472112               | -2.563364 | 0.026704  |
| 9             | 6             | -1.351062               | 2.882770  | -0.200123 |
| 10            | 6             | -2.761548               | 2.893205  | -0.841747 |
| 11            | 6             | -1.431488               | 3.404010  | 1.256617  |
| 12            | 6             | -0.400949               | 3.788288  | -1.026733 |
| 13            | 1             | -0.326626               | 3.415078  | -2.052983 |
| 14            | 1             | 0.603251                | 3.790712  | -0.587754 |
| 15            | 1             | -0.439195               | 3.393959  | 1.722671  |
| 16            | 1             | -2.100195               | 2.775264  | 1.854147  |
| 17            | 1             | -3.446808               | 2.258623  | -0.269812 |
| 18            | 1             | -2.710076               | 2.512046  | -1.866722 |
| 19            | 6             | -0.371370               | -0.332980 | 3.059952  |
| 20            | 6             | -3.161792               | -0.372646 | 1.503142  |
| 21            | 6             | -2.859873               | -2.356727 | -0.995440 |
| 22            | 6             | 0.024003                | -3.633358 | -0.912206 |
| 23            | 6             | 1.580422                | -2.407045 | 1.631679  |
| 24            | 1             | -0.663677               | -0.955358 | 3.918472  |
| 25            | 1             | -0.927857               | 0.607020  | 3.128236  |
| 26            | 1             | 0.692642                | -0.099214 | 3.179641  |
| 27            | 1             | -3.733474               | -1.019325 | 2.185013  |
| 28            | 1             | -3.809575               | -0.134685 | 0.653764  |
| 29            | 1             | -2.950987               | 0.562332  | 2.029807  |
| 30            | 1             | -3.383562               | -3.260488 | -0.650357 |
| 31            | 1             | -2.451485               | -2.563320 | -1.989248 |
| 32            | 1             | -3.606583               | -1.563519 | -1.102941 |
| 33            | 1             | -0.505674               | -4.581149 | -0.741349 |
| 34            | 1             | 1.093110                | -3.826953 | -0.775258 |
| 35            | 1             | -0.133633               | -3.347062 | -1.958523 |
| 36            | 1             | 1.487581                | -3.199270 | 2.388127  |
| 37            | 1             | 2.111751                | -1.571959 | 2.100635  |

|    |   |           |           |           |
|----|---|-----------|-----------|-----------|
| 38 | 1 | 2.215783  | -2.795939 | 0.829153  |
| 39 | 1 | -1.812084 | 4.432853  | 1.280585  |
| 40 | 1 | -3.168652 | 3.912040  | -0.864920 |
| 41 | 1 | -0.772851 | 4.820470  | -1.050523 |
| 42 | 7 | 1.868589  | 0.311090  | -0.132583 |
| 43 | 6 | 2.774825  | -0.285525 | -0.941753 |
| 44 | 6 | 2.317333  | 1.188931  | 0.794965  |
| 45 | 6 | 4.144232  | -0.032369 | -0.848166 |
| 46 | 1 | 2.373709  | -0.960605 | -1.687836 |
| 47 | 6 | 3.670543  | 1.486671  | 0.954496  |
| 48 | 1 | 1.557943  | 1.664800  | 1.402168  |
| 49 | 6 | 4.604906  | 0.866516  | 0.118213  |
| 50 | 1 | 4.828349  | -0.529961 | -1.524913 |
| 51 | 1 | 3.978813  | 2.197042  | 1.712265  |
| 52 | 1 | 5.663136  | 1.083031  | 0.213754  |

**tBuNC** (E = -250.6576605 a.u.)

| Center Number | Atomic Number | Coordinates (Angstroms) |           |           |
|---------------|---------------|-------------------------|-----------|-----------|
|               |               | X                       | Y         | Z         |
| 1             | 6             | 0.759878                | 1.394223  | -0.463256 |
| 2             | 6             | 0.285381                | -0.000045 | -0.000046 |
| 3             | 1             | 0.397322                | 1.611376  | -1.472537 |
| 4             | 1             | 0.396566                | 2.172243  | 0.214967  |
| 5             | 1             | 1.854255                | 1.421516  | -0.471796 |
| 6             | 6             | 0.759950                | -0.295622 | 1.439076  |
| 7             | 6             | 0.759572                | -1.098393 | -0.976076 |
| 8             | 1             | 0.398318                | -1.272684 | 1.773482  |
| 9             | 1             | 1.854306                | -0.299632 | 1.467642  |
| 10            | 1             | 0.395560                | 0.469089  | 2.131669  |
| 11            | 1             | 1.853925                | -1.119738 | -0.996122 |
| 12            | 1             | 0.397000                | -2.080998 | -0.659419 |
| 13            | 1             | 0.395743                | -0.899989 | -1.988761 |
| 14            | 7             | -1.175731               | -0.000054 | 0.000231  |
| 15            | 6             | -2.344783               | -0.000389 | 0.000578  |

**pyridine** (E = -248.2540483 a.u.)

| Center Number | Atomic Number | Coordinates (Angstroms) |           |           |
|---------------|---------------|-------------------------|-----------|-----------|
|               |               | X                       | Y         | Z         |
| 1             | 6             | -0.845126               | -0.064010 | 0.000229  |
| 2             | 6             | 0.554105                | -0.065633 | 0.000123  |
| 3             | 6             | 1.224743                | 1.161383  | -0.000068 |
| 4             | 6             | 0.466485                | 2.336263  | -0.000206 |
| 5             | 6             | -0.928907               | 2.232679  | -0.000131 |
| 6             | 7             | -1.591345               | 1.058636  | 0.000117  |
| 7             | 1             | 2.309100                | 1.200923  | -0.000148 |
| 8             | 1             | -1.397143               | -0.999164 | 0.000384  |
| 9             | 1             | 1.098109                | -1.003510 | 0.000220  |
| 10            | 1             | 0.940673                | 3.311304  | -0.000360 |
| 11            | 1             | -1.547605               | 3.125115  | -0.000183 |

In Benzene

By B3LYP/BS1

**M1a** (E = -697.9418212 a.u.)

| Center Number | Atomic Number | Coordinates (Angstroms) |           |           |
|---------------|---------------|-------------------------|-----------|-----------|
|               |               | X                       | Y         | Z         |
| 1             | 22            | -0.297474               | 0.029992  | 0.005020  |
| 2             | 6             | 1.804546                | 0.883626  | -0.695800 |
| 3             | 6             | 1.732578                | -0.462048 | -1.154845 |
| 4             | 6             | 1.806451                | 0.865623  | 0.731345  |
| 5             | 17            | -1.107365               | 2.229029  | 0.103364  |
| 6             | 6             | 1.686623                | -1.308604 | -0.008899 |
| 7             | 6             | 1.731883                | -0.490613 | 1.157157  |
| 8             | 6             | -1.243107               | -1.200293 | -1.482429 |
| 9             | 6             | -2.394177               | -0.717758 | -0.745598 |
| 10            | 1             | -0.857380               | -2.189361 | -1.236305 |
| 11            | 6             | -1.258211               | -1.353993 | 1.341180  |



|    |   |           |           |           |
|----|---|-----------|-----------|-----------|
| 12 | 6 | -2.400701 | -0.792225 | 0.649016  |
| 13 | 1 | -0.870079 | -2.310554 | 0.992605  |
| 14 | 1 | -1.256935 | -1.274142 | 2.423397  |
| 15 | 6 | -3.493963 | -0.114529 | 1.453846  |
| 16 | 6 | -3.481048 | 0.042372  | -1.483091 |
| 17 | 1 | -3.638229 | 1.045649  | -1.074071 |
| 18 | 1 | -4.434085 | -0.499739 | -1.412196 |
| 19 | 1 | -3.231315 | 0.141718  | -2.543396 |
| 20 | 1 | -3.678982 | 0.912951  | 1.125286  |
| 21 | 1 | -3.233711 | -0.091412 | 2.516075  |
| 22 | 1 | -4.435475 | -0.672085 | 1.351932  |
| 23 | 6 | 1.857070  | -0.918042 | -2.586963 |
| 24 | 6 | 1.974905  | 2.107465  | -1.559956 |
| 25 | 6 | 1.988926  | 2.065399  | 1.625900  |
| 26 | 6 | 1.841612  | -0.977129 | 2.580704  |
| 27 | 6 | 1.736746  | -2.815638 | -0.030671 |
| 28 | 1 | 2.914757  | -1.052363 | -2.855325 |
| 29 | 1 | 1.430881  | -0.189342 | -3.283539 |
| 30 | 1 | 1.351547  | -1.874048 | -2.755391 |
| 31 | 1 | 3.041966  | 2.338439  | -1.689503 |
| 32 | 1 | 1.491645  | 2.981883  | -1.115618 |
| 33 | 1 | 1.546073  | 1.962903  | -2.556832 |
| 34 | 1 | 3.058806  | 2.277783  | 1.764037  |
| 35 | 1 | 1.554610  | 1.902483  | 2.617483  |
| 36 | 1 | 1.518826  | 2.956784  | 1.202176  |
| 37 | 1 | 2.896610  | -1.101780 | 2.863748  |
| 38 | 1 | 1.347118  | -1.943439 | 2.719564  |
| 39 | 1 | 1.393532  | -0.270323 | 3.286286  |
| 40 | 1 | 2.779738  | -3.158197 | -0.087882 |
| 41 | 1 | 1.212280  | -3.234409 | -0.895984 |
| 42 | 1 | 1.300937  | -3.254480 | 0.872333  |
| 43 | 1 | -1.230532 | -1.003614 | -2.549561 |

**TSM1a-1b** (E = -697.9131394 a.u.)

| Center Number | Atomic Number | Coordinates (Angstroms) |           |           |
|---------------|---------------|-------------------------|-----------|-----------|
|               |               | X                       | Y         | Z         |
| 1             | 22            | -0.442954               | -0.971817 | -0.099940 |
| 2             | 6             | -2.582747               | -1.920721 | -0.513068 |
| 3             | 6             | -2.119791               | -2.405359 | 0.743082  |
| 4             | 6             | -1.706693               | -2.417448 | -1.522669 |
| 5             | 17            | -1.294336               | 1.147936  | 0.083838  |
| 6             | 6             | -0.965913               | -3.211662 | 0.510818  |
| 7             | 6             | -0.712063               | -3.217476 | -0.892338 |
| 8             | 6             | 1.051062                | -1.125092 | 1.365271  |
| 9             | 6             | 2.388215                | -1.070035 | 0.649758  |
| 10            | 1             | 1.022866                | -1.926374 | 2.106559  |
| 11            | 6             | 1.136156                | -0.861190 | -1.481111 |
| 12            | 6             | 2.428144                | -0.943439 | -0.691349 |
| 13            | 1             | 1.147811                | -1.536403 | -2.340455 |
| 14            | 1             | 1.001009                | 0.156427  | -1.887623 |
| 15            | 6             | 3.688339                | -0.833473 | -1.529020 |
| 16            | 6             | 3.597041                | -1.126716 | 1.564939  |
| 17            | 1             | 4.551859                | -1.086336 | 1.033427  |
| 18            | 1             | 3.580919                | -2.049927 | 2.161600  |
| 19            | 1             | 3.572095                | -0.290717 | 2.278846  |
| 20            | 1             | 3.696051                | 0.118796  | -2.078869 |
| 21            | 1             | 3.715468                | -1.632178 | -2.284086 |
| 22            | 1             | 4.610840                | -0.891517 | -0.944668 |
| 23            | 6             | -2.766885               | -2.154693 | 2.082836  |
| 24            | 6             | -3.833899               | -1.112981 | -0.749649 |
| 25            | 6             | -1.853858               | -2.169263 | -3.002836 |
| 26            | 6             | 0.341554                | -4.054992 | -1.568602 |
| 27            | 6             | -0.277079               | -4.095774 | 1.516767  |
| 28            | 1             | -3.507071               | -2.936490 | 2.303907  |
| 29            | 1             | -3.286613               | -1.192109 | 2.107983  |

|    |   |           |           |           |
|----|---|-----------|-----------|-----------|
| 30 | 1 | -2.032645 | -2.159818 | 2.894935  |
| 31 | 1 | -4.686373 | -1.783920 | -0.926594 |
| 32 | 1 | -3.738777 | -0.459678 | -1.621955 |
| 33 | 1 | -4.077711 | -0.480521 | 0.108158  |
| 34 | 1 | -2.566239 | -2.881959 | -3.441478 |
| 35 | 1 | -0.903278 | -2.285094 | -3.531122 |
| 36 | 1 | -2.230871 | -1.162263 | -3.210423 |
| 37 | 1 | 0.057154  | -5.116029 | -1.536967 |
| 38 | 1 | 1.315501  | -3.957748 | -1.077084 |
| 39 | 1 | 0.466687  | -3.780349 | -2.619304 |
| 40 | 1 | -0.712262 | -5.104971 | 1.487488  |
| 41 | 1 | -0.390060 | -3.719667 | 2.537912  |
| 42 | 1 | 0.793421  | -4.191389 | 1.309386  |
| 43 | 1 | 0.878950  | -0.184016 | 1.917634  |

**M1b** (E = -697.9327466 a.u.)

| Center Number | Atomic Number | Coordinates (Angstroms) |           |           |
|---------------|---------------|-------------------------|-----------|-----------|
|               |               | X                       | Y         | Z         |
| 1             | 22            | 0.064924                | 0.672100  | -0.000123 |
| 2             | 6             | 1.847347                | -0.760882 | 0.710107  |
| 3             | 6             | 1.847873                | -0.760878 | -0.708942 |
| 4             | 6             | 0.611856                | -1.321777 | 1.155696  |
| 5             | 17            | 1.619016                | 2.450660  | -0.000514 |
| 6             | 6             | 0.612719                | -1.321756 | -1.155459 |
| 7             | 6             | -0.135467               | -1.702398 | -0.000174 |
| 8             | 6             | -1.207185               | 1.606869  | -1.459011 |
| 9             | 6             | -2.198012               | 0.885140  | -0.704985 |
| 10            | 1             | -1.233998               | 1.518639  | -2.538437 |
| 11            | 6             | -1.207215               | 1.607923  | 1.458163  |
| 12            | 6             | -2.197972               | 0.885573  | 0.704694  |
| 13            | 1             | -1.233887               | 1.520449  | 2.537648  |
| 14            | 1             | -0.925296               | 2.604988  | 1.120393  |
| 15            | 6             | -3.182519               | 0.049599  | 1.507241  |
| 16            | 6             | -3.182849               | 0.049056  | -1.507022 |
| 17            | 1             | -3.539778               | -0.845875 | -0.995136 |
| 18            | 1             | -2.742724               | -0.252370 | -2.462922 |
| 19            | 1             | -4.061949               | 0.666910  | -1.738689 |
| 20            | 1             | -4.063022               | 0.666380  | 1.736416  |
| 21            | 1             | -2.743083               | -0.249033 | 2.464322  |
| 22            | 1             | -3.537182               | -0.847082 | 0.996830  |
| 23            | 6             | 2.966625                | -0.299377 | -1.605603 |
| 24            | 6             | 2.965452                | -0.299172 | 1.607473  |
| 25            | 6             | 0.263760                | -1.640908 | 2.589443  |
| 26            | 6             | -1.340388               | -2.607710 | -0.000737 |
| 27            | 6             | 0.265778                | -1.640800 | -2.589500 |
| 28            | 1             | 3.601581                | -1.150968 | -1.888727 |
| 29            | 1             | 3.595753                | 0.445313  | -1.112690 |
| 30            | 1             | 2.585582                | 0.150379  | -2.528247 |
| 31            | 1             | 3.602550                | -1.150003 | 1.888054  |
| 32            | 1             | 2.583733                | 0.147210  | 2.531466  |
| 33            | 1             | 3.592586                | 0.448334  | 1.116262  |
| 34            | 1             | 0.723329                | -2.592621 | 2.892981  |
| 35            | 1             | -0.816089               | -1.736861 | 2.734135  |
| 36            | 1             | 0.624323                | -0.868230 | 3.275702  |
| 37            | 1             | -1.005119               | -3.654958 | -0.001613 |
| 38            | 1             | -1.965214               | -2.467067 | -0.885869 |
| 39            | 1             | -1.964911               | -2.468458 | 0.884829  |
| 40            | 1             | 0.725527                | -2.592540 | -2.892696 |
| 41            | 1             | 0.627014                | -0.868116 | -3.275402 |
| 42            | 1             | -0.813957               | -1.736672 | -2.735125 |
| 43            | 1             | -0.925250               | 2.604202  | -1.122020 |

**M2a** (E = -948.5958698 a.u.)

| Center Number | Atomic Number | Coordinates (Angstroms) |   |   |
|---------------|---------------|-------------------------|---|---|
|               |               | X                       | Y | Z |

|    |    |           |           |           |
|----|----|-----------|-----------|-----------|
| 1  | 22 | 0.541546  | 0.293778  | 0.126413  |
| 2  | 7  | -2.739430 | 0.155835  | -0.222914 |
| 3  | 6  | 1.748233  | -1.554093 | 1.071473  |
| 4  | 6  | 2.454013  | -1.195823 | -0.120194 |
| 5  | 6  | 0.471674  | -2.054028 | 0.701630  |
| 6  | 17 | 0.106227  | 0.711270  | 2.500893  |
| 7  | 6  | 1.613691  | -1.504352 | -1.225149 |
| 8  | 6  | 0.380597  | -2.001962 | -0.721868 |
| 9  | 6  | -1.577490 | 0.191069  | -0.136875 |
| 10 | 6  | -4.199004 | 0.188254  | -0.255402 |
| 11 | 6  | -0.254902 | 2.699651  | 0.199718  |
| 12 | 6  | 1.107528  | 2.635711  | -0.068883 |
| 13 | 1  | -0.988047 | 2.662020  | -0.591043 |
| 14 | 6  | 0.503273  | 1.212320  | -1.944944 |
| 15 | 6  | 1.538457  | 1.873534  | -1.193834 |
| 16 | 1  | -0.428351 | 1.734672  | -2.143679 |
| 17 | 1  | 0.834018  | 0.636602  | -2.800537 |
| 18 | 6  | 2.962008  | 1.985832  | -1.706026 |
| 19 | 6  | 2.103807  | 3.269041  | 0.885744  |
| 20 | 1  | 2.485108  | 4.207060  | 0.456997  |
| 21 | 1  | 2.966392  | 2.625448  | 1.088764  |
| 22 | 1  | 1.622131  | 3.503410  | 1.838530  |
| 23 | 1  | 3.080130  | 2.942956  | -2.237637 |
| 24 | 1  | 3.189064  | 1.193304  | -2.422759 |
| 25 | 1  | 3.714922  | 1.958495  | -0.912894 |
| 26 | 6  | -4.649834 | 1.526678  | 0.369849  |
| 27 | 6  | -4.644738 | 0.088160  | -1.729992 |
| 28 | 1  | -4.298679 | 1.609555  | 1.402577  |
| 29 | 1  | -4.259621 | 2.373077  | -0.203587 |
| 30 | 1  | -4.249369 | 0.925909  | -2.312682 |
| 31 | 1  | -4.298826 | -0.847896 | -2.179329 |
| 32 | 6  | 3.929701  | -0.878849 | -0.165906 |
| 33 | 6  | 2.364525  | -1.603711 | 2.445964  |
| 34 | 6  | -0.551170 | -2.633743 | 1.643837  |
| 35 | 6  | -0.734952 | -2.560206 | -1.571197 |
| 36 | 6  | 2.032826  | -1.573450 | -2.670940 |
| 37 | 1  | 4.515608  | -1.784096 | 0.051526  |
| 38 | 1  | 4.215670  | -0.125423 | 0.576477  |
| 39 | 1  | 4.240868  | -0.515633 | -1.147931 |
| 40 | 1  | 2.983082  | -2.508877 | 2.542357  |
| 41 | 1  | 1.603149  | -1.622646 | 3.227712  |
| 42 | 1  | 3.008625  | -0.739677 | 2.638480  |
| 43 | 1  | -0.305842 | -3.678239 | 1.884533  |
| 44 | 1  | -1.555203 | -2.623155 | 1.208078  |
| 45 | 1  | -0.588484 | -2.068293 | 2.579336  |
| 46 | 1  | -0.474704 | -3.565578 | -1.932483 |
| 47 | 1  | -0.930382 | -1.934771 | -2.448834 |
| 48 | 1  | -1.668291 | -2.645755 | -1.007720 |
| 49 | 1  | 2.471205  | -2.561151 | -2.877266 |
| 50 | 1  | 2.786802  | -0.825237 | -2.929120 |
| 51 | 1  | 1.185400  | -1.446168 | -3.351486 |
| 52 | 1  | -5.737750 | 0.114619  | -1.778815 |
| 53 | 1  | -5.743217 | 1.576008  | 0.365235  |
| 54 | 1  | -0.594890 | 3.088463  | 1.149466  |
| 55 | 6  | -4.722942 | -1.009727 | 0.565542  |
| 56 | 1  | -5.817402 | -1.000418 | 0.561931  |
| 57 | 1  | -4.382612 | -1.955926 | 0.133202  |
| 58 | 1  | -4.376157 | -0.950049 | 1.601459  |

TSM2a-3a (E = -948.5868182 a.u.)

| Center Number | Atomic Number | Coordinates (Angstroms) |   |   |
|---------------|---------------|-------------------------|---|---|
|               |               | X                       | Y | Z |

|    |    |           |           |           |
|----|----|-----------|-----------|-----------|
| 1  | 22 | -1.101113 | -0.609815 | -0.598997 |
| 2  | 7  | -3.105101 | 1.229240  | -2.287967 |
| 3  | 6  | 1.273189  | -1.060977 | -0.891671 |
| 4  | 6  | 1.134738  | -0.278256 | 0.282603  |
| 5  | 6  | 0.828013  | -0.280066 | -1.998913 |
| 6  | 17 | -1.463467 | -2.453011 | -2.137946 |
| 7  | 6  | 0.602240  | 0.996525  | -0.095507 |
| 8  | 6  | 0.417666  | 0.992216  | -1.507305 |
| 9  | 6  | -2.579500 | 0.425864  | -1.546764 |
| 10 | 6  | -4.459111 | 1.714069  | -2.670080 |
| 11 | 6  | -1.784065 | 0.140333  | 1.403762  |
| 12 | 6  | -2.078259 | -1.262010 | 1.461299  |
| 13 | 1  | -2.591565 | 0.839791  | 1.199517  |
| 14 | 6  | -3.560029 | -0.778223 | -0.429399 |
| 15 | 6  | -2.911386 | -1.754967 | 0.459045  |
| 16 | 1  | -4.153749 | -1.256020 | -1.199446 |
| 17 | 1  | -4.094997 | 0.014023  | 0.094159  |
| 18 | 6  | -3.333738 | -3.205636 | 0.380861  |
| 19 | 6  | -1.481564 | -2.158932 | 2.530009  |
| 20 | 1  | -1.090911 | -3.100557 | 2.130348  |
| 21 | 1  | -2.254101 | -2.412845 | 3.269769  |
| 22 | 1  | -0.674841 | -1.648757 | 3.061854  |
| 23 | 1  | -4.190798 | -3.379257 | 1.049438  |
| 24 | 1  | -2.534355 | -3.891302 | 0.676238  |
| 25 | 1  | -3.634829 | -3.466677 | -0.636018 |
| 26 | 6  | -5.365017 | 0.534469  | -3.085270 |
| 27 | 6  | -5.061655 | 2.488046  | -1.476484 |
| 28 | 1  | -4.875193 | -0.080231 | -3.847349 |
| 29 | 1  | -5.620703 | -0.100555 | -2.233314 |
| 30 | 1  | -5.223057 | 1.831157  | -0.616120 |
| 31 | 1  | -4.399641 | 3.305966  | -1.173406 |
| 32 | 6  | 1.648421  | -0.648375 | 1.651549  |
| 33 | 6  | 1.866710  | -2.444277 | -0.977245 |
| 34 | 6  | 0.938090  | -0.653526 | -3.453312 |
| 35 | 6  | 0.066867  | 2.190679  | -2.351920 |
| 36 | 6  | 0.509218  | 2.227610  | 0.771548  |
| 37 | 1  | 2.699702  | -0.343305 | 1.755195  |
| 38 | 1  | 1.603368  | -1.727266 | 1.829029  |
| 39 | 1  | 1.088863  | -0.152945 | 2.450739  |
| 40 | 1  | 2.932481  | -2.388267 | -1.241558 |
| 41 | 1  | 1.360973  | -3.046753 | -1.736909 |
| 42 | 1  | 1.792286  | -2.977841 | -0.024041 |
| 43 | 1  | 1.880085  | -0.267576 | -3.870438 |
| 44 | 1  | 0.115575  | -0.235013 | -4.041672 |
| 45 | 1  | 0.921343  | -1.736514 | -3.592135 |
| 46 | 1  | 0.982220  | 2.727836  | -2.640818 |
| 47 | 1  | -0.576507 | 2.892368  | -1.813418 |
| 48 | 1  | -0.458223 | 1.903618  | -3.266558 |
| 49 | 1  | 1.347339  | 2.905194  | 0.553491  |
| 50 | 1  | 0.556637  | 1.983242  | 1.836184  |
| 51 | 1  | -0.417786 | 2.784807  | 0.597619  |
| 52 | 1  | -6.027517 | 2.915737  | -1.766871 |
| 53 | 1  | -6.297322 | 0.926463  | -3.506353 |
| 54 | 1  | -1.081822 | 0.519059  | 2.135146  |
| 55 | 6  | -4.259227 | 2.664957  | -3.868648 |
| 56 | 1  | -5.221124 | 3.080017  | -4.188142 |
| 57 | 1  | -3.594593 | 3.490925  | -3.595778 |
| 58 | 1  | -3.813400 | 2.128399  | -4.712592 |

**M3a** (E = -948.6252462 a.u.)

| Center Number | Atomic Number | Coordinates (Angstroms) |           |           |
|---------------|---------------|-------------------------|-----------|-----------|
|               |               | X                       | Y         | Z         |
| 1             | 22            | 0.460715                | -0.177701 | -0.280075 |
| 2             | 7             | -1.015668               | 1.187930  | 0.143260  |
| 3             | 6             | 2.580097                | 0.929649  | -0.129739 |

|    |    |           |           |           |
|----|----|-----------|-----------|-----------|
| 4  | 6  | 2.835983  | -0.438849 | -0.443728 |
| 5  | 6  | 1.996242  | 0.982454  | 1.166168  |
| 6  | 17 | 0.232254  | -0.080151 | -2.614392 |
| 7  | 6  | 2.405877  | -1.231170 | 0.657031  |
| 8  | 6  | 1.866908  | -0.351565 | 1.648264  |
| 9  | 6  | -1.166050 | 0.155816  | 0.855442  |
| 10 | 6  | -1.893994 | 2.361893  | -0.189870 |
| 11 | 6  | -0.408370 | -2.168383 | -0.012481 |
| 12 | 6  | -1.892800 | -2.288804 | -0.199718 |
| 13 | 1  | -0.137891 | -2.439226 | 1.011693  |
| 14 | 6  | -2.276065 | -0.544894 | 1.557002  |
| 15 | 6  | -2.777129 | -1.605888 | 0.563399  |
| 16 | 1  | -1.887840 | -1.008499 | 2.472778  |
| 17 | 1  | -3.100370 | 0.114309  | 1.848013  |
| 18 | 6  | -4.282949 | -1.765982 | 0.557215  |
| 19 | 6  | -2.311419 | -3.250916 | -1.297100 |
| 20 | 1  | -3.380572 | -3.230676 | -1.521936 |
| 21 | 1  | -2.034639 | -4.281881 | -1.035201 |
| 22 | 1  | -1.770160 | -3.000455 | -2.218996 |
| 23 | 1  | -4.623626 | -2.541324 | -0.132169 |
| 24 | 1  | -4.788502 | -0.827813 | 0.282994  |
| 25 | 1  | -4.645271 | -2.036272 | 1.560455  |
| 26 | 6  | -3.115512 | 1.844327  | -0.979927 |
| 27 | 6  | -2.329352 | 3.059580  | 1.115744  |
| 28 | 1  | -2.792282 | 1.301328  | -1.872922 |
| 29 | 1  | -3.729947 | 1.176265  | -0.369614 |
| 30 | 1  | -2.920441 | 2.391326  | 1.749801  |
| 31 | 1  | -1.457251 | 3.399391  | 1.684419  |
| 32 | 6  | 3.540476  | -0.936740 | -1.680430 |
| 33 | 6  | 2.947847  | 2.104126  | -1.002349 |
| 34 | 6  | 1.653920  | 2.230533  | 1.940079  |
| 35 | 6  | 1.419786  | -0.757861 | 3.030527  |
| 36 | 6  | 2.651295  | -2.708496 | 0.826963  |
| 37 | 1  | 4.630635  | -0.864292 | -1.556518 |
| 38 | 1  | 3.261878  | -0.354453 | -2.563444 |
| 39 | 1  | 3.299965  | -1.983811 | -1.888723 |
| 40 | 1  | 4.013860  | 2.347668  | -0.888234 |
| 41 | 1  | 2.376239  | 3.000047  | -0.741939 |
| 42 | 1  | 2.767389  | 1.889892  | -2.060385 |
| 43 | 1  | 2.491636  | 2.518078  | 2.590905  |
| 44 | 1  | 0.776710  | 2.086469  | 2.578900  |
| 45 | 1  | 1.447660  | 3.076054  | 1.277276  |
| 46 | 1  | 2.285941  | -0.879769 | 3.696616  |
| 47 | 1  | 0.879004  | -1.710180 | 3.021854  |
| 48 | 1  | 0.763100  | -0.006488 | 3.480322  |
| 49 | 1  | 3.649005  | -2.878696 | 1.255984  |
| 50 | 1  | 2.607874  | -3.243254 | -0.127183 |
| 51 | 1  | 1.922154  | -3.171256 | 1.498285  |
| 52 | 1  | -2.944693 | 3.934444  | 0.878171  |
| 53 | 1  | -3.735354 | 2.692791  | -1.291142 |
| 54 | 1  | 0.126733  | -2.839643 | -0.692109 |
| 55 | 6  | -1.067045 | 3.321238  | -1.063445 |
| 56 | 1  | -1.676457 | 4.184735  | -1.351275 |
| 57 | 1  | -0.190879 | 3.687037  | -0.517321 |
| 58 | 1  | -0.724460 | 2.814225  | -1.970143 |

**TSM3a-3b** (E = -948.6114725 a.u.)

| Center Number | Atomic Number | Coordinates (Angstroms) |           |           |
|---------------|---------------|-------------------------|-----------|-----------|
|               |               | X                       | Y         | Z         |
| 1             | 22            | 0.249380                | -0.285664 | -0.250869 |
| 2             | 7             | -0.885027               | 1.445398  | -0.620983 |
| 3             | 6             | 2.367643                | -1.472894 | 0.276544  |
| 4             | 6             | 1.922531                | -0.789796 | 1.440848  |
| 5             | 6             | 2.692799                | -0.498267 | -0.710303 |
| 6             | 17            | 0.003766                | -1.446345 | -2.252918 |

|    |   |           |           |           |
|----|---|-----------|-----------|-----------|
| 7  | 6 | 1.916267  | 0.607162  | 1.155413  |
| 8  | 6 | 2.415561  | 0.786491  | -0.174249 |
| 9  | 6 | -1.600163 | 0.502217  | -0.183499 |
| 10 | 6 | -1.208674 | 2.829533  | -1.129353 |
| 11 | 6 | -0.895033 | -1.633927 | 1.067630  |
| 12 | 6 | -2.195700 | -2.142588 | 0.516383  |
| 13 | 1 | -1.051406 | -1.031628 | 1.972540  |
| 14 | 6 | -3.012507 | 0.177695  | 0.159571  |
| 15 | 6 | -3.209524 | -1.330769 | 0.149281  |
| 16 | 1 | -3.205017 | 0.610186  | 1.155466  |
| 17 | 1 | -3.729719 | 0.657101  | -0.513051 |
| 18 | 6 | -4.582529 | -1.760267 | -0.322537 |
| 19 | 6 | -2.258265 | -3.655627 | 0.397051  |
| 20 | 1 | -3.138609 | -4.020692 | -0.137169 |
| 21 | 1 | -2.239810 | -4.127557 | 1.389749  |
| 22 | 1 | -1.370655 | -4.011361 | -0.143253 |
| 23 | 1 | -4.723364 | -2.842894 | -0.308107 |
| 24 | 1 | -4.774474 | -1.409410 | -1.348345 |
| 25 | 1 | -5.366934 | -1.320101 | 0.312089  |
| 26 | 6 | -0.718725 | 3.846382  | -0.078848 |
| 27 | 6 | -0.453375 | 3.000307  | -2.462130 |
| 28 | 1 | -1.227390 | 3.693358  | 0.879510  |
| 29 | 1 | 0.358418  | 3.761762  | 0.081888  |
| 30 | 1 | 0.621263  | 2.865113  | -2.323384 |
| 31 | 1 | -0.800295 | 2.267009  | -3.197595 |
| 32 | 6 | 1.708455  | -1.391084 | 2.806172  |
| 33 | 6 | 2.549880  | -2.961629 | 0.125912  |
| 34 | 6 | 3.319016  | -0.786447 | -2.049577 |
| 35 | 6 | 2.828720  | 2.092717  | -0.806528 |
| 36 | 6 | 1.660002  | 1.690040  | 2.178100  |
| 37 | 1 | 2.625959  | -1.287592 | 3.403193  |
| 38 | 1 | 1.469979  | -2.456901 | 2.755586  |
| 39 | 1 | 0.901831  | -0.896461 | 3.357026  |
| 40 | 1 | 3.584039  | -3.256408 | 0.355129  |
| 41 | 1 | 2.330648  | -3.287317 | -0.896098 |
| 42 | 1 | 1.892627  | -3.520489 | 0.799911  |
| 43 | 1 | 4.407435  | -0.904532 | -1.945913 |
| 44 | 1 | 3.138945  | 0.022121  | -2.764686 |
| 45 | 1 | 2.921307  | -1.706211 | -2.488087 |
| 46 | 1 | 3.890547  | 2.290256  | -0.599053 |
| 47 | 1 | 2.259928  | 2.940016  | -0.415878 |
| 48 | 1 | 2.708967  | 2.079022  | -1.894493 |
| 49 | 1 | 2.534419  | 1.813015  | 2.833603  |
| 50 | 1 | 0.804700  | 1.453511  | 2.821795  |
| 51 | 1 | 1.464138  | 2.657388  | 1.708805  |
| 52 | 1 | -0.629473 | 4.004796  | -2.862713 |
| 53 | 1 | -0.933755 | 4.863776  | -0.423811 |
| 54 | 1 | -0.261771 | -2.477606 | 1.347018  |
| 55 | 6 | -2.721528 | 3.009305  | -1.362359 |
| 56 | 1 | -2.903329 | 4.008724  | -1.772657 |
| 57 | 1 | -3.101925 | 2.276284  | -2.080876 |
| 58 | 1 | -3.287818 | 2.922783  | -0.429829 |

**M3b** (E = -948.6138898 a.u.)

| Center Number | Atomic Number | Coordinates (Angstroms) |           |           |
|---------------|---------------|-------------------------|-----------|-----------|
|               |               | X                       | Y         | Z         |
| 1             | 22            | 0.286570                | -0.174147 | -0.190295 |
| 2             | 7             | -0.850112               | 1.558699  | -0.078000 |
| 3             | 6             | 2.306870                | -1.530031 | 0.210431  |
| 4             | 6             | 2.019838                | -0.784537 | 1.388602  |
| 5             | 6             | 2.644564                | -0.608618 | -0.818423 |
| 6             | 17            | -0.114242               | -1.022433 | -2.350798 |
| 7             | 6             | 2.148825                | 0.600967  | 1.076717  |
| 8             | 6             | 2.535547                | 0.708744  | -0.293474 |
| 9             | 6             | -1.566961               | 0.520319  | -0.192512 |

|    |   |           |           |           |
|----|---|-----------|-----------|-----------|
| 10 | 6 | -1.257420 | 3.005871  | 0.076049  |
| 11 | 6 | -0.885753 | -1.496794 | 1.129849  |
| 12 | 6 | -2.187515 | -2.075251 | 0.627593  |
| 13 | 1 | -1.052091 | -0.863771 | 2.014248  |
| 14 | 6 | -2.996474 | 0.138904  | -0.195150 |
| 15 | 6 | -3.176340 | -1.345383 | 0.075120  |
| 16 | 1 | -3.574557 | 0.751471  | 0.513038  |
| 17 | 1 | -3.407069 | 0.375633  | -1.187323 |
| 18 | 6 | -4.538582 | -1.851880 | -0.351150 |
| 19 | 6 | -2.279065 | -3.582140 | 0.806967  |
| 20 | 1 | -3.179117 | -4.026341 | 0.376058  |
| 21 | 1 | -2.240845 | -3.850230 | 1.872354  |
| 22 | 1 | -1.412447 | -4.058742 | 0.328222  |
| 23 | 1 | -4.720948 | -2.892887 | -0.078420 |
| 24 | 1 | -4.665816 | -1.760763 | -1.440897 |
| 25 | 1 | -5.335098 | -1.248206 | 0.109858  |
| 26 | 6 | -1.684772 | 3.224039  | 1.543354  |
| 27 | 6 | -0.051200 | 3.890890  | -0.273661 |
| 28 | 1 | -2.543938 | 2.596564  | 1.803079  |
| 29 | 1 | -0.862964 | 2.987018  | 2.226817  |
| 30 | 1 | 0.777876  | 3.714412  | 0.414482  |
| 31 | 1 | 0.292728  | 3.691709  | -1.293599 |
| 32 | 6 | 1.841254  | -1.332877 | 2.781985  |
| 33 | 6 | 2.342345  | -3.032406 | 0.084987  |
| 34 | 6 | 3.159286  | -0.960963 | -2.188644 |
| 35 | 6 | 2.952996  | 1.956153  | -1.036086 |
| 36 | 6 | 2.120058  | 1.701032  | 2.111880  |
| 37 | 1 | 2.789731  | -1.263807 | 3.334087  |
| 38 | 1 | 1.544364  | -2.385149 | 2.775704  |
| 39 | 1 | 1.088958  | -0.778815 | 3.353989  |
| 40 | 1 | 3.359010  | -3.416408 | 0.251411  |
| 41 | 1 | 2.025530  | -3.357225 | -0.911631 |
| 42 | 1 | 1.686297  | -3.516690 | 0.815477  |
| 43 | 1 | 4.253301  | -1.073616 | -2.163180 |
| 44 | 1 | 2.919216  | -0.186046 | -2.922701 |
| 45 | 1 | 2.732081  | -1.898983 | -2.553047 |
| 46 | 1 | 4.035516  | 1.940137  | -1.224749 |
| 47 | 1 | 2.732654  | 2.861710  | -0.466485 |
| 48 | 1 | 2.455582  | 2.044579  | -2.009058 |
| 49 | 1 | 2.994397  | 1.618652  | 2.773309  |
| 50 | 1 | 1.229156  | 1.652177  | 2.748701  |
| 51 | 1 | 2.150819  | 2.692922  | 1.654900  |
| 52 | 1 | -0.333927 | 4.946892  | -0.204204 |
| 53 | 1 | -1.967765 | 4.271555  | 1.696220  |
| 54 | 1 | -0.241874 | -2.312403 | 1.459970  |
| 55 | 6 | -2.418213 | 3.321735  | -0.892183 |
| 56 | 1 | -2.648602 | 4.391755  | -0.846695 |
| 57 | 1 | -2.140288 | 3.075777  | -1.922885 |
| 58 | 1 | -3.327207 | 2.772195  | -0.634504 |

**TSM3b-4** (E = -948.5964941 a.u.)

| Center Number | Atomic Number | Coordinates (Angstroms) |           |           |
|---------------|---------------|-------------------------|-----------|-----------|
|               |               | X                       | Y         | Z         |
| 1             | 22            | 0.676302                | 0.035695  | -0.662055 |
| 2             | 7             | -0.617453               | 1.508662  | -0.445162 |
| 3             | 6             | 2.828600                | -1.089456 | -0.561374 |
| 4             | 6             | 2.495696                | -0.633099 | 0.743069  |
| 5             | 6             | 3.018280                | 0.054859  | -1.392849 |
| 6             | 17            | 0.239028                | -1.210366 | -2.633387 |
| 7             | 6             | 2.464849                | 0.795514  | 0.714719  |
| 8             | 6             | 2.805777                | 1.218930  | -0.607702 |
| 9             | 6             | -1.218312               | 0.333711  | -0.492203 |
| 10            | 6             | -1.211416               | 2.857472  | -0.187992 |
| 11            | 6             | -0.761053               | -0.941460 | 0.932319  |
| 12            | 6             | -2.138097               | -1.548918 | 1.002119  |

|    |   |           |           |           |
|----|---|-----------|-----------|-----------|
| 13 | 1 | -0.480385 | -0.430771 | 1.859983  |
| 14 | 6 | -2.612336 | -0.082862 | -0.843146 |
| 15 | 6 | -3.051395 | -1.172079 | 0.097219  |
| 16 | 1 | -3.318235 | 0.753301  | -0.799257 |
| 17 | 1 | -2.609394 | -0.435630 | -1.884075 |
| 18 | 6 | -4.451282 | -1.704632 | -0.081437 |
| 19 | 6 | -2.333914 | -2.593303 | 2.080323  |
| 20 | 1 | -3.354476 | -2.984912 | 2.111035  |
| 21 | 1 | -2.104544 | -2.172224 | 3.069022  |
| 22 | 1 | -1.650128 | -3.440552 | 1.929808  |
| 23 | 1 | -4.703804 | -2.484046 | 0.641581  |
| 24 | 1 | -4.575371 | -2.127223 | -1.088466 |
| 25 | 1 | -5.192099 | -0.898555 | 0.018282  |
| 26 | 6 | -2.073116 | 2.803280  | 1.094339  |
| 27 | 6 | -0.076017 | 3.877841  | -0.006334 |
| 28 | 1 | -2.895223 | 2.087391  | 0.998027  |
| 29 | 1 | -1.461568 | 2.509533  | 1.954797  |
| 30 | 1 | 0.545291  | 3.621554  | 0.855275  |
| 31 | 1 | 0.555123  | 3.913162  | -0.898483 |
| 32 | 6 | 2.397896  | -1.476442 | 1.991163  |
| 33 | 6 | 3.056650  | -2.519061 | -0.984054 |
| 34 | 6 | 3.484241  | 0.027868  | -2.826060 |
| 35 | 6 | 3.104962  | 2.626406  | -1.067523 |
| 36 | 6 | 2.341705  | 1.659582  | 1.948805  |
| 37 | 1 | 3.370406  | -1.509968 | 2.503057  |
| 38 | 1 | 2.112170  | -2.509662 | 1.768390  |
| 39 | 1 | 1.669917  | -1.076342 | 2.705143  |
| 40 | 1 | 4.129798  | -2.757940 | -0.971561 |
| 41 | 1 | 2.683502  | -2.697905 | -1.997005 |
| 42 | 1 | 2.554552  | -3.226393 | -0.315930 |
| 43 | 1 | 4.574805  | -0.106060 | -2.874325 |
| 44 | 1 | 3.242419  | 0.960684  | -3.345642 |
| 45 | 1 | 3.019086  | -0.791774 | -3.381736 |
| 46 | 1 | 4.186938  | 2.752464  | -1.213902 |
| 47 | 1 | 2.784156  | 3.370262  | -0.335100 |
| 48 | 1 | 2.618559  | 2.864979  | -2.020044 |
| 49 | 1 | 3.204766  | 1.498596  | 2.610156  |
| 50 | 1 | 1.441415  | 1.434695  | 2.532936  |
| 51 | 1 | 2.317233  | 2.722648  | 1.697663  |
| 52 | 1 | -0.496054 | 4.876516  | 0.157804  |
| 53 | 1 | -2.502757 | 3.790494  | 1.299359  |
| 54 | 1 | -0.048179 | -1.766438 | 0.800275  |
| 55 | 6 | -2.061248 | 3.283684  | -1.411050 |
| 56 | 1 | -2.441449 | 4.301118  | -1.262642 |
| 57 | 1 | -1.448499 | 3.271681  | -2.318792 |
| 58 | 1 | -2.917082 | 2.622002  | -1.567008 |

**M4** (E = -948.6203282 a.u.)

| Center Number | Atomic Number | Coordinates (Angstroms) |           |           |
|---------------|---------------|-------------------------|-----------|-----------|
|               |               | X                       | Y         | Z         |
| 1             | 22            | 0.363126                | -0.240805 | -0.153345 |
| 2             | 7             | -0.539483               | 1.441695  | 0.139279  |
| 3             | 6             | 2.173925                | -1.803774 | 0.095797  |
| 4             | 6             | 1.976783                | -1.120934 | 1.329423  |
| 5             | 6             | 2.617303                | -0.849549 | -0.862284 |
| 6             | 17            | -0.303077               | -1.303817 | -2.148259 |
| 7             | 6             | 2.315704                | 0.253388  | 1.133308  |
| 8             | 6             | 2.711410                | 0.423254  | -0.226946 |
| 9             | 6             | -1.564095               | 0.519567  | 0.114643  |
| 10            | 6             | -0.747859               | 2.911690  | 0.014025  |
| 11            | 6             | -1.648298               | -0.522679 | 1.184667  |
| 12            | 6             | -2.892992               | -1.313921 | 0.861308  |
| 13            | 1             | -1.576643               | -0.156963 | 2.215567  |
| 14            | 6             | -2.804866               | 0.416925  | -0.755759 |
| 15            | 6             | -3.522662               | -0.794993 | -0.204720 |



|    |   |           |           |           |
|----|---|-----------|-----------|-----------|
| 16 | 1 | -3.452530 | 1.301801  | -0.677805 |
| 17 | 1 | -2.560696 | 0.296888  | -1.817373 |
| 18 | 6 | -4.790790 | -1.274304 | -0.857299 |
| 19 | 6 | -3.267015 | -2.510022 | 1.694943  |
| 20 | 1 | -4.210640 | -2.958722 | 1.371403  |
| 21 | 1 | -3.370141 | -2.235511 | 2.754241  |
| 22 | 1 | -2.490878 | -3.286607 | 1.638820  |
| 23 | 1 | -5.236299 | -2.124448 | -0.332333 |
| 24 | 1 | -4.598364 | -1.580246 | -1.894674 |
| 25 | 1 | -5.537802 | -0.469120 | -0.894540 |
| 26 | 6 | -1.822033 | 3.360285  | 1.033932  |
| 27 | 6 | 0.568747  | 3.644627  | 0.319804  |
| 28 | 1 | -2.782976 | 2.871630  | 0.844627  |
| 29 | 1 | -1.505865 | 3.112701  | 2.053757  |
| 30 | 1 | 0.899432  | 3.440129  | 1.341426  |
| 31 | 1 | 1.352517  | 3.336050  | -0.374895 |
| 32 | 6 | 1.645788  | -1.747299 | 2.664719  |
| 33 | 6 | 2.009975  | -3.283351 | -0.147639 |
| 34 | 6 | 3.058587  | -1.151376 | -2.270921 |
| 35 | 6 | 3.370445  | 1.630862  | -0.852220 |
| 36 | 6 | 2.443833  | 1.254352  | 2.256876  |
| 37 | 1 | 2.567225  | -1.977279 | 3.219079  |
| 38 | 1 | 1.090795  | -2.684085 | 2.550393  |
| 39 | 1 | 1.048930  | -1.077659 | 3.294341  |
| 40 | 1 | 2.977880  | -3.798576 | -0.067581 |
| 41 | 1 | 1.607049  | -3.481311 | -1.145714 |
| 42 | 1 | 1.333136  | -3.741863 | 0.580921  |
| 43 | 1 | 4.124331  | -1.423532 | -2.285508 |
| 44 | 1 | 2.927895  | -0.285941 | -2.928356 |
| 45 | 1 | 2.491416  | -1.980779 | -2.701441 |
| 46 | 1 | 4.419709  | 1.406022  | -1.090007 |
| 47 | 1 | 3.367085  | 2.489385  | -0.176339 |
| 48 | 1 | 2.885681  | 1.937513  | -1.786130 |
| 49 | 1 | 3.230813  | 0.934500  | 2.954299  |
| 50 | 1 | 1.518568  | 1.359618  | 2.834505  |
| 51 | 1 | 2.715833  | 2.244546  | 1.885247  |
| 52 | 1 | 0.424427  | 4.725908  | 0.214717  |
| 53 | 1 | -1.971762 | 4.444330  | 0.972883  |
| 54 | 1 | -0.732748 | -1.254888 | 1.149552  |
| 55 | 6 | -1.188325 | 3.271542  | -1.428947 |
| 56 | 1 | -1.299724 | 4.358340  | -1.525140 |
| 57 | 1 | -0.434186 | 2.934548  | -2.148314 |
| 58 | 1 | -2.142933 | 2.808591  | -1.690845 |

**TSM4-5** (E = -948.6150644 a.u.)

| Center Number | Atomic Number | Coordinates (Angstroms) |           |           |
|---------------|---------------|-------------------------|-----------|-----------|
|               |               | X                       | Y         | Z         |
| 1             | 22            | 0.381513                | -0.196601 | -0.194824 |
| 2             | 7             | -0.611104               | 1.445247  | 0.303968  |
| 3             | 6             | 2.103170                | -1.786350 | 0.218325  |
| 4             | 6             | 1.936129                | -1.015366 | 1.407770  |
| 5             | 6             | 2.576054                | -0.912602 | -0.795467 |
| 6             | 17            | -0.218439               | -0.661971 | -2.394780 |
| 7             | 6             | 2.354060                | 0.320030  | 1.137546  |
| 8             | 6             | 2.729364                | 0.396247  | -0.230295 |
| 9             | 6             | -1.676069               | 0.588571  | 0.291056  |
| 10            | 6             | -0.779332               | 2.914038  | 0.081990  |
| 11            | 6             | -1.596622               | -0.633678 | 1.023577  |
| 12            | 6             | -2.808686               | -1.441966 | 0.698118  |
| 13            | 1             | -1.196766               | -0.627740 | 2.035533  |
| 14            | 6             | -2.919470               | 0.528339  | -0.592463 |
| 15            | 6             | -3.557752               | -0.788610 | -0.208834 |
| 16            | 1             | -3.603527               | 1.365033  | -0.403024 |
| 17            | 1             | -2.666808               | 0.554697  | -1.656914 |
| 18            | 6             | -4.862822               | -1.211092 | -0.825587 |

|    |   |           |           |           |
|----|---|-----------|-----------|-----------|
| 19 | 6 | -3.045495 | -2.781103 | 1.340310  |
| 20 | 1 | -3.989629 | -3.229863 | 1.018422  |
| 21 | 1 | -3.068756 | -2.695586 | 2.435597  |
| 22 | 1 | -2.236774 | -3.481353 | 1.088317  |
| 23 | 1 | -5.214484 | -2.170014 | -0.433023 |
| 24 | 1 | -4.767349 | -1.308540 | -1.915789 |
| 25 | 1 | -5.645481 | -0.462252 | -0.638911 |
| 26 | 6 | -1.785000 | 3.465731  | 1.120746  |
| 27 | 6 | 0.579628  | 3.602668  | 0.290975  |
| 28 | 1 | -2.771522 | 3.005051  | 1.007015  |
| 29 | 1 | -1.429306 | 3.266801  | 2.137956  |
| 30 | 1 | 0.941990  | 3.445947  | 1.309439  |
| 31 | 1 | 1.320696  | 3.215159  | -0.411940 |
| 32 | 6 | 1.547724  | -1.544592 | 2.767464  |
| 33 | 6 | 1.904064  | -3.274894 | 0.077076  |
| 34 | 6 | 3.028236  | -1.315695 | -2.175623 |
| 35 | 6 | 3.400651  | 1.546366  | -0.942978 |
| 36 | 6 | 2.517822  | 1.379537  | 2.198944  |
| 37 | 1 | 2.439715  | -1.862543 | 3.326432  |
| 38 | 1 | 0.882489  | -2.410996 | 2.693033  |
| 39 | 1 | 1.042465  | -0.782354 | 3.370889  |
| 40 | 1 | 2.861584  | -3.803976 | 0.187993  |
| 41 | 1 | 1.493583  | -3.536111 | -0.903685 |
| 42 | 1 | 1.220221  | -3.663924 | 0.837724  |
| 43 | 1 | 4.102674  | -1.551583 | -2.166878 |
| 44 | 1 | 2.866337  | -0.515885 | -2.904246 |
| 45 | 1 | 2.492849  | -2.198605 | -2.535183 |
| 46 | 1 | 4.441613  | 1.286135  | -1.181396 |
| 47 | 1 | 3.422522  | 2.448974  | -0.327005 |
| 48 | 1 | 2.905960  | 1.796614  | -1.888610 |
| 49 | 1 | 3.267228  | 1.054667  | 2.933870  |
| 50 | 1 | 1.586964  | 1.573775  | 2.743005  |
| 51 | 1 | 2.860500  | 2.326226  | 1.775770  |
| 52 | 1 | 0.478458  | 4.680752  | 0.123792  |
| 53 | 1 | -1.898030 | 4.549077  | 0.999134  |
| 54 | 1 | -0.488182 | -1.512393 | 0.483697  |
| 55 | 6 | -1.265734 | 3.223268  | -1.357755 |
| 56 | 1 | -1.262492 | 4.307592  | -1.520046 |
| 57 | 1 | -0.600453 | 2.760128  | -2.093744 |
| 58 | 1 | -2.281160 | 2.862802  | -1.537484 |

M5 (E = -948.6231051 a.u.)

| Center Number | Atomic Number | Coordinates (Angstroms) |           |           |
|---------------|---------------|-------------------------|-----------|-----------|
|               |               | X                       | Y         | Z         |
| 1             | 22            | 0.455264                | -0.151595 | -0.348724 |
| 2             | 7             | -0.723934               | 1.236447  | 0.431006  |
| 3             | 6             | 2.039056                | -1.917194 | 0.020254  |
| 4             | 6             | 1.735188                | -1.331552 | 1.286728  |
| 5             | 6             | 2.670525                | -0.920013 | -0.772966 |
| 6             | 17            | 0.359367                | 0.539222  | -2.556169 |
| 7             | 6             | 2.219767                | 0.009199  | 1.289504  |
| 8             | 6             | 2.784653                | 0.270110  | 0.012132  |
| 9             | 6             | -1.794256               | 0.383932  | 0.359172  |
| 10            | 6             | -0.893209               | 2.723999  | 0.447833  |
| 11            | 6             | -1.733623               | -0.880891 | 0.906766  |
| 12            | 6             | -2.863706               | -1.696412 | 0.446134  |
| 13            | 1             | -1.062560               | -1.164239 | 1.704821  |
| 14            | 6             | -3.040864               | 0.429952  | -0.523535 |
| 15            | 6             | -3.646013               | -0.945606 | -0.361782 |
| 16            | 1             | -3.746217               | 1.211433  | -0.217918 |
| 17            | 1             | -2.767160               | 0.638005  | -1.562813 |
| 18            | 6             | -4.942242               | -1.307870 | -1.031391 |
| 19            | 6             | -3.049928               | -3.126304 | 0.878090  |
| 20            | 1             | -3.989626               | -3.547580 | 0.508928  |
| 21            | 1             | -3.048714               | -3.211825 | 1.973240  |

|    |   |           |           |           |
|----|---|-----------|-----------|-----------|
| 22 | 1 | -2.230087 | -3.753526 | 0.502404  |
| 23 | 1 | -5.261762 | -2.324437 | -0.781736 |
| 24 | 1 | -4.855923 | -1.243842 | -2.125247 |
| 25 | 1 | -5.747315 | -0.620389 | -0.734655 |
| 26 | 6 | -1.689363 | 3.109288  | 1.717032  |
| 27 | 6 | 0.505751  | 3.363912  | 0.506006  |
| 28 | 1 | -2.681470 | 2.643565  | 1.715100  |
| 29 | 1 | -1.158862 | 2.780394  | 2.617572  |
| 30 | 1 | 1.054610  | 3.019212  | 1.384487  |
| 31 | 1 | 1.081380  | 3.120343  | -0.392037 |
| 32 | 6 | 1.219880  | -2.068864 | 2.498650  |
| 33 | 6 | 1.903347  | -3.374790 | -0.341022 |
| 34 | 6 | 3.259585  | -1.128349 | -2.144193 |
| 35 | 6 | 3.517890  | 1.513335  | -0.427304 |
| 36 | 6 | 2.258581  | 0.890472  | 2.513633  |
| 37 | 1 | 2.058326  | -2.510683 | 3.056694  |
| 38 | 1 | 0.544733  | -2.886249 | 2.225895  |
| 39 | 1 | 0.689570  | -1.403412 | 3.188579  |
| 40 | 1 | 2.824323  | -3.916062 | -0.079990 |
| 41 | 1 | 1.728793  | -3.509181 | -1.412311 |
| 42 | 1 | 1.073798  | -3.848310 | 0.191837  |
| 43 | 1 | 4.283108  | -1.522634 | -2.063779 |
| 44 | 1 | 3.301283  | -0.193588 | -2.709488 |
| 45 | 1 | 2.671644  | -1.839590 | -2.732208 |
| 46 | 1 | 4.597970  | 1.315126  | -0.470784 |
| 47 | 1 | 3.361780  | 2.345750  | 0.263127  |
| 48 | 1 | 3.204743  | 1.839741  | -1.424721 |
| 49 | 1 | 2.870019  | 0.416284  | 3.293462  |
| 50 | 1 | 1.261987  | 1.062845  | 2.934508  |
| 51 | 1 | 2.705029  | 1.863970  | 2.296537  |
| 52 | 1 | 0.412213  | 4.453859  | 0.565175  |
| 53 | 1 | -1.821866 | 4.196217  | 1.768690  |
| 54 | 1 | -0.136542 | -1.649556 | -0.760130 |
| 55 | 6 | -1.613520 | 3.259195  | -0.817292 |
| 56 | 1 | -1.547355 | 4.353377  | -0.832713 |
| 57 | 1 | -1.139008 | 2.870287  | -1.722813 |
| 58 | 1 | -2.673347 | 2.994581  | -0.832656 |

**M6a** (E = -1199.2807284 a.u.)

| Center Number | Atomic Number | Coordinates (Angstroms) |           |           |
|---------------|---------------|-------------------------|-----------|-----------|
|               |               | X                       | Y         | Z         |
| 1             | 22            | 0.523937                | -0.708355 | 0.086050  |
| 2             | 7             | -1.248381               | -0.742070 | 0.904389  |
| 3             | 6             | 2.008679                | -0.844637 | -1.897967 |
| 4             | 6             | 0.689586                | -1.319484 | -2.204699 |
| 5             | 6             | 2.576557                | -1.708294 | -0.932039 |
| 6             | 17            | 1.894047                | -0.749155 | 2.142258  |
| 7             | 6             | 0.453295                | -2.483093 | -1.420507 |
| 8             | 6             | 1.609300                | -2.703036 | -0.604248 |
| 9             | 6             | -2.199402               | 0.056716  | 0.220260  |
| 10            | 6             | -1.751986               | -1.395891 | 2.189265  |
| 11            | 6             | -3.024824               | -0.291179 | -0.794354 |
| 12            | 6             | -3.843362               | 0.855796  | -1.212430 |
| 13            | 1             | -3.084895               | -1.273816 | -1.244873 |
| 14            | 6             | -2.471924               | 1.516271  | 0.547239  |
| 15            | 6             | -3.533448               | 1.928055  | -0.443651 |
| 16            | 1             | -2.819001               | 1.636459  | 1.581268  |
| 17            | 1             | -1.557047               | 2.113064  | 0.460833  |
| 18            | 6             | -4.099369               | 3.321888  | -0.478794 |
| 19            | 6             | -4.850020               | 0.760301  | -2.330540 |
| 20            | 1             | -5.368245               | 1.709276  | -2.499930 |
| 21            | 1             | -5.609239               | -0.003104 | -2.111440 |
| 22            | 1             | -4.365342               | 0.469144  | -3.272674 |
| 23            | 1             | -4.860843               | 3.433045  | -1.257961 |
| 24            | 1             | -3.315964               | 4.069346  | -0.671573 |

|    |   |           |           |           |
|----|---|-----------|-----------|-----------|
| 25 | 1 | -4.564624 | 3.590929  | 0.480700  |
| 26 | 6 | -3.264424 | -1.710094 | 2.109217  |
| 27 | 6 | -1.005537 | -2.729725 | 2.404699  |
| 28 | 1 | -3.872113 | -0.804656 | 2.020611  |
| 29 | 1 | -3.490293 | -2.354072 | 1.252644  |
| 30 | 1 | -1.224570 | -3.424833 | 1.586601  |
| 31 | 1 | 0.073417  | -2.577190 | 2.469441  |
| 32 | 6 | -0.175740 | -0.826758 | -3.337661 |
| 33 | 6 | 2.696368  | 0.296991  | -2.603637 |
| 34 | 6 | 3.976949  | -1.651108 | -0.383342 |
| 35 | 6 | 1.863773  | -3.885473 | 0.296549  |
| 36 | 6 | -0.713889 | -3.427583 | -1.578355 |
| 37 | 1 | 0.048348  | -1.383788 | -4.259367 |
| 38 | 1 | -0.007888 | 0.235631  | -3.537375 |
| 39 | 1 | -1.239618 | -0.954141 | -3.118763 |
| 40 | 1 | 3.096211  | -0.034901 | -3.572435 |
| 41 | 1 | 3.533759  | 0.689412  | -2.018751 |
| 42 | 1 | 2.006310  | 1.124361  | -2.799821 |
| 43 | 1 | 4.613772  | -2.392370 | -0.887535 |
| 44 | 1 | 3.990181  | -1.862991 | 0.689351  |
| 45 | 1 | 4.431681  | -0.666776 | -0.531389 |
| 46 | 1 | 2.514443  | -4.615208 | -0.206688 |
| 47 | 1 | 0.936430  | -4.400024 | 0.563357  |
| 48 | 1 | 2.357928  | -3.579560 | 1.224197  |
| 49 | 1 | -0.479707 | -4.193682 | -2.331956 |
| 50 | 1 | -1.614785 | -2.904060 | -1.909683 |
| 51 | 1 | -0.954223 | -3.945809 | -0.645794 |
| 52 | 1 | -1.339057 | -3.192447 | 3.341491  |
| 53 | 1 | -3.564792 | -2.234176 | 3.024143  |
| 54 | 1 | -0.119833 | 0.449184  | -0.941884 |
| 55 | 6 | -1.489255 | -0.449951 | 3.386625  |
| 56 | 1 | -1.814970 | -0.924779 | 4.321056  |
| 57 | 1 | -0.423768 | -0.219847 | 3.460556  |
| 58 | 1 | -2.045419 | 0.486888  | 3.273460  |
| 59 | 6 | 1.793082  | 4.542527  | -0.880135 |
| 60 | 6 | 2.135084  | 3.762349  | 0.406730  |
| 61 | 1 | 2.301380  | 4.106698  | -1.745936 |
| 62 | 1 | 0.714434  | 4.534080  | -1.064789 |
| 63 | 1 | 2.120376  | 5.581275  | -0.771813 |
| 64 | 6 | 1.387279  | 4.345354  | 1.626210  |
| 65 | 6 | 3.658700  | 3.735706  | 0.654238  |
| 66 | 1 | 1.606056  | 3.765269  | 2.527449  |
| 67 | 1 | 1.710644  | 5.378749  | 1.785448  |
| 68 | 1 | 0.305913  | 4.340132  | 1.457665  |
| 69 | 1 | 4.018738  | 4.759392  | 0.797555  |
| 70 | 1 | 3.894779  | 3.151556  | 1.548378  |
| 71 | 1 | 4.183592  | 3.298799  | -0.201023 |
| 72 | 7 | 1.683535  | 2.384070  | 0.237138  |
| 73 | 6 | 1.325590  | 1.278517  | 0.167176  |

**TSM6a-7a** (E = -1199.2786235 a.u.)

| Center Number | Atomic Number | Coordinates (Angstroms) |           |           |
|---------------|---------------|-------------------------|-----------|-----------|
|               |               | X                       | Y         | Z         |
| 1             | 22            | -1.000797               | -0.224892 | -0.139255 |
| 2             | 7             | 0.377454                | -1.579387 | -0.479767 |
| 3             | 6             | -2.242649               | 1.299904  | 1.380637  |
| 4             | 6             | -1.521331               | 0.301797  | 2.120787  |
| 5             | 6             | -3.229373               | 0.646444  | 0.603358  |
| 6             | 17            | -2.010802               | -0.099478 | -2.343499 |
| 7             | 6             | -2.072030               | -0.967579 | 1.791178  |
| 8             | 6             | -3.112788               | -0.753300 | 0.827010  |
| 9             | 6             | 1.666143                | -1.317434 | 0.041961  |
| 10            | 6             | 0.279929                | -2.836472 | -1.341943 |
| 11            | 6             | 2.103309                | -1.466385 | 1.313730  |
| 12            | 6             | 3.498199                | -1.019765 | 1.440498  |

|    |   |           |           |           |
|----|---|-----------|-----------|-----------|
| 13 | 1 | 1.514390  | -1.855412 | 2.134576  |
| 14 | 6 | 2.823953  | -0.756212 | -0.771157 |
| 15 | 6 | 3.940072  | -0.592603 | 0.232796  |
| 16 | 1 | 3.121456  | -1.429978 | -1.583017 |
| 17 | 1 | 2.538694  | 0.185692  | -1.253981 |
| 18 | 6 | 5.297642  | -0.073871 | -0.157678 |
| 19 | 6 | 4.245761  | -1.077957 | 2.748158  |
| 20 | 1 | 5.270905  | -0.706759 | 2.653081  |
| 21 | 1 | 4.295049  | -2.108220 | 3.126660  |
| 22 | 1 | 3.740489  | -0.477946 | 3.517525  |
| 23 | 1 | 5.977215  | -0.025912 | 0.699702  |
| 24 | 1 | 5.235797  | 0.935595  | -0.589458 |
| 25 | 1 | 5.767838  | -0.714019 | -0.918297 |
| 26 | 6 | 1.214545  | -3.945476 | -0.802640 |
| 27 | 6 | -1.166609 | -3.372262 | -1.283613 |
| 28 | 1 | 2.270891  | -3.669889 | -0.875718 |
| 29 | 1 | 0.994604  | -4.165973 | 0.247629  |
| 30 | 1 | -1.429016 | -3.654282 | -0.258574 |
| 31 | 1 | -1.881818 | -2.633817 | -1.652922 |
| 32 | 6 | -0.550987 | 0.577547  | 3.242639  |
| 33 | 6 | -2.093700 | 2.789658  | 1.558930  |
| 34 | 6 | -4.273065 | 1.304759  | -0.257789 |
| 35 | 6 | -4.059431 | -1.788971 | 0.273699  |
| 36 | 6 | -1.763893 | -2.266983 | 2.496305  |
| 37 | 1 | -1.092016 | 0.690117  | 4.193686  |
| 38 | 1 | 0.016850  | 1.496790  | 3.070759  |
| 39 | 1 | 0.169965  | -0.235355 | 3.364270  |
| 40 | 1 | -2.734324 | 3.140300  | 2.380672  |
| 41 | 1 | -2.381217 | 3.338379  | 0.657185  |
| 42 | 1 | -1.064446 | 3.067554  | 1.806193  |
| 43 | 1 | -5.228831 | 1.367298  | 0.282569  |
| 44 | 1 | -4.438894 | 0.741461  | -1.180158 |
| 45 | 1 | -3.982285 | 2.320773  | -0.540999 |
| 46 | 1 | -5.032574 | -1.720109 | 0.780541  |
| 47 | 1 | -3.684137 | -2.805424 | 0.418437  |
| 48 | 1 | -4.231412 | -1.640985 | -0.797422 |
| 49 | 1 | -2.386348 | -2.363807 | 3.397799  |
| 50 | 1 | -0.717755 | -2.321714 | 2.810372  |
| 51 | 1 | -1.964999 | -3.135872 | 1.863900  |
| 52 | 1 | -1.254302 | -4.265710 | -1.913320 |
| 53 | 1 | 1.060955  | -4.859366 | -1.388472 |
| 54 | 1 | 0.277215  | 0.628524  | 0.608145  |
| 55 | 6 | 0.644254  | -2.512986 | -2.811497 |
| 56 | 1 | 0.518855  | -3.408324 | -3.433692 |
| 57 | 1 | -0.005209 | -1.723243 | -3.196630 |
| 58 | 1 | 1.684804  | -2.186500 | -2.901232 |
| 59 | 6 | 2.206018  | 3.456074  | 0.367417  |
| 60 | 6 | 1.371461  | 3.650403  | -0.915699 |
| 61 | 1 | 1.579229  | 3.563648  | 1.258725  |
| 62 | 1 | 2.670376  | 2.464994  | 0.388501  |
| 63 | 1 | 2.996075  | 4.213175  | 0.408282  |
| 64 | 6 | 2.246728  | 3.501021  | -2.179194 |
| 65 | 6 | 0.657139  | 5.018061  | -0.912989 |
| 66 | 1 | 1.638592  | 3.597151  | -3.083591 |
| 67 | 1 | 3.011818  | 4.284055  | -2.185607 |
| 68 | 1 | 2.745151  | 2.526759  | -2.195968 |
| 69 | 1 | 1.403066  | 5.819030  | -0.891210 |
| 70 | 1 | 0.044066  | 5.134553  | -1.811785 |
| 71 | 1 | 0.013053  | 5.119512  | -0.033885 |
| 72 | 7 | 0.337872  | 2.607568  | -0.976772 |
| 73 | 6 | -0.190908 | 1.605447  | -0.648194 |

**M7a** (E = -1199.3015263 a.u.)

| Center Number | Atomic Number | Coordinates (Angstroms) |   |   |
|---------------|---------------|-------------------------|---|---|
|               |               | X                       | Y | Z |

|    |    |           |           |           |
|----|----|-----------|-----------|-----------|
| 1  | 22 | 0.859708  | -0.194799 | -0.195658 |
| 2  | 7  | 0.577784  | 1.691659  | -0.450863 |
| 3  | 6  | 1.378370  | -2.163260 | 1.245211  |
| 4  | 6  | 1.343124  | -0.989571 | 2.059536  |
| 5  | 6  | 2.432545  | -2.019499 | 0.314257  |
| 6  | 17 | 1.457046  | -0.669037 | -2.405538 |
| 7  | 6  | 2.397051  | -0.126064 | 1.640429  |
| 8  | 6  | 3.062776  | -0.757966 | 0.550555  |
| 9  | 6  | -0.688114 | 1.828262  | 0.125022  |
| 10 | 6  | 1.144226  | 2.833809  | -1.256614 |
| 11 | 6  | -0.979887 | 1.670507  | 1.448771  |
| 12 | 6  | -2.423144 | 1.751519  | 1.678420  |
| 13 | 1  | -0.243815 | 1.550930  | 2.229491  |
| 14 | 6  | -2.007186 | 2.042380  | -0.604115 |
| 15 | 6  | -3.041527 | 1.983948  | 0.493295  |
| 16 | 1  | -2.052232 | 3.001127  | -1.132273 |
| 17 | 1  | -2.151438 | 1.262314  | -1.359509 |
| 18 | 6  | -4.499700 | 2.221384  | 0.217397  |
| 19 | 6  | -3.033544 | 1.632604  | 3.051636  |
| 20 | 1  | -4.117423 | 1.779246  | 3.031547  |
| 21 | 1  | -2.606263 | 2.377045  | 3.736870  |
| 22 | 1  | -2.837573 | 0.644115  | 3.488068  |
| 23 | 1  | -5.105752 | 2.154422  | 1.126217  |
| 24 | 1  | -4.893767 | 1.491373  | -0.502986 |
| 25 | 1  | -4.661595 | 3.216476  | -0.220958 |
| 26 | 6  | 0.893779  | 4.167016  | -0.514599 |
| 27 | 6  | 2.664364  | 2.621984  | -1.394185 |
| 28 | 1  | -0.175059 | 4.379684  | -0.407642 |
| 29 | 1  | 1.337964  | 4.140468  | 0.486853  |
| 30 | 1  | 3.143379  | 2.618846  | -0.410344 |
| 31 | 1  | 2.883067  | 1.679934  | -1.901985 |
| 32 | 6  | 0.497956  | -0.840611 | 3.301196  |
| 33 | 6  | 0.554298  | -3.406147 | 1.457789  |
| 34 | 6  | 2.902248  | -3.070998 | -0.655294 |
| 35 | 6  | 4.330958  | -0.300333 | -0.124678 |
| 36 | 6  | 2.840276  | 1.131624  | 2.348176  |
| 37 | 1  | 0.803177  | -1.585777 | 4.049155  |
| 38 | 1  | -0.568951 | -0.996016 | 3.106126  |
| 39 | 1  | 0.617764  | 0.145195  | 3.759255  |
| 40 | 1  | 1.094664  | -4.111178 | 2.105993  |
| 41 | 1  | 0.343134  | -3.918290 | 0.514196  |
| 42 | 1  | -0.402417 | -3.185023 | 1.939956  |
| 43 | 1  | 3.616983  | -3.747912 | -0.164552 |
| 44 | 1  | 3.396893  | -2.624634 | -1.521186 |
| 45 | 1  | 2.070546  | -3.675589 | -1.029854 |
| 46 | 1  | 5.182988  | -0.886436 | 0.248279  |
| 47 | 1  | 4.544403  | 0.752913  | 0.072361  |
| 48 | 1  | 4.282985  | -0.438035 | -1.209316 |
| 49 | 1  | 3.470030  | 0.877651  | 3.212793  |
| 50 | 1  | 1.995879  | 1.721351  | 2.717855  |
| 51 | 1  | 3.427491  | 1.779303  | 1.692377  |
| 52 | 1  | 3.097748  | 3.439584  | -1.981457 |
| 53 | 1  | 1.349085  | 4.992694  | -1.073137 |
| 54 | 1  | -1.521893 | -1.254202 | 0.997040  |
| 55 | 6  | 0.514901  | 2.874234  | -2.671255 |
| 56 | 1  | 1.009417  | 3.646489  | -3.272932 |
| 57 | 1  | 0.640471  | 1.908228  | -3.167041 |
| 58 | 1  | -0.551708 | 3.112268  | -2.634352 |
| 59 | 6  | -2.632940 | -3.725495 | -1.577765 |
| 60 | 6  | -2.905119 | -2.291244 | -1.069884 |
| 61 | 1  | -2.093902 | -3.692735 | -2.529848 |
| 62 | 1  | -2.023419 | -4.282131 | -0.856532 |
| 63 | 1  | -3.576234 | -4.264996 | -1.724052 |
| 64 | 6  | -3.643722 | -2.339160 | 0.282136  |

|    |   |           |           |           |
|----|---|-----------|-----------|-----------|
| 65 | 6 | -3.754935 | -1.528797 | -2.109741 |
| 66 | 1 | -3.825746 | -1.332022 | 0.675449  |
| 67 | 1 | -4.613522 | -2.832616 | 0.151460  |
| 68 | 1 | -3.080089 | -2.905638 | 1.032978  |
| 69 | 1 | -4.709017 | -2.042128 | -2.277779 |
| 70 | 1 | -3.968024 | -0.510034 | -1.765813 |
| 71 | 1 | -3.216109 | -1.464680 | -3.060224 |
| 72 | 7 | -1.568085 | -1.606715 | -1.044111 |
| 73 | 6 | -1.024281 | -1.176285 | 0.013123  |

**TSM7a-8a** (E = -1199.3014325 a.u.)

| Center Number | Atomic Number | Coordinates (Angstroms) |           |           |
|---------------|---------------|-------------------------|-----------|-----------|
|               |               | X                       | Y         | Z         |
| 1             | 22            | 0.964655                | -0.159621 | -0.294091 |
| 2             | 7             | 0.661017                | 1.737242  | -0.474314 |
| 3             | 6             | 1.486677                | -2.163659 | 1.105860  |
| 4             | 6             | 1.350896                | -1.022501 | 1.956178  |
| 5             | 6             | 2.584596                | -1.942458 | 0.246061  |
| 6             | 17            | 1.795681                | -0.489415 | -2.479661 |
| 7             | 6             | 2.389889                | -0.102257 | 1.632020  |
| 8             | 6             | 3.143047                | -0.663050 | 0.560922  |
| 9             | 6             | -0.634004               | 1.841476  | 0.042685  |
| 10            | 6             | 1.247598                | 2.924452  | -1.199447 |
| 11            | 6             | -0.998413               | 1.625993  | 1.339459  |
| 12            | 6             | -2.453504               | 1.685164  | 1.489818  |
| 13            | 1             | -0.307720               | 1.473124  | 2.154728  |
| 14            | 6             | -1.912247               | 2.076186  | -0.749873 |
| 15            | 6             | -3.007352               | 1.959232  | 0.282105  |
| 16            | 1             | -1.937998               | 3.057766  | -1.235717 |
| 17            | 1             | -2.001513               | 1.331211  | -1.547429 |
| 18            | 6             | -4.450798               | 2.192122  | -0.066613 |
| 19            | 6             | -3.138377               | 1.504443  | 2.820612  |
| 20            | 1             | -4.222531               | 1.628439  | 2.742975  |
| 21            | 1             | -2.768385               | 2.233073  | 3.554551  |
| 22            | 1             | -2.944290               | 0.505597  | 3.233712  |
| 23            | 1             | -5.105620               | 2.084395  | 0.803739  |
| 24            | 1             | -4.795579               | 1.486105  | -0.834835 |
| 25            | 1             | -4.600792               | 3.201523  | -0.475580 |
| 26            | 6             | 0.922931                | 4.222317  | -0.423749 |
| 27            | 6             | 2.777979                | 2.755179  | -1.255621 |
| 28            | 1             | -0.154299               | 4.411890  | -0.374401 |
| 29            | 1             | 1.305925                | 4.164646  | 0.601386  |
| 30            | 1             | 3.200475                | 2.732332  | -0.246571 |
| 31            | 1             | 3.049354                | 1.836117  | -1.778888 |
| 32            | 6             | 0.424520                | -0.955251 | 3.145653  |
| 33            | 6             | 0.698671                | -3.443112 | 1.219826  |
| 34            | 6             | 3.165692                | -2.937276 | -0.722935 |
| 35            | 6             | 4.436709                | -0.141093 | -0.010502 |
| 36            | 6             | 2.742869                | 1.141756  | 2.410778  |
| 37            | 1             | 0.695929                | -1.733180 | 3.872844  |
| 38            | 1             | -0.624503               | -1.118170 | 2.873612  |
| 39            | 1             | 0.493283                | 0.007008  | 3.660603  |
| 40            | 1             | 1.230588                | -4.158497 | 1.863538  |
| 41            | 1             | 0.555390                | -3.920151 | 0.245234  |
| 42            | 1             | -0.288690               | -3.278047 | 1.660968  |
| 43            | 1             | 3.928731                | -3.552020 | -0.222981 |
| 44            | 1             | 3.634361                | -2.438453 | -1.574566 |
| 45            | 1             | 2.400160                | -3.611693 | -1.118904 |
| 46            | 1             | 5.279288                | -0.728013 | 0.382456  |
| 47            | 1             | 4.611158                | 0.904145  | 0.254961  |
| 48            | 1             | 4.455709                | -0.221689 | -1.101782 |
| 49            | 1             | 3.368550                | 0.880756  | 3.276336  |
| 50            | 1             | 1.857719                | 1.661456  | 2.789553  |
| 51            | 1             | 3.303317                | 1.855483  | 1.801935  |
| 52            | 1             | 3.221126                | 3.602921  | -1.790794 |

|    |   |           |           |           |
|----|---|-----------|-----------|-----------|
| 53 | 1 | 1.394466  | 5.077377  | -0.921361 |
| 54 | 1 | -1.478235 | -1.403914 | 0.746767  |
| 55 | 6 | 0.701418  | 3.006442  | -2.646653 |
| 56 | 1 | 1.205407  | 3.817865  | -3.185836 |
| 57 | 1 | 0.887637  | 2.066174  | -3.171871 |
| 58 | 1 | -0.372679 | 3.210479  | -2.664381 |
| 59 | 6 | -2.102409 | -3.497093 | -2.297935 |
| 60 | 6 | -2.545555 | -2.163604 | -1.654283 |
| 61 | 1 | -1.437734 | -3.305991 | -3.146312 |
| 62 | 1 | -1.564329 | -4.117183 | -1.571799 |
| 63 | 1 | -2.975801 | -4.057075 | -2.652399 |
| 64 | 6 | -3.458942 | -2.432745 | -0.442883 |
| 65 | 6 | -3.288180 | -1.306302 | -2.701431 |
| 66 | 1 | -3.753143 | -1.498760 | 0.050430  |
| 67 | 1 | -4.370009 | -2.941997 | -0.776768 |
| 68 | 1 | -2.970296 | -3.075483 | 0.298843  |
| 69 | 1 | -4.167752 | -1.840906 | -3.078709 |
| 70 | 1 | -3.624511 | -0.359692 | -2.263056 |
| 71 | 1 | -2.625259 | -1.080668 | -3.542797 |
| 72 | 7 | -1.278079 | -1.425920 | -1.325194 |
| 73 | 6 | -0.891832 | -1.155691 | -0.154103 |

**M8a** (E = -1199.3133687 a.u.)

| Center Number | Atomic Number | Coordinates (Angstroms) |           |           |
|---------------|---------------|-------------------------|-----------|-----------|
|               |               | X                       | Y         | Z         |
| 1             | 22            | -0.731354               | -0.120680 | -0.049551 |
| 2             | 7             | -0.271838               | 1.918303  | -0.209715 |
| 3             | 6             | 0.261014                | 1.447803  | 0.825038  |
| 4             | 7             | 0.797563                | -1.108594 | -0.770174 |
| 5             | 6             | -2.275947               | 0.335212  | 1.879296  |
| 6             | 6             | -1.317189               | -0.672236 | 2.222948  |
| 7             | 6             | -3.081994               | -0.162070 | 0.839782  |
| 8             | 17            | -1.900511               | 0.177807  | -2.183987 |
| 9             | 6             | -1.580452               | -1.822806 | 1.421310  |
| 10            | 6             | -2.645915               | -1.498640 | 0.539263  |
| 11            | 6             | -0.285208               | 3.292716  | -0.804890 |
| 12            | 6             | 1.984592                | -0.682991 | -0.138560 |
| 13            | 6             | 0.988711                | -2.067635 | -1.938618 |
| 14            | 6             | 2.390625                | -0.942255 | 1.129757  |
| 15            | 1             | 0.883629                | 1.970090  | 1.555415  |
| 16            | 6             | 3.659152                | -0.265085 | 1.424909  |
| 17            | 1             | 1.863637                | -1.570696 | 1.833973  |
| 18            | 6             | 3.038689                | 0.222744  | -0.767465 |
| 19            | 6             | 4.058773                | 0.422931  | 0.327638  |
| 20            | 1             | 3.499514                | -0.222203 | -1.655757 |
| 21            | 1             | 2.590277                | 1.165126  | -1.101391 |
| 22            | 6             | 5.303396                | 1.240757  | 0.116527  |
| 23            | 6             | 4.350338                | -0.393706 | 2.758460  |
| 24            | 1             | 5.287894                | 0.169575  | 2.791232  |
| 25            | 1             | 4.581598                | -1.444463 | 2.980403  |
| 26            | 1             | 3.709634                | -0.028157 | 3.572520  |
| 27            | 1             | 5.927362                | 1.273730  | 1.015583  |
| 28            | 1             | 5.061773                | 2.277122  | -0.159847 |
| 29            | 1             | 5.916537                | 0.831247  | -0.699198 |
| 30            | 6             | -1.760796               | 3.736977  | -0.886800 |
| 31            | 6             | 0.534725                | 4.266396  | 0.059853  |
| 32            | 6             | 0.313049                | 3.178294  | -2.223062 |
| 33            | 1             | -0.241480               | 2.440922  | -2.808557 |
| 34            | 1             | 1.364661                | 2.873305  | -2.179893 |
| 35            | 1             | 1.580260                | 3.946361  | 0.138909  |
| 36            | 1             | 0.118804                | 4.350166  | 1.070750  |
| 37            | 1             | -2.196685               | 3.828634  | 0.114156  |
| 38            | 1             | -2.342203               | 3.011101  | -1.460771 |
| 39            | 6             | 2.174083                | -3.025074 | -1.663498 |
| 40            | 6             | -0.279533               | -2.929489 | -2.102165 |



|    |   |           |           |           |
|----|---|-----------|-----------|-----------|
| 41 | 6 | 1.231922  | -1.280342 | -3.249511 |
| 42 | 1 | 0.394752  | -0.604001 | -3.438593 |
| 43 | 1 | 2.154492  | -0.693987 | -3.203111 |
| 44 | 1 | 3.132373  | -2.500636 | -1.602212 |
| 45 | 1 | 2.023880  | -3.567653 | -0.723671 |
| 46 | 1 | -0.449150 | -3.536030 | -1.207928 |
| 47 | 1 | -1.156308 | -2.308471 | -2.289983 |
| 48 | 6 | -0.408454 | -0.619139 | 3.425981  |
| 49 | 6 | -2.431789 | 1.651740  | 2.596212  |
| 50 | 6 | -4.283713 | 0.503689  | 0.223650  |
| 51 | 6 | -3.385734 | -2.427121 | -0.388628 |
| 52 | 6 | -0.955116 | -3.181956 | 1.627504  |
| 53 | 1 | -1.000816 | -0.691321 | 4.349787  |
| 54 | 1 | 0.164742  | 0.312843  | 3.476325  |
| 55 | 1 | 0.303517  | -1.448785 | 3.430292  |
| 56 | 1 | -3.040004 | 1.524099  | 3.503187  |
| 57 | 1 | -2.927340 | 2.400706  | 1.971385  |
| 58 | 1 | -1.466355 | 2.062649  | 2.911560  |
| 59 | 1 | -5.209268 | 0.047181  | 0.603464  |
| 60 | 1 | -4.276623 | 0.399950  | -0.865502 |
| 61 | 1 | -4.320639 | 1.571859  | 0.459296  |
| 62 | 1 | -4.376497 | -2.661801 | 0.026522  |
| 63 | 1 | -2.855521 | -3.371680 | -0.534004 |
| 64 | 1 | -3.535000 | -1.967560 | -1.371167 |
| 65 | 1 | -1.287899 | -3.608020 | 2.584527  |
| 66 | 1 | 0.138490  | -3.143124 | 1.643035  |
| 67 | 1 | -1.247138 | -3.880527 | 0.839599  |
| 68 | 1 | 0.519789  | 5.262175  | -0.395375 |
| 69 | 1 | -1.823857 | 4.713682  | -1.379390 |
| 70 | 1 | 0.258675  | 4.150913  | -2.724846 |
| 71 | 1 | -0.150259 | -3.608251 | -2.953794 |
| 72 | 1 | 2.242095  | -3.756339 | -2.477209 |
| 73 | 1 | 1.319676  | -1.977726 | -4.092183 |

**TSM8a-9a** (E = -1199.2979755 a.u.)

| Center Number | Atomic Number | Coordinates (Angstroms) |           |           |
|---------------|---------------|-------------------------|-----------|-----------|
|               |               | X                       | Y         | Z         |
| 1             | 22            | -0.571625               | -0.361634 | 0.101395  |
| 2             | 7             | -1.929529               | 0.983771  | -0.395177 |
| 3             | 6             | -2.104221               | 0.725590  | 0.864208  |
| 4             | 7             | 0.812186                | 1.067251  | 0.902320  |
| 5             | 6             | -2.048428               | -2.274873 | 0.469659  |
| 6             | 6             | -1.331521               | -1.994427 | 1.677254  |
| 7             | 6             | -1.115785               | -2.693222 | -0.503637 |
| 8             | 17            | 0.197918                | -0.265555 | -2.227387 |
| 9             | 6             | 0.047328                | -2.275465 | 1.447741  |
| 10            | 6             | 0.187874                | -2.683965 | 0.091439  |
| 11            | 6             | -2.728515               | 1.802888  | -1.354955 |
| 12            | 6             | 0.176054                | 2.013442  | 1.596399  |
| 13            | 6             | 2.270417                | 1.268028  | 0.511902  |
| 14            | 6             | -1.012579               | 1.763032  | 2.322339  |
| 15            | 1             | -3.042264               | 0.760605  | 1.412156  |
| 16            | 6             | -1.570940               | 3.049062  | 2.784799  |
| 17            | 1             | -1.100568               | 0.876971  | 2.935039  |
| 18            | 6             | 0.364119                | 3.531058  | 1.553011  |
| 19            | 6             | -0.813210               | 4.071402  | 2.335067  |
| 20            | 1             | 1.310112                | 3.872733  | 1.982651  |
| 21            | 1             | 0.356538                | 3.876268  | 0.514033  |
| 22            | 6             | -0.984316               | 5.551653  | 2.539846  |
| 23            | 6             | -2.809766               | 3.109756  | 3.639685  |
| 24            | 1             | -3.056986               | 4.133683  | 3.935634  |
| 25            | 1             | -2.679344               | 2.515915  | 4.555092  |
| 26            | 1             | -3.678814               | 2.695049  | 3.110792  |
| 27            | 1             | -1.861634               | 5.780166  | 3.153353  |
| 28            | 1             | -1.101585               | 6.080031  | 1.582436  |

|    |   |           |           |           |
|----|---|-----------|-----------|-----------|
| 29 | 1 | -0.105573 | 5.988687  | 3.036507  |
| 30 | 6 | -3.274185 | 0.863432  | -2.452394 |
| 31 | 6 | -3.892029 | 2.500124  | -0.622215 |
| 32 | 6 | -1.785085 | 2.854757  | -1.978547 |
| 33 | 1 | -0.936997 | 2.360010  | -2.458328 |
| 34 | 1 | -1.406832 | 3.535205  | -1.207181 |
| 35 | 1 | -3.519321 | 3.141510  | 0.184576  |
| 36 | 1 | -4.588322 | 1.769634  | -0.193771 |
| 37 | 1 | -3.954993 | 0.120850  | -2.020330 |
| 38 | 1 | -2.452242 | 0.340851  | -2.947485 |
| 39 | 6 | 3.104295  | 1.702954  | 1.744078  |
| 40 | 6 | 2.835322  | -0.092381 | 0.054283  |
| 41 | 6 | 2.420665  | 2.278167  | -0.650469 |
| 42 | 1 | 1.776971  | 1.987990  | -1.485416 |
| 43 | 1 | 2.177062  | 3.299779  | -0.349199 |
| 44 | 1 | 2.849185  | 2.700238  | 2.106978  |
| 45 | 1 | 2.965805  | 0.991430  | 2.566067  |
| 46 | 1 | 2.765923  | -0.826172 | 0.860993  |
| 47 | 1 | 2.309050  | -0.466037 | -0.824819 |
| 48 | 6 | -1.953531 | -1.736629 | 3.026133  |
| 49 | 6 | -3.548303 | -2.240647 | 0.320413  |
| 50 | 6 | -1.425140 | -3.202443 | -1.886642 |
| 51 | 6 | 1.420340  | -3.221520 | -0.589997 |
| 52 | 6 | 1.104637  | -2.295634 | 2.527434  |
| 53 | 1 | -2.260014 | -2.686308 | 3.488984  |
| 54 | 1 | -2.845707 | -1.106214 | 2.956261  |
| 55 | 1 | -1.250475 | -1.254998 | 3.713522  |
| 56 | 1 | -3.991134 | -3.179072 | 0.683788  |
| 57 | 1 | -3.849274 | -2.117140 | -0.724112 |
| 58 | 1 | -3.997442 | -1.425072 | 0.896997  |
| 59 | 1 | -1.448192 | -4.302158 | -1.887550 |
| 60 | 1 | -0.671315 | -2.875357 | -2.607302 |
| 61 | 1 | -2.398310 | -2.849690 | -2.241516 |
| 62 | 1 | 1.309273  | -4.299128 | -0.775961 |
| 63 | 1 | 2.319211  | -3.082377 | 0.016392  |
| 64 | 1 | 1.584298  | -2.733269 | -1.556998 |
| 65 | 1 | 0.879220  | -3.082257 | 3.260836  |
| 66 | 1 | 1.166264  | -1.346386 | 3.071235  |
| 67 | 1 | 2.095180  | -2.508616 | 2.117169  |
| 68 | 1 | -4.450609 | 3.124804  | -1.327797 |
| 69 | 1 | -3.828219 | 1.445199  | -3.198434 |
| 70 | 1 | -2.324819 | 3.447840  | -2.726584 |
| 71 | 1 | 3.893484  | 0.025232  | -0.205916 |
| 72 | 1 | 4.166563  | 1.711946  | 1.475352  |
| 73 | 1 | 3.460274  | 2.275625  | -0.999073 |

**M9a** (E = -1199.3305563 a.u.)

| Center Number | Atomic Number | Coordinates (Angstroms) |           |           |
|---------------|---------------|-------------------------|-----------|-----------|
|               |               | X                       | Y         | Z         |
| 1             | 22            | 0.877845                | -0.083160 | -0.126242 |
| 2             | 7             | -0.332132               | -1.448883 | -0.546176 |
| 3             | 6             | -0.698873               | -1.136828 | 0.763059  |
| 4             | 7             | -0.759836               | 1.580253  | -0.054449 |
| 5             | 6             | 2.444727                | -1.336001 | 1.150994  |
| 6             | 6             | 1.870534                | -0.368355 | 2.032123  |
| 7             | 6             | 3.215071                | -0.636592 | 0.182205  |
| 8             | 17            | 1.437464                | 0.395096  | -2.441320 |
| 9             | 6             | 2.306675                | 0.923721  | 1.610600  |
| 10            | 6             | 3.139786                | 0.757977  | 0.470926  |
| 11            | 6             | -0.753563               | -2.613439 | -1.370142 |
| 12            | 6             | -1.862144               | 1.082881  | 0.377300  |
| 13            | 6             | -0.719364               | 2.941855  | -0.746545 |
| 14            | 6             | -1.869099               | -0.224570 | 1.135495  |
| 15            | 1             | -0.521256               | -1.895770 | 1.528870  |
| 16            | 6             | -3.327558               | -0.669572 | 1.073801  |

|    |   |           |           |           |
|----|---|-----------|-----------|-----------|
| 17 | 1 | -1.670213 | 0.042573  | 2.189426  |
| 18 | 6 | -3.306504 | 1.533400  | 0.218142  |
| 19 | 6 | -4.106745 | 0.295872  | 0.566335  |
| 20 | 1 | -3.540254 | 2.342746  | 0.921426  |
| 21 | 1 | -3.523740 | 1.918902  | -0.780348 |
| 22 | 6 | -5.600024 | 0.312196  | 0.378770  |
| 23 | 6 | -3.754778 | -1.986694 | 1.659750  |
| 24 | 1 | -4.842311 | -2.105241 | 1.656967  |
| 25 | 1 | -3.407000 | -2.074507 | 2.699178  |
| 26 | 1 | -3.323253 | -2.831512 | 1.111065  |
| 27 | 1 | -6.067225 | -0.626955 | 0.688510  |
| 28 | 1 | -5.858867 | 0.484378  | -0.675574 |
| 29 | 1 | -6.060844 | 1.126431  | 0.956544  |
| 30 | 6 | 0.298484  | -2.875820 | -2.465892 |
| 31 | 6 | -0.895514 | -3.883870 | -0.499929 |
| 32 | 6 | -2.110100 | -2.269385 | -2.034521 |
| 33 | 1 | -1.996743 | -1.390438 | -2.677811 |
| 34 | 1 | -2.872136 | -2.048305 | -1.280129 |
| 35 | 1 | -1.626540 | -3.745904 | 0.302066  |
| 36 | 1 | 0.064499  | -4.152007 | -0.046545 |
| 37 | 1 | 1.270355  | -3.115153 | -2.019368 |
| 38 | 1 | 0.427928  | -1.997891 | -3.100971 |
| 39 | 6 | -1.536355 | 4.011938  | 0.022417  |
| 40 | 6 | 0.746188  | 3.419538  | -0.758560 |
| 41 | 6 | -1.218407 | 2.802938  | -2.203609 |
| 42 | 1 | -0.605753 | 2.079764  | -2.746199 |
| 43 | 1 | -2.263369 | 2.483519  | -2.252739 |
| 44 | 1 | -2.612835 | 3.930562  | -0.134580 |
| 45 | 1 | -1.329745 | 3.963555  | 1.098111  |
| 46 | 1 | 1.105346  | 3.588828  | 0.259714  |
| 47 | 1 | 1.392763  | 2.698812  | -1.258926 |
| 48 | 6 | 1.189908  | -0.646176 | 3.349011  |
| 49 | 6 | 2.395187  | -2.831740 | 1.340251  |
| 50 | 6 | 4.078957  | -1.250968 | -0.889647 |
| 51 | 6 | 3.920730  | 1.817069  | -0.264168 |
| 52 | 6 | 2.060355  | 2.190920  | 2.396057  |
| 53 | 1 | 1.919215  | -0.588426 | 4.171070  |
| 54 | 1 | 0.744155  | -1.644223 | 3.376471  |
| 55 | 1 | 0.399120  | 0.080978  | 3.564377  |
| 56 | 1 | 3.172997  | -3.153422 | 2.048160  |
| 57 | 1 | 2.565256  | -3.365727 | 0.400663  |
| 58 | 1 | 1.431620  | -3.161185 | 1.741187  |
| 59 | 1 | 5.117054  | -1.341612 | -0.537207 |
| 60 | 1 | 4.079208  | -0.641542 | -1.797356 |
| 61 | 1 | 3.734666  | -2.252900 | -1.164534 |
| 62 | 1 | 4.998558  | 1.676632  | -0.102076 |
| 63 | 1 | 3.663884  | 2.824342  | 0.075621  |
| 64 | 1 | 3.738682  | 1.767062  | -1.343732 |
| 65 | 1 | 2.499807  | 2.104407  | 3.399594  |
| 66 | 1 | 0.992603  | 2.403301  | 2.526610  |
| 67 | 1 | 2.517954  | 3.059285  | 1.914585  |
| 68 | 1 | -1.226434 | -4.723739 | -1.121800 |
| 69 | 1 | -0.014773 | -3.725199 | -3.084963 |
| 70 | 1 | -2.460134 | -3.109140 | -2.647794 |
| 71 | 1 | 0.809751  | 4.368437  | -1.302800 |
| 72 | 1 | -1.232693 | 5.002792  | -0.331616 |
| 73 | 1 | -1.140446 | 3.775027  | -2.704362 |

**M10** (E = -1199.3122662 a.u.)

| Center Number | Atomic Number | Coordinates (Angstroms) |   |   |
|---------------|---------------|-------------------------|---|---|
|               |               | X                       | Y | Z |

|    |    |           |           |           |
|----|----|-----------|-----------|-----------|
| 1  | 22 | 1.680478  | -0.272988 | -0.420040 |
| 2  | 7  | 0.179727  | -1.315297 | -0.261540 |
| 3  | 6  | -0.324008 | -0.056485 | 0.139132  |
| 4  | 7  | -3.539001 | -0.393125 | -0.403396 |
| 5  | 6  | 2.488144  | -0.294243 | 1.794714  |
| 6  | 6  | 2.359761  | 1.081826  | 1.423323  |
| 7  | 6  | 3.500644  | -0.873598 | 0.979692  |
| 8  | 17 | 2.122307  | 0.013199  | -2.696411 |
| 9  | 6  | 3.314231  | 1.347099  | 0.393276  |
| 10 | 6  | 4.009570  | 0.141205  | 0.112753  |
| 11 | 6  | -0.420484 | -2.674729 | -0.272985 |
| 12 | 6  | -2.792116 | 0.590514  | -0.124272 |
| 13 | 6  | -4.942716 | -0.573867 | 0.078821  |
| 14 | 6  | -1.371221 | 0.711392  | -0.712976 |
| 15 | 1  | -0.534584 | 0.059230  | 1.209270  |
| 16 | 6  | -1.152985 | 2.218091  | -0.682342 |
| 17 | 1  | -1.345791 | 0.312623  | -1.731038 |
| 18 | 6  | -3.050594 | 1.867186  | 0.681207  |
| 19 | 6  | -2.043500 | 2.837988  | 0.107553  |
| 20 | 1  | -4.075861 | 2.230357  | 0.576094  |
| 21 | 1  | -2.890652 | 1.699185  | 1.755380  |
| 22 | 6  | -2.152451 | 4.301560  | 0.443028  |
| 23 | 6  | -0.050020 | 2.846408  | -1.484961 |
| 24 | 1  | 0.001315  | 3.930309  | -1.344481 |
| 25 | 1  | -0.188252 | 2.644523  | -2.555499 |
| 26 | 1  | 0.929585  | 2.427688  | -1.223456 |
| 27 | 1  | -1.371041 | 4.900423  | -0.033763 |
| 28 | 1  | -2.082897 | 4.458606  | 1.529244  |
| 29 | 1  | -3.125671 | 4.703971  | 0.127453  |
| 30 | 6  | 0.737496  | -3.689310 | -0.384872 |
| 31 | 6  | -1.215986 | -2.919554 | 1.026562  |
| 32 | 6  | -1.342542 | -2.810236 | -1.507964 |
| 33 | 1  | -0.773125 | -2.618923 | -2.424275 |
| 34 | 1  | -2.173940 | -2.103377 | -1.446131 |
| 35 | 1  | -2.034357 | -2.199708 | 1.115790  |
| 36 | 1  | -0.566220 | -2.829171 | 1.904496  |
| 37 | 1  | 1.400528  | -3.625192 | 0.484627  |
| 38 | 1  | 1.323251  | -3.507311 | -1.293861 |
| 39 | 6  | -5.882426 | 0.357505  | -0.723942 |
| 40 | 6  | -5.301513 | -2.042185 | -0.248844 |
| 41 | 6  | -5.110927 | -0.358140 | 1.602253  |
| 42 | 1  | -4.367164 | -0.943462 | 2.155793  |
| 43 | 1  | -5.011751 | 0.690313  | 1.893286  |
| 44 | 1  | -5.685150 | 1.413851  | -0.516152 |
| 45 | 1  | -5.752260 | 0.189866  | -1.798599 |
| 46 | 1  | -5.175185 | -2.232133 | -1.319627 |
| 47 | 1  | -4.645409 | -2.728227 | 0.298018  |
| 48 | 6  | 1.528600  | 2.108885  | 2.151136  |
| 49 | 6  | 1.779588  | -0.949753 | 2.953731  |
| 50 | 6  | 4.037937  | -2.283062 | 1.066531  |
| 51 | 6  | 5.155615  | -0.008450 | -0.854628 |
| 52 | 6  | 3.613697  | 2.682083  | -0.243679 |
| 53 | 1  | 2.102959  | 2.544172  | 2.981689  |
| 54 | 1  | 0.620712  | 1.667489  | 2.572087  |
| 55 | 1  | 1.220178  | 2.927841  | 1.494857  |
| 56 | 1  | 2.268449  | -0.681068 | 3.900831  |
| 57 | 1  | 1.792291  | -2.040408 | 2.873611  |
| 58 | 1  | 0.733758  | -0.634501 | 3.024857  |
| 59 | 1  | 5.021234  | -2.282510 | 1.556945  |
| 60 | 1  | 4.170997  | -2.739535 | 0.078746  |
| 61 | 1  | 3.380733  | -2.933620 | 1.649643  |
| 62 | 1  | 6.096396  | 0.315377  | -0.386503 |
| 63 | 1  | 5.002739  | 0.594651  | -1.754426 |
| 64 | 1  | 5.285619  | -1.047929 | -1.171492 |

|    |   |           |           |           |
|----|---|-----------|-----------|-----------|
| 65 | 1 | 4.571076  | 3.073792  | 0.127425  |
| 66 | 1 | 2.844710  | 3.424516  | -0.012393 |
| 67 | 1 | 3.691924  | 2.603685  | -1.333820 |
| 68 | 1 | -1.643950 | -3.928895 | 1.018164  |
| 69 | 1 | 0.342663  | -4.710205 | -0.438217 |
| 70 | 1 | -1.750076 | -3.828069 | -1.557565 |
| 71 | 1 | -6.339975 | -2.258940 | 0.027398  |
| 72 | 1 | -6.927559 | 0.149295  | -0.466874 |
| 73 | 1 | -6.105823 | -0.697049 | 1.913416  |

**TSM10-11** (E = -1199.2872637 a.u.)

| Center Number | Atomic Number | Coordinates (Angstroms) |           |           |
|---------------|---------------|-------------------------|-----------|-----------|
|               |               | X                       | Y         | Z         |
| 1             | 22            | 1.013713                | -0.048371 | -0.216503 |
| 2             | 7             | 0.283291                | -0.892830 | 1.341212  |
| 3             | 6             | -0.323181               | 0.333670  | 1.489745  |
| 4             | 7             | -2.475216               | -1.112350 | -0.131341 |
| 5             | 6             | 3.261934                | 0.348769  | 0.339596  |
| 6             | 6             | 2.578447                | 1.589322  | 0.516289  |
| 7             | 6             | 3.248048                | 0.042385  | -1.054740 |
| 8             | 17            | 0.582168                | -1.602235 | -1.926307 |
| 9             | 6             | 2.143671                | 2.041620  | -0.769642 |
| 10            | 6             | 2.562933                | 1.085665  | -1.735526 |
| 11            | 6             | 0.419144                | -1.874921 | 2.443489  |
| 12            | 6             | -2.218450               | 0.102256  | -0.338357 |
| 13            | 6             | -3.553590               | -1.886071 | -0.818346 |
| 14            | 6             | -1.131322               | 0.867593  | 0.437663  |
| 15            | 1             | -0.092519               | 0.971806  | 2.343813  |
| 16            | 6             | -1.691966               | 2.263923  | 0.526262  |
| 17            | 1             | -0.261635               | 1.008043  | -0.770788 |
| 18            | 6             | -2.907343               | 1.175054  | -1.183122 |
| 19            | 6             | -2.663872               | 2.436454  | -0.387850 |
| 20            | 1             | -2.450321               | 1.233043  | -2.181248 |
| 21            | 1             | -3.970111               | 0.984365  | -1.330458 |
| 22            | 6             | -3.486463               | 3.662875  | -0.668470 |
| 23            | 6             | -1.247274               | 3.252669  | 1.570690  |
| 24            | 1             | -1.708889               | 4.231810  | 1.416495  |
| 25            | 1             | -0.162091               | 3.388814  | 1.574872  |
| 26            | 1             | -1.528327               | 2.908714  | 2.575500  |
| 27            | 1             | -3.193510               | 4.518606  | -0.054079 |
| 28            | 1             | -4.552974               | 3.466783  | -0.489026 |
| 29            | 1             | -3.392368               | 3.955260  | -1.723835 |
| 30            | 6             | 1.294930                | -3.031471 | 1.927180  |
| 31            | 6             | 1.056505                | -1.231316 | 3.698472  |
| 32            | 6             | -0.987815               | -2.406918 | 2.805025  |
| 33            | 1             | -1.461805               | -2.848248 | 1.926536  |
| 34            | 1             | -1.627712               | -1.590098 | 3.157847  |
| 35            | 1             | 0.435809                | -0.416705 | 4.089055  |
| 36            | 1             | 2.052287                | -0.837084 | 3.476562  |
| 37            | 1             | 2.299524                | -2.678102 | 1.673093  |
| 38            | 1             | 0.848167                | -3.472161 | 1.030548  |
| 39            | 6             | -3.526248               | -1.719747 | -2.357099 |
| 40            | 6             | -3.267048               | -3.368407 | -0.484846 |
| 41            | 6             | -4.930768               | -1.499068 | -0.228646 |
| 42            | 1             | -4.922039               | -1.613160 | 0.861111  |
| 43            | 1             | -5.202504               | -0.464837 | -0.462528 |
| 44            | 1             | -3.857440               | -0.729442 | -2.680404 |
| 45            | 1             | -2.512012               | -1.887872 | -2.734532 |
| 46            | 1             | -2.273437               | -3.649427 | -0.848255 |
| 47            | 1             | -3.293584               | -3.526656 | 0.598181  |
| 48            | 6             | 2.583617                | 2.383910  | 1.801085  |
| 49            | 6             | 4.115153                | -0.342353 | 1.375146  |
| 50            | 6             | 3.954354                | -1.121771 | -1.701346 |
| 51            | 6             | 2.357468                | 1.179643  | -3.224988 |
| 52            | 6             | 1.518557                | 3.377506  | -1.092528 |

|    |   |           |           |           |
|----|---|-----------|-----------|-----------|
| 53 | 1 | 3.592880  | 2.774921  | 1.994218  |
| 54 | 1 | 2.297364  | 1.779906  | 2.668661  |
| 55 | 1 | 1.909606  | 3.242789  | 1.753922  |
| 56 | 1 | 5.147965  | 0.033491  | 1.322306  |
| 57 | 1 | 4.156288  | -1.425135 | 1.222244  |
| 58 | 1 | 3.753283  | -0.160240 | 2.390393  |
| 59 | 1 | 4.996479  | -0.853087 | -1.928199 |
| 60 | 1 | 3.468269  | -1.417545 | -2.634221 |
| 61 | 1 | 3.973965  | -1.999792 | -1.047775 |
| 62 | 1 | 3.247642  | 1.600495  | -3.714245 |
| 63 | 1 | 1.507336  | 1.822752  | -3.473954 |
| 64 | 1 | 2.166001  | 0.194725  | -3.661144 |
| 65 | 1 | 2.291919  | 4.087866  | -1.417856 |
| 66 | 1 | 1.014040  | 3.816415  | -0.228796 |
| 67 | 1 | 0.783071  | 3.298545  | -1.899246 |
| 68 | 1 | 1.154444  | -1.982683 | 4.490297  |
| 69 | 1 | 1.387827  | -3.809613 | 2.693122  |
| 70 | 1 | -0.912144 | -3.160254 | 3.598254  |
| 71 | 1 | -4.013025 | -4.021647 | -0.952378 |
| 72 | 1 | -4.192233 | -2.459128 | -2.816742 |
| 73 | 1 | -5.708498 | -2.155015 | -0.636575 |

**M11** (E = -1199.3007068 a.u.)

| Center Number | Atomic Number | Coordinates (Angstroms) |           |           |
|---------------|---------------|-------------------------|-----------|-----------|
|               |               | X                       | Y         | Z         |
| 1             | 22            | 0.957871                | -0.146659 | -0.336310 |
| 2             | 7             | 0.305442                | -0.846008 | 1.337549  |
| 3             | 6             | -0.365512               | 0.305811  | 1.711350  |
| 4             | 7             | -2.500390               | -0.972862 | -0.107251 |
| 5             | 6             | 3.144222                | 0.514407  | 0.313079  |
| 6             | 6             | 2.384137                | 1.695579  | 0.073825  |
| 7             | 6             | 3.283382                | -0.167125 | -0.930527 |
| 8             | 17            | 0.632076                | -1.940884 | -1.775470 |
| 9             | 6             | 2.083639                | 1.760341  | -1.323228 |
| 10            | 6             | 2.643319                | 0.610670  | -1.939637 |
| 11            | 6             | 0.542828                | -1.926582 | 2.341886  |
| 12            | 6             | -2.302618               | 0.275581  | -0.031321 |
| 13            | 6             | -3.468282               | -1.631572 | -1.031450 |
| 14            | 6             | -1.389636               | 0.882627  | 1.002142  |
| 15            | 1             | 0.000218                | 0.847738  | 2.586511  |
| 16            | 6             | -1.887277               | 2.248233  | 1.236095  |
| 17            | 1             | -0.077631               | 0.847533  | -1.194157 |
| 18            | 6             | -2.996572               | 1.464771  | -0.701457 |
| 19            | 6             | -2.782471               | 2.589227  | 0.281328  |
| 20            | 1             | -2.522001               | 1.689040  | -1.665878 |
| 21            | 1             | -4.055430               | 1.288418  | -0.896985 |
| 22            | 6             | -3.522248               | 3.884091  | 0.106545  |
| 23            | 6             | -1.452366               | 3.083667  | 2.412995  |
| 24            | 1             | -1.947173               | 4.058524  | 2.420480  |
| 25            | 1             | -0.370330               | 3.256467  | 2.413512  |
| 26            | 1             | -1.697776               | 2.577750  | 3.356523  |
| 27            | 1             | -3.263149               | 4.626327  | 0.866541  |
| 28            | 1             | -4.608402               | 3.719773  | 0.148918  |
| 29            | 1             | -3.309069               | 4.319164  | -0.880343 |
| 30            | 6             | 1.510881                | -2.954255 | 1.727163  |
| 31            | 6             | 1.123398                | -1.375120 | 3.666434  |
| 32            | 6             | -0.817371               | -2.610202 | 2.626058  |
| 33            | 1             | -1.249895               | -2.991549 | 1.698230  |
| 34            | 1             | -1.526041               | -1.894939 | 3.058453  |
| 35            | 1             | 0.427468                | -0.686421 | 4.158388  |
| 36            | 1             | 2.071331                | -0.855949 | 3.499572  |
| 37            | 1             | 2.491002                | -2.507650 | 1.530470  |
| 38            | 1             | 1.113080                | -3.338569 | 0.783905  |
| 39            | 6             | -3.347247               | -1.142131 | -2.494915 |
| 40            | 6             | -3.109901               | -3.135530 | -0.986404 |

|    |   |           |           |           |
|----|---|-----------|-----------|-----------|
| 41 | 6 | -4.907870 | -1.446701 | -0.492473 |
| 42 | 1 | -4.969810 | -1.788804 | 0.546681  |
| 43 | 1 | -5.229974 | -0.401136 | -0.529507 |
| 44 | 1 | -3.715045 | -0.121458 | -2.629830 |
| 45 | 1 | -2.302300 | -1.184554 | -2.818990 |
| 46 | 1 | -2.080020 | -3.284719 | -1.324450 |
| 47 | 1 | -3.192058 | -3.511195 | 0.039186  |
| 48 | 6 | 2.148654  | 2.809213  | 1.063516  |
| 49 | 6 | 3.887791  | 0.194341  | 1.585371  |
| 50 | 6 | 4.084994  | -1.421474 | -1.166881 |
| 51 | 6 | 2.615023  | 0.297323  | -3.412048 |
| 52 | 6 | 1.460277  | 2.934662  | -2.035320 |
| 53 | 1 | 2.996335  | 3.509908  | 1.052270  |
| 54 | 1 | 2.046649  | 2.436941  | 2.087463  |
| 55 | 1 | 1.249261  | 3.381403  | 0.819194  |
| 56 | 1 | 4.896361  | 0.631261  | 1.544973  |
| 57 | 1 | 4.006252  | -0.881460 | 1.741398  |
| 58 | 1 | 3.388236  | 0.609290  | 2.465083  |
| 59 | 1 | 5.109041  | -1.164960 | -1.474316 |
| 60 | 1 | 3.641117  | -2.038166 | -1.953273 |
| 61 | 1 | 4.155790  | -2.035463 | -0.263756 |
| 62 | 1 | 3.483186  | 0.744432  | -3.917525 |
| 63 | 1 | 1.711861  | 0.690249  | -3.889633 |
| 64 | 1 | 2.637452  | -0.780866 | -3.590856 |
| 65 | 1 | 2.231144  | 3.674071  | -2.296836 |
| 66 | 1 | 0.713532  | 3.435653  | -1.412391 |
| 67 | 1 | 0.965843  | 2.625627  | -2.960681 |
| 68 | 1 | 1.306327  | -2.206431 | 4.356653  |
| 69 | 1 | 1.652703  | -3.793273 | 2.417541  |
| 70 | 1 | -0.681663 | -3.437487 | 3.333218  |
| 71 | 1 | -3.784418 | -3.714548 | -1.628312 |
| 72 | 1 | -3.935996 | -1.796264 | -3.148650 |
| 73 | 1 | -5.608872 | -2.039220 | -1.091832 |

**TSM11-19** (E = -1199.2922563 a.u.)

| Center Number | Atomic Number | Coordinates (Angstroms) |           |           |
|---------------|---------------|-------------------------|-----------|-----------|
|               |               | X                       | Y         | Z         |
| 1             | 22            | 0.782460                | -0.103127 | -0.236785 |
| 2             | 7             | 0.447274                | -1.236705 | 1.335173  |
| 3             | 6             | -0.374672               | -0.529623 | 2.174934  |
| 4             | 7             | -1.592676               | 0.085767  | -0.564271 |
| 5             | 6             | 3.056397                | 0.413965  | 0.482429  |
| 6             | 6             | 2.328352                | 1.626298  | 0.323993  |
| 7             | 6             | 3.176490                | -0.193229 | -0.793143 |
| 8             | 17            | 0.644140                | -1.933000 | -1.878351 |
| 9             | 6             | 2.078687                | 1.817702  | -1.075965 |
| 10            | 6             | 2.576614                | 0.691051  | -1.757458 |
| 11            | 6             | 0.826494                | -2.617093 | 1.841585  |
| 12            | 6             | -2.181411               | 0.300894  | 0.567576  |
| 13            | 6             | -2.310968               | 0.115849  | -1.903556 |
| 14            | 6             | -1.498724               | 0.190784  | 1.860936  |
| 15            | 1             | -0.150638               | -0.593729 | 3.237427  |
| 16            | 6             | -2.361573               | 0.792124  | 2.893979  |
| 17            | 1             | 0.081191                | 1.350160  | 0.082771  |
| 18            | 6             | -3.599511               | 0.783886  | 0.894862  |
| 19            | 6             | -3.563379               | 1.100363  | 2.368062  |
| 20            | 1             | -3.875792               | 1.667681  | 0.322554  |
| 21            | 1             | -4.346218               | 0.012446  | 0.667830  |
| 22            | 6             | -4.780967               | 1.665499  | 3.043166  |
| 23            | 6             | -1.926702               | 0.945243  | 4.328078  |
| 24            | 1             | -2.668876               | 1.491079  | 4.917021  |
| 25            | 1             | -0.975131               | 1.488488  | 4.395426  |
| 26            | 1             | -1.776942               | -0.031364 | 4.808709  |
| 27            | 1             | -4.604524               | 1.891053  | 4.098896  |
| 28            | 1             | -5.624023               | 0.961366  | 2.987854  |

|    |   |           |           |           |
|----|---|-----------|-----------|-----------|
| 29 | 1 | -5.110263 | 2.591419  | 2.550072  |
| 30 | 6 | 2.062967  | -3.151331 | 1.101296  |
| 31 | 6 | 1.120599  | -2.642209 | 3.363919  |
| 32 | 6 | -0.384534 | -3.533696 | 1.533169  |
| 33 | 1 | -0.564480 | -3.563585 | 0.454937  |
| 34 | 1 | -1.288510 | -3.161679 | 2.029116  |
| 35 | 1 | 0.225284  | -2.484249 | 3.973745  |
| 36 | 1 | 1.872267  | -1.893206 | 3.637597  |
| 37 | 1 | 2.961004  | -2.599649 | 1.385088  |
| 38 | 1 | 1.928106  | -3.087747 | 0.021351  |
| 39 | 6 | -3.530397 | 1.070000  | -2.021425 |
| 40 | 6 | -1.299915 | 0.602611  | -2.967642 |
| 41 | 6 | -2.779245 | -1.328632 | -2.200716 |
| 42 | 1 | -1.933249 | -2.016981 | -2.183804 |
| 43 | 1 | -3.515635 | -1.652061 | -1.454775 |
| 44 | 1 | -4.411939 | 0.714606  | -1.485816 |
| 45 | 1 | -3.285659 | 2.086099  | -1.693701 |
| 46 | 1 | -1.005055 | 1.637753  | -2.760197 |
| 47 | 1 | -0.413750 | -0.029452 | -2.996931 |
| 48 | 6 | 2.094005  | 2.645803  | 1.409598  |
| 49 | 6 | 3.721233  | 0.001234  | 1.772809  |
| 50 | 6 | 4.004827  | -1.391295 | -1.175863 |
| 51 | 6 | 2.639122  | 0.485005  | -3.248192 |
| 52 | 6 | 1.480907  | 3.060075  | -1.685142 |
| 53 | 1 | 2.979702  | 3.286725  | 1.534208  |
| 54 | 1 | 1.894780  | 2.168319  | 2.374852  |
| 55 | 1 | 1.241379  | 3.290428  | 1.176611  |
| 56 | 1 | 4.454434  | 0.763396  | 2.071142  |
| 57 | 1 | 4.257955  | -0.944777 | 1.669442  |
| 58 | 1 | 3.007274  | -0.104903 | 2.596375  |
| 59 | 1 | 4.854626  | -1.077274 | -1.798419 |
| 60 | 1 | 3.416121  | -2.111507 | -1.754296 |
| 61 | 1 | 4.408956  | -1.907465 | -0.301396 |
| 62 | 1 | 3.656512  | 0.684466  | -3.615200 |
| 63 | 1 | 1.958501  | 1.155373  | -3.781855 |
| 64 | 1 | 2.379196  | -0.543506 | -3.515459 |
| 65 | 1 | 2.234279  | 3.859071  | -1.737611 |
| 66 | 1 | 0.639616  | 3.434707  | -1.092570 |
| 67 | 1 | 1.121125  | 2.881413  | -2.702648 |
| 68 | 1 | 1.518413  | -3.628987 | 3.623908  |
| 69 | 1 | 2.215043  | -4.202609 | 1.372330  |
| 70 | 1 | -0.188620 | -4.552333 | 1.889384  |
| 71 | 1 | -1.769657 | 0.574828  | -3.957376 |
| 72 | 1 | -3.801152 | 1.124413  | -3.081511 |
| 73 | 1 | -3.252357 | -1.368054 | -3.189482 |

**M19** (E = -1199.2986638 a.u.)

| Center Number | Atomic Number | Coordinates (Angstroms) |           |           |
|---------------|---------------|-------------------------|-----------|-----------|
|               |               | X                       | Y         | Z         |
| 1             | 22            | -0.814706               | -0.152079 | -0.030642 |
| 2             | 7             | 0.041899                | 1.790889  | -0.366090 |
| 3             | 6             | 1.330352                | 1.863747  | -0.081043 |
| 4             | 7             | 0.989289                | -1.178753 | -0.497778 |
| 5             | 6             | -2.362567               | 0.481013  | 1.710157  |
| 6             | 6             | -1.456735               | -0.513225 | 2.205417  |
| 7             | 6             | -3.162094               | -0.116002 | 0.701112  |
| 8             | 17            | -1.621768               | -0.047121 | -2.377284 |
| 9             | 6             | -1.717419               | -1.728291 | 1.500102  |
| 10            | 6             | -2.757605               | -1.474790 | 0.557618  |
| 11            | 6             | 2.098288                | -0.558891 | -0.071655 |
| 12            | 6             | 2.228067                | 0.826667  | 0.221705  |
| 13            | 1             | 1.798245                | 2.843426  | -0.129500 |
| 14            | 6             | 3.608634                | 1.102425  | 0.675471  |
| 15            | 1             | 0.190130                | 0.194871  | 1.200853  |
| 16            | 6             | 3.480496                | -1.169611 | 0.173719  |



|    |   |           |           |           |
|----|---|-----------|-----------|-----------|
| 17 | 6 | 4.334379  | -0.032208 | 0.665120  |
| 18 | 1 | 3.412095  | -1.971669 | 0.914713  |
| 19 | 1 | 3.910422  | -1.614759 | -0.727917 |
| 20 | 6 | 5.773522  | -0.258348 | 1.037757  |
| 21 | 6 | 4.073675  | 2.478986  | 1.076919  |
| 22 | 1 | 5.088286  | 2.455770  | 1.484895  |
| 23 | 1 | 3.412672  | 2.913858  | 1.838508  |
| 24 | 1 | 4.079690  | 3.169043  | 0.221697  |
| 25 | 1 | 6.251669  | 0.655127  | 1.404776  |
| 26 | 1 | 6.357334  | -0.614963 | 0.176333  |
| 27 | 1 | 5.867500  | -1.023378 | 1.822204  |
| 28 | 6 | -0.660781 | -0.403978 | 3.482696  |
| 29 | 6 | -2.533997 | 1.835924  | 2.353526  |
| 30 | 6 | -4.324279 | 0.491535  | -0.039647 |
| 31 | 6 | -3.466576 | -2.463722 | -0.331779 |
| 32 | 6 | -1.149989 | -3.065837 | 1.914707  |
| 33 | 1 | -1.287674 | -0.688056 | 4.341285  |
| 34 | 1 | -0.303916 | 0.616530  | 3.648232  |
| 35 | 1 | 0.211442  | -1.064072 | 3.471076  |
| 36 | 1 | -2.828076 | 1.713343  | 3.405072  |
| 37 | 1 | -3.315848 | 2.422210  | 1.864171  |
| 38 | 1 | -1.609326 | 2.423159  | 2.339596  |
| 39 | 1 | -5.258234 | -0.005202 | 0.258576  |
| 40 | 1 | -4.211878 | 0.367914  | -1.121991 |
| 41 | 1 | -4.433339 | 1.558178  | 0.170831  |
| 42 | 1 | -4.510662 | -2.578156 | -0.008544 |
| 43 | 1 | -3.001666 | -3.452187 | -0.300449 |
| 44 | 1 | -3.475985 | -2.125223 | -1.373675 |
| 45 | 1 | -1.506260 | -3.321280 | 2.922629  |
| 46 | 1 | -0.055695 | -3.063080 | 1.946636  |
| 47 | 1 | -1.466308 | -3.871056 | 1.246903  |
| 48 | 6 | -0.519647 | 3.082650  | -0.966865 |
| 49 | 6 | -0.130396 | 4.317710  | -0.108490 |
| 50 | 6 | 0.040129  | 3.230462  | -2.401991 |
| 51 | 6 | -2.056214 | 3.037968  | -1.023473 |
| 52 | 1 | -0.403037 | 4.162030  | 0.941332  |
| 53 | 1 | 0.934546  | 4.564128  | -0.157689 |
| 54 | 1 | 1.133911  | 3.303168  | -2.392421 |
| 55 | 1 | -0.245878 | 2.365475  | -3.006100 |
| 56 | 1 | -2.407467 | 2.179066  | -1.593455 |
| 57 | 1 | -2.482552 | 3.007205  | -0.019015 |
| 58 | 6 | 1.132469  | -2.466916 | -1.311728 |
| 59 | 6 | -0.262324 | -3.062619 | -1.591211 |
| 60 | 6 | 1.777908  | -2.101196 | -2.670953 |
| 61 | 6 | 1.936571  | -3.589491 | -0.592315 |
| 62 | 1 | -0.725391 | -3.417658 | -0.669430 |
| 63 | 1 | -0.921036 | -2.345017 | -2.077550 |
| 64 | 1 | 1.143862  | -1.382825 | -3.199243 |
| 65 | 1 | 2.771425  | -1.658743 | -2.548399 |
| 66 | 1 | 3.017299  | -3.472281 | -0.670814 |
| 67 | 1 | 1.664261  | -3.651068 | 0.466600  |
| 68 | 1 | 1.683847  | -4.549122 | -1.056604 |
| 69 | 1 | 1.880638  | -3.000098 | -3.290479 |
| 70 | 1 | -0.148989 | -3.925023 | -2.257843 |
| 71 | 1 | -0.678636 | 5.191275  | -0.477477 |
| 72 | 1 | -2.420289 | 3.949023  | -1.512299 |
| 73 | 1 | -0.359059 | 4.138172  | -2.870242 |

TSM19-20 (E = -1199.2840759 a.u.)

| Center Number | Atomic Number | Coordinates (Angstroms) |   |   |
|---------------|---------------|-------------------------|---|---|
|               |               | X                       | Y | Z |

|    |    |           |           |           |
|----|----|-----------|-----------|-----------|
| 1  | 22 | 0.743107  | 0.259274  | 0.077380  |
| 2  | 7  | 0.053413  | 0.103031  | -1.677478 |
| 3  | 6  | -0.987783 | -0.811591 | -1.436783 |
| 4  | 7  | -1.230972 | 0.770465  | 0.995681  |
| 5  | 6  | 2.616337  | -1.151383 | -0.360804 |
| 6  | 6  | 1.902053  | -1.728391 | 0.732110  |
| 7  | 6  | 3.158902  | 0.085392  | 0.078087  |
| 8  | 17 | 1.073924  | 2.705547  | -0.093374 |
| 9  | 6  | 2.071673  | -0.873350 | 1.870853  |
| 10 | 6  | 2.833757  | 0.243970  | 1.466343  |
| 11 | 6  | -2.282726 | 0.429173  | 0.274815  |
| 12 | 6  | -2.189258 | -0.468253 | -0.837420 |
| 13 | 1  | -0.966695 | -1.734297 | -2.020349 |
| 14 | 6  | -3.506954 | -1.063033 | -1.085374 |
| 15 | 1  | -0.204053 | -1.143339 | 0.251284  |
| 16 | 6  | -3.779251 | 0.645545  | 0.503238  |
| 17 | 6  | -4.438190 | -0.411615 | -0.353252 |
| 18 | 1  | -4.096299 | 0.586220  | 1.542164  |
| 19 | 1  | -4.062957 | 1.645193  | 0.148663  |
| 20 | 6  | -5.933091 | -0.562472 | -0.362372 |
| 21 | 6  | -3.722381 | -2.169136 | -2.084608 |
| 22 | 1  | -4.776811 | -2.450293 | -2.155700 |
| 23 | 1  | -3.155622 | -3.068125 | -1.807678 |
| 24 | 1  | -3.383740 | -1.869961 | -3.085745 |
| 25 | 1  | -6.264334 | -1.344155 | -1.052655 |
| 26 | 1  | -6.423373 | 0.376284  | -0.659352 |
| 27 | 1  | -6.314014 | -0.815393 | 0.637536  |
| 28 | 6  | 1.384348  | -3.145285 | 0.784443  |
| 29 | 6  | 2.890930  | -1.866611 | -1.660716 |
| 30 | 6  | 4.099301  | 0.995866  | -0.668489 |
| 31 | 6  | 3.350250  | 1.373091  | 2.319081  |
| 32 | 6  | 1.645904  | -1.255592 | 3.267817  |
| 33 | 1  | 2.191852  | -3.832886 | 1.078048  |
| 34 | 1  | 1.006785  | -3.473589 | -0.188778 |
| 35 | 1  | 0.572337  | -3.253127 | 1.510011  |
| 36 | 1  | 3.592030  | -2.696292 | -1.490812 |
| 37 | 1  | 3.342388  | -1.203827 | -2.402624 |
| 38 | 1  | 1.981367  | -2.289526 | -2.099119 |
| 39 | 1  | 5.110359  | 0.928031  | -0.241631 |
| 40 | 1  | 3.775110  | 2.039607  | -0.601732 |
| 41 | 1  | 4.168991  | 0.731504  | -1.726730 |
| 42 | 1  | 4.447047  | 1.332152  | 2.375425  |
| 43 | 1  | 2.964734  | 1.325957  | 3.341425  |
| 44 | 1  | 3.074963  | 2.345041  | 1.894535  |
| 45 | 1  | 2.200789  | -2.145232 | 3.597218  |
| 46 | 1  | 0.579244  | -1.501842 | 3.325362  |
| 47 | 1  | 1.848094  | -0.460762 | 3.991023  |
| 48 | 6  | 0.172914  | 0.626500  | -3.088283 |
| 49 | 6  | -0.022435 | -0.500062 | -4.132565 |
| 50 | 6  | -0.916113 | 1.710933  | -3.277616 |
| 51 | 6  | 1.561580  | 1.257954  | -3.289973 |
| 52 | 1  | 0.677529  | -1.325138 | -3.958715 |
| 53 | 1  | -1.042844 | -0.897610 | -4.127116 |
| 54 | 1  | -1.915833 | 1.295072  | -3.112906 |
| 55 | 1  | -0.756363 | 2.528267  | -2.568882 |
| 56 | 1  | 1.758622  | 2.009309  | -2.523503 |
| 57 | 1  | 2.346245  | 0.497544  | -3.255911 |
| 58 | 6  | -1.448889 | 1.494026  | 2.323209  |
| 59 | 6  | -0.089660 | 1.905695  | 2.921455  |
| 60 | 6  | -2.270141 | 2.795378  | 2.144422  |
| 61 | 6  | -2.101794 | 0.518245  | 3.339328  |
| 62 | 1  | 0.581092  | 1.049518  | 2.988789  |
| 63 | 1  | 0.391361  | 2.679860  | 2.325322  |
| 64 | 1  | -1.843922 | 3.389933  | 1.330164  |

|    |   |           |           |           |
|----|---|-----------|-----------|-----------|
| 65 | 1 | -3.327607 | 2.622441  | 1.941668  |
| 66 | 1 | -3.074030 | 0.139367  | 3.021775  |
| 67 | 1 | -1.444947 | -0.341918 | 3.504800  |
| 68 | 1 | -2.238604 | 1.032619  | 4.297437  |
| 69 | 1 | -2.205623 | 3.385203  | 3.065771  |
| 70 | 1 | -0.250170 | 2.286157  | 3.936723  |
| 71 | 1 | 0.169532  | -0.096975 | -5.132904 |
| 72 | 1 | 1.600363  | 1.739763  | -4.273907 |
| 73 | 1 | -0.872264 | 2.111012  | -4.298058 |

**M20** (E = -1199.3265871 a.u.)

| Center Number | Atomic Number | Coordinates (Angstroms) |           |           |
|---------------|---------------|-------------------------|-----------|-----------|
|               |               | X                       | Y         | Z         |
| 1             | 22            | 0.812927                | -0.024518 | -0.156309 |
| 2             | 7             | -0.246723               | -1.547044 | -0.221232 |
| 3             | 6             | -1.040663               | -1.160524 | 0.972984  |
| 4             | 7             | -0.696967               | 1.368125  | -0.238737 |
| 5             | 6             | 2.400436                | -1.198069 | 1.263240  |
| 6             | 6             | 1.957369                | -0.054312 | 1.996186  |
| 7             | 6             | 3.154942                | -0.733329 | 0.159010  |
| 8             | 17            | 1.355821                | 0.091064  | -2.456270 |
| 9             | 6             | 2.516483                | 1.113057  | 1.384276  |
| 10            | 6             | 3.236312                | 0.698614  | 0.243281  |
| 11            | 6             | -0.650547               | -2.745780 | -1.019656 |
| 12            | 6             | -1.972075               | 0.903554  | 0.053918  |
| 13            | 6             | -0.568872               | 2.825399  | -0.658283 |
| 14            | 6             | -2.208590               | -0.304920 | 0.658827  |
| 15            | 1             | -1.246660               | -2.018909 | 1.614605  |
| 16            | 6             | -3.640528               | -0.526912 | 0.867293  |
| 17            | 1             | -0.365902               | -0.523304 | 1.592223  |
| 18            | 6             | -3.345780               | 1.504449  | -0.241445 |
| 19            | 6             | -4.326001               | 0.525541  | 0.361220  |
| 20            | 1             | -3.495471               | 2.513890  | 0.147250  |
| 21            | 1             | -3.504600               | 1.559951  | -1.323453 |
| 22            | 6             | -5.807277               | 0.784070  | 0.331946  |
| 23            | 6             | -4.200383               | -1.739530 | 1.567201  |
| 24            | 1             | -5.277507               | -1.644914 | 1.734558  |
| 25            | 1             | -3.723264               | -1.889245 | 2.545305  |
| 26            | 1             | -4.036643               | -2.655732 | 0.984575  |
| 27            | 1             | -6.370702               | -0.022100 | 0.813325  |
| 28            | 1             | -6.180682               | 0.876884  | -0.698627 |
| 29            | 1             | -6.063935               | 1.721812  | 0.846790  |
| 30            | 6             | 0.579112                | -3.269680 | -1.792359 |
| 31            | 6             | -1.171841               | -3.887488 | -0.113379 |
| 32            | 6             | -1.751486               | -2.332503 | -2.029934 |
| 33            | 1             | -1.372946               | -1.552243 | -2.696530 |
| 34            | 1             | -2.636585               | -1.948385 | -1.513645 |
| 35            | 1             | -2.112187               | -3.628777 | 0.382039  |
| 36            | 1             | -0.432071               | -4.153761 | 0.650106  |
| 37            | 1             | 1.347480                | -3.629763 | -1.100852 |
| 38            | 1             | 1.009608                | -2.487575 | -2.419188 |
| 39            | 6             | -0.980799               | 3.755249  | 0.512587  |
| 40            | 6             | 0.897535                | 3.149047  | -1.012522 |
| 41            | 6             | -1.393521               | 3.140024  | -1.938477 |
| 42            | 1             | -1.270785               | 2.336437  | -2.671870 |
| 43            | 1             | -2.456173               | 3.286450  | -1.744249 |
| 44            | 1             | -2.002087               | 3.575407  | 0.854276  |
| 45            | 1             | -0.310774               | 3.609002  | 1.365924  |
| 46            | 1             | 1.570433                | 2.882711  | -0.201077 |
| 47            | 1             | 1.213507                | 2.626784  | -1.916304 |
| 48            | 6             | 1.318815                | -0.066663 | 3.366647  |
| 49            | 6             | 2.233659                | -2.629601 | 1.707454  |
| 50            | 6             | 3.921511                | -1.565463 | -0.835907 |
| 51            | 6             | 4.069134                | 1.545188  | -0.682767 |
| 52            | 6             | 2.521638                | 2.471097  | 2.044468  |

|    |   |           |           |           |
|----|---|-----------|-----------|-----------|
| 53 | 1 | 2.089633  | 0.065150  | 4.140403  |
| 54 | 1 | 0.810536  | -1.013198 | 3.575172  |
| 55 | 1 | 0.591726  | 0.743525  | 3.493238  |
| 56 | 1 | 2.967048  | -2.870053 | 2.490520  |
| 57 | 1 | 2.390013  | -3.330100 | 0.883406  |
| 58 | 1 | 1.238525  | -2.821740 | 2.120509  |
| 59 | 1 | 4.994923  | -1.551129 | -0.597033 |
| 60 | 1 | 3.799096  | -1.181268 | -1.853562 |
| 61 | 1 | 3.595340  | -2.609190 | -0.831252 |
| 62 | 1 | 5.130239  | 1.272251  | -0.598613 |
| 63 | 1 | 3.982212  | 2.611023  | -0.453196 |
| 64 | 1 | 3.772100  | 1.397992  | -1.727716 |
| 65 | 1 | 3.114376  | 2.427911  | 2.969513  |
| 66 | 1 | 1.517396  | 2.808735  | 2.321658  |
| 67 | 1 | 2.970752  | 3.238722  | 1.408541  |
| 68 | 1 | -1.357714 | -4.774647 | -0.728318 |
| 69 | 1 | 0.276428  | -4.106882 | -2.431857 |
| 70 | 1 | -2.049007 | -3.198619 | -2.634135 |
| 71 | 1 | 0.990350  | 4.227520  | -1.184250 |
| 72 | 1 | -0.909326 | 4.803249  | 0.197513  |
| 73 | 1 | -1.015738 | 4.066779  | -2.385409 |

**TSM20-21** (E = -1199.3016712 a.u.)

| Center Number | Atomic Number | Coordinates (Angstroms) |           |           |
|---------------|---------------|-------------------------|-----------|-----------|
|               |               | X                       | Y         | Z         |
| 1             | 22            | 0.382438                | -0.202737 | -0.107557 |
| 2             | 7             | 0.406673                | -0.338286 | 1.626492  |
| 3             | 6             | -0.362907               | 1.581627  | 1.551450  |
| 4             | 7             | -1.772112               | 0.326977  | -0.553973 |
| 5             | 6             | 2.689589                | 0.518506  | -0.154611 |
| 6             | 6             | 1.960665                | 1.525931  | -0.850947 |
| 7             | 6             | 2.637380                | -0.663850 | -0.933360 |
| 8             | 17            | 0.011191                | -2.543285 | -0.493495 |
| 9             | 6             | 1.530368                | 0.983323  | -2.105973 |
| 10            | 6             | 1.940157                | -0.364593 | -2.155155 |
| 11            | 6             | 0.481833                | -0.948955 | 2.961332  |
| 12            | 6             | -2.414883               | 0.990328  | 0.397767  |
| 13            | 6             | -2.564080               | -0.197598 | -1.749991 |
| 14            | 6             | -1.748242               | 1.542267  | 1.526865  |
| 15            | 1             | 0.186027                | 1.979683  | 2.391993  |
| 16            | 6             | -2.727875               | 1.921982  | 2.548156  |
| 17            | 1             | 0.109489                | 1.837423  | 0.600751  |
| 18            | 6             | -3.906466               | 1.228658  | 0.638340  |
| 19            | 6             | -3.975325               | 1.747241  | 2.057708  |
| 20            | 1             | -4.292869               | 1.991273  | -0.045611 |
| 21            | 1             | -4.515032               | 0.335278  | 0.487722  |
| 22            | 6             | -5.302080               | 2.061779  | 2.689579  |
| 23            | 6             | -2.330937               | 2.493070  | 3.883815  |
| 24            | 1             | -3.202238               | 2.803375  | 4.467420  |
| 25            | 1             | -1.681403               | 3.370118  | 3.756106  |
| 26            | 1             | -1.772399               | 1.762696  | 4.483199  |
| 27            | 1             | -5.190634               | 2.460833  | 3.702495  |
| 28            | 1             | -5.934353               | 1.164367  | 2.753229  |
| 29            | 1             | -5.861520               | 2.801409  | 2.097745  |
| 30            | 6             | 1.409832                | -2.187835 | 2.859326  |
| 31            | 6             | 1.058342                | 0.015588  | 4.027386  |
| 32            | 6             | -0.937936               | -1.414614 | 3.376323  |
| 33            | 1             | -1.321731               | -2.133379 | 2.646133  |
| 34            | 1             | -1.630627               | -0.569340 | 3.424704  |
| 35            | 1             | 0.385828                | 0.857240  | 4.219245  |
| 36            | 1             | 2.031106                | 0.406641  | 3.713049  |
| 37            | 1             | 2.435970                | -1.885276 | 2.627062  |
| 38            | 1             | 1.059472                | -2.863021 | 2.075629  |
| 39            | 6             | -3.530434               | 0.859876  | -2.350275 |
| 40            | 6             | -1.582912               | -0.572463 | -2.876965 |

|    |   |           |           |           |
|----|---|-----------|-----------|-----------|
| 41 | 6 | -3.332339 | -1.476840 | -1.333342 |
| 42 | 1 | -2.630773 | -2.238644 | -0.985507 |
| 43 | 1 | -4.057818 | -1.284862 | -0.538705 |
| 44 | 1 | -4.465132 | 0.957217  | -1.796849 |
| 45 | 1 | -3.047108 | 1.842453  | -2.405622 |
| 46 | 1 | -1.090753 | 0.316960  | -3.272173 |
| 47 | 1 | -0.834785 | -1.286505 | -2.536517 |
| 48 | 6 | 1.934408  | 2.999217  | -0.511356 |
| 49 | 6 | 3.514287  | 0.740324  | 1.087602  |
| 50 | 6 | 3.377412  | -1.950206 | -0.669221 |
| 51 | 6 | 1.818297  | -1.328821 | -3.305045 |
| 52 | 6 | 0.951569  | 1.824524  | -3.218218 |
| 53 | 1 | 2.737550  | 3.523426  | -1.050119 |
| 54 | 1 | 2.092321  | 3.179090  | 0.556788  |
| 55 | 1 | 0.990356  | 3.477091  | -0.798878 |
| 56 | 1 | 4.504736  | 1.135576  | 0.818645  |
| 57 | 1 | 3.669024  | -0.188091 | 1.643267  |
| 58 | 1 | 3.046393  | 1.459326  | 1.767028  |
| 59 | 1 | 4.309242  | -1.981898 | -1.253264 |
| 60 | 1 | 2.773914  | -2.819525 | -0.945986 |
| 61 | 1 | 3.644310  | -2.054803 | 0.386523  |
| 62 | 1 | 2.812213  | -1.570828 | -3.706969 |
| 63 | 1 | 1.220035  | -0.917350 | -4.123058 |
| 64 | 1 | 1.355746  | -2.270016 | -2.984684 |
| 65 | 1 | 1.673206  | 2.598956  | -3.514821 |
| 66 | 1 | 0.029864  | 2.340540  | -2.923234 |
| 67 | 1 | 0.732709  | 1.227326  | -4.107432 |
| 68 | 1 | 1.194603  | -0.522216 | 4.972772  |
| 69 | 1 | 1.415852  | -2.721851 | 3.817387  |
| 70 | 1 | -0.904450 | -1.895815 | 4.361711  |
| 71 | 1 | -2.143724 | -1.039397 | -3.694717 |
| 72 | 1 | -3.792536 | 0.558004  | -3.370167 |
| 73 | 1 | -3.878277 | -1.871147 | -2.198884 |

**M21** (E = -1199.3190574 a.u.)

| Center Number | Atomic Number | Coordinates (Angstroms) |           |           |
|---------------|---------------|-------------------------|-----------|-----------|
|               |               | X                       | Y         | Z         |
| 1             | 22            | 0.844799                | -0.529151 | -0.303692 |
| 2             | 7             | 0.741679                | -0.588946 | 1.373608  |
| 3             | 6             | -0.442598               | 2.475965  | 0.876663  |
| 4             | 7             | -1.573575               | 0.220721  | -0.790205 |
| 5             | 6             | 3.185780                | -0.087931 | -0.392830 |
| 6             | 6             | 2.526288                | 1.137074  | -0.708298 |
| 7             | 6             | 2.997077                | -0.976843 | -1.483583 |
| 8             | 17            | 0.501698                | -2.856162 | -0.724055 |
| 9             | 6             | 1.939377                | 0.998397  | -2.007421 |
| 10            | 6             | 2.233186                | -0.305835 | -2.483429 |
| 11            | 6             | 0.732252                | -0.899696 | 2.797089  |
| 12            | 6             | -2.227041               | 0.913071  | 0.074330  |
| 13            | 6             | -2.328764               | -0.539836 | -1.884513 |
| 14            | 6             | -1.615476               | 1.858030  | 1.050173  |
| 15            | 1             | -0.057250               | 3.191492  | 1.592148  |
| 16            | 6             | -2.596752               | 2.097000  | 2.118726  |
| 17            | 1             | 0.156641                | 2.282520  | 0.001369  |
| 18            | 6             | -3.722517               | 0.925140  | 0.406023  |
| 19            | 6             | -3.783289               | 1.555159  | 1.778460  |
| 20            | 1             | -4.275121               | 1.550225  | -0.303379 |
| 21            | 1             | -4.172068               | -0.067823 | 0.373970  |
| 22            | 6             | -5.080800               | 1.570167  | 2.532524  |
| 23            | 6             | -2.258315               | 2.899739  | 3.344746  |
| 24            | 1             | -3.095185               | 2.945687  | 4.046515  |
| 25            | 1             | -1.989724               | 3.930084  | 3.074147  |
| 26            | 1             | -1.397047               | 2.469772  | 3.870917  |
| 27            | 1             | -4.992936               | 2.065513  | 3.503189  |
| 28            | 1             | -5.440021               | 0.545953  | 2.705255  |

|    |   |           |           |           |
|----|---|-----------|-----------|-----------|
| 29 | 1 | -5.862193 | 2.086505  | 1.956857  |
| 30 | 6 | 1.624385  | -2.140604 | 3.056526  |
| 31 | 6 | 1.253257  | 0.305917  | 3.617217  |
| 32 | 6 | -0.725410 | -1.229119 | 3.213772  |
| 33 | 1 | -1.094589 | -2.081123 | 2.633411  |
| 34 | 1 | -1.382397 | -0.372736 | 3.030366  |
| 35 | 1 | 0.640887  | 1.192114  | 3.422512  |
| 36 | 1 | 2.289194  | 0.537130  | 3.347490  |
| 37 | 1 | 2.665312  | -1.928749 | 2.793781  |
| 38 | 1 | 1.279642  | -2.983858 | 2.450701  |
| 39 | 6 | -3.471295 | 0.297619  | -2.520351 |
| 40 | 6 | -1.311433 | -0.813323 | -3.007676 |
| 41 | 6 | -2.871530 | -1.881780 | -1.340781 |
| 42 | 1 | -2.061575 | -2.487057 | -0.929362 |
| 43 | 1 | -3.629605 | -1.735895 | -0.566206 |
| 44 | 1 | -4.392192 | 0.291190  | -1.935780 |
| 45 | 1 | -3.157094 | 1.335677  | -2.680326 |
| 46 | 1 | -0.937414 | 0.128389  | -3.420448 |
| 47 | 1 | -0.473948 | -1.411880 | -2.650036 |
| 48 | 6 | 2.747982  | 2.431542  | 0.041933  |
| 49 | 6 | 4.127511  | -0.294954 | 0.766555  |
| 50 | 6 | 3.642124  | -2.327715 | -1.651754 |
| 51 | 6 | 1.957081  | -0.875517 | -3.852714 |
| 52 | 6 | 1.282041  | 2.111514  | -2.790527 |
| 53 | 1 | 3.795399  | 2.749110  | -0.066667 |
| 54 | 1 | 2.544524  | 2.334172  | 1.113444  |
| 55 | 1 | 2.125775  | 3.243312  | -0.347036 |
| 56 | 1 | 5.137213  | 0.057419  | 0.506553  |
| 57 | 1 | 4.207938  | -1.351085 | 1.040487  |
| 58 | 1 | 3.802250  | 0.255923  | 1.653381  |
| 59 | 1 | 4.584566  | -2.228831 | -2.211329 |
| 60 | 1 | 2.993998  | -3.018436 | -2.197738 |
| 61 | 1 | 3.873251  | -2.789495 | -0.687506 |
| 62 | 1 | 2.889203  | -0.940568 | -4.432222 |
| 63 | 1 | 1.260510  | -0.255978 | -4.424390 |
| 64 | 1 | 1.540857  | -1.888351 | -3.797309 |
| 65 | 1 | 2.041728  | 2.789008  | -3.206608 |
| 66 | 1 | 0.609891  | 2.719818  | -2.174861 |
| 67 | 1 | 0.696905  | 1.724789  | -3.629992 |
| 68 | 1 | 1.218666  | 0.084399  | 4.691321  |
| 69 | 1 | 1.584175  | -2.423722 | 4.115993  |
| 70 | 1 | -0.771215 | -1.483717 | 4.280276  |
| 71 | 1 | -1.798142 | -1.372430 | -3.814392 |
| 72 | 1 | -3.711918 | -0.132144 | -3.498249 |
| 73 | 1 | -3.336441 | -2.438233 | -2.163125 |

**M15** (E = -675.8599464 a.u.)

| Center Number | Atomic Number | Coordinates (Angstroms) |           |           |
|---------------|---------------|-------------------------|-----------|-----------|
|               |               | X                       | Y         | Z         |
| 1             | 22            | -0.034526               | 0.539374  | -0.204746 |
| 2             | 7             | 1.641083                | 0.343435  | -0.144968 |
| 3             | 6             | -0.774656               | -1.363046 | 0.929390  |
| 4             | 6             | -0.813250               | -1.651525 | -0.466362 |
| 5             | 6             | -1.756801               | -0.356883 | 1.192998  |
| 6             | 17            | -0.602186               | 2.770382  | -0.617693 |
| 7             | 6             | -1.825089               | -0.827349 | -1.055563 |
| 8             | 6             | -2.421993               | -0.043876 | -0.028340 |
| 9             | 6             | 3.085174                | 0.179514  | -0.066015 |
| 10            | 6             | 3.550715                | 0.579561  | 1.356845  |
| 11            | 6             | 3.473970                | -1.290149 | -0.356052 |
| 12            | 6             | 3.740810                | 1.112774  | -1.115401 |
| 13            | 1             | 3.458692                | 2.153393  | -0.926475 |
| 14            | 1             | 3.410247                | 0.843159  | -2.124596 |
| 15            | 1             | 3.128327                | -1.587810 | -1.351907 |
| 16            | 1             | 3.025339                | -1.961366 | 0.384070  |

|    |   |           |           |           |
|----|---|-----------|-----------|-----------|
| 17 | 1 | 3.085950  | -0.068883 | 2.107908  |
| 18 | 1 | 3.271041  | 1.616768  | 1.569776  |
| 19 | 6 | -0.057970 | -2.754154 | -1.168945 |
| 20 | 6 | 0.030615  | -2.102469 | 1.970521  |
| 21 | 6 | -2.091362 | 0.216410  | 2.549770  |
| 22 | 6 | -3.577841 | 0.908048  | -0.191520 |
| 23 | 6 | -2.237467 | -0.840406 | -2.508406 |
| 24 | 1 | -0.654810 | -3.677260 | -1.182298 |
| 25 | 1 | 0.888236  | -2.975678 | -0.669000 |
| 26 | 1 | 0.170041  | -2.497111 | -2.208671 |
| 27 | 1 | -0.550969 | -2.940608 | 2.380071  |
| 28 | 1 | 0.308434  | -1.455350 | 2.808838  |
| 29 | 1 | 0.952839  | -2.511664 | 1.549345  |
| 30 | 1 | -2.897272 | -0.362527 | 3.022459  |
| 31 | 1 | -2.431517 | 1.254766  | 2.480244  |
| 32 | 1 | -1.231592 | 0.188581  | 3.227333  |
| 33 | 1 | -4.532787 | 0.385298  | -0.039601 |
| 34 | 1 | -3.596479 | 1.352746  | -1.190878 |
| 35 | 1 | -3.529194 | 1.729868  | 0.528965  |
| 36 | 1 | -3.055428 | -1.556911 | -2.668541 |
| 37 | 1 | -1.412771 | -1.139206 | -3.163911 |
| 38 | 1 | -2.592683 | 0.140907  | -2.839553 |
| 39 | 1 | 4.563065  | -1.413083 | -0.316356 |
| 40 | 1 | 4.640012  | 0.486567  | 1.444292  |
| 41 | 1 | 4.833736  | 1.029967  | -1.073226 |

**M16** (E = -523.4597698 a.u.)

| Center Number | Atomic Number | Coordinates (Angstroms) |           |           |
|---------------|---------------|-------------------------|-----------|-----------|
|               |               | X                       | Y         | Z         |
| 1             | 7             | 1.249944                | 0.738935  | -0.017703 |
| 2             | 6             | 0.070473                | 0.274765  | -0.070148 |
| 3             | 6             | 2.501607                | -0.067052 | 0.020534  |
| 4             | 6             | -1.127978               | 1.181243  | -0.049075 |
| 5             | 6             | -2.323176               | 0.328718  | 0.010750  |
| 6             | 6             | -0.478240               | -1.155528 | -0.117870 |
| 7             | 6             | -1.975106               | -0.976150 | -0.013793 |
| 8             | 1             | -0.210180               | -1.654518 | -1.055488 |
| 9             | 1             | -0.079703               | -1.778334 | 0.690652  |
| 10            | 6             | -2.866066               | -2.184722 | 0.027941  |
| 11            | 6             | -3.707422               | 0.914992  | 0.083805  |
| 12            | 1             | -4.480652               | 0.143725  | 0.132924  |
| 13            | 1             | -3.910739               | 1.542681  | -0.794187 |
| 14            | 1             | -3.811879               | 1.557105  | 0.968499  |
| 15            | 1             | -3.925765               | -1.923675 | 0.095265  |
| 16            | 1             | -2.617664               | -2.820344 | 0.889844  |
| 17            | 1             | -2.725082               | -2.802635 | -0.870464 |
| 18            | 6             | 2.546967                | -1.236391 | -0.992979 |
| 19            | 6             | 3.635696                | 0.926022  | -0.323660 |
| 20            | 6             | 2.701178                | -0.587861 | 1.464660  |
| 21            | 1             | 2.685326                | 0.244941  | 2.175696  |
| 22            | 1             | 1.914588                | -1.296367 | 1.746283  |
| 23            | 1             | 1.910929                | -2.074465 | -0.696933 |
| 24            | 1             | 2.240674                | -0.897262 | -1.989511 |
| 25            | 1             | 3.509011                | 1.311162  | -1.341911 |
| 26            | 1             | 3.615120                | 1.775835  | 0.365835  |
| 27            | 1             | 4.614581                | 0.437585  | -0.254896 |
| 28            | 1             | 3.573488                | -1.613115 | -1.066715 |
| 29            | 1             | 3.667690                | -1.097710 | 1.550596  |
| 30            | 6             | -1.080383               | 2.521162  | -0.080026 |
| 31            | 1             | -1.979288               | 3.125799  | -0.059313 |
| 32            | 1             | -0.125980               | 3.031197  | -0.126254 |

**M22** (E = -924.1538813 a.u.)

| Center Number | Atomic Number | Coordinates (Angstroms) |   |   |
|---------------|---------------|-------------------------|---|---|
|               |               | X                       | Y | Z |

|    |    |           |           |           |
|----|----|-----------|-----------|-----------|
| 1  | 22 | -0.292612 | -0.075288 | -0.377424 |
| 2  | 7  | -0.824011 | 1.524750  | -0.237695 |
| 3  | 6  | -1.895595 | -1.063152 | 1.053921  |
| 4  | 6  | -0.654983 | -1.037711 | 1.756564  |
| 5  | 6  | -1.761137 | -1.980210 | -0.026827 |
| 6  | 17 | -0.203662 | -0.537238 | -2.704592 |
| 7  | 6  | 0.221420  | -1.986776 | 1.136853  |
| 8  | 6  | -0.458436 | -2.562708 | 0.035824  |
| 9  | 6  | -1.357265 | 2.877892  | -0.206771 |
| 10 | 6  | -2.766621 | 2.886902  | -0.850996 |
| 11 | 6  | -1.442503 | 3.389279  | 1.253204  |
| 12 | 6  | -0.410120 | 3.794246  | -1.024840 |
| 13 | 1  | -0.334134 | 3.431375  | -2.054674 |
| 14 | 1  | 0.593838  | 3.796740  | -0.585457 |
| 15 | 1  | -0.451159 | 3.380078  | 1.721183  |
| 16 | 1  | -2.110098 | 2.754542  | 1.845510  |
| 17 | 1  | -3.449679 | 2.243448  | -0.286514 |
| 18 | 1  | -2.711583 | 2.516165  | -1.879694 |
| 19 | 6  | -0.390429 | -0.313227 | 3.055779  |
| 20 | 6  | -3.171134 | -0.378918 | 1.479287  |
| 21 | 6  | -2.841688 | -2.376996 | -1.002092 |
| 22 | 6  | 0.050780  | -3.636941 | -0.891248 |
| 23 | 6  | 1.581586  | -2.385025 | 1.654812  |
| 24 | 1  | -0.676538 | -0.935996 | 3.916082  |
| 25 | 1  | -0.959381 | 0.619503  | 3.119024  |
| 26 | 1  | 0.670039  | -0.064833 | 3.176846  |
| 27 | 1  | -3.744540 | -1.026479 | 2.158871  |
| 28 | 1  | -3.813445 | -0.148250 | 0.623764  |
| 29 | 1  | -2.970498 | 0.559115  | 2.004355  |
| 30 | 1  | -3.369269 | -3.275024 | -0.648103 |
| 31 | 1  | -2.425735 | -2.599152 | -1.989356 |
| 32 | 1  | -3.586691 | -1.584754 | -1.127282 |
| 33 | 1  | -0.463571 | -4.590611 | -0.706576 |
| 34 | 1  | 1.123223  | -3.812183 | -0.755991 |
| 35 | 1  | -0.114900 | -3.366844 | -1.940527 |
| 36 | 1  | 1.486823  | -3.172423 | 2.416043  |
| 37 | 1  | 2.105121  | -1.544071 | 2.121892  |
| 38 | 1  | 2.224721  | -2.776341 | 0.859792  |
| 39 | 1  | -1.827021 | 4.416493  | 1.282574  |
| 40 | 1  | -3.178794 | 3.903839  | -0.865285 |
| 41 | 1  | -0.786249 | 4.825041  | -1.039428 |
| 42 | 7  | 1.871238  | 0.314209  | -0.130313 |
| 43 | 6  | 2.783213  | -0.292240 | -0.925864 |
| 44 | 6  | 2.313891  | 1.203477  | 0.789573  |
| 45 | 6  | 4.151835  | -0.037508 | -0.826635 |
| 46 | 1  | 2.388254  | -0.977989 | -1.665401 |
| 47 | 6  | 3.665980  | 1.503358  | 0.954261  |
| 48 | 1  | 1.550945  | 1.686446  | 1.386515  |
| 49 | 6  | 4.605938  | 0.873421  | 0.131642  |
| 50 | 1  | 4.840460  | -0.543394 | -1.492475 |
| 51 | 1  | 3.969171  | 2.222760  | 1.705444  |
| 52 | 1  | 5.663396  | 1.091382  | 0.231492  |

$1^{\text{Me}}$  (E = -830.6734761 a.u.)

| Center Number | Atomic Number | Coordinates (Angstroms) |           |           |
|---------------|---------------|-------------------------|-----------|-----------|
|               |               | X                       | Y         | Z         |
| 1             | 22            | -0.001867               | 0.332183  | 0.065924  |
| 2             | 7             | -3.128708               | 1.018424  | -0.726470 |
| 3             | 6             | 1.453943                | -1.618229 | 0.113252  |
| 4             | 6             | 0.700049                | -1.763875 | -1.083535 |
| 5             | 6             | 0.540367                | -1.703638 | 1.211357  |
| 6             | 17            | -0.600823               | 0.998823  | 2.344349  |
| 7             | 6             | -0.672500               | -1.887184 | -0.733513 |
| 8             | 6             | -0.769803               | -1.872807 | 0.690689  |
| 9             | 6             | -2.018843               | 0.765003  | -0.478742 |



|    |   |           |           |           |
|----|---|-----------|-----------|-----------|
| 10 | 6 | 0.445571  | 1.100908  | -2.021346 |
| 11 | 6 | 1.525341  | 1.509955  | -1.162209 |
| 12 | 1 | -0.281877 | 1.836593  | -2.352195 |
| 13 | 6 | -0.126606 | 2.869047  | -0.034394 |
| 14 | 6 | 1.187993  | 2.428343  | -0.124202 |
| 15 | 1 | -0.456152 | 3.392649  | 0.852244  |
| 16 | 1 | -0.748005 | 2.974046  | -0.910306 |
| 17 | 6 | 2.198441  | 2.827974  | 0.936177  |
| 18 | 6 | 2.976195  | 1.211787  | -1.490634 |
| 19 | 1 | 3.596233  | 1.032484  | -0.607463 |
| 20 | 1 | 3.408921  | 2.071083  | -2.026222 |
| 21 | 1 | 3.063230  | 0.347349  | -2.152829 |
| 22 | 1 | 2.858439  | 3.615072  | 0.543948  |
| 23 | 1 | 2.833382  | 1.994229  | 1.254077  |
| 24 | 1 | 1.687446  | 3.222157  | 1.818360  |
| 25 | 6 | 1.254019  | -2.030214 | -2.459339 |
| 26 | 6 | 2.954910  | -1.702813 | 0.253999  |
| 27 | 6 | 0.950860  | -1.826800 | 2.656393  |
| 28 | 6 | -2.016358 | -2.102131 | 1.505538  |
| 29 | 6 | -1.786997 | -2.184248 | -1.706991 |
| 30 | 1 | 1.431485  | -3.109327 | -2.578698 |
| 31 | 1 | 2.206679  | -1.524680 | -2.637183 |
| 32 | 1 | 0.559213  | -1.726825 | -3.248436 |
| 33 | 1 | 3.246572  | -2.716286 | 0.566734  |
| 34 | 1 | 3.340025  | -1.010104 | 1.010555  |
| 35 | 1 | 3.467965  | -1.490101 | -0.686511 |
| 36 | 1 | 1.289670  | -2.854032 | 2.859116  |
| 37 | 1 | 0.123196  | -1.598309 | 3.330215  |
| 38 | 1 | 1.773570  | -1.150197 | 2.908857  |
| 39 | 1 | -2.086796 | -3.154861 | 1.814932  |
| 40 | 1 | -2.921253 | -1.865588 | 0.936543  |
| 41 | 1 | -2.017417 | -1.481371 | 2.406125  |
| 42 | 1 | -1.765043 | -3.243033 | -2.002461 |
| 43 | 1 | -1.700429 | -1.585559 | -2.620115 |
| 44 | 1 | -2.770044 | -1.987023 | -1.270027 |
| 45 | 1 | 0.705023  | 0.405947  | -2.810341 |
| 46 | 6 | -4.491267 | 1.375817  | -0.978344 |
| 47 | 1 | -4.661008 | 2.408423  | -0.663572 |
| 48 | 1 | -4.704285 | 1.286215  | -2.046298 |
| 49 | 1 | -5.159043 | 0.715356  | -0.419855 |

TS1<sup>Me</sup>-3<sup>Me</sup> (E = -830.669533 a.u.)

| Center Number | Atomic Number | Coordinates (Angstroms) |           |           |
|---------------|---------------|-------------------------|-----------|-----------|
|               |               | X                       | Y         | Z         |
| 1             | 22            | -1.151381               | -0.548876 | -0.646017 |
| 2             | 7             | -3.170645               | 1.347574  | -2.316808 |
| 3             | 6             | 1.225520                | -1.092852 | -0.868639 |
| 4             | 6             | 1.093479                | -0.298542 | 0.298187  |
| 5             | 6             | 0.831228                | -0.303088 | -1.988951 |
| 6             | 17            | -1.538490               | -2.344000 | -2.240448 |
| 7             | 6             | 0.608336                | 0.990335  | -0.095938 |
| 8             | 6             | 0.455985                | 0.985943  | -1.511397 |
| 9             | 6             | -2.529348               | 0.600833  | -1.633418 |
| 10            | 6             | -1.822390               | 0.188380  | 1.375307  |
| 11            | 6             | -2.055559               | -1.226485 | 1.433167  |
| 12            | 1             | -2.662720               | 0.856978  | 1.205190  |
| 13            | 6             | -3.578413               | -0.805908 | -0.407430 |
| 14            | 6             | -2.909447               | -1.752084 | 0.457332  |
| 15            | 1             | -4.155804               | -1.247772 | -1.212263 |
| 16            | 1             | -4.065652               | 0.035545  | 0.080751  |
| 17            | 6             | -3.241243               | -3.226178 | 0.370385  |
| 18            | 6             | -1.431829               | -2.105924 | 2.500871  |
| 19            | 1             | -0.973482               | -3.015128 | 2.097131  |
| 20            | 1             | -2.208994               | -2.421736 | 3.211620  |
| 21            | 1             | -0.674718               | -1.559562 | 3.066821  |

|    |   |           |           |           |
|----|---|-----------|-----------|-----------|
| 22 | 1 | -4.037362 | -3.466613 | 1.091340  |
| 23 | 1 | -2.382068 | -3.865469 | 0.593636  |
| 24 | 1 | -3.597260 | -3.482364 | -0.629598 |
| 25 | 6 | 1.601774  | -0.661237 | 1.670415  |
| 26 | 6 | 1.769965  | -2.496824 | -0.938534 |
| 27 | 6 | 0.978609  | -0.681308 | -3.438861 |
| 28 | 6 | 0.170119  | 2.194718  | -2.367758 |
| 29 | 6 | 0.542122  | 2.229480  | 0.762249  |
| 30 | 1 | 2.656675  | -0.366296 | 1.767394  |
| 31 | 1 | 1.545374  | -1.737083 | 1.859895  |
| 32 | 1 | 1.050546  | -0.149873 | 2.465087  |
| 33 | 1 | 2.835749  | -2.483296 | -1.208218 |
| 34 | 1 | 1.239296  | -3.089809 | -1.689085 |
| 35 | 1 | 1.680125  | -3.014517 | 0.021856  |
| 36 | 1 | 1.944646  | -0.321241 | -3.823000 |
| 37 | 1 | 0.188651  | -0.242345 | -4.056176 |
| 38 | 1 | 0.937347  | -1.763452 | -3.577903 |
| 39 | 1 | 1.109588  | 2.709285  | -2.617249 |
| 40 | 1 | -0.475942 | 2.913437  | -1.855038 |
| 41 | 1 | -0.319706 | 1.922118  | -3.306663 |
| 42 | 1 | 1.409084  | 2.874796  | 0.559231  |
| 43 | 1 | 0.557020  | 1.990151  | 1.828889  |
| 44 | 1 | -0.360046 | 2.818854  | 0.565435  |
| 45 | 1 | -1.117117 | 0.586570  | 2.093541  |
| 46 | 6 | -4.566703 | 1.656754  | -2.586664 |
| 47 | 1 | -4.747663 | 2.710470  | -2.359293 |
| 48 | 1 | -4.761733 | 1.500581  | -3.650609 |
| 49 | 1 | -5.242224 | 1.031408  | -1.994849 |

$3^{\text{Me}}$  (E = -830.7077649 a.u.)

| Center Number | Atomic Number | Coordinates (Angstroms) |           |           |
|---------------|---------------|-------------------------|-----------|-----------|
|               |               | X                       | Y         | Z         |
| 1             | 22            | 0.467417                | -0.775951 | -0.324679 |
| 2             | 7             | -0.644604               | 0.662488  | -1.282985 |
| 3             | 6             | 2.695206                | -1.391866 | 0.279847  |
| 4             | 6             | 2.022068                | -1.013309 | 1.476354  |
| 5             | 6             | 2.785971                | -0.241235 | -0.558617 |
| 6             | 17            | 0.366172                | -2.318911 | -2.084291 |
| 7             | 6             | 1.683342                | 0.372599  | 1.371150  |
| 8             | 6             | 2.171308                | 0.848058  | 0.120147  |
| 9             | 6             | -1.077393               | 0.494049  | -0.109001 |
| 10            | 6             | -1.237820               | 1.290933  | -2.467165 |
| 11            | 6             | -0.894539               | -1.809891 | 1.041440  |
| 12            | 6             | -2.330597               | -1.842851 | 0.601960  |
| 13            | 1             | -0.795323               | -1.280035 | 1.992523  |
| 14            | 6             | -2.397339               | 0.660485  | 0.553446  |
| 15            | 6             | -3.066401               | -0.718818 | 0.433671  |
| 16            | 1             | -2.252744               | 0.950401  | 1.601136  |
| 17            | 1             | -3.024250               | 1.426239  | 0.081236  |
| 18            | 6             | -4.539818               | -0.647950 | 0.090845  |
| 19            | 6             | -2.880864               | -3.238448 | 0.368549  |
| 20            | 1             | -3.875098               | -3.254291 | -0.084174 |
| 21            | 1             | -2.924473               | -3.799329 | 1.312740  |
| 22            | 1             | -2.200671               | -3.785983 | -0.296968 |
| 23            | 1             | -5.009584               | -1.631833 | 0.030212  |
| 24            | 1             | -4.701768               | -0.138241 | -0.870969 |
| 25            | 1             | -5.086068               | -0.069013 | 0.850418  |
| 26            | 6             | 1.870541                | -1.868886 | 2.707860  |
| 27            | 6             | 3.292366                | -2.745690 | -0.011965 |
| 28            | 6             | 3.471843                | -0.184136 | -1.900911 |
| 29            | 6             | 2.105214                | 2.273712  | -0.367285 |
| 30            | 6             | 1.082116                | 1.213565  | 2.469863  |
| 31            | 1             | 2.777299                | -1.805393 | 3.326037  |
| 32            | 1             | 1.716007                | -2.923403 | 2.458054  |
| 33            | 1             | 1.027593                | -1.549192 | 3.327321  |

|    |   |           |           |           |
|----|---|-----------|-----------|-----------|
| 34 | 1 | 4.343677  | -2.779182 | 0.308103  |
| 35 | 1 | 3.258368  | -2.978658 | -1.080016 |
| 36 | 1 | 2.760977  | -3.543945 | 0.515648  |
| 37 | 1 | 4.544116  | 0.023717  | -1.775458 |
| 38 | 1 | 3.056433  | 0.604018  | -2.537034 |
| 39 | 1 | 3.376007  | -1.130432 | -2.441094 |
| 40 | 1 | 2.961213  | 2.849446  | 0.011725  |
| 41 | 1 | 1.194344  | 2.777644  | -0.028164 |
| 42 | 1 | 2.129354  | 2.329660  | -1.460042 |
| 43 | 1 | 1.856532  | 1.524802  | 3.185440  |
| 44 | 1 | 0.318945  | 0.665490  | 3.032308  |
| 45 | 1 | 0.616158  | 2.121705  | 2.074754  |
| 46 | 1 | -0.503762 | -2.824213 | 1.174854  |
| 47 | 1 | -0.539169 | 2.028284  | -2.872398 |
| 48 | 1 | -2.188408 | 1.780189  | -2.229866 |
| 49 | 1 | -1.399161 | 0.519995  | -3.226426 |

TS3<sup>Me</sup>-4<sup>Me</sup> (E = -830.6981749 a.u.)

| Center Number | Atomic Number | Coordinates (Angstroms) |           |           |
|---------------|---------------|-------------------------|-----------|-----------|
|               |               | X                       | Y         | Z         |
| 1             | 22            | 0.307741                | -0.418734 | -0.299960 |
| 2             | 7             | -0.746711               | 1.337527  | -0.624382 |
| 3             | 6             | 2.469196                | -1.468286 | 0.312607  |
| 4             | 6             | 1.944076                | -0.792581 | 1.449264  |
| 5             | 6             | 2.749840                | -0.496521 | -0.690312 |
| 6             | 17            | 0.124603                | -1.547954 | -2.318159 |
| 7             | 6             | 1.851180                | 0.594690  | 1.130374  |
| 8             | 6             | 2.359860                | 0.776176  | -0.195325 |
| 9             | 6             | -1.497772               | 0.439095  | -0.158967 |
| 10            | 6             | -1.037891               | 2.715783  | -1.046719 |
| 11            | 6             | -0.873506               | -1.754898 | 0.997416  |
| 12            | 6             | -2.230199               | -2.152485 | 0.478649  |
| 13            | 1             | -0.959680               | -1.202246 | 1.940991  |
| 14            | 6             | -2.915718               | 0.229507  | 0.210495  |
| 15            | 6             | -3.206132               | -1.267191 | 0.173358  |
| 16            | 1             | -3.065813               | 0.656684  | 1.215364  |
| 17            | 1             | -3.600029               | 0.778211  | -0.451490 |
| 18            | 6             | -4.622779               | -1.597037 | -0.246653 |
| 19            | 6             | -2.404132               | -3.654457 | 0.325790  |
| 20            | 1             | -3.326911               | -3.944458 | -0.181978 |
| 21            | 1             | -2.381277               | -4.152076 | 1.305656  |
| 22            | 1             | -1.564127               | -4.056726 | -0.256389 |
| 23            | 1             | -4.833095               | -2.668233 | -0.253523 |
| 24            | 1             | -4.836544               | -1.205258 | -1.253114 |
| 25            | 1             | -5.348005               | -1.125648 | 0.434197  |
| 26            | 6             | 1.714419                | -1.396827 | 2.810418  |
| 27            | 6             | 2.757491                | -2.944313 | 0.207388  |
| 28            | 6             | 3.420593                | -0.766272 | -2.011811 |
| 29            | 6             | 2.584256                | 2.093182  | -0.898368 |
| 30            | 6             | 1.450364                | 1.690311  | 2.090914  |
| 31            | 1             | 2.647758                | -1.374672 | 3.390838  |
| 32            | 1             | 1.389875                | -2.439675 | 2.750949  |
| 33            | 1             | 0.959968                | -0.847445 | 3.382253  |
| 34            | 1             | 3.800152                | -3.161865 | 0.480377  |
| 35            | 1             | 2.599085                | -3.310321 | -0.812343 |
| 36            | 1             | 2.115789                | -3.529582 | 0.874005  |
| 37            | 1             | 4.512422                | -0.799929 | -1.885552 |
| 38            | 1             | 3.194824                | 0.012910  | -2.746302 |
| 39            | 1             | 3.102210                | -1.722099 | -2.438049 |
| 40            | 1             | 3.638810                | 2.394035  | -0.824739 |
| 41            | 1             | 1.985147                | 2.894286  | -0.456144 |
| 42            | 1             | 2.333569                | 2.036974  | -1.963499 |
| 43            | 1             | 2.310104                | 2.008749  | 2.697678  |
| 44            | 1             | 0.668167                | 1.360045  | 2.783408  |
| 45            | 1             | 1.076312                | 2.575155  | 1.566126  |

|    |   |           |           |           |
|----|---|-----------|-----------|-----------|
| 46 | 1 | -0.276644 | -2.648766 | 1.200579  |
| 47 | 1 | -0.544909 | 3.415941  | -0.365473 |
| 48 | 1 | -2.115330 | 2.910851  | -1.047501 |
| 49 | 1 | -0.634439 | 2.873410  | -2.050265 |

$4^{\text{Me}}$  (E = -830.7008941 a.u.)

| Center Number | Atomic Number | Coordinates (Angstroms) |           |           |
|---------------|---------------|-------------------------|-----------|-----------|
|               |               | X                       | Y         | Z         |
| 1             | 22            | 0.341341                | -0.386986 | -0.378123 |
| 2             | 7             | -0.725371               | 1.333570  | -0.537358 |
| 3             | 6             | 2.492033                | -1.484738 | 0.175113  |
| 4             | 6             | 1.986075                | -0.871214 | 1.351990  |
| 5             | 6             | 2.770597                | -0.456964 | -0.774082 |
| 6             | 17            | 0.196128                | -1.633152 | -2.364721 |
| 7             | 6             | 1.904299                | 0.534874  | 1.113436  |
| 8             | 6             | 2.406430                | 0.789429  | -0.199773 |
| 9             | 6             | -1.489479               | 0.323790  | -0.614482 |
| 10            | 6             | -1.041869               | 2.767202  | -0.477419 |
| 11            | 6             | -0.952424               | -1.493196 | 1.021188  |
| 12            | 6             | -2.308725               | -2.023658 | 0.603859  |
| 13            | 1             | -1.060631               | -0.788259 | 1.859422  |
| 14            | 6             | -2.939777               | 0.070075  | -0.616657 |
| 15            | 6             | -3.238211               | -1.320721 | -0.075164 |
| 16            | 1             | -3.490001               | 0.852255  | -0.068939 |
| 17            | 1             | -3.294620               | 0.133928  | -1.656332 |
| 18            | 6             | -4.645997               | -1.774116 | -0.404194 |
| 19            | 6             | -2.538609               | -3.458702 | 1.053406  |
| 20            | 1             | -3.485982               | -3.885267 | 0.716563  |
| 21            | 1             | -2.499648               | -3.532786 | 2.149401  |
| 22            | 1             | -1.731455               | -4.094553 | 0.664024  |
| 23            | 1             | -4.916762               | -2.726586 | 0.054395  |
| 24            | 1             | -4.780248               | -1.872504 | -1.492309 |
| 25            | 1             | -5.378227               | -1.026496 | -0.063565 |
| 26            | 6             | 1.771404                | -1.535045 | 2.687517  |
| 27            | 6             | 2.772671                | -2.951734 | -0.029573 |
| 28            | 6             | 3.434703                | -0.661058 | -2.110635 |
| 29            | 6             | 2.628152                | 2.142578  | -0.832614 |
| 30            | 6             | 1.537183                | 1.565469  | 2.155193  |
| 31            | 1             | 2.662294                | -1.402207 | 3.317826  |
| 32            | 1             | 1.599431                | -2.610987 | 2.588470  |
| 33            | 1             | 0.919969                | -1.111608 | 3.230354  |
| 34            | 1             | 3.840092                | -3.171760 | 0.114826  |
| 35            | 1             | 2.501674                | -3.268118 | -1.042408 |
| 36            | 1             | 2.209936                | -3.573613 | 0.673895  |
| 37            | 1             | 4.521333                | -0.770814 | -1.982646 |
| 38            | 1             | 3.263986                | 0.186638  | -2.781625 |
| 39            | 1             | 3.061077                | -1.559131 | -2.611095 |
| 40            | 1             | 3.682406                | 2.440827  | -0.746508 |
| 41            | 1             | 2.028661                | 2.919124  | -0.348808 |
| 42            | 1             | 2.374929                | 2.142356  | -1.898702 |
| 43            | 1             | 2.375757                | 1.730230  | 2.846754  |
| 44            | 1             | 0.676865                | 1.252477  | 2.758124  |
| 45            | 1             | 1.294932                | 2.532271  | 1.703895  |
| 46            | 1             | -0.354801               | -2.322555 | 1.405015  |
| 47            | 1             | -0.590106               | 3.206847  | 0.415876  |
| 48            | 1             | -2.124158               | 2.932635  | -0.456737 |
| 49            | 1             | -0.618470               | 3.263064  | -1.355663 |

$\text{TS4}^{\text{Me}}\text{-5}^{\text{Me}}$  (E = -830.6862308 a.u.)

| Center Number | Atomic Number | Coordinates (Angstroms) |   |   |
|---------------|---------------|-------------------------|---|---|
|               |               | X                       | Y | Z |

|    |    |           |           |           |
|----|----|-----------|-----------|-----------|
| 1  | 22 | 0.727945  | -0.140872 | -0.750833 |
| 2  | 7  | -0.467373 | 1.370362  | -0.570204 |
| 3  | 6  | 2.955165  | -1.098614 | -0.546702 |
| 4  | 6  | 2.524729  | -0.667950 | 0.739764  |
| 5  | 6  | 3.075635  | 0.052948  | -1.381972 |
| 6  | 17 | 0.394166  | -1.444902 | -2.695183 |
| 7  | 6  | 2.356129  | 0.750274  | 0.691709  |
| 8  | 6  | 2.707987  | 1.194060  | -0.620602 |
| 9  | 6  | -1.154448 | 0.241407  | -0.591465 |
| 10 | 6  | -0.896939 | 2.702305  | -0.151604 |
| 11 | 6  | -0.740542 | -1.044152 | 0.859760  |
| 12 | 6  | -2.163531 | -1.533805 | 0.972075  |
| 13 | 1  | -0.404698 | -0.567080 | 1.786735  |
| 14 | 6  | -2.609561 | 0.012554  | -0.818734 |
| 15 | 6  | -3.091791 | -1.046888 | 0.136456  |
| 16 | 1  | -3.187379 | 0.939447  | -0.689962 |
| 17 | 1  | -2.757490 | -0.302337 | -1.861241 |
| 18 | 6  | -4.546288 | -1.435567 | 0.042008  |
| 19 | 6  | -2.397072 | -2.588304 | 2.033581  |
| 20 | 1  | -3.443395 | -2.898056 | 2.103143  |
| 21 | 1  | -2.089216 | -2.215603 | 3.020413  |
| 22 | 1  | -1.792064 | -3.482758 | 1.829264  |
| 23 | 1  | -4.832273 | -2.193269 | 0.775381  |
| 24 | 1  | -4.774289 | -1.831704 | -0.957635 |
| 25 | 1  | -5.193753 | -0.559868 | 0.191903  |
| 26 | 6  | 2.434324  | -1.523638 | 1.979742  |
| 27 | 6  | 3.328407  | -2.503534 | -0.947495 |
| 28 | 6  | 3.590116  | 0.052055  | -2.798849 |
| 29 | 6  | 2.793144  | 2.627152  | -1.087905 |
| 30 | 6  | 2.039365  | 1.631660  | 1.876643  |
| 31 | 1  | 3.396746  | -1.528246 | 2.510674  |
| 32 | 1  | 2.187475  | -2.563966 | 1.743242  |
| 33 | 1  | 1.679105  | -1.155223 | 2.681799  |
| 34 | 1  | 4.418894  | -2.638774 | -0.912342 |
| 35 | 1  | 2.995041  | -2.728125 | -1.965475 |
| 36 | 1  | 2.882919  | -3.248376 | -0.280315 |
| 37 | 1  | 4.688318  | -0.001160 | -2.809715 |
| 38 | 1  | 3.298381  | 0.960734  | -3.334991 |
| 39 | 1  | 3.206097  | -0.803843 | -3.362251 |
| 40 | 1  | 3.829024  | 2.990657  | -1.033709 |
| 41 | 1  | 2.182159  | 3.290575  | -0.469111 |
| 42 | 1  | 2.460046  | 2.739215  | -2.125362 |
| 43 | 1  | 2.950369  | 1.840897  | 2.455233  |
| 44 | 1  | 1.323145  | 1.161389  | 2.559732  |
| 45 | 1  | 1.620103  | 2.593655  | 1.567638  |
| 46 | 1  | -0.095047 | -1.921546 | 0.708382  |
| 47 | 1  | -0.216753 | 3.452020  | -0.561806 |
| 48 | 1  | -0.891209 | 2.787706  | 0.943873  |
| 49 | 1  | -1.911152 | 2.919294  | -0.509044 |

$5^{\text{Me}}$  (E = -830.7116004 a.u.)

| Center Number | Atomic Number | Coordinates (Angstroms) |           |           |
|---------------|---------------|-------------------------|-----------|-----------|
|               |               | X                       | Y         | Z         |
| 1             | 22            | 0.694786                | -0.108999 | -0.395838 |
| 2             | 7             | -0.383057               | 1.417211  | 0.004553  |
| 3             | 6             | 2.870575                | -1.132057 | -0.499570 |
| 4             | 6             | 2.647005                | -0.637913 | 0.817256  |
| 5             | 6             | 2.894066                | -0.018806 | -1.389002 |
| 6             | 17            | -0.018868               | -1.324050 | -2.279653 |
| 7             | 6             | 2.531122                | 0.784991  | 0.735938  |
| 8             | 6             | 2.686012                | 1.168664  | -0.631812 |
| 9             | 6             | -1.299330               | 0.411093  | 0.137454  |
| 10            | 6             | -0.738237               | 2.815185  | -0.193080 |
| 11            | 6             | -1.102465               | -0.652273 | 1.157964  |
| 12            | 6             | -2.288122               | -1.572154 | 0.976124  |

|    |   |           |           |           |
|----|---|-----------|-----------|-----------|
| 13 | 1 | -0.927815 | -0.311458 | 2.185335  |
| 14 | 6 | -2.617470 | 0.193502  | -0.572739 |
| 15 | 6 | -3.119703 | -1.100397 | 0.032385  |
| 16 | 1 | -3.331885 | 1.011023  | -0.391336 |
| 17 | 1 | -2.499579 | 0.112594  | -1.660752 |
| 18 | 6 | -4.411643 | -1.701830 | -0.450115 |
| 19 | 6 | -2.406489 | -2.823228 | 1.804047  |
| 20 | 1 | -3.331157 | -3.369101 | 1.596038  |
| 21 | 1 | -2.387632 | -2.588797 | 2.877715  |
| 22 | 1 | -1.565085 | -3.503097 | 1.608750  |
| 23 | 1 | -4.677762 | -2.612847 | 0.093858  |
| 24 | 1 | -4.346129 | -1.952483 | -1.517679 |
| 25 | 1 | -5.238759 | -0.986732 | -0.339410 |
| 26 | 6 | 2.674122  | -1.449402 | 2.092185  |
| 27 | 6 | 3.113051  | -2.568359 | -0.889388 |
| 28 | 6 | 3.187941  | -0.082824 | -2.865922 |
| 29 | 6 | 2.812700  | 2.577228  | -1.160449 |
| 30 | 6 | 2.411969  | 1.722188  | 1.914096  |
| 31 | 1 | 3.693798  | -1.490050 | 2.501201  |
| 32 | 1 | 2.346336  | -2.480402 | 1.924537  |
| 33 | 1 | 2.032079  | -1.016605 | 2.867304  |
| 34 | 1 | 4.190355  | -2.769461 | -0.977597 |
| 35 | 1 | 2.649108  | -2.803860 | -1.852231 |
| 36 | 1 | 2.708053  | -3.263870 | -0.147248 |
| 37 | 1 | 4.273630  | -0.097344 | -3.040145 |
| 38 | 1 | 2.779047  | 0.783370  | -3.395794 |
| 39 | 1 | 2.761117  | -0.981014 | -3.321306 |
| 40 | 1 | 3.870061  | 2.837574  | -1.312891 |
| 41 | 1 | 2.397011  | 3.308648  | -0.461505 |
| 42 | 1 | 2.302783  | 2.704537  | -2.121573 |
| 43 | 1 | 3.407204  | 1.975709  | 2.306752  |
| 44 | 1 | 1.841147  | 1.275113  | 2.735010  |
| 45 | 1 | 1.914101  | 2.656575  | 1.639630  |
| 46 | 1 | -0.111532 | -1.274648 | 0.969368  |
| 47 | 1 | 0.139502  | 3.380103  | -0.512448 |
| 48 | 1 | -1.121036 | 3.256251  | 0.738889  |
| 49 | 1 | -1.516253 | 2.924707  | -0.962264 |

TS5<sup>Me</sup>-6<sup>Me</sup> (E = -830.7083392 a.u.)

| Center Number | Atomic Number | Coordinates (Angstroms) |           |           |
|---------------|---------------|-------------------------|-----------|-----------|
|               |               | X                       | Y         | Z         |
| 1             | 22            | 0.389559                | -0.241346 | -0.077127 |
| 2             | 7             | -0.580596               | 1.144596  | 0.922141  |
| 3             | 6             | 2.125673                | -1.741266 | 0.454803  |
| 4             | 6             | 2.037153                | -0.749611 | 1.480896  |
| 5             | 6             | 2.521265                | -1.081443 | -0.742743 |
| 6             | 17            | -0.182701               | 0.018581  | -2.322657 |
| 7             | 6             | 2.423707                | 0.509601  | 0.923245  |
| 8             | 6             | 2.708611                | 0.305860  | -0.450012 |
| 9             | 6             | -1.653360               | 0.361518  | 0.643600  |
| 10            | 6             | -0.723654               | 2.596429  | 1.001489  |
| 11            | 6             | -1.598266               | -1.042159 | 0.926254  |
| 12            | 6             | -2.821716               | -1.650063 | 0.314683  |
| 13            | 1             | -1.263896               | -1.376458 | 1.906760  |
| 14            | 6             | -2.886518               | 0.656933  | -0.191073 |
| 15            | 6             | -3.545570               | -0.701454 | -0.309249 |
| 16            | 1             | -3.548910               | 1.377845  | 0.308042  |
| 17            | 1             | -2.636852               | 1.076449  | -1.172183 |
| 18            | 6             | -4.845976               | -0.853489 | -1.049398 |
| 19            | 6             | -3.094582               | -3.123910 | 0.437036  |
| 20            | 1             | -4.040100               | -3.407963 | -0.033553 |
| 21            | 1             | -3.136600               | -3.430971 | 1.491308  |
| 22            | 1             | -2.293264               | -3.707654 | -0.037048 |
| 23            | 1             | -5.218836               | -1.881767 | -1.024438 |
| 24            | 1             | -4.732608               | -0.562182 | -2.102672 |

|    |   |           |           |           |
|----|---|-----------|-----------|-----------|
| 25 | 1 | -5.620024 | -0.202669 | -0.618899 |
| 26 | 6 | 1.743474  | -1.003045 | 2.941043  |
| 27 | 6 | 1.991850  | -3.233923 | 0.639658  |
| 28 | 6 | 2.810175  | -1.744213 | -2.065620 |
| 29 | 6 | 3.190476  | 1.341790  | -1.434446 |
| 30 | 6 | 2.618668  | 1.778796  | 1.711272  |
| 31 | 1 | 2.677282  | -1.143899 | 3.504310  |
| 32 | 1 | 1.139783  | -1.905510 | 3.084097  |
| 33 | 1 | 1.206189  | -0.165097 | 3.397142  |
| 34 | 1 | 2.969790  | -3.680412 | 0.871023  |
| 35 | 1 | 1.610713  | -3.720674 | -0.263341 |
| 36 | 1 | 1.314152  | -3.482983 | 1.462331  |
| 37 | 1 | 3.874524  | -2.011256 | -2.137507 |
| 38 | 1 | 2.571329  | -1.084930 | -2.905042 |
| 39 | 1 | 2.228393  | -2.662495 | -2.193487 |
| 40 | 1 | 4.280089  | 1.273774  | -1.563257 |
| 41 | 1 | 2.960419  | 2.357822  | -1.098886 |
| 42 | 1 | 2.730082  | 1.203829  | -2.417816 |
| 43 | 1 | 3.584147  | 1.756389  | 2.236415  |
| 44 | 1 | 1.837076  | 1.909616  | 2.466613  |
| 45 | 1 | 2.618409  | 2.663822  | 1.067482  |
| 46 | 1 | -0.476331 | -1.716885 | 0.218204  |
| 47 | 1 | 0.261771  | 3.063966  | 0.980748  |
| 48 | 1 | -1.228202 | 2.887005  | 1.933442  |
| 49 | 1 | -1.309187 | 2.990720  | 0.158645  |

$6^{\text{Me}}$  (E = -830.7181998 a.u.)

| Center Number | Atomic Number | Coordinates (Angstroms) |           |           |
|---------------|---------------|-------------------------|-----------|-----------|
|               |               | X                       | Y         | Z         |
| 1             | 22            | 0.315048                | -0.031718 | 0.177926  |
| 2             | 7             | -0.541419               | -1.212533 | -1.160023 |
| 3             | 6             | 2.034211                | 1.596329  | 0.250176  |
| 4             | 6             | 1.899062                | 1.132770  | -1.094168 |
| 5             | 6             | 2.455154                | 0.491270  | 1.042137  |
| 6             | 17            | -0.181353               | -1.171710 | 2.124639  |
| 7             | 6             | 2.304940                | -0.235359 | -1.140579 |
| 8             | 6             | 2.626566                | -0.638842 | 0.180012  |
| 9             | 6             | -1.747230               | -0.660270 | -0.865940 |
| 10            | 6             | -0.456074               | -2.651992 | -1.416288 |
| 11            | 6             | -1.932570               | 0.710179  | -0.880893 |
| 12            | 6             | -3.217550               | 1.034493  | -0.241150 |
| 13            | 1             | -1.360868               | 1.400653  | -1.486573 |
| 14            | 6             | -2.961731               | -1.300732 | -0.216219 |
| 15            | 6             | -3.835246               | -0.112629 | 0.125259  |
| 16            | 1             | -3.468391               | -1.994406 | -0.900537 |
| 17            | 1             | -2.678801               | -1.875922 | 0.671842  |
| 18            | 6             | -5.184381               | -0.299501 | 0.761496  |
| 19            | 6             | -3.693736               | 2.453538  | -0.086085 |
| 20            | 1             | -4.694374               | 2.506394  | 0.352743  |
| 21            | 1             | -3.722077               | 2.968249  | -1.056200 |
| 22            | 1             | -3.009825               | 3.019524  | 0.560594  |
| 23            | 1             | -5.700829               | 0.653444  | 0.912856  |
| 24            | 1             | -5.096993               | -0.791578 | 1.740413  |
| 25            | 1             | -5.830579               | -0.936603 | 0.140618  |
| 26            | 6             | 1.540396                | 1.975382  | -2.294162 |
| 27            | 6             | 1.934709                | 3.027767  | 0.714036  |
| 28            | 6             | 2.795868                | 0.537906  | 2.509531  |
| 29            | 6             | 3.143629                | -1.987439 | 0.614611  |
| 30            | 6             | 2.452174                | -1.040048 | -2.405504 |
| 31            | 1             | 2.446029                | 2.393914  | -2.756507 |
| 32            | 1             | 0.895576                | 2.816864  | -2.020466 |
| 33            | 1             | 1.023792                | 1.387840  | -3.060565 |
| 34            | 1             | 2.918937                | 3.513700  | 0.648628  |
| 35            | 1             | 1.597495                | 3.092856  | 1.752318  |
| 36            | 1             | 1.235263                | 3.604250  | 0.101917  |

|    |   |           |           |           |
|----|---|-----------|-----------|-----------|
| 37 | 1 | 3.849360  | 0.820259  | 2.649234  |
| 38 | 1 | 2.640829  | -0.432853 | 2.988105  |
| 39 | 1 | 2.181116  | 1.269263  | 3.043304  |
| 40 | 1 | 4.235589  | -1.957969 | 0.735277  |
| 41 | 1 | 2.913400  | -2.767455 | -0.117345 |
| 42 | 1 | 2.711189  | -2.292397 | 1.572496  |
| 43 | 1 | 3.282912  | -0.646283 | -3.006739 |
| 44 | 1 | 1.546336  | -0.998456 | -3.019620 |
| 45 | 1 | 2.670933  | -2.090959 | -2.196198 |
| 46 | 1 | -0.297213 | 1.447632  | 0.658942  |
| 47 | 1 | 0.591103  | -2.946145 | -1.503181 |
| 48 | 1 | -0.966281 | -2.912544 | -2.353382 |
| 49 | 1 | -0.906725 | -3.236714 | -0.601182 |

$7^{\text{Me}}$  (E = -963.4610289 a.u.)

| Center Number | Atomic Number | Coordinates (Angstroms) |           |           |
|---------------|---------------|-------------------------|-----------|-----------|
|               |               | X                       | Y         | Z         |
| 1             | 22            | -0.781852               | -0.044633 | -0.340699 |
| 2             | 7             | 1.022954                | -0.699538 | -0.706757 |
| 3             | 6             | -2.515537               | 0.322509  | 1.361854  |
| 4             | 6             | -1.386533               | -0.357802 | 1.928566  |
| 5             | 6             | -3.089767               | -0.517746 | 0.373538  |
| 6             | 17            | -1.629633               | 0.047727  | -2.621288 |
| 7             | 6             | -1.269741               | -1.620203 | 1.284370  |
| 8             | 6             | -2.309910               | -1.706729 | 0.300679  |
| 9             | 6             | 2.309333                | -0.355010 | -0.329523 |
| 10            | 6             | 0.938098                | -1.885072 | -1.594435 |
| 11            | 6             | 2.731970                | 0.520190  | 0.627744  |
| 12            | 6             | 4.194649                | 0.594362  | 0.635872  |
| 13            | 1             | 2.089136                | 1.087020  | 1.286565  |
| 14            | 6             | 3.553639                | -0.925702 | -0.999875 |
| 15            | 6             | 4.702457                | -0.238032 | -0.306234 |
| 16            | 1             | 3.613207                | -2.016140 | -0.887077 |
| 17            | 1             | 3.549065                | -0.730573 | -2.080263 |
| 18            | 6             | 6.134560                | -0.518756 | -0.671276 |
| 19            | 6             | 4.943349                | 1.487437  | 1.592614  |
| 20            | 1             | 6.027722                | 1.410164  | 1.465357  |
| 21            | 1             | 4.707205                | 1.231083  | 2.634698  |
| 22            | 1             | 4.661505                | 2.539794  | 1.449634  |
| 23            | 1             | 6.830345                | 0.065476  | -0.059521 |
| 24            | 1             | 6.338795                | -0.277884 | -1.725173 |
| 25            | 1             | 6.386638                | -1.581237 | -0.535144 |
| 26            | 6             | -0.621256               | 0.076667  | 3.153722  |
| 27            | 6             | -3.075668               | 1.630536  | 1.862971  |
| 28            | 6             | -4.333656               | -0.246525 | -0.430358 |
| 29            | 6             | -2.640833               | -2.901131 | -0.560516 |
| 30            | 6             | -0.309950               | -2.717198 | 1.676735  |
| 31            | 1             | -1.117984               | -0.291984 | 4.063202  |
| 32            | 1             | -0.557860               | 1.166512  | 3.225501  |
| 33            | 1             | 0.399901                | -0.315321 | 3.149523  |
| 34            | 1             | -3.731554               | 1.457681  | 2.727916  |
| 35            | 1             | -3.668265               | 2.140017  | 1.097105  |
| 36            | 1             | -2.282886               | 2.313447  | 2.184804  |
| 37            | 1             | -5.185980               | -0.804257 | -0.016591 |
| 38            | 1             | -4.204873               | -0.547836 | -1.474175 |
| 39            | 1             | -4.596806               | 0.815526  | -0.423504 |
| 40            | 1             | -3.492248               | -3.451116 | -0.135176 |
| 41            | 1             | -1.802430               | -3.601067 | -0.627574 |
| 42            | 1             | -2.912705               | -2.599817 | -1.577215 |
| 43            | 1             | -0.711830               | -3.292536 | 2.522970  |
| 44            | 1             | 0.661543                | -2.313674 | 1.977936  |
| 45            | 1             | -0.136668               | -3.420122 | 0.856524  |
| 46            | 1             | 0.093931                | 0.946857  | 0.674874  |
| 47            | 6             | -1.080772               | 4.640185  | -0.922102 |
| 48            | 7             | -1.087865               | 3.226290  | -0.701766 |



|    |   |           |           |           |
|----|---|-----------|-----------|-----------|
| 49 | 6 | -1.052333 | 2.074031  | -0.552334 |
| 50 | 1 | -2.058151 | 5.055497  | -0.665880 |
| 51 | 1 | -0.312728 | 5.108630  | -0.302204 |
| 52 | 1 | -0.871431 | 4.840053  | -1.975460 |
| 53 | 1 | -0.107555 | -2.134076 | -1.797580 |
| 54 | 1 | 1.415124  | -2.763953 | -1.140353 |
| 55 | 1 | 1.404129  | -1.688919 | -2.568851 |

TS7<sup>Me</sup>-8<sup>Me</sup> (E = -963.4593184 a.u.)

| Center Number | Atomic Number | Coordinates (Angstroms) |           |           |
|---------------|---------------|-------------------------|-----------|-----------|
|               |               | X                       | Y         | Z         |
| 1             | 22            | -1.006066               | 0.185486  | -0.105173 |
| 2             | 7             | 0.524273                | -1.011061 | -0.330699 |
| 3             | 6             | -2.553377               | 1.215930  | 1.499204  |
| 4             | 6             | -1.714741               | 0.252107  | 2.155716  |
| 5             | 6             | -3.352872               | 0.531178  | 0.546926  |
| 6             | 17            | -1.714949               | 0.378031  | -2.388779 |
| 7             | 6             | -2.001095               | -1.025107 | 1.602890  |
| 8             | 6             | -3.000731               | -0.846593 | 0.588372  |
| 9             | 6             | 1.843326                | -1.028577 | 0.087275  |
| 10            | 6             | 0.128102                | -2.176122 | -1.159624 |
| 11            | 6             | 2.448556                | -0.322060 | 1.084308  |
| 12            | 6             | 3.882397                | -0.623581 | 1.121027  |
| 13            | 1             | 1.955005                | 0.363755  | 1.758961  |
| 14            | 6             | 2.916305                | -1.882103 | -0.577658 |
| 15            | 6             | 4.184374                | -1.530390 | 0.159805  |
| 16            | 1             | 2.693738                | -2.954156 | -0.498292 |
| 17            | 1             | 2.987367                | -1.662985 | -1.651036 |
| 18            | 6             | 5.505089                | -2.162676 | -0.184785 |
| 19            | 6             | 4.808216                | 0.016575  | 2.124141  |
| 20            | 1             | 5.838846                | -0.335446 | 2.015999  |
| 21            | 1             | 4.484201                | -0.200658 | 3.151417  |
| 22            | 1             | 4.812999                | 1.109852  | 2.013651  |
| 23            | 1             | 6.311040                | -1.794438 | 0.458959  |
| 24            | 1             | 5.793185                | -1.956144 | -1.226151 |
| 25            | 1             | 5.469779                | -3.257194 | -0.077408 |
| 26            | 6             | -0.862801               | 0.509407  | 3.373981  |
| 27            | 6             | -2.689309               | 2.665010  | 1.894784  |
| 28            | 6             | -4.422420               | 1.134676  | -0.324068 |
| 29            | 6             | -3.677502               | -1.936547 | -0.205875 |
| 30            | 6             | -1.453789               | -2.340745 | 2.100834  |
| 31            | 1             | -1.461903               | 0.390340  | 4.288477  |
| 32            | 1             | -0.451947               | 1.523529  | 3.376225  |
| 33            | 1             | -0.024142               | -0.190396 | 3.433975  |
| 34            | 1             | -3.440401               | 2.771437  | 2.690143  |
| 35            | 1             | -3.006492               | 3.288710  | 1.053792  |
| 36            | 1             | -1.747935               | 3.071877  | 2.277085  |
| 37            | 1             | -5.414472               | 0.979562  | 0.123761  |
| 38            | 1             | -4.425239               | 0.683477  | -1.320397 |
| 39            | 1             | -4.278841               | 2.211713  | -0.451809 |
| 40            | 1             | -4.645289               | -2.190758 | 0.249136  |
| 41            | 1             | -3.080914               | -2.853491 | -0.234513 |
| 42            | 1             | -3.865410               | -1.623130 | -1.237351 |
| 43            | 1             | -2.039473               | -2.697958 | 2.959827  |
| 44            | 1             | -0.411631               | -2.248810 | 2.421112  |
| 45            | 1             | -1.495823               | -3.117019 | 1.331140  |
| 46            | 1             | 0.154599                | 1.018630  | 0.827505  |
| 47            | 6             | 0.907132                | 4.330965  | -0.063539 |
| 48            | 7             | -0.021231               | 3.266001  | -0.340392 |
| 49            | 6             | -0.447343               | 2.173316  | -0.229735 |
| 50            | 1             | 0.356690                | 5.225432  | 0.237163  |
| 51            | 1             | 1.600227                | 4.038692  | 0.731508  |
| 52            | 1             | 1.469775                | 4.559257  | -0.971895 |
| 53            | 1             | -0.940468               | -2.132539 | -1.390322 |
| 54            | 1             | 0.325296                | -3.123673 | -0.640250 |

|    |   |          |           |           |
|----|---|----------|-----------|-----------|
| 55 | 1 | 0.654398 | -2.179542 | -2.122843 |
|----|---|----------|-----------|-----------|

$8^{\text{Me}}$  (E = -963.4776729 a.u.)

| Center Number | Atomic Number | Coordinates (Angstroms) |           |           |
|---------------|---------------|-------------------------|-----------|-----------|
|               |               | X                       | Y         | Z         |
| 1             | 22            | -0.908005               | -0.169752 | -0.522631 |
| 2             | 7             | 0.879325                | -0.860348 | -0.899100 |
| 3             | 6             | -2.412661               | 0.674892  | 1.238004  |
| 4             | 6             | -1.129017               | 0.403943  | 1.807588  |
| 5             | 6             | -2.944478               | -0.543203 | 0.752382  |
| 6             | 17            | -2.167121               | -0.663222 | -2.396815 |
| 7             | 6             | -0.870814               | -0.990139 | 1.678344  |
| 8             | 6             | -1.985453               | -1.574235 | 1.000587  |
| 9             | 6             | 2.135459                | -0.461072 | -0.481569 |
| 10            | 6             | 0.868781                | -2.092081 | -1.731115 |
| 11            | 6             | 2.482562                | 0.560549  | 0.355803  |
| 12            | 6             | 3.937921                | 0.627798  | 0.498257  |
| 13            | 1             | 1.806404                | 1.234774  | 0.857608  |
| 14            | 6             | 3.424783                | -1.134289 | -0.930512 |
| 15            | 6             | 4.513336                | -0.349428 | -0.244664 |
| 16            | 1             | 3.448741                | -2.193528 | -0.643922 |
| 17            | 1             | 3.534018                | -1.110592 | -2.022273 |
| 18            | 6             | 5.967900                | -0.679659 | -0.435549 |
| 19            | 6             | 4.610201                | 1.667668  | 1.357776  |
| 20            | 1             | 5.699754                | 1.568222  | 1.345292  |
| 21            | 1             | 4.277463                | 1.590872  | 2.401916  |
| 22            | 1             | 4.360583                | 2.680840  | 1.014472  |
| 23            | 1             | 6.614844                | -0.007384 | 0.137315  |
| 24            | 1             | 6.262901                | -0.602558 | -1.492293 |
| 25            | 1             | 6.193536                | -1.708115 | -0.117598 |
| 26            | 6             | -0.309943               | 1.394279  | 2.597694  |
| 27            | 6             | -3.131143               | 1.997110  | 1.247562  |
| 28            | 6             | -4.324282               | -0.725034 | 0.177503  |
| 29            | 6             | -2.181954               | -3.041999 | 0.711528  |
| 30            | 6             | 0.289588                | -1.743512 | 2.279306  |
| 31            | 1             | -0.814112               | 1.618252  | 3.548112  |
| 32            | 1             | -0.179181               | 2.343197  | 2.066752  |
| 33            | 1             | 0.679733                | 0.997637  | 2.838015  |
| 34            | 1             | -4.035576               | 1.932806  | 1.867645  |
| 35            | 1             | -3.425451               | 2.302121  | 0.237934  |
| 36            | 1             | -2.498810               | 2.790474  | 1.654518  |
| 37            | 1             | -5.045191               | -0.916840 | 0.985379  |
| 38            | 1             | -4.367864               | -1.565925 | -0.519490 |
| 39            | 1             | -4.653892               | 0.167782  | -0.361769 |
| 40            | 1             | -2.695898               | -3.530613 | 1.551332  |
| 41            | 1             | -1.229667               | -3.561811 | 0.565674  |
| 42            | 1             | -2.790870               | -3.197515 | -0.184314 |
| 43            | 1             | 0.083532                | -1.979147 | 3.332868  |
| 44            | 1             | 1.218493                | -1.167746 | 2.237870  |
| 45            | 1             | 0.466255                | -2.689494 | 1.758831  |
| 46            | 1             | 0.632995                | 2.178722  | -0.703954 |
| 47            | 6             | -0.862349               | 4.014600  | -1.700187 |
| 48            | 7             | -1.289384               | 2.676984  | -1.257772 |
| 49            | 6             | -0.432516               | 1.870265  | -0.793385 |
| 50            | 1             | -1.444887               | 4.773411  | -1.165091 |
| 51            | 1             | 0.212287                | 4.195304  | -1.535885 |
| 52            | 1             | -1.085417               | 4.123965  | -2.767504 |
| 53            | 1             | -0.151115               | -2.347236 | -2.020430 |
| 54            | 1             | 1.295687                | -2.941974 | -1.183110 |
| 55            | 1             | 1.442773                | -1.943746 | -2.654191 |

**TS8<sup>Me</sup>-9<sup>Me</sup>** (E = -963.477474 a.u.)

| Center Number | Atomic Number | Coordinates (Angstroms) |           |           |
|---------------|---------------|-------------------------|-----------|-----------|
|               |               | X                       | Y         | Z         |
| 1             | 22            | 0.689283                | -0.191634 | 0.163658  |
| 2             | 7             | 0.661195                | 1.732337  | 0.510852  |
| 3             | 6             | 1.683752                | -2.174821 | 1.106851  |
| 4             | 6             | 1.806707                | -1.113889 | 2.051885  |
| 5             | 6             | 2.423738                | -1.809059 | -0.049468 |
| 6             | 17            | 0.787712                | 0.109161  | -2.162834 |
| 7             | 6             | 2.705244                | -0.141709 | 1.517204  |
| 8             | 6             | 3.072969                | -0.558200 | 0.213500  |
| 9             | 6             | -0.698374               | 1.915610  | 0.460980  |
| 10            | 6             | 1.502687                | 2.799006  | -0.042567 |
| 11            | 6             | -1.594841               | 1.305926  | 1.300600  |
| 12            | 6             | -2.962554               | 1.559694  | 0.846194  |
| 13            | 1             | -1.336486               | 0.805264  | 2.223853  |
| 14            | 6             | -1.486220               | 2.647220  | -0.612424 |
| 15            | 6             | -2.923318               | 2.354936  | -0.252742 |
| 16            | 1             | -1.282518               | 3.725762  | -0.620147 |
| 17            | 1             | -1.218875               | 2.267154  | -1.605283 |
| 18            | 6             | -4.062376               | 2.938920  | -1.039700 |
| 19            | 6             | -4.166391               | 1.016452  | 1.571442  |
| 20            | 1             | -5.103718               | 1.358875  | 1.123299  |
| 21            | 1             | -4.163224               | 1.326489  | 2.625294  |
| 22            | 1             | -4.169265               | -0.081416 | 1.557651  |
| 23            | 1             | -5.034882               | 2.652479  | -0.627513 |
| 24            | 1             | -4.031655               | 2.607282  | -2.087019 |
| 25            | 1             | -4.013396               | 4.037224  | -1.052420 |
| 26            | 6             | 1.230394                | -1.082024 | 3.445435  |
| 27            | 6             | 1.039790                | -3.515658 | 1.343214  |
| 28            | 6             | 2.642271                | -2.666654 | -1.269217 |
| 29            | 6             | 4.065580                | 0.094776  | -0.714177 |
| 30            | 6             | 3.226902                | 1.040356  | 2.292766  |
| 31            | 1             | 1.940766                | -1.509480 | 4.167806  |
| 32            | 1             | 0.304229                | -1.660757 | 3.517236  |
| 33            | 1             | 1.015243                | -0.057362 | 3.767305  |
| 34            | 1             | 1.797359                | -4.231280 | 1.693268  |
| 35            | 1             | 0.595859                | -3.919608 | 0.428824  |
| 36            | 1             | 0.254908                | -3.469018 | 2.103743  |
| 37            | 1             | 3.516764                | -3.318285 | -1.126679 |
| 38            | 1             | 2.815122                | -2.055207 | -2.158571 |
| 39            | 1             | 1.777951                | -3.305731 | -1.473140 |
| 40            | 1             | 4.969478                | -0.524459 | -0.795786 |
| 41            | 1             | 4.373531                | 1.080890  | -0.355308 |
| 42            | 1             | 3.651874                | 0.216131  | -1.720399 |
| 43            | 1             | 3.741633                | 0.694728  | 3.198974  |
| 44            | 1             | 2.419093                | 1.712784  | 2.601672  |
| 45            | 1             | 3.946248                | 1.622984  | 1.711009  |
| 46            | 1             | -1.431678               | -1.655786 | 1.618562  |
| 47            | 6             | -2.629823               | -2.787658 | -0.383182 |
| 48            | 7             | -1.454033               | -1.904313 | -0.430393 |
| 49            | 6             | -0.977801               | -1.413809 | 0.633116  |
| 50            | 1             | 1.323306                | 3.748833  | 0.478728  |
| 51            | 1             | 2.553539                | 2.534001  | 0.071858  |
| 52            | 1             | 1.308914                | 2.939257  | -1.115660 |
| 53            | 1             | -3.434314               | -2.352363 | -0.986475 |
| 54            | 1             | -2.374585               | -3.756159 | -0.828625 |
| 55            | 1             | -2.994519               | -2.947461 | 0.645667  |

**9<sup>Me</sup>** (E = -963.4983595 a.u.)

| Center Number | Atomic Number | Coordinates (Angstroms) |   |   |
|---------------|---------------|-------------------------|---|---|
|               |               | X                       | Y | Z |

|    |    |           |           |           |
|----|----|-----------|-----------|-----------|
| 1  | 22 | 0.779327  | -0.072158 | 0.364759  |
| 2  | 7  | -0.922504 | -0.984753 | 0.026503  |
| 3  | 6  | 2.584885  | 1.262774  | -0.656573 |
| 4  | 6  | 1.535977  | 1.016384  | -1.602078 |
| 5  | 6  | 3.159178  | 0.022517  | -0.306015 |
| 6  | 17 | 1.537456  | -1.522477 | 2.140619  |
| 7  | 6  | 1.501454  | -0.385835 | -1.866487 |
| 8  | 6  | 2.481833  | -1.005451 | -1.043585 |
| 9  | 6  | -2.221383 | -0.522360 | -0.060243 |
| 10 | 6  | -0.794260 | -2.460172 | -0.049391 |
| 11 | 6  | -2.687427 | 0.693463  | -0.467616 |
| 12 | 6  | -4.146518 | 0.749018  | -0.329724 |
| 13 | 1  | -2.088991 | 1.494116  | -0.876016 |
| 14 | 6  | -3.429015 | -1.357016 | 0.349813  |
| 15 | 6  | -4.605064 | -0.432813 | 0.149129  |
| 16 | 1  | -3.528681 | -2.262328 | -0.262764 |
| 17 | 1  | -3.336932 | -1.698175 | 1.389068  |
| 18 | 6  | -6.014960 | -0.869486 | 0.438835  |
| 19 | 6  | -4.938374 | 1.975713  | -0.705177 |
| 20 | 1  | -6.013474 | 1.831938  | -0.559820 |
| 21 | 1  | -4.773691 | 2.241613  | -1.758562 |
| 22 | 1  | -4.630947 | 2.842372  | -0.103619 |
| 23 | 1  | -6.738379 | -0.076914 | 0.220126  |
| 24 | 1  | -6.142064 | -1.151613 | 1.494359  |
| 25 | 1  | -6.295659 | -1.748924 | -0.159734 |
| 26 | 6  | 0.768404  | 2.064123  | -2.368624 |
| 27 | 6  | 3.020691  | 2.624164  | -0.176974 |
| 28 | 6  | 4.339690  | -0.211542 | 0.599030  |
| 29 | 6  | 2.891937  | -2.456702 | -1.045372 |
| 30 | 6  | 0.656802  | -1.047733 | -2.927269 |
| 31 | 1  | 1.289583  | 2.311231  | -3.304892 |
| 32 | 1  | 0.662637  | 2.991714  | -1.797579 |
| 33 | 1  | -0.235207 | 1.716639  | -2.633145 |
| 34 | 1  | 3.707159  | 3.087149  | -0.899502 |
| 35 | 1  | 3.542918  | 2.568217  | 0.783136  |
| 36 | 1  | 2.171136  | 3.305500  | -0.055911 |
| 37 | 1  | 5.238573  | -0.428463 | 0.004319  |
| 38 | 1  | 4.162924  | -1.059082 | 1.268023  |
| 39 | 1  | 4.556215  | 0.663863  | 1.218906  |
| 40 | 1  | 3.872431  | -2.572352 | -1.528464 |
| 41 | 1  | 2.181498  | -3.081021 | -1.595610 |
| 42 | 1  | 2.973801  | -2.849826 | -0.026397 |
| 43 | 1  | 1.120395  | -0.921438 | -3.915963 |
| 44 | 1  | -0.348241 | -0.617191 | -2.972269 |
| 45 | 1  | 0.548895  | -2.121483 | -2.750485 |
| 46 | 1  | -0.690857 | 2.673684  | 0.695553  |
| 47 | 6  | 0.724824  | 1.939337  | 3.109317  |
| 48 | 7  | 0.518050  | 1.357140  | 1.785124  |
| 49 | 6  | -0.122101 | 1.743438  | 0.772619  |
| 50 | 1  | -1.295184 | -2.856420 | -0.942872 |
| 51 | 1  | 0.257477  | -2.747348 | -0.088999 |
| 52 | 1  | -1.218707 | -2.939456 | 0.842214  |
| 53 | 1  | 0.406228  | 1.215515  | 3.863598  |
| 54 | 1  | 1.792355  | 2.127202  | 3.255210  |
| 55 | 1  | 0.162575  | 2.873220  | 3.219786  |

**TS9<sup>Me</sup>-10<sup>Me</sup>** (E = -963.482729 a.u.)

| Center Number | Atomic Number | Coordinates (Angstroms) |           |           |
|---------------|---------------|-------------------------|-----------|-----------|
|               |               | X                       | Y         | Z         |
| 1             | 22            | -0.834987               | -0.427205 | 0.062009  |
| 2             | 7             | -2.163443               | 0.917322  | -0.385571 |
| 3             | 6             | -2.350791               | 0.686769  | 0.881607  |
| 4             | 7             | 0.498787                | 0.924319  | 0.875023  |
| 5             | 6             | -2.032971               | -2.472840 | 0.454475  |
| 6             | 6             | -1.375050               | -2.082732 | 1.666363  |

|    |    |           |           |           |
|----|----|-----------|-----------|-----------|
| 7  | 6  | -1.037874 | -2.794606 | -0.499914 |
| 8  | 17 | 0.008026  | -0.175746 | -2.199162 |
| 9  | 6  | 0.032339  | -2.182756 | 1.453251  |
| 10 | 6  | 0.242619  | -2.599413 | 0.109175  |
| 11 | 6  | -2.868402 | 1.781742  | -1.323608 |
| 12 | 6  | 0.003484  | 1.891129  | 1.628313  |
| 13 | 6  | 1.860659  | 1.096566  | 0.330847  |
| 14 | 6  | -1.228954 | 1.824484  | 2.323540  |
| 15 | 1  | -3.300811 | 0.769491  | 1.407745  |
| 16 | 6  | -1.543081 | 3.191645  | 2.794245  |
| 17 | 1  | -1.470593 | 0.973475  | 2.944672  |
| 18 | 6  | 0.531776  | 3.310646  | 1.704598  |
| 19 | 6  | -0.566432 | 4.055144  | 2.434108  |
| 20 | 1  | 1.480988  | 3.352162  | 2.258420  |
| 21 | 1  | 0.743511  | 3.714158  | 0.706585  |
| 22 | 6  | -0.458398 | 5.534456  | 2.683010  |
| 23 | 6  | -2.799792 | 3.482939  | 3.572225  |
| 24 | 1  | -2.856376 | 4.527343  | 3.893252  |
| 25 | 1  | -2.856843 | 2.850450  | 4.469176  |
| 26 | 1  | -3.693424 | 3.266247  | 2.971168  |
| 27 | 1  | -1.308876 | 5.915809  | 3.256938  |
| 28 | 1  | -0.414406 | 6.098338  | 1.739554  |
| 29 | 1  | 0.457848  | 5.778441  | 3.240483  |
| 30 | 6  | -2.052069 | -1.860083 | 2.995174  |
| 31 | 6  | -3.526661 | -2.598587 | 0.279722  |
| 32 | 6  | -1.258870 | -3.349815 | -1.882872 |
| 33 | 6  | 1.561980  | -2.913707 | -0.548989 |
| 34 | 6  | 1.095452  | -1.977571 | 2.505220  |
| 35 | 1  | -2.222978 | -2.821490 | 3.501254  |
| 36 | 1  | -3.024640 | -1.371602 | 2.880641  |
| 37 | 1  | -1.442622 | -1.245438 | 3.665502  |
| 38 | 1  | -3.886554 | -3.551260 | 0.693727  |
| 39 | 1  | -3.815347 | -2.567832 | -0.775358 |
| 40 | 1  | -4.063406 | -1.795051 | 0.796099  |
| 41 | 1  | -1.120327 | -4.440676 | -1.878412 |
| 42 | 1  | -0.555216 | -2.919576 | -2.600751 |
| 43 | 1  | -2.270721 | -3.145727 | -2.246263 |
| 44 | 1  | 1.698139  | -4.000630 | -0.640948 |
| 45 | 1  | 2.406830  | -2.526318 | 0.029439  |
| 46 | 1  | 1.613930  | -2.482305 | -1.554188 |
| 47 | 1  | 1.261931  | -2.905447 | 3.070598  |
| 48 | 1  | 0.812621  | -1.199970 | 3.221727  |
| 49 | 1  | 2.053442  | -1.686031 | 2.064016  |
| 50 | 1  | 2.217046  | 0.143906  | -0.062211 |
| 51 | 1  | 2.556599  | 1.440737  | 1.105562  |
| 52 | 1  | 1.861713  | 1.813389  | -0.499225 |
| 53 | 1  | -2.604277 | 2.829222  | -1.129832 |
| 54 | 1  | -2.567793 | 1.528122  | -2.341739 |
| 55 | 1  | -3.955799 | 1.672323  | -1.218266 |

$10^{\text{Me}}$  (E = -963.5174613 a.u.)

| Center Number | Atomic Number | Coordinates (Angstroms) |           |           |
|---------------|---------------|-------------------------|-----------|-----------|
|               |               | X                       | Y         | Z         |
| 1             | 22            | -0.670747               | -0.010072 | -0.345370 |
| 2             | 7             | 0.532145                | 1.220923  | -1.056566 |
| 3             | 6             | 0.913232                | 1.250386  | 0.283311  |
| 4             | 7             | 0.800699                | -1.507865 | 0.309042  |
| 5             | 6             | -2.318419               | 1.461166  | 0.479525  |
| 6             | 6             | -1.773986               | 0.772454  | 1.608249  |
| 7             | 6             | -3.007654               | 0.506430  | -0.321052 |
| 8             | 17            | -0.952393               | -1.228545 | -2.407457 |
| 9             | 6             | -2.141235               | -0.603496 | 1.500872  |
| 10            | 6             | -2.906564               | -0.766814 | 0.314589  |
| 11            | 6             | 0.837520                | 2.212324  | -2.073541 |
| 12            | 6             | 1.962978                | -1.007049 | 0.503238  |

|    |   |           |           |           |
|----|---|-----------|-----------|-----------|
| 13 | 6 | 0.661708  | -2.955591 | 0.052843  |
| 14 | 6 | 2.121873  | 0.461548  | 0.783641  |
| 15 | 1 | 0.749201  | 2.185023  | 0.830431  |
| 16 | 6 | 3.554084  | 0.719993  | 0.316148  |
| 17 | 1 | 2.108990  | 0.578761  | 1.882127  |
| 18 | 6 | 3.320792  | -1.643267 | 0.327720  |
| 19 | 6 | 4.208932  | -0.431176 | 0.088950  |
| 20 | 1 | 3.625575  | -2.202234 | 1.225139  |
| 21 | 1 | 3.335112  | -2.355999 | -0.504049 |
| 22 | 6 | 5.640669  | -0.640249 | -0.323905 |
| 23 | 6 | 4.083759  | 2.124769  | 0.245834  |
| 24 | 1 | 5.126924  | 2.161543  | -0.081193 |
| 25 | 1 | 4.018725  | 2.611863  | 1.229615  |
| 26 | 1 | 3.487353  | 2.732259  | -0.446288 |
| 27 | 1 | 6.172233  | 0.304724  | -0.467600 |
| 28 | 1 | 5.696968  | -1.205758 | -1.264670 |
| 29 | 1 | 6.186245  | -1.223420 | 0.431854  |
| 30 | 6 | -1.160633 | 1.406398  | 2.831896  |
| 31 | 6 | -2.276816 | 2.953351  | 0.255870  |
| 32 | 6 | -3.794988 | 0.790996  | -1.575817 |
| 33 | 6 | -3.567795 | -2.030581 | -0.173365 |
| 34 | 6 | -1.857905 | -1.653674 | 2.548193  |
| 35 | 1 | -1.926421 | 1.552855  | 3.608208  |
| 36 | 1 | -0.727517 | 2.385237  | 2.608238  |
| 37 | 1 | -0.370570 | 0.782644  | 3.263933  |
| 38 | 1 | -3.075495 | 3.453545  | 0.822409  |
| 39 | 1 | -2.414152 | 3.207106  | -0.799829 |
| 40 | 1 | -1.324638 | 3.387020  | 0.579500  |
| 41 | 1 | -4.856186 | 0.949351  | -1.334491 |
| 42 | 1 | -3.728977 | -0.039646 | -2.284059 |
| 43 | 1 | -3.435458 | 1.690320  | -2.086115 |
| 44 | 1 | -4.651622 | -1.993118 | 0.006155  |
| 45 | 1 | -3.180316 | -2.916150 | 0.340578  |
| 46 | 1 | -3.407846 | -2.172631 | -1.247063 |
| 47 | 1 | -2.551973 | -1.552927 | 3.394764  |
| 48 | 1 | -0.841278 | -1.566294 | 2.947303  |
| 49 | 1 | -1.975609 | -2.667011 | 2.151798  |
| 50 | 1 | -0.295300 | -3.291737 | 0.456695  |
| 51 | 1 | 1.465005  | -3.532941 | 0.521065  |
| 52 | 1 | 1.906501  | 2.195687  | -2.330016 |
| 53 | 1 | 0.264991  | 1.995705  | -2.980713 |
| 54 | 1 | 0.649892  | -3.135457 | -1.025902 |
| 55 | 1 | 0.589563  | 3.229636  | -1.729465 |

**11**<sup>Me</sup> (E = -963.4887044 a.u.)

| Center Number | Atomic Number | Coordinates (Angstroms) |           |           |
|---------------|---------------|-------------------------|-----------|-----------|
|               |               | X                       | Y         | Z         |
| 1             | 22            | -1.075504               | 0.241129  | -0.518622 |
| 2             | 7             | 0.165511                | 1.591511  | -0.353214 |
| 3             | 6             | 0.875906                | 0.481601  | 0.169876  |
| 4             | 7             | 3.532195                | 1.926834  | -0.728415 |
| 5             | 6             | -3.056792               | 0.954733  | 0.548178  |
| 6             | 6             | -2.099119               | 0.684860  | 1.563261  |
| 7             | 6             | -3.382533               | -0.281641 | -0.097547 |
| 8             | 17            | -1.145570               | -0.605048 | -2.687945 |
| 9             | 6             | -1.798561               | -0.712290 | 1.524118  |
| 10            | 6             | -2.612922               | -1.307675 | 0.506906  |
| 11            | 6             | 0.437264                | 2.983229  | -0.012460 |
| 12            | 6             | 3.368293                | 0.737106  | -0.321573 |
| 13            | 6             | 4.770600                | 2.646616  | -0.412927 |
| 14            | 6             | 2.089450                | -0.060413 | -0.614836 |
| 15            | 1             | 1.085108                | 0.535096  | 1.247622  |
| 16            | 6             | 2.479505                | -1.473704 | -0.215141 |
| 17            | 1             | 1.851113                | 0.007478  | -1.681938 |
| 18            | 6             | 4.326928                | -0.157608 | 0.463151  |

|    |   |           |           |           |
|----|---|-----------|-----------|-----------|
| 19 | 6 | 3.675988  | -1.519655 | 0.392270  |
| 20 | 1 | 5.330209  | -0.163224 | 0.019046  |
| 21 | 1 | 4.455658  | 0.189847  | 1.498372  |
| 22 | 6 | 4.404914  | -2.714711 | 0.946948  |
| 23 | 6 | 1.563609  | -2.624902 | -0.525432 |
| 24 | 1 | 1.966143  | -3.582750 | -0.182789 |
| 25 | 1 | 1.384000  | -2.694224 | -1.606490 |
| 26 | 1 | 0.582376  | -2.481627 | -0.055579 |
| 27 | 1 | 3.835004  | -3.641820 | 0.837144  |
| 28 | 1 | 4.622960  | -2.576740 | 2.015769  |
| 29 | 1 | 5.371966  | -2.850719 | 0.441842  |
| 30 | 6 | -1.583784 | 1.653151  | 2.596478  |
| 31 | 6 | -3.681498 | 2.294059  | 0.234655  |
| 32 | 6 | -4.418270 | -0.469797 | -1.176961 |
| 33 | 6 | -2.683404 | -2.774901 | 0.161316  |
| 34 | 6 | -0.954623 | -1.451308 | 2.533220  |
| 35 | 1 | -2.144617 | 1.538880  | 3.534702  |
| 36 | 1 | -1.693188 | 2.691693  | 2.272148  |
| 37 | 1 | -0.526806 | 1.483725  | 2.826052  |
| 38 | 1 | -4.660284 | 2.385970  | 0.725827  |
| 39 | 1 | -3.846460 | 2.428664  | -0.840296 |
| 40 | 1 | -3.059758 | 3.123788  | 0.584141  |
| 41 | 1 | -5.392470 | -0.715615 | -0.730806 |
| 42 | 1 | -4.146801 | -1.280413 | -1.858938 |
| 43 | 1 | -4.550563 | 0.435938  | -1.777001 |
| 44 | 1 | -3.541958 | -3.246416 | 0.659776  |
| 45 | 1 | -1.785107 | -3.311530 | 0.481460  |
| 46 | 1 | -2.798664 | -2.930901 | -0.916138 |
| 47 | 1 | -1.557472 | -1.714124 | 3.414469  |
| 48 | 1 | -0.110942 | -0.845904 | 2.877352  |
| 49 | 1 | -0.548301 | -2.381475 | 2.124741  |
| 50 | 1 | 5.269834  | 2.919051  | -1.350329 |
| 51 | 1 | 5.481811  | 2.095141  | 0.216604  |
| 52 | 1 | 4.512074  | 3.583088  | 0.095718  |
| 53 | 1 | -0.403709 | 3.615084  | -0.316466 |
| 54 | 1 | 0.601573  | 3.100445  | 1.069219  |
| 55 | 1 | 1.343424  | 3.315654  | -0.530087 |

TS11<sup>Me</sup>-12<sup>Me</sup> (E = -963.4604818 a.u.)

| Center Number | Atomic Number | Coordinates (Angstroms) |           |           |
|---------------|---------------|-------------------------|-----------|-----------|
|               |               | X                       | Y         | Z         |
| 1             | 22            | 0.990432                | 0.033892  | -0.345796 |
| 2             | 7             | 0.302974                | -0.849834 | 1.206870  |
| 3             | 6             | -0.283999               | 0.371020  | 1.413144  |
| 4             | 7             | -2.408198               | -1.126587 | -0.087791 |
| 5             | 6             | 3.190296                | 0.306084  | 0.370466  |
| 6             | 6             | 2.567078                | 1.584395  | 0.497240  |
| 7             | 6             | 3.263847                | -0.001370 | -1.020923 |
| 8             | 17            | 0.532500                | -1.458079 | -2.102300 |
| 9             | 6             | 2.252254                | 2.057476  | -0.817999 |
| 10            | 6             | 2.687954                | 1.078439  | -1.750038 |
| 11            | 6             | 0.584837                | -1.750555 | 2.310636  |
| 12            | 6             | -2.222865               | 0.102199  | -0.300464 |
| 13            | 6             | -3.502595               | -1.844157 | -0.740290 |
| 14            | 6             | -1.125006               | 0.917687  | 0.389932  |
| 15            | 1             | -0.022496               | 0.969749  | 2.288971  |
| 16            | 6             | -1.744385               | 2.289012  | 0.508768  |
| 17            | 1             | -0.310879               | 1.126650  | -0.815122 |
| 18            | 6             | -3.062806               | 1.114348  | -1.069393 |
| 19            | 6             | -2.800280               | 2.400353  | -0.318263 |
| 20            | 1             | -2.742164               | 1.182469  | -2.118971 |
| 21            | 1             | -4.124598               | 0.855728  | -1.080017 |
| 22            | 6             | -3.692783               | 3.587925  | -0.547938 |
| 23            | 6             | -1.235700               | 3.326984  | 1.471487  |
| 24            | 1             | -1.834249               | 4.240559  | 1.425356  |

|    |   |           |           |           |
|----|---|-----------|-----------|-----------|
| 25 | 1 | -0.195137 | 3.598760  | 1.267719  |
| 26 | 1 | -1.274544 | 2.957389  | 2.504553  |
| 27 | 1 | -3.394808 | 4.461738  | 0.037754  |
| 28 | 1 | -4.734453 | 3.347408  | -0.293190 |
| 29 | 1 | -3.684756 | 3.873784  | -1.609252 |
| 30 | 6 | 2.534965  | 2.390985  | 1.773638  |
| 31 | 6 | 3.839318  | -0.477445 | 1.485342  |
| 32 | 6 | 3.932758  | -1.212759 | -1.619301 |
| 33 | 6 | 2.602559  | 1.180360  | -3.250704 |
| 34 | 6 | 1.728601  | 3.426879  | -1.179259 |
| 35 | 1 | 3.522614  | 2.839369  | 1.954759  |
| 36 | 1 | 2.292854  | 1.776204  | 2.646628  |
| 37 | 1 | 1.811447  | 3.208443  | 1.730187  |
| 38 | 1 | 4.887707  | -0.170770 | 1.612833  |
| 39 | 1 | 3.836394  | -1.553068 | 1.281184  |
| 40 | 1 | 3.332405  | -0.319534 | 2.442140  |
| 41 | 1 | 4.999564  | -1.008902 | -1.791561 |
| 42 | 1 | 3.480473  | -1.489227 | -2.574864 |
| 43 | 1 | 3.865452  | -2.083157 | -0.958724 |
| 44 | 1 | 3.546909  | 1.559114  | -3.667394 |
| 45 | 1 | 1.805205  | 1.862252  | -3.562666 |
| 46 | 1 | 2.400019  | 0.205825  | -3.704441 |
| 47 | 1 | 2.562881  | 4.102970  | -1.415099 |
| 48 | 1 | 1.163203  | 3.880342  | -0.361369 |
| 49 | 1 | 1.073538  | 3.393199  | -2.055412 |
| 50 | 1 | -3.063103 | -2.583244 | -1.420434 |
| 51 | 1 | -4.200390 | -1.218438 | -1.312886 |
| 52 | 1 | -4.063656 | -2.397723 | 0.020568  |
| 53 | 1 | 1.342725  | -2.478885 | 2.011476  |
| 54 | 1 | 0.943474  | -1.204712 | 3.198612  |
| 55 | 1 | -0.326213 | -2.294605 | 2.592083  |

$^{12}\text{Me}$  (E = -963.4773152 a.u.)

| Center Number | Atomic Number | Coordinates (Angstroms) |           |           |
|---------------|---------------|-------------------------|-----------|-----------|
|               |               | X                       | Y         | Z         |
| 1             | 22            | -0.712706               | 0.398773  | 0.060462  |
| 2             | 7             | -0.078977               | 0.550535  | 1.886545  |
| 3             | 6             | 0.965544                | -0.320785 | 1.717640  |
| 4             | 7             | 2.102974                | 2.298598  | 0.619888  |
| 5             | 6             | -2.709199               | -0.755196 | 0.548142  |
| 6             | 6             | -1.722789               | -1.734859 | 0.238889  |
| 7             | 6             | -2.975760               | -0.016098 | -0.643869 |
| 8             | 17            | -1.129851               | 2.580188  | -0.581453 |
| 9             | 6             | -1.361361               | -1.583136 | -1.133234 |
| 10            | 6             | -2.142642               | -0.521241 | -1.676449 |
| 11            | 6             | -0.645489               | 0.703060  | 3.221755  |
| 12            | 6             | 2.428730                | 1.153241  | 0.181192  |
| 13            | 6             | 2.626405                | 3.505553  | -0.013491 |
| 14            | 6             | 1.966381                | -0.132182 | 0.792246  |
| 15            | 1             | 0.945266                | -1.256126 | 2.287293  |
| 16            | 6             | 2.905663                | -1.171093 | 0.342873  |
| 17            | 1             | 0.370930                | 0.120019  | -1.185932 |
| 18            | 6             | 3.444175                | 0.773100  | -0.894626 |
| 19            | 6             | 3.730749                | -0.680608 | -0.610041 |
| 20            | 1             | 3.026480                | 0.911264  | -1.901315 |
| 21            | 1             | 4.349886                | 1.385747  | -0.841546 |
| 22            | 6             | 4.813242                | -1.391228 | -1.370088 |
| 23            | 6             | 2.899950                | -2.567225 | 0.908714  |
| 24            | 1             | 3.687631                | -3.185026 | 0.469746  |
| 25            | 1             | 1.941192                | -3.069800 | 0.728809  |
| 26            | 1             | 3.055228                | -2.551215 | 1.995708  |
| 27            | 1             | 4.912452                | -2.441876 | -1.083595 |
| 28            | 1             | 5.785369                | -0.903195 | -1.211167 |
| 29            | 1             | 4.614438                | -1.351464 | -2.450727 |
| 30            | 6             | -1.293746               | -2.861439 | 1.146160  |



|    |   |           |           |           |
|----|---|-----------|-----------|-----------|
| 31 | 6 | -3.504567 | -0.658550 | 1.826534  |
| 32 | 6 | -4.051774 | 1.025397  | -0.802588 |
| 33 | 6 | -2.111903 | -0.029182 | -3.099422 |
| 34 | 6 | -0.444717 | -2.497006 | -1.906660 |
| 35 | 1 | -2.005451 | -3.695840 | 1.068569  |
| 36 | 1 | -1.261791 | -2.558052 | 2.197260  |
| 37 | 1 | -0.307456 | -3.249892 | 0.877839  |
| 38 | 1 | -4.452710 | -1.205390 | 1.723091  |
| 39 | 1 | -3.753817 | 0.377666  | 2.078182  |
| 40 | 1 | -2.967697 | -1.090537 | 2.675311  |
| 41 | 1 | -4.999825 | 0.542583  | -1.080894 |
| 42 | 1 | -3.799265 | 1.750913  | -1.579583 |
| 43 | 1 | -4.220107 | 1.581814  | 0.124292  |
| 44 | 1 | -2.893202 | -0.518370 | -3.698384 |
| 45 | 1 | -1.147847 | -0.236051 | -3.573646 |
| 46 | 1 | -2.279272 | 1.051220  | -3.149090 |
| 47 | 1 | -0.991344 | -3.389881 | -2.242647 |
| 48 | 1 | 0.401753  | -2.834108 | -1.300945 |
| 49 | 1 | -0.037706 | -1.999217 | -2.790841 |
| 50 | 1 | 1.786934  | 4.025872  | -0.491380 |
| 51 | 1 | 3.408074  | 3.339609  | -0.767746 |
| 52 | 1 | 3.018923  | 4.171643  | 0.763158  |
| 53 | 1 | -1.627087 | 1.176876  | 3.158878  |
| 54 | 1 | -0.746344 | -0.266646 | 3.736898  |
| 55 | 1 | 0.004019  | 1.344196  | 3.831855  |

TS12<sup>Me</sup>-19<sup>Me</sup> (E = -963.477027 a.u.)

| Center Number | Atomic Number | Coordinates (Angstroms) |           |           |
|---------------|---------------|-------------------------|-----------|-----------|
|               |               | X                       | Y         | Z         |
| 1             | 22            | -0.788753               | 0.449633  | 0.160730  |
| 2             | 7             | -0.011314               | 0.388167  | 1.929054  |
| 3             | 6             | 1.094101                | -0.407072 | 1.729618  |
| 4             | 7             | 1.947181                | 2.254096  | 0.478184  |
| 5             | 6             | -2.802004               | -0.713998 | 0.499297  |
| 6             | 6             | -1.778914               | -1.692672 | 0.348806  |
| 7             | 6             | -2.973069               | -0.060437 | -0.763050 |
| 8             | 17            | -1.471601               | 2.636472  | -0.090402 |
| 9             | 6             | -1.274697               | -1.596672 | -0.980068 |
| 10            | 6             | -2.027187               | -0.594214 | -1.668309 |
| 11            | 6             | -0.564216               | 0.435433  | 3.281619  |
| 12            | 6             | 2.495567                | 1.141208  | 0.209681  |
| 13            | 6             | 2.399814                | 3.476986  | -0.177560 |
| 14            | 6             | 2.116601                | -0.151461 | 0.852926  |
| 15            | 1             | 1.119843                | -1.351593 | 2.282604  |
| 16            | 6             | 3.140991                | -1.135105 | 0.474474  |
| 17            | 1             | 0.260643                | 0.365131  | -1.139162 |
| 18            | 6             | 3.679606                | 0.840488  | -0.709622 |
| 19            | 6             | 4.013763                | -0.598897 | -0.409603 |
| 20            | 1             | 3.412142                | 0.984725  | -1.765094 |
| 21            | 1             | 4.528145                | 1.505039  | -0.510387 |
| 22            | 6             | 5.191911                | -1.247784 | -1.077234 |
| 23            | 6             | 3.164542                | -2.533421 | 1.035504  |
| 24            | 1             | 3.991994                | -3.120280 | 0.628455  |
| 25            | 1             | 2.232353                | -3.069209 | 0.813604  |
| 26            | 1             | 3.273663                | -2.516949 | 2.128221  |
| 27            | 1             | 5.310807                | -2.298468 | -0.798401 |
| 28            | 1             | 6.123231                | -0.722397 | -0.821278 |
| 29            | 1             | 5.092544                | -1.196029 | -2.171025 |
| 30            | 6             | -1.407325               | -2.747446 | 1.360851  |
| 31            | 6             | -3.698063               | -0.524850 | 1.698811  |
| 32            | 6             | -4.060856               | 0.925617  | -1.094404 |
| 33            | 6             | -1.876909               | -0.205790 | -3.116011 |
| 34            | 6             | -0.246817               | -2.505008 | -1.604768 |
| 35            | 1             | -2.062448               | -3.622765 | 1.247253  |
| 36            | 1             | -1.515758               | -2.389797 | 2.388930  |

|    |   |           |           |           |
|----|---|-----------|-----------|-----------|
| 37 | 1 | -0.377493 | -3.093196 | 1.232654  |
| 38 | 1 | -4.662083 | -1.027432 | 1.536312  |
| 39 | 1 | -3.910393 | 0.533126  | 1.887659  |
| 40 | 1 | -3.257396 | -0.947111 | 2.606211  |
| 41 | 1 | -4.960220 | 0.388705  | -1.429615 |
| 42 | 1 | -3.758736 | 1.609050  | -1.892373 |
| 43 | 1 | -4.334912 | 1.534389  | -0.228567 |
| 44 | 1 | -2.592839 | -0.756596 | -3.742669 |
| 45 | 1 | -0.870881 | -0.423169 | -3.486033 |
| 46 | 1 | -2.060328 | 0.863268  | -3.264178 |
| 47 | 1 | -0.734223 | -3.386678 | -2.045410 |
| 48 | 1 | 0.480886  | -2.862664 | -0.870585 |
| 49 | 1 | 0.308369  | -1.996243 | -2.397732 |
| 50 | 1 | 1.576160  | 3.858698  | -0.793352 |
| 51 | 1 | 3.291196  | 3.366958  | -0.810975 |
| 52 | 1 | 2.602658  | 4.234300  | 0.588564  |
| 53 | 1 | -1.566565 | 0.868275  | 3.259540  |
| 54 | 1 | -0.614026 | -0.566591 | 3.738530  |
| 55 | 1 | 0.064597  | 1.068041  | 3.921892  |

$^{19}\text{Me}$  (E = -963.5188804 a.u.)

| Center Number | Atomic Number | Coordinates (Angstroms) |           |           |
|---------------|---------------|-------------------------|-----------|-----------|
|               |               | X                       | Y         | Z         |
| 1             | 22            | 0.974159                | 0.010110  | -0.611772 |
| 2             | 7             | -0.352863               | 1.609495  | -0.974307 |
| 3             | 6             | -1.661681               | 1.642123  | -0.725016 |
| 4             | 7             | -0.805965               | -1.188277 | -0.433086 |
| 5             | 6             | 2.700926                | 1.178816  | 0.576992  |
| 6             | 6             | 3.174304                | -0.155458 | 0.404745  |
| 7             | 6             | 1.522809                | 1.120318  | 1.380886  |
| 8             | 17            | 1.779790                | -1.479664 | -2.253309 |
| 9             | 6             | 2.310800                | -1.030741 | 1.115260  |
| 10            | 6             | 1.277609                | -0.248119 | 1.707517  |
| 11            | 6             | 0.165315                | 2.876142  | -1.547404 |
| 12            | 6             | -2.032795               | -0.759119 | -0.245188 |
| 13            | 6             | -0.639887               | -2.659101 | -0.385997 |
| 14            | 6             | -2.464860               | 0.587341  | -0.323591 |
| 15            | 1             | -2.160817               | 2.599611  | -0.882323 |
| 16            | 6             | -3.911130               | 0.632708  | -0.044586 |
| 17            | 1             | 1.776622                | 1.052330  | -1.621726 |
| 18            | 6             | -3.249086               | -1.613434 | 0.067829  |
| 19            | 6             | -4.376557               | -0.614673 | 0.189715  |
| 20            | 1             | -3.430924               | -2.346097 | -0.729811 |
| 21            | 1             | -3.102339               | -2.198016 | 0.985761  |
| 22            | 6             | -5.772841               | -1.068219 | 0.513803  |
| 23            | 6             | -4.691024               | 1.921071  | -0.048425 |
| 24            | 1             | -5.741270               | 1.760215  | 0.210380  |
| 25            | 1             | -4.660919               | 2.399337  | -1.037176 |
| 26            | 1             | -4.272979               | 2.639376  | 0.670167  |
| 27            | 1             | -6.473590               | -0.229839 | 0.575999  |
| 28            | 1             | -5.806184               | -1.602930 | 1.474438  |
| 29            | 1             | -6.153049               | -1.763783 | -0.248754 |
| 30            | 6             | 4.439139                | -0.549421 | -0.308904 |
| 31            | 6             | 3.470293                | 2.419798  | 0.199910  |
| 32            | 6             | 0.770051                | 2.292847  | 1.958380  |
| 33            | 6             | 0.211099                | -0.730404 | 2.658950  |
| 34            | 6             | 2.531094                | -2.513570 | 1.275496  |
| 35            | 1             | 5.292961                | -0.521542 | 0.383839  |
| 36            | 1             | 4.658093                | 0.128458  | -1.139237 |
| 37            | 1             | 4.368393                | -1.559681 | -0.720201 |
| 38            | 1             | 4.264764                | 2.601949  | 0.937850  |
| 39            | 1             | 2.834760                | 3.309467  | 0.182474  |
| 40            | 1             | 3.940654                | 2.323561  | -0.782563 |
| 41            | 1             | 1.149662                | 2.530359  | 2.962441  |
| 42            | 1             | -0.299796               | 2.081545  | 2.050387  |

|    |   |           |           |           |
|----|---|-----------|-----------|-----------|
| 43 | 1 | 0.878724  | 3.190786  | 1.344052  |
| 44 | 1 | 0.527962  | -0.566882 | 3.698699  |
| 45 | 1 | 0.011745  | -1.798987 | 2.540031  |
| 46 | 1 | -0.733727 | -0.196659 | 2.515101  |
| 47 | 1 | 3.355140  | -2.694440 | 1.979710  |
| 48 | 1 | 2.800078  | -2.987178 | 0.325718  |
| 49 | 1 | 1.646013  | -3.019836 | 1.670180  |
| 50 | 1 | 0.348379  | 2.756562  | -2.620228 |
| 51 | 1 | 1.110109  | 3.153250  | -1.081063 |
| 52 | 1 | -0.554187 | 3.693476  | -1.401597 |
| 53 | 1 | -0.970219 | -3.066009 | 0.578872  |
| 54 | 1 | 0.402923  | -2.919537 | -0.545468 |
| 55 | 1 | -1.224587 | -3.138943 | -1.181199 |

$20^{\text{Me}}$  (E = -963.4813566 a.u.)

| Center Number | Atomic Number | Coordinates (Angstroms) |           |           |
|---------------|---------------|-------------------------|-----------|-----------|
|               |               | X                       | Y         | Z         |
| 1             | 22            | -1.299456               | -0.453906 | 0.060875  |
| 2             | 7             | 0.268873                | 0.594814  | 0.490669  |
| 3             | 6             | 1.312575                | -0.306965 | 0.375824  |
| 4             | 7             | 3.108705                | 2.082534  | -0.668186 |
| 5             | 6             | -2.852274               | 1.038619  | 1.084516  |
| 6             | 6             | -3.412160               | -0.277358 | 1.094591  |
| 7             | 6             | -2.696849               | 1.441697  | -0.269446 |
| 8             | 17            | -0.904654               | -2.118812 | -1.472322 |
| 9             | 6             | -3.632998               | -0.670034 | -0.258111 |
| 10            | 6             | -3.165052               | 0.375206  | -1.100002 |
| 11            | 6             | 0.577134                | 1.957423  | 0.938452  |
| 12            | 6             | 3.516471                | 0.977767  | -0.168692 |
| 13            | 6             | 4.120217                | 3.070523  | -1.068912 |
| 14            | 6             | 2.665005                | -0.172861 | 0.214854  |
| 15            | 1             | 0.981479                | -1.341006 | 0.473335  |
| 16            | 6             | 3.574313                | -1.329197 | 0.372006  |
| 17            | 1             | -1.319930               | -1.364783 | 1.463871  |
| 18            | 6             | 4.966933                | 0.527434  | -0.018939 |
| 19            | 6             | 4.866364                | -0.948404 | 0.265077  |
| 20            | 1             | 5.541628                | 0.738379  | -0.929335 |
| 21            | 1             | 5.471090                | 1.073002  | 0.792457  |
| 22            | 6             | 6.113119                | -1.776708 | 0.399729  |
| 23            | 6             | 3.065790                | -2.720113 | 0.649958  |
| 24            | 1             | 3.884428                | -3.440646 | 0.724293  |
| 25            | 1             | 2.391849                | -3.061977 | -0.146591 |
| 26            | 1             | 2.499988                | -2.756960 | 1.590769  |
| 27            | 1             | 5.898177                | -2.826660 | 0.618109  |
| 28            | 1             | 6.754774                | -1.389636 | 1.204999  |
| 29            | 1             | 6.709893                | -1.741008 | -0.523409 |
| 30            | 6             | -3.911241               | -1.002223 | 2.318916  |
| 31            | 6             | -2.627558               | 1.859377  | 2.331075  |
| 32            | 6             | -2.272534               | -2.792292 | -0.795597 |
| 33            | 6             | -3.243116               | 0.425225  | -2.604982 |
| 34            | 6             | -4.293716               | -1.950780 | -0.698355 |
| 35            | 1             | -4.946761               | -0.703729 | 2.538112  |
| 36            | 1             | -3.300910               | -0.773829 | 3.197005  |
| 37            | 1             | -3.898491               | -2.086689 | 2.178569  |
| 38            | 1             | -3.565066               | 1.938434  | 2.896669  |
| 39            | 1             | -2.301970               | 2.876375  | 2.097824  |
| 40            | 1             | -1.881254               | 1.409505  | 2.995890  |
| 41            | 1             | -3.093398               | 3.238358  | -1.372292 |
| 42            | 1             | -1.402441               | 2.730484  | -1.458536 |
| 43            | 1             | -2.025544               | 3.484900  | 0.012611  |
| 44            | 1             | -4.174820               | 0.916235  | -2.920207 |
| 45            | 1             | -3.224506               | -0.575539 | -3.044047 |
| 46            | 1             | -2.410632               | 0.992385  | -3.033993 |
| 47            | 1             | -5.386914               | -1.842421 | -0.660357 |
| 48            | 1             | -4.021181               | -2.790420 | -0.051287 |

|    |   |           |           |           |
|----|---|-----------|-----------|-----------|
| 49 | 1 | -4.016228 | -2.217780 | -1.720887 |
| 50 | 1 | 1.175179  | 1.909287  | 1.858990  |
| 51 | 1 | -0.346854 | 2.487817  | 1.148914  |
| 52 | 1 | 1.167808  | 2.495266  | 0.191048  |
| 53 | 1 | 4.886799  | 3.239782  | -0.298614 |
| 54 | 1 | 3.622542  | 4.022805  | -1.271802 |
| 55 | 1 | 4.632836  | 2.758839  | -1.991025 |

**21<sup>Me</sup>** (E = -963.5003545 a.u.)

| Center Number | Atomic Number | Coordinates (Angstroms) |           |           |
|---------------|---------------|-------------------------|-----------|-----------|
|               |               | X                       | Y         | Z         |
| 1             | 22            | 0.715149                | -0.146697 | -0.155434 |
| 2             | 7             | -0.290685               | 1.605832  | -0.340498 |
| 3             | 6             | -1.627492               | 1.672380  | -0.079591 |
| 4             | 7             | -1.115410               | -1.175334 | -0.692128 |
| 5             | 6             | 2.824639                | 0.788792  | -0.953545 |
| 6             | 6             | 2.855147                | -0.636813 | -1.056407 |
| 7             | 6             | 2.807161                | 1.131508  | 0.431483  |
| 8             | 17            | -0.047838               | -1.077731 | 1.952566  |
| 9             | 6             | 2.812972                | -1.165642 | 0.262765  |
| 10            | 6             | 2.793571                | -0.070064 | 1.179451  |
| 11            | 6             | 0.228358                | 2.961818  | -0.641837 |
| 12            | 6             | -2.294667               | -0.694159 | -0.475502 |
| 13            | 6             | -1.010983               | -2.591815 | -1.083513 |
| 14            | 6             | -2.554629               | 0.663934  | -0.089991 |
| 15            | 1             | -2.009698               | 2.675123  | 0.116770  |
| 16            | 6             | -4.003365               | 0.798714  | 0.134807  |
| 17            | 1             | 0.765567                | -0.723357 | -1.706656 |
| 18            | 6             | -3.621796               | -1.422684 | -0.550563 |
| 19            | 6             | -4.624891               | -0.374401 | -0.122755 |
| 20            | 1             | -3.822013               | -1.797913 | -1.563453 |
| 21            | 1             | -3.623943               | -2.299643 | 0.109527  |
| 22            | 6             | -6.086598               | -0.712619 | -0.040532 |
| 23            | 6             | -4.630681               | 2.094438  | 0.574926  |
| 24            | 1             | -5.709781               | 1.995214  | 0.720273  |
| 25            | 1             | -4.465150               | 2.887202  | -0.167712 |
| 26            | 1             | -4.192761               | 2.440256  | 1.520799  |
| 27            | 1             | -6.690023               | 0.135828  | 0.295587  |
| 28            | 1             | -6.259671               | -1.544696 | 0.657257  |
| 29            | 1             | -6.474764               | -1.033292 | -1.018409 |
| 30            | 6             | 3.167927                | -1.410772 | -2.313542 |
| 31            | 6             | 3.026058                | 1.703875  | -2.140170 |
| 32            | 6             | 2.969428                | 2.496135  | 1.059734  |
| 33            | 6             | 2.943830                | -0.152346 | 2.674188  |
| 34            | 6             | 2.911661                | -2.625495 | 0.633533  |
| 35            | 1             | 4.257418                | -1.495357 | -2.441093 |
| 36            | 1             | 2.759764                | -0.919540 | -3.201425 |
| 37            | 1             | 2.759731                | -2.425551 | -2.278726 |
| 38            | 1             | 3.917688                | 1.395984  | -2.701802 |
| 39            | 1             | 3.183426                | 2.742627  | -1.834581 |
| 40            | 1             | 2.179343                | 1.681491  | -2.837155 |
| 41            | 1             | 3.848621                | 2.496223  | 1.717188  |
| 42            | 1             | 2.106930                | 2.780739  | 1.672956  |
| 43            | 1             | 3.123459                | 3.278892  | 0.311874  |
| 44            | 1             | 4.002913                | -0.033591 | 2.949087  |
| 45            | 1             | 2.595872                | -1.111539 | 3.062073  |
| 46            | 1             | 2.374282                | 0.631320  | 3.182991  |
| 47            | 1             | 3.962548                | -2.916367 | 0.775336  |
| 48            | 1             | 2.498303                | -3.271781 | -0.148507 |
| 49            | 1             | 2.373593                | -2.838833 | 1.561365  |
| 50            | 1             | -0.295462               | 3.384492  | -1.509010 |
| 51            | 1             | 1.283259                | 2.926785  | -0.875423 |
| 52            | 1             | 0.081383                | 3.637138  | 0.212406  |
| 53            | 1             | -1.145563               | -3.234630 | -0.204902 |
| 54            | 1             | -0.018677               | -2.774737 | -1.500338 |

| TS21 <sup>Me</sup> -13 <sup>Me</sup> (E = -963.4996556 a.u.) |               |                         |           |           |  |
|--------------------------------------------------------------|---------------|-------------------------|-----------|-----------|--|
| Center Number                                                | Atomic Number | Coordinates (Angstroms) |           |           |  |
|                                                              |               | X                       | Y         | Z         |  |
| 55                                                           | 1             | -1.757858               | -2.861918 | -1.839622 |  |
| 1                                                            | 22            | 0.099926                | 0.039280  | -0.189637 |  |
| 2                                                            | 7             | 0.018648                | 0.070345  | 1.804591  |  |
| 3                                                            | 6             | 1.151679                | 0.028658  | 2.550342  |  |
| 4                                                            | 7             | 1.924672                | 1.233101  | -0.068955 |  |
| 5                                                            | 6             | -1.329876               | -1.901761 | -0.124640 |  |
| 6                                                            | 6             | -0.240930               | -2.152725 | -1.011435 |  |
| 7                                                            | 6             | -2.127772               | -0.866889 | -0.687905 |  |
| 8                                                            | 17            | -0.798534               | 2.277853  | -0.648463 |  |
| 9                                                            | 6             | -0.389712               | -1.287087 | -2.142476 |  |
| 10                                                           | 6             | -1.553684               | -0.508791 | -1.947515 |  |
| 11                                                           | 6             | -1.213223               | 0.145947  | 2.612273  |  |
| 12                                                           | 6             | 2.714942                | 1.144263  | 0.951961  |  |
| 13                                                           | 6             | 2.397265                | 1.999879  | -1.237579 |  |
| 14                                                           | 6             | 2.403164                | 0.459395  | 2.179857  |  |
| 15                                                           | 1             | 1.028232                | -0.321790 | 3.577939  |  |
| 16                                                           | 6             | 3.609025                | 0.480469  | 3.024501  |  |
| 17                                                           | 1             | 1.468719                | -0.876568 | -0.405296 |  |
| 18                                                           | 6             | 4.124381                | 1.690721  | 1.071172  |  |
| 19                                                           | 6             | 4.595192                | 1.175007  | 2.412599  |  |
| 20                                                           | 1             | 4.755195                | 1.347345  | 0.240810  |  |
| 21                                                           | 1             | 4.132831                | 2.788518  | 1.027341  |  |
| 22                                                           | 1             | -1.208822               | -0.601360 | 3.418702  |  |
| 23                                                           | 1             | -2.088575               | -0.012533 | 1.988092  |  |
| 24                                                           | 1             | -1.301298               | 1.143421  | 3.061520  |  |
| 25                                                           | 1             | 1.564034                | 2.158724  | -1.921502 |  |
| 26                                                           | 1             | 3.193508                | 1.449713  | -1.756935 |  |
| 27                                                           | 1             | 2.784599                | 2.982300  | -0.943805 |  |
| 28                                                           | 6             | 5.983319                | 1.482193  | 2.899240  |  |
| 29                                                           | 1             | 6.740235                | 1.118298  | 2.189395  |  |
| 30                                                           | 1             | 6.137288                | 2.566790  | 2.997368  |  |
| 31                                                           | 1             | 6.191518                | 1.027327  | 3.872263  |  |
| 32                                                           | 6             | 3.650689                | -0.173110 | 4.380405  |  |
| 33                                                           | 1             | 2.926720                | 0.289676  | 5.065194  |  |
| 34                                                           | 1             | 3.394850                | -1.238963 | 4.311513  |  |
| 35                                                           | 1             | 4.639533                | -0.093066 | 4.840044  |  |
| 36                                                           | 6             | 0.521769                | -1.263536 | -3.344844 |  |
| 37                                                           | 1             | 0.265934                | -2.071543 | -4.044826 |  |
| 38                                                           | 1             | 0.444656                | -0.319349 | -3.893419 |  |
| 39                                                           | 1             | 1.569959                | -1.400596 | -3.055782 |  |
| 40                                                           | 6             | -2.187611               | 0.422968  | -2.944301 |  |
| 41                                                           | 1             | -2.979670               | -0.107696 | -3.493176 |  |
| 42                                                           | 1             | -2.631256               | 1.292220  | -2.453401 |  |
| 43                                                           | 1             | -1.464578               | 0.791327  | -3.677949 |  |
| 44                                                           | 6             | -3.452503               | -0.338351 | -0.195509 |  |
| 45                                                           | 1             | -4.241721               | -0.550966 | -0.929350 |  |
| 46                                                           | 1             | -3.755215               | -0.803829 | 0.747381  |  |
| 47                                                           | 1             | -3.424703               | 0.748208  | -0.050758 |  |
| 48                                                           | 6             | -1.633807               | -2.745059 | 1.089927  |  |
| 49                                                           | 1             | -1.894671               | -3.766413 | 0.780190  |  |
| 50                                                           | 1             | -0.774649               | -2.816842 | 1.765795  |  |
| 51                                                           | 1             | -2.478184               | -2.351616 | 1.661492  |  |
| 52                                                           | 6             | 0.707507                | -3.320421 | -0.903410 |  |
| 53                                                           | 1             | 0.221935                | -4.237127 | -1.269733 |  |
| 54                                                           | 1             | 1.612874                | -3.159144 | -1.495508 |  |
| 55                                                           | 1             | 1.015409                | -3.497374 | 0.132037  |  |
| 13 <sup>Me</sup> (E = -963.5024612 a.u.)                     |               |                         |           |           |  |
| Center Number                                                | Atomic Number | Coordinates (Angstroms) |           |           |  |
|                                                              |               | X                       | Y         | Z         |  |
| 1                                                            | 22            | -0.771747               | 0.077087  | -0.236662 |  |
| 2                                                            | 7             | 0.356458                | 1.771101  | -0.565932 |  |

|    |    |           |           |           |
|----|----|-----------|-----------|-----------|
| 3  | 6  | 1.657701  | 1.759786  | -0.295646 |
| 4  | 7  | 0.869851  | -1.168111 | -0.595262 |
| 5  | 6  | -2.378328 | 0.949788  | 1.253108  |
| 6  | 6  | -1.692036 | -0.122357 | 1.909263  |
| 7  | 6  | -3.122653 | 0.400292  | 0.169490  |
| 8  | 17 | -1.249943 | -0.029394 | -2.641648 |
| 9  | 6  | -2.007091 | -1.330627 | 1.207459  |
| 10 | 6  | -2.896597 | -1.005024 | 0.143806  |
| 11 | 6  | -0.168628 | 2.980196  | -1.227964 |
| 12 | 6  | 2.074281  | -0.723263 | -0.303732 |
| 13 | 6  | -2.534346 | -2.534346 | -1.135769 |
| 14 | 6  | 2.440890  | 0.630835  | -0.035898 |
| 15 | 1  | 2.182201  | 2.716896  | -0.357156 |
| 16 | 6  | 3.886436  | 0.657911  | 0.264118  |
| 17 | 1  | 0.219392  | 0.225010  | 1.065226  |
| 18 | 6  | 3.336699  | -1.561397 | -0.248527 |
| 19 | 6  | 4.411998  | -0.583014 | 0.159074  |
| 20 | 1  | 3.221014  | -2.392936 | 0.459198  |
| 21 | 1  | 3.554014  | -2.020408 | -1.222812 |
| 22 | 6  | 5.830796  | -1.039447 | 0.356072  |
| 23 | 6  | 4.611177  | 1.932495  | 0.610547  |
| 24 | 1  | 5.653696  | 1.744678  | 0.882210  |
| 25 | 1  | 4.127735  | 2.443308  | 1.454026  |
| 26 | 1  | 4.611194  | 2.634040  | -0.235170 |
| 27 | 1  | 6.487021  | -0.221453 | 0.668829  |
| 28 | 1  | 6.245304  | -1.462012 | -0.571077 |
| 29 | 1  | 5.893020  | -1.828759 | 1.119319  |
| 30 | 6  | -1.042176 | -0.042125 | 3.268195  |
| 31 | 6  | -2.404686 | 2.378595  | 1.741416  |
| 32 | 6  | -4.048564 | 1.142039  | -0.759990 |
| 33 | 6  | -3.554852 | -1.968749 | -0.809175 |
| 34 | 6  | -1.579345 | -2.713919 | 1.636805  |
| 35 | 1  | -1.799111 | -0.184712 | 4.053508  |
| 36 | 1  | -0.566688 | 0.929373  | 3.430732  |
| 37 | 1  | -0.275922 | -0.812207 | 3.395638  |
| 38 | 1  | -3.081621 | 2.479036  | 2.601537  |
| 39 | 1  | -2.759225 | 3.066689  | 0.967978  |
| 40 | 1  | -1.413004 | 2.715633  | 2.061716  |
| 41 | 1  | -5.095202 | 0.976266  | -0.467972 |
| 42 | 1  | -3.926325 | 0.803433  | -1.793209 |
| 43 | 1  | -3.868080 | 2.221181  | -0.738954 |
| 44 | 1  | -4.592683 | -2.159144 | -0.500761 |
| 45 | 1  | -3.037737 | -2.932979 | -0.835190 |
| 46 | 1  | -3.570429 | -1.570845 | -1.828082 |
| 47 | 1  | -2.226135 | -3.084247 | 2.444794  |
| 48 | 1  | -0.550290 | -2.720242 | 2.011593  |
| 49 | 1  | -1.640836 | -3.433014 | 0.814459  |
| 50 | 1  | -0.254361 | -2.675911 | -1.534415 |
| 51 | 1  | 0.931913  | -3.287721 | -0.357065 |
| 52 | 1  | 1.460993  | -2.704322 | -1.954564 |
| 53 | 1  | -1.149430 | 3.244677  | -0.823683 |
| 54 | 1  | 0.508517  | 3.832263  | -1.081893 |
| 55 | 1  | -0.283598 | 2.795281  | -2.301722 |

TS13<sup>Me</sup>-14<sup>Me</sup> (E = -963.3568035354 a.u.)

| Center Number | Atomic Number | Coordinates (Angstroms) |           |           |
|---------------|---------------|-------------------------|-----------|-----------|
|               |               | X                       | Y         | Z         |
| 1             | 22            | 0.672980                | 0.295842  | 0.073194  |
| 2             | 7             | -0.041367               | 0.264137  | -1.697822 |
| 3             | 6             | -1.094402               | -0.630140 | -1.516081 |
| 4             | 7             | -1.137063               | 0.680627  | 1.030134  |
| 5             | 6             | 2.496695                | -1.136257 | -0.427556 |
| 6             | 6             | 1.753389                | -1.731533 | 0.640128  |
| 7             | 6             | 3.065616                | 0.072663  | 0.057324  |
| 8             | 17            | 0.990604                | 2.722992  | 0.180169  |

|    |   |           |           |           |
|----|---|-----------|-----------|-----------|
| 9  | 6 | 1.893065  | -0.890475 | 1.793830  |
| 10 | 6 | 2.709813  | 0.208881  | 1.437450  |
| 11 | 6 | 0.392332  | 0.517653  | -3.068893 |
| 12 | 6 | -2.258783 | 0.400411  | 0.386592  |
| 13 | 6 | -1.255717 | 1.390619  | 2.317699  |
| 14 | 6 | -2.280287 | -0.325186 | -0.820720 |
| 15 | 1 | -1.132772 | -1.460117 | -2.232299 |
| 16 | 6 | -3.647974 | -0.808968 | -1.048829 |
| 17 | 1 | -0.298025 | -1.133950 | 0.020425  |
| 18 | 6 | -3.682158 | 0.544777  | 0.878092  |
| 19 | 6 | -4.475068 | -0.287570 | -0.109131 |
| 20 | 1 | -3.791343 | 0.181594  | 1.906889  |
| 21 | 1 | -4.007674 | 1.593856  | 0.884880  |
| 22 | 6 | -5.969822 | -0.396691 | 0.003627  |
| 23 | 6 | -4.010432 | -1.688214 | -2.216678 |
| 24 | 1 | -5.084127 | -1.892073 | -2.255174 |
| 25 | 1 | -3.490231 | -2.654188 | -2.161782 |
| 26 | 1 | -3.720007 | -1.218763 | -3.166392 |
| 27 | 1 | -6.397895 | -1.017284 | -0.789546 |
| 28 | 1 | -6.445375 | 0.593378  | -0.053422 |
| 29 | 1 | -6.266327 | -0.835466 | 0.967279  |
| 30 | 6 | 1.208857  | -3.139426 | 0.654060  |
| 31 | 6 | 2.742629  | -1.773806 | -1.773256 |
| 32 | 6 | 3.986756  | 1.003366  | -0.689196 |
| 33 | 6 | 3.209554  | 1.299001  | 2.348119  |
| 34 | 6 | 1.335553  | -1.208426 | 3.160439  |
| 35 | 1 | 1.995210  | -3.842301 | 0.966524  |
| 36 | 1 | 0.859077  | -3.449935 | -0.335081 |
| 37 | 1 | 0.371702  | -3.243204 | 1.350972  |
| 38 | 1 | 3.571786  | -2.492934 | -1.711419 |
| 39 | 1 | 3.008724  | -1.032678 | -2.532436 |
| 40 | 1 | 1.863028  | -2.318640 | -2.131810 |
| 41 | 1 | 5.030224  | 0.840331  | -0.383571 |
| 42 | 1 | 3.735283  | 2.049909  | -0.490895 |
| 43 | 1 | 3.932918  | 0.845500  | -1.771078 |
| 44 | 1 | 4.261635  | 1.117863  | 2.610775  |
| 45 | 1 | 2.639778  | 1.344491  | 3.281382  |
| 46 | 1 | 3.141586  | 2.279023  | 1.867182  |
| 47 | 1 | 1.945944  | -1.972831 | 3.661740  |
| 48 | 1 | 0.312088  | -1.595543 | 3.099629  |
| 49 | 1 | 1.321195  | -0.326499 | 3.807990  |
| 50 | 1 | -0.263858 | 1.553579  | 2.738618  |
| 51 | 1 | -1.852872 | 0.811489  | 3.033740  |
| 52 | 1 | -1.724418 | 2.371950  | 2.179277  |
| 53 | 1 | 1.329618  | 1.077746  | -3.057547 |
| 54 | 1 | 0.539968  | -0.418626 | -3.630486 |
| 55 | 1 | -0.356804 | 1.120066  | -3.600627 |

**$^{14}\text{Me}$**  (E = -963.5326559 a.u.)

| Center Number | Atomic Number | Coordinates (Angstroms) |           |           |
|---------------|---------------|-------------------------|-----------|-----------|
|               |               | X                       | Y         | Z         |
| 1             | 22            | -0.813103               | 0.105888  | -0.503731 |
| 2             | 7             | 0.128127                | 1.731143  | -0.754999 |
| 3             | 6             | 1.555735                | 1.909599  | -0.520773 |
| 4             | 7             | 0.652808                | -1.082206 | -0.868843 |
| 5             | 6             | -2.160239               | 0.936555  | 1.352055  |
| 6             | 6             | -1.095186               | 0.106703  | 1.820852  |
| 7             | 6             | -3.039571               | 0.124845  | 0.598669  |
| 8             | 17            | -2.040452               | -0.067655 | -2.501885 |
| 9             | 6             | -1.374983               | -1.241751 | 1.423976  |
| 10            | 6             | -2.553389               | -1.226336 | 0.642210  |
| 11            | 6             | 1.921292                | -0.647671 | -0.527182 |
| 12            | 6             | 2.337043                | 0.639663  | -0.336673 |
| 13            | 1             | 1.990270                | 2.474184  | -1.365324 |
| 14            | 6             | 3.762960                | 0.633965  | 0.038490  |

|    |   |           |           |           |
|----|---|-----------|-----------|-----------|
| 15 | 1 | 1.697571  | 2.562842  | 0.359306  |
| 16 | 6 | 3.095966  | -1.572909 | -0.272091 |
| 17 | 6 | 4.225574  | -0.639563 | 0.077891  |
| 18 | 1 | 2.880348  | -2.280586 | 0.539070  |
| 19 | 1 | 3.335925  | -2.180671 | -1.154085 |
| 20 | 6 | 5.608621  | -1.148842 | 0.376115  |
| 21 | 6 | 4.534741  | 1.902224  | 0.305519  |
| 22 | 1 | 5.581744  | 1.694563  | 0.544465  |
| 23 | 1 | 4.104987  | 2.461731  | 1.147492  |
| 24 | 1 | 4.517824  | 2.570430  | -0.565999 |
| 25 | 1 | 6.304323  | -0.333713 | 0.599732  |
| 26 | 1 | 6.020115  | -1.711445 | -0.474717 |
| 27 | 1 | 5.610255  | -1.831893 | 1.238008  |
| 28 | 6 | 0.012336  | 0.530610  | 2.754887  |
| 29 | 6 | -2.349983 | 2.393283  | 1.694363  |
| 30 | 6 | -4.340232 | 0.542410  | -0.035240 |
| 31 | 6 | -3.264907 | -2.404521 | 0.026666  |
| 32 | 6 | -0.597486 | -2.450399 | 1.880816  |
| 33 | 1 | -0.299488 | 0.410598  | 3.802805  |
| 34 | 1 | 0.282169  | 1.581556  | 2.611028  |
| 35 | 1 | 0.917644  | -0.067474 | 2.610367  |
| 36 | 1 | -2.873805 | 2.492650  | 2.655674  |
| 37 | 1 | -2.947666 | 2.917855  | 0.942671  |
| 38 | 1 | -1.393983 | 2.917258  | 1.787128  |
| 39 | 1 | -5.188638 | 0.202193  | 0.575745  |
| 40 | 1 | -4.451580 | 0.112286  | -1.035559 |
| 41 | 1 | -4.415968 | 1.630028  | -0.130056 |
| 42 | 1 | -4.206759 | -2.607673 | 0.555517  |
| 43 | 1 | -2.659713 | -3.315202 | 0.073547  |
| 44 | 1 | -3.510934 | -2.215819 | -1.024666 |
| 45 | 1 | -0.856295 | -2.695941 | 2.920328  |
| 46 | 1 | 0.483222  | -2.278215 | 1.844467  |
| 47 | 1 | -0.817756 | -3.331384 | 1.271562  |
| 48 | 6 | -0.520359 | 2.995253  | -1.121917 |
| 49 | 6 | 0.516987  | -2.457733 | -1.367166 |
| 50 | 1 | -0.345058 | 3.774878  | -0.363577 |
| 51 | 1 | -0.124805 | 3.358974  | -2.082469 |
| 52 | 1 | -1.598125 | 2.859635  | -1.238346 |
| 53 | 1 | 0.877367  | -3.201491 | -0.644423 |
| 54 | 1 | 1.079767  | -2.580758 | -2.302549 |
| 55 | 1 | -0.533078 | -2.663672 | -1.584917 |

TS14<sup>Me</sup>-15<sup>Me</sup> (E = -963.4971736 a.u.)

| Center Number | Atomic Number | Coordinates (Angstroms) |           |           |
|---------------|---------------|-------------------------|-----------|-----------|
|               |               | X                       | Y         | Z         |
| 1             | 22            | 0.493812                | -0.128256 | 0.016477  |
| 2             | 7             | 0.547808                | -0.093412 | 1.759180  |
| 3             | 6             | -0.364185               | 1.816716  | 1.805345  |
| 4             | 7             | -1.456359               | 0.506912  | -0.465285 |
| 5             | 6             | 2.807977                | 0.415691  | -0.248753 |
| 6             | 6             | 2.044657                | 1.471851  | -0.832053 |
| 7             | 6             | 2.599740                | -0.746526 | -1.032721 |
| 8             | 17            | -0.114760               | -2.414133 | -0.259338 |
| 9             | 6             | 1.418085                | 0.969005  | -2.019370 |
| 10            | 6             | 1.752503                | -0.397724 | -2.140029 |
| 11            | 6             | -2.225288               | 1.121289  | 0.413888  |
| 12            | 6             | -1.733959               | 1.666709  | 1.622815  |
| 13            | 1             | 0.049379                | 2.123381  | 2.758758  |
| 14            | 6             | -2.874103               | 1.892056  | 2.521434  |
| 15            | 1             | 0.214779                | 2.160195  | 0.957482  |
| 16            | 6             | -3.736525               | 1.187596  | 0.443726  |
| 17            | 6             | -4.030847               | 1.653734  | 1.857004  |
| 18            | 1             | -4.126340               | 1.887812  | -0.308263 |
| 19            | 1             | -4.184787               | 0.212448  | 0.220058  |
| 20            | 6             | -5.448308               | 1.822850  | 2.326721  |



|    |   |           |           |           |
|----|---|-----------|-----------|-----------|
| 21 | 6 | -2.696356 | 2.378816  | 3.934531  |
| 22 | 1 | -3.654394 | 2.529222  | 4.439778  |
| 23 | 1 | -2.149099 | 3.331388  | 3.955071  |
| 24 | 1 | -2.114579 | 1.659959  | 4.527191  |
| 25 | 1 | -5.498753 | 2.174131  | 3.361889  |
| 26 | 1 | -6.001986 | 0.874593  | 2.269018  |
| 27 | 1 | -5.992128 | 2.546025  | 1.701257  |
| 28 | 6 | 2.118480  | 2.932361  | -0.450447 |
| 29 | 6 | 3.747532  | 0.549937  | 0.923715  |
| 30 | 6 | 3.270773  | -2.084366 | -0.853662 |
| 31 | 6 | 1.381333  | -1.342699 | -3.253353 |
| 32 | 6 | 0.638957  | 1.815006  | -2.997134 |
| 33 | 1 | 2.911497  | 3.433236  | -1.024800 |
| 34 | 1 | 2.353351  | 3.069377  | 0.610259  |
| 35 | 1 | 1.184288  | 3.465050  | -0.663340 |
| 36 | 1 | 4.742667  | 0.874069  | 0.586747  |
| 37 | 1 | 3.870832  | -0.400121 | 1.452473  |
| 38 | 1 | 3.387264  | 1.286842  | 1.648660  |
| 39 | 1 | 4.140432  | -2.168871 | -1.521825 |
| 40 | 1 | 2.586079  | -2.906229 | -1.082165 |
| 41 | 1 | 3.626348  | -2.224810 | 0.171918  |
| 42 | 1 | 2.273210  | -1.633723 | -3.825485 |
| 43 | 1 | 0.675334  | -0.888137 | -3.955738 |
| 44 | 1 | 0.925696  | -2.258059 | -2.858261 |
| 45 | 1 | 1.313209  | 2.488891  | -3.544214 |
| 46 | 1 | -0.109279 | 2.439532  | -2.495452 |
| 47 | 1 | 0.117812  | 1.203115  | -3.739116 |
| 48 | 6 | 0.847642  | -0.490268 | 3.111220  |
| 49 | 1 | 1.692386  | 0.072540  | 3.537783  |
| 50 | 1 | -0.023993 | -0.346647 | 3.767188  |
| 51 | 1 | 1.103678  | -1.558413 | 3.131323  |
| 52 | 6 | -2.109065 | -0.010912 | -1.684492 |
| 53 | 1 | -1.349098 | -0.314795 | -2.403863 |
| 54 | 1 | -2.709565 | -0.897580 | -1.446663 |
| 55 | 1 | -2.752936 | 0.744502  | -2.151162 |

$^{15}\text{Me}$  (E = -963.5190324 a.u.)

| Center Number | Atomic Number | Coordinates (Angstroms) |           |           |
|---------------|---------------|-------------------------|-----------|-----------|
|               |               | X                       | Y         | Z         |
| 1             | 22            | 0.791381                | -0.605131 | 0.157556  |
| 2             | 7             | 1.148929                | -0.681605 | 1.806949  |
| 3             | 6             | -0.645646               | 1.844855  | 2.515282  |
| 4             | 7             | -1.332809               | 0.105721  | 0.024661  |
| 5             | 6             | 2.896621                | 0.337943  | -0.382013 |
| 6             | 6             | 1.914392                | 1.345288  | -0.604390 |
| 7             | 6             | 2.687085                | -0.688525 | -1.344674 |
| 8             | 17            | 0.357084                | -2.893763 | -0.346447 |
| 9             | 6             | 1.139494                | 0.964539  | -1.748531 |
| 10            | 6             | 1.613527                | -0.290227 | -2.202514 |
| 11            | 6             | -2.131718               | 0.842424  | 0.717135  |
| 12            | 6             | -1.831994               | 1.681377  | 1.909814  |
| 13            | 1             | -0.556928               | 2.489453  | 3.382125  |
| 14            | 6             | -3.101074               | 2.315929  | 2.316591  |
| 15            | 1             | 0.237272                | 1.320327  | 2.178193  |
| 16            | 6             | -3.615223               | 1.004295  | 0.429526  |
| 17            | 6             | -4.107796               | 1.940656  | 1.502409  |
| 18            | 1             | -3.785306               | 1.408966  | -0.576767 |
| 19            | 1             | -4.128236               | 0.034191  | 0.453507  |
| 20            | 6             | -5.557551               | 2.326431  | 1.549166  |
| 21            | 6             | -3.168430               | 3.237248  | 3.503554  |
| 22            | 1             | -4.180120               | 3.616092  | 3.668962  |
| 23            | 1             | -2.502196               | 4.099799  | 3.369103  |
| 24            | 1             | -2.847149               | 2.720899  | 4.417819  |
| 25            | 1             | -5.781342               | 3.011297  | 2.371175  |
| 26            | 1             | -6.192190               | 1.436689  | 1.666442  |

|    |   |           |           |           |
|----|---|-----------|-----------|-----------|
| 27 | 1 | -5.862548 | 2.810685  | 0.610705  |
| 28 | 6 | 1.851275  | 2.688977  | 0.082193  |
| 29 | 6 | 4.030085  | 0.407313  | 0.609756  |
| 30 | 6 | 3.537132  | -1.919344 | -1.538385 |
| 31 | 6 | 1.149598  | -1.072061 | -3.405596 |
| 32 | 6 | 0.105700  | 1.840185  | -2.414164 |
| 33 | 1 | 2.443453  | 3.433409  | -0.470670 |
| 34 | 1 | 2.252118  | 2.641844  | 1.099617  |
| 35 | 1 | 0.826593  | 3.069920  | 0.148193  |
| 36 | 1 | 4.907721  | 0.893616  | 0.159805  |
| 37 | 1 | 4.338740  | -0.588852 | 0.942164  |
| 38 | 1 | 3.752708  | 0.981574  | 1.499030  |
| 39 | 1 | 4.315419  | -1.732813 | -2.293234 |
| 40 | 1 | 2.937023  | -2.770058 | -1.873529 |
| 41 | 1 | 4.038840  | -2.214812 | -0.611538 |
| 42 | 1 | 1.935750  | -1.108329 | -4.172515 |
| 43 | 1 | 0.264879  | -0.621706 | -3.867595 |
| 44 | 1 | 0.903594  | -2.106575 | -3.136613 |
| 45 | 1 | 0.594796  | 2.622384  | -3.012010 |
| 46 | 1 | -0.534949 | 2.345513  | -1.682844 |
| 47 | 1 | -0.539610 | 1.270614  | -3.089977 |
| 48 | 6 | 1.681064  | -0.836277 | 3.133749  |
| 49 | 1 | 2.769673  | -0.676876 | 3.157954  |
| 50 | 1 | 1.223187  | -0.121006 | 3.835811  |
| 51 | 1 | 1.481911  | -1.848525 | 3.516165  |
| 52 | 6 | -1.953356 | -0.604398 | -1.128745 |
| 53 | 1 | -1.178120 | -1.064177 | -1.736907 |
| 54 | 1 | -2.608236 | -1.405827 | -0.770671 |
| 55 | 1 | -2.532981 | 0.083535  | -1.752433 |

$16^{\text{Me}}$  (E = -675.8581344 a.u.)

| Center Number | Atomic Number | Coordinates (Angstroms) |           |           |
|---------------|---------------|-------------------------|-----------|-----------|
|               |               | X                       | Y         | Z         |
| 1             | 22            | -0.554670               | -0.165500 | -0.476379 |
| 2             | 7             | -0.928568               | 1.471232  | -0.303342 |
| 3             | 6             | -2.020948               | -1.137328 | 1.061152  |
| 4             | 6             | -0.752852               | -0.998552 | 1.698523  |
| 5             | 6             | -1.877692               | -2.099094 | 0.012451  |
| 6             | 17            | 0.361515                | -0.583409 | -2.581625 |
| 7             | 6             | 0.163567                | -1.886223 | 1.047074  |
| 8             | 6             | -0.535188               | -2.580347 | 0.020732  |
| 9             | 6             | -1.292278               | 2.874421  | -0.175032 |
| 10            | 6             | -2.670487               | 3.091851  | -0.849255 |
| 11            | 6             | -1.364580               | 3.272713  | 1.318790  |
| 12            | 6             | -0.215168               | 3.724739  | -0.895131 |
| 13            | 1             | -0.146700               | 3.435605  | -1.948590 |
| 14            | 1             | 0.765218                | 3.570927  | -0.430865 |
| 15            | 1             | -0.401025               | 3.095302  | 1.808767  |
| 16            | 1             | -2.132017               | 2.688045  | 1.837353  |
| 17            | 1             | -3.438522               | 2.486971  | -0.354503 |
| 18            | 1             | -2.625366               | 2.803696  | -1.904778 |
| 19            | 6             | -0.469994               | -0.204367 | 2.951381  |
| 20            | 6             | -3.318511               | -0.513725 | 1.515038  |
| 21            | 6             | -2.976432               | -2.590490 | -0.899490 |
| 22            | 6             | 0.017038                | -3.659183 | -0.873906 |
| 23            | 6             | 1.609134                | -2.094335 | 1.434062  |
| 24            | 1             | -0.619294               | -0.830291 | 3.842724  |
| 25            | 1             | -1.131827               | 0.661272  | 3.036753  |
| 26            | 1             | 0.560801                | 0.164254  | 2.980051  |
| 27            | 1             | -3.829919               | -1.172869 | 2.230938  |
| 28            | 1             | -4.004029               | -0.342577 | 0.678761  |
| 29            | 1             | -3.152022               | 0.447973  | 2.007953  |
| 30            | 1             | -3.457802               | -3.482204 | -0.473426 |
| 31            | 1             | -2.590071               | -2.865857 | -1.886164 |
| 32            | 1             | -3.757349               | -1.836268 | -1.041760 |

|    |   |           |           |           |
|----|---|-----------|-----------|-----------|
| 33 | 1 | -0.296899 | -4.651449 | -0.520792 |
| 34 | 1 | 1.110552  | -3.644285 | -0.893459 |
| 35 | 1 | -0.327892 | -3.545000 | -1.906433 |
| 36 | 1 | 1.696552  | -2.903130 | 2.173042  |
| 37 | 1 | 2.043450  | -1.196242 | 1.886127  |
| 38 | 1 | 2.226956  | -2.369218 | 0.573043  |
| 39 | 1 | -1.614771 | 4.335664  | 1.420697  |
| 40 | 1 | -2.965841 | 4.146286  | -0.787358 |
| 41 | 1 | -0.465123 | 4.791165  | -0.836545 |

**$^{17}\text{Me}$**  (E = -523.4592199 a.u.)

| Center Number | Atomic Number | Coordinates (Angstroms) |           |           |
|---------------|---------------|-------------------------|-----------|-----------|
|               |               | X                       | Y         | Z         |
| 1             | 7             | 2.075137                | -1.274408 | -0.526310 |
| 2             | 6             | 1.564146                | -0.157600 | -0.843236 |
| 3             | 6             | 3.157126                | -1.484522 | 0.474456  |
| 4             | 6             | 0.511370                | -0.054930 | -1.910305 |
| 5             | 6             | 0.234186                | 1.372844  | -2.118885 |
| 6             | 6             | 1.825767                | 1.274815  | -0.363914 |
| 7             | 6             | 0.969485                | 2.126109  | -1.272684 |
| 8             | 1             | 1.531395                | 1.405044  | 0.683234  |
| 9             | 1             | 2.886292                | 1.543588  | -0.424355 |
| 10            | 6             | 1.004389                | 3.621857  | -1.138613 |
| 11            | 6             | -0.752521               | 1.841691  | -3.154084 |
| 12            | 1             | -0.831348               | 2.931646  | -3.186262 |
| 13            | 1             | -1.752424               | 1.435890  | -2.949823 |
| 14            | 1             | -0.462482               | 1.492731  | -4.154084 |
| 15            | 1             | 0.336959                | 4.122813  | -1.845238 |
| 16            | 1             | 2.022130                | 4.002966  | -1.304910 |
| 17            | 1             | 0.714958                | 3.928225  | -0.123094 |
| 18            | 6             | 2.968388                | -0.709436 | 1.801209  |
| 19            | 6             | 3.136866                | -2.999561 | 0.782819  |
| 20            | 6             | 4.508371                | -1.116798 | -0.185449 |
| 21            | 1             | 4.643634                | -1.679524 | -1.115137 |
| 22            | 1             | 4.561147                | -0.047828 | -0.419182 |
| 23            | 1             | 3.171567                | 0.359404  | 1.696371  |
| 24            | 1             | 1.948694                | -0.837848 | 2.182837  |
| 25            | 1             | 2.184229                | -3.281287 | 1.245664  |
| 26            | 1             | 3.247255                | -3.573729 | -0.142405 |
| 27            | 1             | 3.950242                | -3.268694 | 1.466651  |
| 28            | 1             | 3.661139                | -1.103215 | 2.553685  |
| 29            | 1             | 5.336283                | -1.360567 | 0.490341  |
| 30            | 6             | -0.051229               | -1.097721 | -2.538078 |
| 31            | 1             | -0.805698               | -0.964907 | -3.304353 |
| 32            | 1             | 0.245155                | -2.108474 | -2.285797 |

**$^{18}\text{Me}$**  (E = -924.1524042 a.u.)

| Center Number | Atomic Number | Coordinates (Angstroms) |           |           |
|---------------|---------------|-------------------------|-----------|-----------|
|               |               | X                       | Y         | Z         |
| 1             | 22            | -0.297764               | -0.073262 | -0.371971 |
| 2             | 7             | -0.824365               | 1.527225  | -0.222760 |
| 3             | 6             | -1.893915               | -1.062652 | 1.064522  |
| 4             | 6             | -0.648237               | -1.048388 | 1.758292  |
| 5             | 6             | -1.771845               | -1.972919 | -0.023338 |
| 6             | 17            | -0.216779               | -0.525687 | -2.696343 |
| 7             | 6             | 0.218494                | -1.998456 | 1.126474  |
| 8             | 6             | -0.472112               | -2.563364 | 0.026704  |
| 9             | 6             | -1.351062               | 2.882770  | -0.200123 |
| 10            | 6             | -2.761548               | 2.893205  | -0.841747 |
| 11            | 6             | -1.431488               | 3.404010  | 1.256617  |
| 12            | 6             | -0.400949               | 3.788288  | -1.026733 |
| 13            | 1             | -0.326626               | 3.415078  | -2.052983 |
| 14            | 1             | 0.603251                | 3.790712  | -0.587754 |
| 15            | 1             | -0.439195               | 3.393959  | 1.722671  |
| 16            | 1             | -2.100195               | 2.775264  | 1.854147  |
| 17            | 1             | -3.446808               | 2.258623  | -0.269812 |

|    |   |           |           |           |
|----|---|-----------|-----------|-----------|
| 18 | 1 | -2.710076 | 2.512046  | -1.866722 |
| 19 | 6 | -0.371370 | -0.332980 | 3.059952  |
| 20 | 6 | -3.161792 | -0.372646 | 1.503142  |
| 21 | 6 | -2.859873 | -2.356727 | -0.995440 |
| 22 | 6 | 0.024003  | -3.633358 | -0.912206 |
| 23 | 6 | 1.580422  | -2.407045 | 1.631679  |
| 24 | 1 | -0.663677 | -0.955358 | 3.918472  |
| 25 | 1 | -0.927857 | 0.607020  | 3.128236  |
| 26 | 1 | 0.692642  | -0.099214 | 3.179641  |
| 27 | 1 | -3.733474 | -1.019325 | 2.185013  |
| 28 | 1 | -3.809575 | -0.134685 | 0.653764  |
| 29 | 1 | -2.950987 | 0.562332  | 2.029807  |
| 30 | 1 | -3.383562 | -3.260488 | -0.650357 |
| 31 | 1 | -2.451485 | -2.563320 | -1.989248 |
| 32 | 1 | -3.606583 | -1.563519 | -1.102941 |
| 33 | 1 | -0.505674 | -4.581149 | -0.741349 |
| 34 | 1 | 1.093110  | -3.826953 | -0.775258 |
| 35 | 1 | -0.133633 | -3.347062 | -1.958523 |
| 36 | 1 | 1.487581  | -3.199270 | 2.388127  |
| 37 | 1 | 2.111751  | -1.571959 | 2.100635  |
| 38 | 1 | 2.215783  | -2.795939 | 0.829153  |
| 39 | 1 | -1.812084 | 4.432853  | 1.280585  |
| 40 | 1 | -3.168652 | 3.912040  | -0.864920 |
| 41 | 1 | -0.772851 | 4.820470  | -1.050523 |
| 42 | 7 | 1.868589  | 0.311090  | -0.132583 |
| 43 | 6 | 2.774825  | -0.285525 | -0.941753 |
| 44 | 6 | 2.317333  | 1.188931  | 0.794965  |
| 45 | 6 | 4.144232  | -0.032369 | -0.848166 |
| 46 | 1 | 2.373709  | -0.960605 | -1.687836 |
| 47 | 6 | 3.670543  | 1.486671  | 0.954496  |
| 48 | 1 | 1.557943  | 1.664800  | 1.402168  |
| 49 | 6 | 4.604906  | 0.866516  | 0.118213  |
| 50 | 1 | 4.828349  | -0.529961 | -1.524913 |
| 51 | 1 | 3.978813  | 2.197042  | 1.712265  |
| 52 | 1 | 5.663136  | 1.083031  | 0.213754  |

TS10<sup>Me</sup>-22<sup>Me</sup> (E = -963.4845347 a.u.)

| Center Number | Atomic Number | Coordinates (Angstroms) |           |           |
|---------------|---------------|-------------------------|-----------|-----------|
|               |               | X                       | Y         | Z         |
| 1             | 22            | -0.736612               | -0.026416 | -0.441759 |
| 2             | 7             | 0.678604                | 1.341794  | -0.715571 |
| 3             | 6             | 1.394911                | 1.646881  | 0.357019  |
| 4             | 7             | 0.854560                | -1.291867 | 0.348602  |
| 5             | 6             | -2.283295               | 1.451967  | 0.477893  |
| 6             | 6             | -1.861004               | 0.533680  | 1.495751  |
| 7             | 6             | -3.010054               | 0.698269  | -0.488330 |
| 8             | 17            | -0.872553               | -0.918571 | -2.639579 |
| 9             | 6             | -2.345408               | -0.776121 | 1.154422  |
| 10            | 6             | -3.061429               | -0.663672 | -0.062871 |
| 11            | 6             | 0.718533                | 2.299576  | -1.835176 |
| 12            | 6             | 1.851056                | -0.782260 | 0.968175  |
| 13            | 6             | 0.875261                | -2.714257 | -0.048360 |
| 14            | 6             | 1.879672                | 0.667746  | 1.410457  |
| 15            | 1             | 1.706863                | 2.681869  | 0.504657  |
| 16            | 6             | 3.336277                | 0.864407  | 1.839675  |
| 17            | 1             | 1.272726                | 0.759157  | 2.329668  |
| 18            | 6             | 3.162656                | -1.440405 | 1.344493  |
| 19            | 6             | 4.019866                | -0.288661 | 1.817157  |
| 20            | 1             | 3.015873                | -2.191580 | 2.134107  |
| 21            | 1             | 3.607521                | -1.974724 | 0.496538  |
| 22            | 6             | 5.453259                | -0.544733 | 2.198401  |
| 23            | 6             | 3.815116                | 2.216472  | 2.293519  |
| 24            | 1             | 4.833356                | 2.178557  | 2.690704  |
| 25            | 1             | 3.159786                | 2.615670  | 3.080757  |
| 26            | 1             | 3.806657                | 2.941897  | 1.469763  |

|    |   |           |           |           |
|----|---|-----------|-----------|-----------|
| 27 | 1 | 5.958090  | 0.359264  | 2.550007  |
| 28 | 1 | 6.020732  | -0.935127 | 1.341833  |
| 29 | 1 | 5.517391  | -1.300133 | 2.994290  |
| 30 | 6 | -1.293691 | 0.915955  | 2.841921  |
| 31 | 6 | -2.118462 | 2.949461  | 0.531493  |
| 32 | 6 | -3.673024 | 1.242860  | -1.729829 |
| 33 | 6 | -3.781050 | -1.772444 | -0.787910 |
| 34 | 6 | -2.250630 | -1.996736 | 2.037480  |
| 35 | 1 | -2.105115 | 1.033226  | 3.576026  |
| 36 | 1 | -0.751440 | 1.865896  | 2.800512  |
| 37 | 1 | -0.613652 | 0.153955  | 3.240849  |
| 38 | 1 | -2.818701 | 3.400804  | 1.249842  |
| 39 | 1 | -2.307285 | 3.408423  | -0.444138 |
| 40 | 1 | -1.104133 | 3.232272  | 0.841770  |
| 41 | 1 | -4.736554 | 1.449341  | -1.541541 |
| 42 | 1 | -3.611752 | 0.532959  | -2.560603 |
| 43 | 1 | -3.209302 | 2.178511  | -2.059408 |
| 44 | 1 | -4.861898 | -1.726140 | -0.591376 |
| 45 | 1 | -3.428647 | -2.758545 | -0.468539 |
| 46 | 1 | -3.633454 | -1.704874 | -1.870534 |
| 47 | 1 | -3.046229 | -1.994542 | 2.797503  |
| 48 | 1 | -1.293968 | -2.038558 | 2.570610  |
| 49 | 1 | -2.352912 | -2.922363 | 1.461374  |
| 50 | 1 | 0.158296  | -3.260317 | 0.573260  |
| 51 | 1 | 1.861469  | -3.175674 | 0.057120  |
| 52 | 1 | 1.725936  | 2.322169  | -2.271355 |
| 53 | 1 | 0.008742  | 1.987926  | -2.604247 |
| 54 | 1 | 0.547331  | -2.788228 | -1.087282 |
| 55 | 1 | 0.461621  | 3.313363  | -1.497873 |

**22<sup>Me</sup>** (E = -963.4905322 a.u.)

| Center Number | Atomic Number | Coordinates (Angstroms) |           |           |
|---------------|---------------|-------------------------|-----------|-----------|
|               |               | X                       | Y         | Z         |
| 1             | 22            | -0.912101               | -0.197286 | -0.434534 |
| 2             | 7             | 0.408136                | 0.866478  | -1.590105 |
| 3             | 6             | 1.654150                | 1.124567  | -1.275597 |
| 4             | 7             | 0.789973                | -1.375266 | -0.173686 |
| 5             | 6             | -2.023276               | 1.623282  | 0.630510  |
| 6             | 6             | -1.159005               | 0.986240  | 1.577527  |
| 7             | 6             | -3.045914               | 0.694657  | 0.305094  |
| 8             | 17            | -2.092307               | -1.442360 | -2.058426 |
| 9             | 6             | -1.658581               | -0.330256 | 1.841657  |
| 10            | 6             | -2.823469               | -0.505897 | 1.054088  |
| 11            | 6             | -0.033427               | 1.286766  | -2.939021 |
| 12            | 6             | 1.975416                | -0.873881 | 0.017306  |
| 13            | 6             | 0.677001                | -2.843096 | -0.314518 |
| 14            | 6             | 2.218739                | 0.624179  | 0.029596  |
| 15            | 1             | 2.317626                | 1.599275  | -1.996286 |
| 16            | 6             | 3.729086                | 0.729580  | 0.153347  |
| 17            | 1             | 1.745239                | 1.123052  | 0.885644  |
| 18            | 6             | 3.291708                | -1.598990 | 0.171601  |
| 19            | 6             | 4.308054                | -0.478380 | 0.235358  |
| 20            | 1             | 3.307064                | -2.208878 | 1.088848  |
| 21            | 1             | 3.497886                | -2.298850 | -0.650025 |
| 22            | 6             | 5.769199                | -0.809928 | 0.378256  |
| 23            | 6             | 4.382668                | 2.085053  | 0.205212  |
| 24            | 1             | 5.465932                | 2.017198  | 0.340055  |
| 25            | 1             | 3.975220                | 2.679818  | 1.034784  |
| 26            | 1             | 4.194789                | 2.654531  | -0.714951 |
| 27            | 1             | 6.397014                | 0.084183  | 0.428757  |
| 28            | 1             | 6.115333                | -1.417440 | -0.469699 |
| 29            | 1             | 5.948433                | -1.401400 | 1.287126  |
| 30            | 6             | -0.116800               | 1.696782  | 2.409932  |
| 31            | 6             | -1.942998               | 3.067810  | 0.199921  |
| 32            | 6             | -4.228319               | 0.942566  | -0.598026 |

|    |   |           |           |           |
|----|---|-----------|-----------|-----------|
| 33 | 6 | -3.736181 | -1.706405 | 1.053178  |
| 34 | 6 | -1.126339 | -1.275321 | 2.891576  |
| 35 | 1 | -0.593837 | 2.147348  | 3.293384  |
| 36 | 1 | 0.371359  | 2.508869  | 1.860819  |
| 37 | 1 | 0.658777  | 1.016480  | 2.777447  |
| 38 | 1 | -2.410638 | 3.728373  | 0.945398  |
| 39 | 1 | -2.457340 | 3.232503  | -0.752467 |
| 40 | 1 | -0.905017 | 3.396162  | 0.075795  |
| 41 | 1 | -5.116560 | 1.206471  | -0.005682 |
| 42 | 1 | -4.472464 | 0.056050  | -1.191573 |
| 43 | 1 | -4.039930 | 1.766037  | -1.294464 |
| 44 | 1 | -4.618991 | -1.519588 | 1.681802  |
| 45 | 1 | -3.234153 | -2.596366 | 1.446240  |
| 46 | 1 | -4.088314 | -1.942057 | 0.043886  |
| 47 | 1 | -1.523287 | -1.022940 | 3.886233  |
| 48 | 1 | -0.033319 | -1.234631 | 2.955587  |
| 49 | 1 | -1.406779 | -2.312189 | 2.679704  |
| 50 | 1 | -0.343721 | -3.097342 | -0.600696 |
| 51 | 1 | 0.914519  | -3.344352 | 0.632117  |
| 52 | 1 | 0.813728  | 1.286475  | -3.637460 |
| 53 | 1 | -0.797971 | 0.598958  | -3.304757 |
| 54 | 1 | 1.358984  | -3.214584 | -1.089309 |
| 55 | 1 | -0.461175 | 2.294789  | -2.898700 |

TS22<sup>Me</sup>-13<sup>Me</sup> (E = -963.462804 a.u.)

| Center Number | Atomic Number | Coordinates (Angstroms) |           |           |
|---------------|---------------|-------------------------|-----------|-----------|
|               |               | X                       | Y         | Z         |
| 1             | 22            | -0.655673               | -0.204751 | -0.395428 |
| 2             | 7             | 0.845775                | 0.916023  | -1.269959 |
| 3             | 6             | 2.018665                | 0.760532  | -0.693964 |
| 4             | 7             | 0.583714                | -1.846645 | 0.008296  |
| 5             | 6             | -2.032597               | 1.515260  | 0.446034  |
| 6             | 6             | -1.469524               | 0.836641  | 1.569134  |
| 7             | 6             | -2.895548               | 0.609091  | -0.241520 |
| 8             | 17            | -1.171122               | -1.139966 | -2.583723 |
| 9             | 6             | -1.976354               | -0.501005 | 1.556072  |
| 10            | 6             | -2.861725               | -0.635080 | 0.446506  |
| 11            | 6             | 0.784843                | 1.637942  | -2.550756 |
| 12            | 6             | 1.773589                | -1.477068 | 0.400244  |
| 13            | 6             | 0.280209                | -3.277818 | -0.158350 |
| 14            | 6             | 2.079616                | -0.050463 | 0.508732  |
| 15            | 1             | 2.912511                | 1.218284  | -1.118147 |
| 16            | 6             | 3.316244                | 0.004903  | 1.366455  |
| 17            | 1             | 0.741321                | 0.292873  | 0.874444  |
| 18            | 6             | 2.896019                | -2.292645 | 0.987509  |
| 19            | 6             | 3.763009                | -1.235316 | 1.649346  |
| 20            | 1             | 2.518815                | -3.040676 | 1.695973  |
| 21            | 1             | 3.462877                | -2.847942 | 0.226525  |
| 22            | 6             | 4.962817                | -1.648750 | 2.457083  |
| 23            | 6             | 3.899508                | 1.322924  | 1.802856  |
| 24            | 1             | 4.804180                | 1.195746  | 2.404479  |
| 25            | 1             | 3.171471                | 1.890976  | 2.397722  |
| 26            | 1             | 4.158395                | 1.948928  | 0.938491  |
| 27            | 1             | 5.501181                | -0.788828 | 2.866444  |
| 28            | 1             | 5.669949                | -2.225558 | 1.843778  |
| 29            | 1             | 4.672422                | -2.294874 | 3.298032  |
| 30            | 6             | -0.733286               | 1.491192  | 2.712409  |
| 31            | 6             | -1.833857               | 2.977400  | 0.121121  |
| 32            | 6             | -3.776476               | 0.924035  | -1.423747 |
| 33            | 6             | -3.673165               | -1.851164 | 0.074837  |
| 34            | 6             | -1.711610               | -1.536011 | 2.623282  |
| 35            | 1             | -1.449413               | 1.915138  | 3.432848  |
| 36            | 1             | -0.089541               | 2.306210  | 2.366796  |
| 37            | 1             | -0.103561               | 0.776282  | 3.250551  |
| 38            | 1             | -2.551260               | 3.599293  | 0.675615  |

|    |   |           |           |           |
|----|---|-----------|-----------|-----------|
| 39 | 1 | -1.982627 | 3.182384  | -0.944239 |
| 40 | 1 | -0.827532 | 3.316223  | 0.388470  |
| 41 | 1 | -4.809648 | 1.104382  | -1.093536 |
| 42 | 1 | -3.787209 | 0.099764  | -2.142891 |
| 43 | 1 | -3.439474 | 1.820330  | -1.953977 |
| 44 | 1 | -4.721205 | -1.724701 | 0.381826  |
| 45 | 1 | -3.296138 | -2.755676 | 0.562608  |
| 46 | 1 | -3.659000 | -2.022164 | -1.006542 |
| 47 | 1 | -2.379111 | -1.384375 | 3.483662  |
| 48 | 1 | -0.681761 | -1.480483 | 2.991552  |
| 49 | 1 | -1.880059 | -2.552808 | 2.254979  |
| 50 | 1 | -0.501247 | -3.386130 | -0.912743 |
| 51 | 1 | -0.074658 | -3.708848 | 0.786580  |
| 52 | 1 | 1.720109  | 2.178327  | -2.743714 |
| 53 | 1 | 0.594966  | 0.929666  | -3.362702 |
| 54 | 1 | 1.161012  | -3.839444 | -0.489657 |
| 55 | 1 | -0.039312 | 2.357782  | -2.532061 |

TS10<sup>Me</sup>-24<sup>Me</sup> (E = -963.4858526 a.u.)

| Center Number | Atomic Number | Coordinates (Angstroms) |           |           |
|---------------|---------------|-------------------------|-----------|-----------|
|               |               | X                       | Y         | Z         |
| 1             | 22            | -0.189399               | -0.471367 | 0.152911  |
| 2             | 7             | 1.661081                | 0.244479  | -0.172515 |
| 3             | 6             | 1.655828                | 0.631854  | -1.433792 |
| 4             | 7             | -1.479966               | 0.706733  | -0.840758 |
| 5             | 6             | -0.331235               | -2.397446 | -1.187458 |
| 6             | 6             | -1.660261               | -2.281963 | -0.664714 |
| 7             | 6             | 0.548784                | -2.704457 | -0.103944 |
| 8             | 17            | -0.571188               | 0.412951  | 2.324400  |
| 9             | 6             | -1.592714               | -2.429403 | 0.735441  |
| 10            | 6             | -0.222176               | -2.673475 | 1.089439  |
| 11            | 6             | -0.583624               | 1.675835  | -0.997858 |
| 12            | 6             | 0.600195                | 1.565033  | -1.947961 |
| 13            | 1             | 2.476540                | 0.338965  | -2.097053 |
| 14            | 6             | 1.100071                | 3.002327  | -2.078106 |
| 15            | 1             | 0.236263                | 1.195087  | -2.918499 |
| 16            | 6             | -0.697317               | 3.111546  | -0.520980 |
| 17            | 6             | 0.386982                | 3.829682  | -1.298842 |
| 18            | 1             | -1.691223               | 3.535026  | -0.723413 |
| 19            | 1             | -0.546991               | 3.201194  | 0.563750  |
| 20            | 6             | 0.539468                | 5.318053  | -1.136996 |
| 21            | 6             | 2.237747                | 3.333877  | -3.006698 |
| 22            | 1             | 2.484660                | 4.399368  | -2.991091 |
| 23            | 1             | 1.988780                | 3.061132  | -4.042334 |
| 24            | 1             | 3.146835                | 2.779018  | -2.738767 |
| 25            | 1             | 1.360028                | 5.725254  | -1.734618 |
| 26            | 1             | 0.727028                | 5.571902  | -0.084096 |
| 27            | 1             | -0.383971               | 5.838147  | -1.428473 |
| 28            | 6             | -2.888005               | -2.131282 | -1.524192 |
| 29            | 6             | 0.008848                | -2.456180 | -2.658860 |
| 30            | 6             | 1.969251                | -3.192421 | -0.249176 |
| 31            | 6             | 0.257819                | -3.007863 | 2.479892  |
| 32            | 6             | -2.735158               | -2.412018 | 1.719055  |
| 33            | 1             | -3.008567               | -3.011049 | -2.171288 |
| 34            | 1             | -2.819862               | -1.250601 | -2.173954 |
| 35            | 1             | -3.798539               | -2.041492 | -0.924146 |
| 36            | 1             | -0.220480               | -3.451821 | -3.068774 |
| 37            | 1             | 1.071210                | -2.264475 | -2.838777 |
| 38            | 1             | -0.565823               | -1.724289 | -3.236618 |
| 39            | 1             | 1.974507                | -4.255645 | -0.529738 |
| 40            | 1             | 2.533185                | -3.101179 | 0.683637  |
| 41            | 1             | 2.516089                | -2.650394 | -1.028179 |
| 42            | 1             | 0.029112                | -4.055186 | 2.726037  |
| 43            | 1             | -0.223004               | -2.372373 | 3.229737  |
| 44            | 1             | 1.340224                | -2.875366 | 2.580201  |

|    |   |           |           |           |
|----|---|-----------|-----------|-----------|
| 45 | 1 | -2.906905 | -3.416591 | 2.130811  |
| 46 | 1 | -3.668525 | -2.082894 | 1.251622  |
| 47 | 1 | -2.526099 | -1.739684 | 2.558539  |
| 48 | 6 | 2.947345  | -0.112256 | 0.442938  |
| 49 | 6 | -2.835433 | 1.064615  | -0.388850 |
| 50 | 1 | 2.791411  | -0.800630 | 1.274114  |
| 51 | 1 | 3.636748  | -0.561944 | -0.284056 |
| 52 | 1 | 3.408481  | 0.801701  | 0.836000  |
| 53 | 1 | -3.403726 | 0.152704  | -0.208058 |
| 54 | 1 | -2.810641 | 1.639612  | 0.545426  |
| 55 | 1 | -3.351893 | 1.656029  | -1.156759 |

$^{24}\text{Me}$  (E = -963.5050994 a.u.)

| Center Number | Atomic Number | Coordinates (Angstroms) |           |           |
|---------------|---------------|-------------------------|-----------|-----------|
|               |               | X                       | Y         | Z         |
| 1             | 22            | 0.202102                | -0.727763 | -0.455446 |
| 2             | 7             | -1.460439               | 0.754897  | -0.352983 |
| 3             | 6             | -1.125105               | 1.925314  | 0.041850  |
| 4             | 7             | 1.564361                | 0.061777  | 0.541064  |
| 5             | 6             | 0.062363                | -2.375531 | 1.288625  |
| 6             | 6             | 0.873803                | -2.935839 | 0.262220  |
| 7             | 6             | -1.261546               | -2.235026 | 0.775888  |
| 8             | 17            | 0.452195                | -0.649739 | -2.824689 |
| 9             | 6             | 0.045393                | -3.149649 | -0.877803 |
| 10            | 6             | -1.271075               | -2.716774 | -0.566427 |
| 11            | 6             | 1.201302                | 1.136591  | -0.265481 |
| 12            | 6             | 0.307167                | 2.251571  | 0.315240  |
| 13            | 1             | -1.891023               | 2.702131  | 0.139900  |
| 14            | 6             | 0.766677                | 3.525704  | -0.386445 |
| 15            | 1             | 0.417417                | 2.366401  | 1.410459  |
| 16            | 6             | 2.192390                | 1.812393  | -1.215438 |
| 17            | 6             | 1.794697                | 3.269869  | -1.211339 |
| 18            | 1             | 3.236118                | 1.703672  | -0.877420 |
| 19            | 1             | 2.157912                | 1.392767  | -2.227788 |
| 20            | 6             | 2.552733                | 4.248489  | -2.069055 |
| 21            | 6             | 0.120860                | 4.853582  | -0.079243 |
| 22            | 1             | 0.620658                | 5.679915  | -0.593566 |
| 23            | 1             | 0.152772                | 5.062506  | 1.000020  |
| 24            | 1             | -0.936808               | 4.876378  | -0.377420 |
| 25            | 1             | 2.184548                | 5.274368  | -1.972614 |
| 26            | 1             | 2.483682                | 3.961206  | -3.127398 |
| 27            | 1             | 3.620774                | 4.244121  | -1.809429 |
| 28            | 6             | 2.309726                | -3.394218 | 0.369304  |
| 29            | 6             | 0.426782                | -2.153973 | 2.736836  |
| 30            | 6             | -2.447499               | -1.866131 | 1.638106  |
| 31            | 6             | -2.458432               | -2.885459 | -1.483493 |
| 32            | 6             | 0.455730                | -3.866119 | -2.137451 |
| 33            | 1             | 2.367236                | -4.489664 | 0.304499  |
| 34            | 1             | 2.760532                | -3.099604 | 1.320814  |
| 35            | 1             | 2.934843                | -2.986979 | -0.433874 |
| 36            | 1             | -0.142939               | -2.840740 | 3.379143  |
| 37            | 1             | 0.206923                | -1.133769 | 3.071591  |
| 38            | 1             | 1.487194                | -2.342231 | 2.922436  |
| 39            | 1             | -2.499479               | -2.537897 | 2.505887  |
| 40            | 1             | -3.392225               | -1.970565 | 1.096497  |
| 41            | 1             | -2.390807               | -0.842919 | 2.030274  |
| 42            | 1             | -2.640596               | -3.950409 | -1.682726 |
| 43            | 1             | -2.294682               | -2.397406 | -2.451849 |
| 44            | 1             | -3.374315               | -2.474868 | -1.048504 |
| 45            | 1             | 0.262098                | -4.944976 | -2.039297 |
| 46            | 1             | 1.521555                | -3.735853 | -2.347956 |
| 47            | 1             | -0.096040               | -3.498189 | -3.006376 |
| 48            | 6             | -2.853577               | 0.545204  | -0.785942 |
| 49            | 6             | 2.697526                | 0.058285  | 1.453665  |
| 50            | 1             | -3.432672               | 1.474782  | -0.731407 |



|    |   |           |           |           |
|----|---|-----------|-----------|-----------|
| 51 | 1 | -3.335044 | -0.212958 | -0.169608 |
| 52 | 1 | -2.843404 | 0.193141  | -1.821100 |
| 53 | 1 | 2.524760  | 0.746371  | 2.295803  |
| 54 | 1 | 2.872343  | -0.939926 | 1.857234  |
| 55 | 1 | 3.613368  | 0.384722  | 0.939363  |

**TS24<sup>Me</sup>-25<sup>Me</sup>** (E = -963.4851424 a.u.)

| Center Number | Atomic Number | Coordinates (Angstroms) |           |           |
|---------------|---------------|-------------------------|-----------|-----------|
|               |               | X                       | Y         | Z         |
| 1             | 22            | -0.681196               | 0.166012  | -0.402093 |
| 2             | 7             | -0.143331               | 2.045823  | -0.205379 |
| 3             | 6             | 0.882696                | 1.433184  | -0.725734 |
| 4             | 7             | 0.896281                | -1.220959 | -0.389635 |
| 5             | 6             | -1.651199               | -0.082850 | 1.706568  |
| 6             | 6             | -1.653381               | -1.412731 | 1.176749  |
| 7             | 6             | -2.611099               | 0.684792  | 0.973250  |
| 8             | 17            | -1.246340               | -0.028519 | -2.684672 |
| 9             | 6             | -2.541027               | -1.438320 | 0.073817  |
| 10            | 6             | -3.135744               | -0.140573 | -0.046999 |
| 11            | 6             | 2.060804                | -0.778130 | 0.036556  |
| 12            | 6             | 2.239207                | 0.483495  | 0.667890  |
| 13            | 1             | 1.628902                | 1.891391  | -1.373354 |
| 14            | 6             | 3.691609                | 0.738915  | 0.732303  |
| 15            | 1             | 1.597090                | 0.831904  | 1.466387  |
| 16            | 6             | 3.423167                | -1.367833 | -0.271002 |
| 17            | 6             | 4.382729                | -0.286333 | 0.181287  |
| 18            | 1             | 3.585530                | -2.309213 | 0.274341  |
| 19            | 1             | 3.521946                | -1.612913 | -1.336108 |
| 20            | 6             | 5.867445                | -0.454250 | 0.008157  |
| 21            | 6             | 4.239316                | 2.001579  | 1.345390  |
| 22            | 1             | 5.333200                | 2.024545  | 1.342490  |
| 23            | 1             | 3.902458                | 2.105364  | 2.386417  |
| 24            | 1             | 3.881012                | 2.887906  | 0.804195  |
| 25            | 1             | 6.424784                | 0.398354  | 0.409086  |
| 26            | 1             | 6.139458                | -0.559643 | -1.052461 |
| 27            | 1             | 6.228549                | -1.359361 | 0.518777  |
| 28            | 6             | -0.944127               | -2.586106 | 1.804588  |
| 29            | 6             | -0.954541               | 0.351042  | 2.975430  |
| 30            | 6             | -3.105154               | 2.060068  | 1.342751  |
| 31            | 6             | -4.226652               | 0.212309  | -1.022634 |
| 32            | 6             | -2.930953               | -2.623237 | -0.773404 |
| 33            | 1             | -1.478112               | -2.906120 | 2.710393  |
| 34            | 1             | 0.081415                | -2.337364 | 2.095944  |
| 35            | 1             | -0.898999               | -3.445089 | 1.129993  |
| 36            | 1             | -1.594968               | 0.168708  | 3.850823  |
| 37            | 1             | -0.714065               | 1.419368  | 2.963570  |
| 38            | 1             | -0.021899               | -0.200095 | 3.135675  |
| 39            | 1             | -3.980362               | 1.979270  | 2.003239  |
| 40            | 1             | -3.412506               | 2.637974  | 0.465246  |
| 41            | 1             | -2.345499               | 2.635611  | 1.878514  |
| 42            | 1             | -5.181197               | -0.233960 | -0.707791 |
| 43            | 1             | -3.995654               | -0.158884 | -2.026076 |
| 44            | 1             | -4.372993               | 1.294456  | -1.093287 |
| 45            | 1             | -3.991712               | -2.868285 | -0.624561 |
| 46            | 1             | -2.351696               | -3.516070 | -0.519235 |
| 47            | 1             | -2.788878               | -2.414738 | -1.840529 |
| 48            | 6             | -0.331668               | 3.480073  | 0.011385  |
| 49            | 6             | 0.848230                | -2.536253 | -1.047720 |
| 50            | 1             | -1.384981               | 3.747901  | -0.087835 |
| 51            | 1             | 0.006217                | 3.763539  | 1.017099  |
| 52            | 1             | 0.252334                | 4.048243  | -0.723403 |
| 53            | 1             | 1.371930                | -2.499206 | -2.012170 |
| 54            | 1             | -0.187649               | -2.806856 | -1.249103 |
| 55            | 1             | 1.304885                | -3.323510 | -0.433582 |

**25<sup>Me</sup>** (E = -963.515535 a.u.)

| Center Number | Atomic Number | Coordinates (Angstroms) |           |           |
|---------------|---------------|-------------------------|-----------|-----------|
|               |               | X                       | Y         | Z         |
| 1             | 22            | -0.647766               | -0.093770 | -0.236420 |
| 2             | 7             | 0.318391                | 1.485469  | -0.597003 |
| 3             | 6             | 1.596531                | 0.854745  | -0.616106 |
| 4             | 7             | 0.602318                | -0.896409 | 0.929919  |
| 5             | 6             | -2.218228               | 0.108030  | 1.553920  |
| 6             | 6             | -2.592743               | -1.049787 | 0.814592  |
| 7             | 6             | -2.388369               | 1.246402  | 0.707619  |
| 8             | 17            | -0.376495               | -1.284472 | -2.274218 |
| 9             | 6             | -2.976508               | -0.628625 | -0.489895 |
| 10            | 6             | -2.853446               | 0.790768  | -0.556752 |
| 11            | 6             | 1.764117                | -0.432453 | 0.239623  |
| 12            | 6             | 2.507471                | 0.848559  | 0.613296  |
| 13            | 1             | 2.098990                | 0.823977  | -1.584750 |
| 14            | 6             | 3.950783                | 0.580356  | 0.333829  |
| 15            | 1             | 2.192106                | 1.447401  | 1.461434  |
| 16            | 6             | 2.819094                | -1.408909 | -0.293507 |
| 17            | 6             | 4.126258                | -0.644251 | -0.197671 |
| 18            | 1             | 2.851442                | -2.325136 | 0.309165  |
| 19            | 1             | 2.584868                | -1.721492 | -1.316196 |
| 20            | 6             | 5.401200                | -1.280722 | -0.682330 |
| 21            | 6             | 4.982942                | 1.644437  | 0.602708  |
| 22            | 1             | 5.997902                | 1.303861  | 0.376966  |
| 23            | 1             | 4.957829                | 1.953595  | 1.656964  |
| 24            | 1             | 4.785285                | 2.543610  | 0.002305  |
| 25            | 1             | 6.273648                | -0.639713 | -0.522737 |
| 26            | 1             | 5.344399                | -1.510638 | -1.755574 |
| 27            | 1             | 5.581889                | -2.233452 | -0.163906 |
| 28            | 6             | -2.685273               | -2.471745 | 1.313809  |
| 29            | 6             | -1.899777               | 0.202608  | 3.025728  |
| 30            | 6             | -2.267330               | 2.671116  | 1.188094  |
| 31            | 6             | -3.241448               | 1.631272  | -1.748836 |
| 32            | 6             | -3.578499               | -1.511349 | -1.551391 |
| 33            | 1             | -3.736962               | -2.782723 | 1.379699  |
| 34            | 1             | -2.249285               | -2.584382 | 2.310111  |
| 35            | 1             | -2.178272               | -3.175700 | 0.644473  |
| 36            | 1             | -2.714325               | 0.720319  | 3.551493  |
| 37            | 1             | -0.979045               | 0.765724  | 3.213570  |
| 38            | 1             | -1.790251               | -0.782241 | 3.486247  |
| 39            | 1             | -3.028997               | 2.871116  | 1.954646  |
| 40            | 1             | -2.424756               | 3.389661  | 0.379768  |
| 41            | 1             | -1.288716               | 2.875171  | 1.635577  |
| 42            | 1             | -4.334447               | 1.660627  | -1.858300 |
| 43            | 1             | -2.828931               | 1.227371  | -2.679863 |
| 44            | 1             | -2.893772               | 2.663525  | -1.650680 |
| 45            | 1             | -4.666094               | -1.584928 | -1.403178 |
| 46            | 1             | -3.164495               | -2.523001 | -1.519678 |
| 47            | 1             | -3.398945               | -1.117055 | -2.554728 |
| 48            | 6             | 0.310617                | 2.868819  | -1.048289 |
| 49            | 6             | 0.838784                | -1.635231 | 2.162355  |
| 50            | 1             | -0.709753               | 3.250753  | -1.082752 |
| 51            | 1             | 0.739924                | 2.948489  | -2.059400 |
| 52            | 1             | 0.903750                | 3.511987  | -0.379777 |
| 53            | 1             | -0.106441               | -1.993969 | 2.568095  |
| 54            | 1             | 1.329321                | -1.001747 | 2.918341  |
| 55            | 1             | 1.481392                | -2.509720 | 1.990417  |

**1<sup>Ft</sup>** (E = -869.9811052 a.u.)

| Center Number | Atomic Number | Coordinates (Angstroms) |   |   |
|---------------|---------------|-------------------------|---|---|
|               |               | X                       | Y | Z |

|    |    |           |           |           |
|----|----|-----------|-----------|-----------|
| 1  | 22 | 0.202229  | 0.330779  | 0.070231  |
| 2  | 7  | -2.958169 | 0.773369  | -0.764510 |
| 3  | 6  | 1.817952  | -1.488757 | 0.130613  |
| 4  | 6  | 1.083075  | -1.700632 | -1.068461 |
| 5  | 6  | 0.911147  | -1.648376 | 1.225796  |
| 6  | 17 | -0.485121 | 0.941524  | 2.341229  |
| 7  | 6  | -0.275135 | -1.939919 | -0.722153 |
| 8  | 6  | -0.378064 | -1.930549 | 0.701400  |
| 9  | 6  | -1.836145 | 0.599622  | -0.500954 |
| 10 | 6  | 0.605303  | 1.135607  | -2.012536 |
| 11 | 6  | 1.643796  | 1.626137  | -1.145420 |
| 12 | 1  | -0.175386 | 1.812361  | -2.347934 |
| 13 | 6  | -0.115241 | 2.849931  | -0.025231 |
| 14 | 6  | 1.229957  | 2.512803  | -0.107576 |
| 15 | 1  | -0.489490 | 3.346156  | 0.859350  |
| 16 | 1  | -0.738241 | 2.906343  | -0.904480 |
| 17 | 6  | 2.200796  | 2.988992  | 0.958248  |
| 18 | 6  | 3.115462  | 1.443833  | -1.465864 |
| 19 | 1  | 3.742533  | 1.310262  | -0.579678 |
| 20 | 1  | 3.482439  | 2.336452  | -1.996050 |
| 21 | 1  | 3.273680  | 0.591436  | -2.130418 |
| 22 | 1  | 2.803685  | 3.821187  | 0.567107  |
| 23 | 1  | 2.893810  | 2.205675  | 1.283222  |
| 24 | 1  | 1.656591  | 3.348101  | 1.835575  |
| 25 | 6  | 1.661323  | -1.922906 | -2.442188 |
| 26 | 6  | 3.320199  | -1.444564 | 0.277958  |
| 27 | 6  | 1.326932  | -1.730138 | 2.672332  |
| 28 | 6  | -1.603128 | -2.267329 | 1.511109  |
| 29 | 6  | -1.357580 | -2.333181 | -1.697619 |
| 30 | 1  | 1.923684  | -2.984737 | -2.560274 |
| 31 | 1  | 2.571740  | -1.343847 | -2.617353 |
| 32 | 1  | 0.947405  | -1.675509 | -3.233817 |
| 33 | 1  | 3.692470  | -2.419756 | 0.624671  |
| 34 | 1  | 3.644163  | -0.697804 | 1.011561  |
| 35 | 1  | 3.818258  | -1.221373 | -0.668227 |
| 36 | 1  | 1.755955  | -2.722315 | 2.878966  |
| 37 | 1  | 0.480554  | -1.575242 | 3.343792  |
| 38 | 1  | 2.085435  | -0.982219 | 2.924961  |
| 39 | 1  | -1.598333 | -3.329937 | 1.793860  |
| 40 | 1  | -2.524078 | -2.080104 | 0.949696  |
| 41 | 1  | -1.645700 | -1.670884 | 2.426750  |
| 42 | 1  | -1.248080 | -3.388468 | -1.986212 |
| 43 | 1  | -1.316577 | -1.734895 | -2.614223 |
| 44 | 1  | -2.354973 | -2.213882 | -1.265005 |
| 45 | 1  | 0.924046  | 0.464018  | -2.800157 |
| 46 | 6  | -4.356359 | 1.025758  | -1.003745 |
| 47 | 1  | -4.571566 | 0.748270  | -2.040862 |
| 48 | 1  | -4.517457 | 2.104608  | -0.907484 |
| 49 | 6  | -5.254336 | 0.250890  | -0.030008 |
| 50 | 1  | -5.037352 | 0.530180  | 1.004942  |
| 51 | 1  | -6.302462 | 0.484358  | -0.241700 |
| 52 | 1  | -5.111261 | -0.828393 | -0.139185 |

TS1<sup>E<sub>t</sub></sup>-3<sup>E<sub>t</sub></sup> (E = -869.977135 a.u.)

| Center Number | Atomic Number | Coordinates (Angstroms) |           |           |
|---------------|---------------|-------------------------|-----------|-----------|
|               |               | X                       | Y         | Z         |
| 1             | 22            | -1.144079               | -0.556523 | -0.643137 |
| 2             | 7             | -3.158742               | 1.334027  | -2.322893 |
| 3             | 6             | 1.232412                | -1.099572 | -0.863065 |
| 4             | 6             | 1.099271                | -0.300481 | 0.300333  |
| 5             | 6             | 0.838061                | -0.314696 | -1.986898 |
| 6             | 17            | -1.529914               | -2.361587 | -2.226805 |
| 7             | 6             | 0.613732                | 0.986521  | -0.099491 |
| 8             | 6             | 0.462090                | 0.976143  | -1.514958 |
| 9             | 6             | -2.523699               | 0.584673  | -1.633930 |

|    |   |           |           |           |
|----|---|-----------|-----------|-----------|
| 10 | 6 | -1.817318 | 0.190198  | 1.373596  |
| 11 | 6 | -2.057834 | -1.223141 | 1.435718  |
| 12 | 1 | -2.653579 | 0.862363  | 1.197464  |
| 13 | 6 | -3.573866 | -0.800651 | -0.411512 |
| 14 | 6 | -2.910273 | -1.747767 | 0.458547  |
| 15 | 1 | -4.153355 | -1.245704 | -1.213190 |
| 16 | 1 | -4.062138 | 0.041080  | 0.075363  |
| 17 | 6 | -3.251517 | -3.219964 | 0.376856  |
| 18 | 6 | -1.439857 | -2.101522 | 2.507583  |
| 19 | 1 | -0.991821 | -3.017938 | 2.108683  |
| 20 | 1 | -2.217996 | -2.404689 | 3.222790  |
| 21 | 1 | -0.675645 | -1.558868 | 3.067633  |
| 22 | 1 | -4.050527 | -3.452660 | 1.097157  |
| 23 | 1 | -2.396773 | -3.863693 | 0.604177  |
| 24 | 1 | -3.606961 | -3.478022 | -0.622853 |
| 25 | 6 | 1.604843  | -0.658014 | 1.674954  |
| 26 | 6 | 1.777387  | -2.503660 | -0.926565 |
| 27 | 6 | 0.984929  | -0.699269 | -3.435211 |
| 28 | 6 | 0.175618  | 2.181075  | -2.376388 |
| 29 | 6 | 0.545538  | 2.229068  | 0.753591  |
| 30 | 1 | 2.659155  | -0.361558 | 1.773674  |
| 31 | 1 | 1.549224  | -1.733340 | 1.867736  |
| 32 | 1 | 1.051022  | -0.144772 | 2.466644  |
| 33 | 1 | 2.843761  | -2.490866 | -1.193961 |
| 34 | 1 | 1.248440  | -3.099615 | -1.675950 |
| 35 | 1 | 1.685550  | -3.017811 | 0.035550  |
| 36 | 1 | 1.950081  | -0.339521 | -3.821866 |
| 37 | 1 | 0.193719  | -0.264301 | -4.053754 |
| 38 | 1 | 0.945174  | -1.782106 | -3.569296 |
| 39 | 1 | 1.114792  | 2.695472  | -2.627415 |
| 40 | 1 | -0.471584 | 2.901135  | -1.867051 |
| 41 | 1 | -0.313640 | 1.904134  | -3.314258 |
| 42 | 1 | 1.411394  | 2.875014  | 0.547887  |
| 43 | 1 | 0.560865  | 1.994114  | 1.821206  |
| 44 | 1 | -0.357634 | 2.816079  | 0.554316  |
| 45 | 1 | -1.112203 | 0.587776  | 2.092339  |
| 46 | 6 | -4.566704 | 1.630177  | -2.600261 |
| 47 | 1 | -4.749780 | 2.657982  | -2.268514 |
| 48 | 1 | -5.208107 | 0.961728  | -2.013621 |
| 49 | 6 | -4.864281 | 1.498976  | -4.097940 |
| 50 | 1 | -4.684233 | 0.475829  | -4.442629 |
| 51 | 1 | -5.912755 | 1.749912  | -4.289547 |
| 52 | 1 | -4.232244 | 2.176461  | -4.680485 |

**3<sup>Et</sup>** (E = -870.0144956 a.u.)

| Center Number | Atomic Number | Coordinates (Angstroms) |           |           |
|---------------|---------------|-------------------------|-----------|-----------|
|               |               | X                       | Y         | Z         |
| 1             | 22            | 0.246369                | -0.083200 | -0.283007 |
| 2             | 7             | -0.833011               | 1.642537  | 0.019354  |
| 3             | 6             | 2.583550                | 0.402816  | -0.211290 |
| 4             | 6             | 2.444897                | -1.002979 | -0.412172 |
| 5             | 6             | 2.056503                | 0.718705  | 1.072296  |
| 6             | 17            | 0.002445                | -0.038563 | -2.615035 |
| 7             | 6             | 1.829588                | -1.554795 | 0.747592  |
| 8             | 6             | 1.574224                | -0.484997 | 1.661486  |
| 9             | 6             | -1.210436               | 0.746763  | 0.827296  |
| 10            | 6             | -1.145430               | -1.726743 | 0.104519  |
| 11            | 6             | -2.594526               | -1.417189 | -0.142896 |
| 12            | 1             | -0.983907               | -1.991201 | 1.152976  |
| 13            | 6             | -2.494422               | 0.452632  | 1.518123  |
| 14            | 6             | -3.259425               | -0.459709 | 0.545041  |
| 15            | 1             | -3.083562               | 1.352397  | 1.731378  |
| 16            | 1             | -2.297552               | -0.049222 | 2.472965  |
| 17            | 6             | -4.736044               | -0.138303 | 0.446570  |
| 18            | 6             | -3.241477               | -2.269485 | -1.219656 |

|    |   |           |           |           |
|----|---|-----------|-----------|-----------|
| 19 | 1 | -4.251922 | -1.953115 | -1.489321 |
| 20 | 1 | -3.283384 | -3.322082 | -0.906214 |
| 21 | 1 | -2.624355 | -2.230758 | -2.126856 |
| 22 | 1 | -5.215279 | -0.216467 | 1.433847  |
| 23 | 1 | -5.271890 | -0.807059 | -0.230321 |
| 24 | 1 | -4.897776 | 0.892981  | 0.098234  |
| 25 | 6 | 2.954835  | -1.777841 | -1.601167 |
| 26 | 6 | 3.235975  | 1.364051  | -1.173637 |
| 27 | 6 | 2.077058  | 2.073154  | 1.734709  |
| 28 | 6 | 1.053584  | -0.639700 | 3.068586  |
| 29 | 6 | 1.656802  | -3.023683 | 1.037369  |
| 30 | 1 | 4.011329  | -2.047461 | -1.459768 |
| 31 | 1 | 2.876033  | -1.195867 | -2.523703 |
| 32 | 1 | 2.393548  | -2.705595 | -1.749649 |
| 33 | 1 | 4.326115  | 1.369791  | -1.031499 |
| 34 | 1 | 2.879878  | 2.388850  | -1.028611 |
| 35 | 1 | 3.036535  | 1.087145  | -2.213114 |
| 36 | 1 | 2.964027  | 2.171053  | 2.376345  |
| 37 | 1 | 1.196200  | 2.231988  | 2.365297  |
| 38 | 1 | 2.109875  | 2.882728  | 1.000101  |
| 39 | 1 | 1.861932  | -0.946806 | 3.747521  |
| 40 | 1 | 0.267615  | -1.399589 | 3.132135  |
| 41 | 1 | 0.641078  | 0.298827  | 3.451723  |
| 42 | 1 | 2.574953  | -3.431190 | 1.483867  |
| 43 | 1 | 1.449694  | -3.598641 | 0.129201  |
| 44 | 1 | 0.839355  | -3.209567 | 1.740058  |
| 45 | 1 | -0.815177 | -2.568493 | -0.513040 |
| 46 | 6 | -1.491938 | 2.878905  | -0.441774 |
| 47 | 1 | -2.336744 | 3.110647  | 0.219463  |
| 48 | 1 | -1.889701 | 2.665524  | -1.441249 |
| 49 | 6 | -0.510877 | 4.051853  | -0.508789 |
| 50 | 1 | 0.332691  | 3.811390  | -1.163933 |
| 51 | 1 | -1.013844 | 4.938449  | -0.909241 |
| 52 | 1 | -0.121021 | 4.298835  | 0.484453  |

$4^{\text{Et}}$  (E = -870.0077525 a.u.)

| Center Number | Atomic Number | Coordinates (Angstroms) |           |           |
|---------------|---------------|-------------------------|-----------|-----------|
|               |               | X                       | Y         | Z         |
| 1             | 22            | 0.193135                | 0.011469  | -0.192439 |
| 2             | 7             | -0.438666               | 1.895492  | 0.241104  |
| 3             | 6             | 2.026169                | -1.655797 | -0.173585 |
| 4             | 6             | 1.669267                | -1.370673 | 1.171047  |
| 5             | 6             | 2.541467                | -0.459853 | -0.756759 |
| 6             | 17            | -0.244033               | -0.510696 | -2.439425 |
| 7             | 6             | 1.916539                | 0.016771  | 1.406312  |
| 8             | 6             | 2.476700                | 0.572419  | 0.215418  |
| 9             | 6             | -1.417543               | 1.153528  | -0.079740 |
| 10            | 6             | -0.431546               | 3.285573  | 0.742511  |
| 11            | 6             | -1.329559               | -1.148769 | 0.898962  |
| 12            | 6             | -2.772860               | -1.205754 | 0.443118  |
| 13            | 1             | -1.266920               | -0.732217 | 1.915886  |
| 14            | 6             | -2.886926               | 1.244553  | -0.053174 |
| 15            | 6             | -3.508357               | -0.138467 | 0.071073  |
| 16            | 1             | -3.235710               | 1.926562  | 0.739586  |
| 17            | 1             | -3.215333               | 1.702365  | -0.998410 |
| 18            | 6             | -4.983150               | -0.138859 | -0.276262 |
| 19            | 6             | -3.336708               | -2.618579 | 0.463790  |
| 20            | 1             | -4.359530               | -2.696377 | 0.088637  |
| 21            | 1             | -3.313239               | -3.030374 | 1.482643  |
| 22            | 1             | -2.705471               | -3.270374 | -0.155988 |
| 23            | 1             | -5.471844               | -1.099792 | -0.107039 |
| 24            | 1             | -5.135838               | 0.136723  | -1.330969 |
| 25            | 1             | -5.518412               | 0.611430  | 0.325183  |
| 26            | 6             | 1.298241                | -2.374455 | 2.231755  |
| 27            | 6             | 1.963162                | -2.995803 | -0.861489 |

|    |   |           |           |           |
|----|---|-----------|-----------|-----------|
| 28 | 6 | 3.145360  | -0.350251 | -2.132649 |
| 29 | 6 | 3.031312  | 1.966924  | 0.048829  |
| 30 | 6 | 1.787096  | 0.702096  | 2.746486  |
| 31 | 1 | 2.191222  | -2.655131 | 2.808284  |
| 32 | 1 | 0.885520  | -3.292208 | 1.802188  |
| 33 | 1 | 0.562190  | -1.979239 | 2.939475  |
| 34 | 1 | 2.954027  | -3.471436 | -0.885918 |
| 35 | 1 | 1.617443  | -2.893080 | -1.895645 |
| 36 | 1 | 1.280613  | -3.681959 | -0.350165 |
| 37 | 1 | 4.183667  | -0.712366 | -2.123624 |
| 38 | 1 | 3.158794  | 0.684950  | -2.488074 |
| 39 | 1 | 2.587456  | -0.943104 | -2.863296 |
| 40 | 1 | 4.121873  | 1.965073  | 0.186144  |
| 41 | 1 | 2.612059  | 2.661268  | 0.782645  |
| 42 | 1 | 2.829000  | 2.372144  | -0.948539 |
| 43 | 1 | 2.652004  | 0.470378  | 3.384482  |
| 44 | 1 | 0.889797  | 0.378860  | 3.286448  |
| 45 | 1 | 1.740415  | 1.790612  | 2.645115  |
| 46 | 1 | -0.946106 | -2.168341 | 0.970798  |
| 47 | 1 | 0.394238  | 3.385417  | 1.452544  |
| 48 | 1 | -1.369006 | 3.472917  | 1.282458  |
| 49 | 6 | -0.267468 | 4.284587  | -0.411145 |
| 50 | 1 | -0.240295 | 5.307325  | -0.020246 |
| 51 | 1 | 0.661968  | 4.098578  | -0.958694 |
| 52 | 1 | -1.101498 | 4.207306  | -1.116754 |

TS4<sup>Et</sup>-5<sup>Et</sup> (E = -869.9924161 a.u.)

| Center Number | Atomic Number | Coordinates (Angstroms) |           |           |
|---------------|---------------|-------------------------|-----------|-----------|
|               |               | X                       | Y         | Z         |
| 1             | 22            | 0.821120                | -0.113967 | -0.679711 |
| 2             | 7             | -0.315704               | 1.439165  | -0.458980 |
| 3             | 6             | 3.012757                | -1.164343 | -0.529752 |
| 4             | 6             | 2.592618                | -0.795866 | 0.778722  |
| 5             | 6             | 3.177416                | 0.030023  | -1.295356 |
| 6             | 17            | 0.441061                | -1.356603 | -2.656187 |
| 7             | 6             | 2.477286                | 0.627917  | 0.815231  |
| 8             | 6             | 2.851830                | 1.136716  | -0.467155 |
| 9             | 6             | -1.047632               | 0.339634  | -0.511354 |
| 10            | 6             | -0.714165               | 2.804614  | -0.094631 |
| 11            | 6             | -0.705669               | -1.005879 | 0.886067  |
| 12            | 6             | -2.144266               | -1.454741 | 0.963821  |
| 13            | 1             | -0.362596               | -0.577154 | 1.833955  |
| 14            | 6             | -2.510341               | 0.183755  | -0.756824 |
| 15            | 6             | -3.043444               | -0.903286 | 0.136870  |
| 16            | 1             | -3.047962               | 1.126849  | -0.577334 |
| 17            | 1             | -2.665013               | -0.061916 | -1.816869 |
| 18            | 6             | -4.507759               | -1.239870 | 0.004219  |
| 19            | 6             | -2.425051               | -2.544729 | 1.976500  |
| 20            | 1             | -3.482279               | -2.820084 | 2.022747  |
| 21            | 1             | -2.115233               | -2.225332 | 2.981226  |
| 22            | 1             | -1.849281               | -3.450378 | 1.739584  |
| 23            | 1             | -4.830280               | -2.015642 | 0.702774  |
| 24            | 1             | -4.731317               | -1.589490 | -1.013607 |
| 25            | 1             | -5.129296               | -0.349897 | 0.178071  |
| 26            | 6             | 2.460685                | -1.718819 | 1.965747  |
| 27            | 6             | 3.339396                | -2.555037 | -1.012142 |
| 28            | 6             | 3.692436                | 0.090554  | -2.711001 |
| 29            | 6             | 3.002737                | 2.591661  | -0.841383 |
| 30            | 6             | 2.193148                | 1.445881  | 2.052974  |
| 31            | 1             | 3.413068                | -1.777889 | 2.511400  |
| 32            | 1             | 2.193430                | -2.737285 | 1.665117  |
| 33            | 1             | 1.702006                | -1.372702 | 2.675565  |
| 34            | 1             | 4.425003                | -2.727002 | -0.987345 |
| 35            | 1             | 2.997960                | -2.709942 | -2.040318 |
| 36            | 1             | 2.870085                | -3.322181 | -0.388025 |

|    |   |           |           |           |
|----|---|-----------|-----------|-----------|
| 37 | 1 | 4.786561  | -0.016866 | -2.728656 |
| 38 | 1 | 3.446827  | 1.043631  | -3.190100 |
| 39 | 1 | 3.266443  | -0.709345 | -3.324604 |
| 40 | 1 | 4.042023  | 2.920926  | -0.700028 |
| 41 | 1 | 2.368957  | 3.236821  | -0.226306 |
| 42 | 1 | 2.741410  | 2.771372  | -1.889413 |
| 43 | 1 | 3.106832  | 1.565839  | 2.652520  |
| 44 | 1 | 1.442973  | 0.972972  | 2.696540  |
| 45 | 1 | 1.832347  | 2.448369  | 1.805089  |
| 46 | 1 | -0.088936 | -1.897723 | 0.703212  |
| 47 | 1 | 0.068878  | 3.243248  | 0.534734  |
| 48 | 1 | -1.633093 | 2.763815  | 0.506880  |
| 49 | 6 | -0.933736 | 3.682548  | -1.335919 |
| 50 | 1 | -1.207893 | 4.701152  | -1.038080 |
| 51 | 1 | -0.021494 | 3.731004  | -1.939740 |
| 52 | 1 | -1.734753 | 3.277581  | -1.964008 |

5<sup>Et</sup> (E = -870.0172275 a.u.)

| Center Number | Atomic Number | Coordinates (Angstroms) |           |           |
|---------------|---------------|-------------------------|-----------|-----------|
|               |               | X                       | Y         | Z         |
| 1             | 22            | -0.300886               | -0.056048 | 0.108581  |
| 2             | 7             | 0.407151                | 1.550101  | -0.635070 |
| 3             | 6             | -2.147897               | -1.581239 | 0.360995  |
| 4             | 6             | -1.904158               | -1.363909 | -1.025434 |
| 5             | 6             | -2.555975               | -0.342335 | 0.934650  |
| 6             | 17            | 0.455835                | -0.542923 | 2.283264  |
| 7             | 6             | -2.163804               | 0.014194  | -1.304369 |
| 8             | 6             | -2.567299               | 0.647704  | -0.088901 |
| 9             | 6             | 1.548111                | 0.819074  | -0.430589 |
| 10            | 6             | 0.345586                | 2.991332  | -0.883161 |
| 11            | 6             | 1.745904                | -0.464689 | -1.163328 |
| 12            | 6             | 3.089714                | -0.967804 | -0.689512 |
| 13            | 1             | 1.622428                | -0.422263 | -2.252245 |
| 14            | 6             | 2.793074                | 1.132020  | 0.371046  |
| 15            | 6             | 3.664564                | -0.084554 | 0.143456  |
| 16            | 1             | 3.299733                | 2.043519  | 0.017597  |
| 17            | 1             | 2.577554                | 1.282615  | 1.436192  |
| 18            | 6             | 4.999197                | -0.189809 | 0.830087  |
| 19            | 6             | 3.607113                | -2.299771 | -1.161900 |
| 20            | 1             | 4.607474                | -2.514189 | -0.775016 |
| 21            | 1             | 3.654649                | -2.337604 | -2.259348 |
| 22            | 1             | 2.942393                | -3.114301 | -0.840851 |
| 23            | 1             | 5.543918                | -1.096039 | 0.549491  |
| 24            | 1             | 4.872609                | -0.195530 | 1.921311  |
| 25            | 1             | 5.631440                | 0.675288  | 0.585816  |
| 26            | 6             | -1.577437               | -2.424150 | -2.052185 |
| 27            | 6             | -2.060038               | -2.896792 | 1.092877  |
| 28            | 6             | -2.998077               | -0.141751 | 2.361546  |
| 29            | 6             | -3.107847               | 2.050034  | 0.057922  |
| 30            | 6             | -2.158277               | 0.642892  | -2.677155 |
| 31            | 1             | -2.499198               | -2.830304 | -2.492718 |
| 32            | 1             | -1.027988               | -3.261861 | -1.610758 |
| 33            | 1             | -0.974096               | -2.025877 | -2.875399 |
| 34            | 1             | -3.055173               | -3.353815 | 1.190549  |
| 35            | 1             | -1.651801               | -2.765472 | 2.099882  |
| 36            | 1             | -1.419837               | -3.611677 | 0.566047  |
| 37            | 1             | -4.061434               | -0.399320 | 2.472330  |
| 38            | 1             | -2.874539               | 0.898188  | 2.680119  |
| 39            | 1             | -2.425471               | -0.768881 | 3.050659  |
| 40            | 1             | -4.207287               | 2.043451  | 0.034063  |
| 41            | 1             | -2.768231               | 2.702095  | -0.751425 |
| 42            | 1             | -2.804459               | 2.508746  | 1.004878  |
| 43            | 1             | -3.133424               | 0.505958  | -3.166346 |
| 44            | 1             | -1.400168               | 0.195029  | -3.328362 |
| 45            | 1             | -1.959107               | 1.717336  | -2.631757 |

|    |   |           |           |           |
|----|---|-----------|-----------|-----------|
| 46 | 1 | 0.923441  | -1.262629 | -0.885289 |
| 47 | 1 | -0.628066 | 3.212456  | -1.334566 |
| 48 | 1 | 1.114344  | 3.257948  | -1.623556 |
| 49 | 6 | 0.520325  | 3.848417  | 0.383551  |
| 50 | 1 | 0.429899  | 4.912956  | 0.135603  |
| 51 | 1 | -0.246824 | 3.596919  | 1.123727  |
| 52 | 1 | 1.500797  | 3.686124  | 0.843019  |

$10^{\text{Et}}$  (E = -1042.1258594 a.u.)

| Center Number | Atomic Number | Coordinates (Angstroms) |           |           |
|---------------|---------------|-------------------------|-----------|-----------|
|               |               | X                       | Y         | Z         |
| 1             | 22            | -0.769089               | 0.061485  | -0.269275 |
| 2             | 7             | 0.446048                | 1.323311  | -0.881416 |
| 3             | 6             | 0.823632                | 1.240962  | 0.457942  |
| 4             | 7             | 0.748472                | -1.507855 | 0.079977  |
| 5             | 6             | -2.411573               | 1.288062  | 0.909156  |
| 6             | 6             | -1.756126               | 0.449250  | 1.863835  |
| 7             | 6             | -3.134589               | 0.448607  | 0.015175  |
| 8             | 17            | -1.262964               | -0.618146 | -2.534934 |
| 9             | 6             | -2.082458               | -0.904441 | 1.553412  |
| 10            | 6             | -2.931950               | -0.905433 | 0.412019  |
| 11            | 6             | 0.965327                | 2.180184  | -1.941259 |
| 12            | 6             | 1.876330                | -1.042720 | 0.469669  |
| 13            | 6             | 0.641984                | -2.938655 | -0.324992 |
| 14            | 6             | 2.004112                | 0.385943  | 0.919239  |
| 15            | 1             | 0.661387                | 2.117800  | 1.091880  |
| 16            | 6             | 3.470767                | 0.684538  | 0.596456  |
| 17            | 1             | 1.921222                | 0.372156  | 2.021195  |
| 18            | 6             | 3.250000                | -1.672454 | 0.439224  |
| 19            | 6             | 4.152219                | -0.448844 | 0.358696  |
| 20            | 1             | 3.433706                | -2.245603 | 1.361349  |
| 21            | 1             | 3.389668                | -2.366864 | -0.392111 |
| 22            | 6             | 5.619231                | -0.632347 | 0.078765  |
| 23            | 6             | 3.992924                | 2.091492  | 0.669240  |
| 24            | 1             | 5.061057                | 2.151787  | 0.441179  |
| 25            | 1             | 3.835264                | 2.511575  | 1.673161  |
| 26            | 1             | 3.456511                | 2.742889  | -0.032006 |
| 27            | 1             | 6.155215                | 0.320393  | 0.042361  |
| 28            | 1             | 5.773749                | -1.143512 | -0.881859 |
| 29            | 1             | 6.091801                | -1.256031 | 0.851263  |
| 30            | 6             | -1.069052               | 0.906819  | 3.125979  |
| 31            | 6             | -2.442052               | 2.797270  | 0.942535  |
| 32            | 6             | -4.049647               | 0.899471  | -1.095060 |
| 33            | 6             | -3.582013               | -2.100229 | -0.238773 |
| 34            | 6             | -1.692842               | -2.099083 | 2.391038  |
| 35            | 1             | -1.786814               | 0.943416  | 3.959056  |
| 36            | 1             | -0.641351               | 1.907338  | 3.015946  |
| 37            | 1             | -0.261148               | 0.228435  | 3.421163  |
| 38            | 1             | -3.208302               | 3.154131  | 1.645988  |
| 39            | 1             | -2.675218               | 3.217599  | -0.040436 |
| 40            | 1             | -1.482275               | 3.216312  | 1.262492  |
| 41            | 1             | -5.089100               | 0.942262  | -0.738063 |
| 42            | 1             | -4.009799               | 0.214304  | -1.946199 |
| 43            | 1             | -3.784680               | 1.896398  | -1.461054 |
| 44            | 1             | -4.654363               | -2.136694 | 0.000004  |
| 45            | 1             | -3.138875               | -3.041133 | 0.103671  |
| 46            | 1             | -3.482153               | -2.059382 | -1.328718 |
| 47            | 1             | -2.343673               | -2.180386 | 3.273304  |
| 48            | 1             | -0.661372               | -2.024470 | 2.752616  |
| 49            | 1             | -1.783958               | -3.036604 | 1.833939  |
| 50            | 1             | -0.401387               | -3.228633 | -0.174412 |
| 51            | 1             | 1.251781                | -3.546502 | 0.355952  |
| 52            | 1             | 2.044630                | 1.990941  | -2.058225 |
| 53            | 1             | 0.477696                | 1.875774  | -2.873714 |
| 54            | 6             | 1.035839                | -3.208724 | -1.785571 |



|    |   |           |           |           |
|----|---|-----------|-----------|-----------|
| 55 | 1 | 0.900745  | -4.274408 | -2.004070 |
| 56 | 1 | 0.407954  | -2.627570 | -2.463635 |
| 57 | 1 | 2.082263  | -2.952816 | -1.980015 |
| 58 | 6 | 0.731729  | 3.679089  | -1.687774 |
| 59 | 1 | 1.158748  | 4.276395  | -2.502417 |
| 60 | 1 | -0.340504 | 3.896299  | -1.626335 |
| 61 | 1 | 1.199535  | 3.999484  | -0.748959 |

**11<sup>Et</sup>** (E = -1042.0995569 a.u.)

| Center Number | Atomic Number | Coordinates (Angstroms) |           |           |
|---------------|---------------|-------------------------|-----------|-----------|
|               |               | X                       | Y         | Z         |
| 1             | 22            | 1.270741                | -0.297590 | -0.523382 |
| 2             | 7             | -0.205042               | -1.368924 | -0.390479 |
| 3             | 6             | -0.690708               | -0.160795 | 0.173199  |
| 4             | 7             | -3.699419               | -0.934799 | -0.591517 |
| 5             | 6             | 3.090038                | -1.235834 | 0.642054  |
| 6             | 6             | 2.212402                | -0.680701 | 1.612423  |
| 7             | 6             | 3.636544                | -0.159971 | -0.128057 |
| 8             | 17            | 1.460659                | 0.516882  | -2.699281 |
| 9             | 6             | 2.190472                | 0.736341  | 1.428906  |
| 10            | 6             | 3.089488                | 1.055210  | 0.363566  |
| 11            | 6             | -0.883402               | -2.662615 | -0.522805 |
| 12            | 6             | -3.201423               | 0.167623  | -0.209424 |
| 13            | 6             | -5.078448               | -1.268757 | -0.181316 |
| 14            | 6             | -1.786122               | 0.626760  | -0.586020 |
| 15            | 1             | -0.878271               | -0.169133 | 1.254535  |
| 16            | 6             | -1.823630               | 2.108072  | -0.233763 |
| 17            | 1             | -1.619909               | 0.473172  | -1.657945 |
| 18            | 6             | -3.865620               | 1.264617  | 0.610848  |
| 19            | 6             | -2.934729               | 2.442429  | 0.443243  |
| 20            | 1             | -4.876946               | 1.480918  | 0.241697  |
| 21            | 1             | -3.989309               | 0.965453  | 1.662595  |
| 22            | 6             | -3.339994               | 3.787974  | 0.983918  |
| 23            | 6             | -0.712417               | 3.025517  | -0.665258 |
| 24            | 1             | -0.927126               | 4.071910  | -0.428285 |
| 25            | 1             | -0.546303               | 2.944909  | -1.747047 |
| 26            | 1             | 0.237452                | 2.762479  | -0.184074 |
| 27            | 1             | -2.592000               | 4.561700  | 0.788831  |
| 28            | 1             | -3.498087               | 3.738926  | 2.070938  |
| 29            | 1             | -4.290936               | 4.116538  | 0.540584  |
| 30            | 6             | 1.528702                | -1.413147 | 2.738079  |
| 31            | 6             | 3.449565                | -2.694952 | 0.484849  |
| 32            | 6             | 4.680545                | -0.282309 | -1.209448 |
| 33            | 6             | 3.449623                | 2.433007  | -0.134055 |
| 34            | 6             | 1.504756                | 1.713324  | 2.351653  |
| 35            | 1             | 2.079170                | -1.260160 | 3.677164  |
| 36            | 1             | 1.484003                | -2.489496 | 2.552891  |
| 37            | 1             | 0.505254                | -1.058613 | 2.897854  |
| 38            | 1             | 4.391640                | -2.917477 | 1.005164  |
| 39            | 1             | 3.589540                | -2.973158 | -0.566051 |
| 40            | 1             | 2.679364                | -3.349591 | 0.903771  |
| 41            | 1             | 5.687266                | -0.165883 | -0.783197 |
| 42            | 1             | 4.552295                | 0.482801  | -1.980542 |
| 43            | 1             | 4.644878                | -1.259127 | -1.702387 |
| 44            | 1             | 4.430535                | 2.738816  | 0.255735  |
| 45            | 1             | 2.721114                | 3.183948  | 0.185923  |
| 46            | 1             | 3.501451                | 2.463985  | -1.227409 |
| 47            | 1             | 2.102314                | 1.860282  | 3.262871  |
| 48            | 1             | 0.516200                | 1.356924  | 2.657677  |
| 49            | 1             | 1.373415                | 2.693884  | 1.885106  |
| 50            | 1             | -5.782806               | -0.573639 | -0.665434 |
| 51            | 1             | -5.203169               | -1.139215 | 0.905527  |
| 52            | 1             | -0.213076               | -3.332688 | -1.075126 |
| 53            | 1             | -1.787050               | -2.509503 | -1.124908 |
| 54            | 6             | -5.423961               | -2.706492 | -0.576201 |

|    |   |           |           |           |
|----|---|-----------|-----------|-----------|
| 55 | 1 | -6.453240 | -2.953612 | -0.291304 |
| 56 | 1 | -5.322432 | -2.841940 | -1.658498 |
| 57 | 1 | -4.750419 | -3.415860 | -0.082407 |
| 58 | 6 | -1.273164 | -3.298083 | 0.820057  |
| 59 | 1 | -1.939101 | -2.635193 | 1.382621  |
| 60 | 1 | -1.802302 | -4.242685 | 0.646308  |
| 61 | 1 | -0.390792 | -3.506942 | 1.434303  |

**TS11<sup>Et</sup>-12<sup>Et</sup>** (E = -1042.0720963 a.u.)

| Center Number | Atomic Number | Coordinates (Angstroms) |           |           |
|---------------|---------------|-------------------------|-----------|-----------|
|               |               | X                       | Y         | Z         |
| 1             | 22            | 1.025500                | 0.062830  | -0.311288 |
| 2             | 7             | 0.352194                | -0.787512 | 1.250282  |
| 3             | 6             | -0.249712               | 0.433508  | 1.444697  |
| 4             | 7             | -2.377903               | -1.106280 | -0.012200 |
| 5             | 6             | 3.246361                | 0.358722  | 0.328322  |
| 6             | 6             | 2.618355                | 1.633893  | 0.462178  |
| 7             | 6             | 3.281367                | 0.038879  | -1.061926 |
| 8             | 17            | 0.552887                | -1.483397 | -2.017643 |
| 9             | 6             | 2.262820                | 2.092181  | -0.847758 |
| 10            | 6             | 2.677699                | 1.107130  | -1.783617 |
| 11            | 6             | 0.532509                | -1.804441 | 2.283925  |
| 12            | 6             | -2.191644               | 0.116782  | -0.257873 |
| 13            | 6             | -3.473163               | -1.849808 | -0.643285 |
| 14            | 6             | -1.099818               | 0.950160  | 0.416958  |
| 15            | 1             | 0.009122                | 1.062968  | 2.296150  |
| 16            | 6             | -1.716093               | 2.323842  | 0.495616  |
| 17            | 1             | -0.279735               | 1.128104  | -0.814360 |
| 18            | 6             | -3.025842               | 1.109033  | -1.058866 |
| 19            | 6             | -2.767518               | 2.414495  | -0.339888 |
| 20            | 1             | -2.697058               | 1.149399  | -2.107374 |
| 21            | 1             | -4.087656               | 0.850611  | -1.071588 |
| 22            | 6             | -3.657999               | 3.596062  | -0.605173 |
| 23            | 6             | -1.212142               | 3.383325  | 1.437328  |
| 24            | 1             | -1.784693               | 4.309569  | 1.340226  |
| 25            | 1             | -0.158545               | 3.620361  | 1.259381  |
| 26            | 1             | -1.293762               | 3.050991  | 2.480765  |
| 27            | 1             | -3.358650               | 4.486289  | -0.045372 |
| 28            | 1             | -4.700271               | 3.365263  | -0.343765 |
| 29            | 1             | -3.649267               | 3.850120  | -1.674551 |
| 30            | 6             | 2.603012                | 2.448591  | 1.733805  |
| 31            | 6             | 3.940142                | -0.413912 | 1.423956  |
| 32            | 6             | 3.946939                | -1.171096 | -1.666453 |
| 33            | 6             | 2.544057                | 1.190260  | -3.281905 |
| 34            | 6             | 1.718104                | 3.453754  | -1.207685 |
| 35            | 1             | 3.591829                | 2.899633  | 1.900678  |
| 36            | 1             | 2.370904                | 1.839557  | 2.613602  |
| 37            | 1             | 1.877651                | 3.264851  | 1.693354  |
| 38            | 1             | 5.009200                | -0.157965 | 1.458376  |
| 39            | 1             | 3.868958                | -1.495756 | 1.269026  |
| 40            | 1             | 3.516772                | -0.190315 | 2.407238  |
| 41            | 1             | 5.009009                | -0.960952 | -1.859711 |
| 42            | 1             | 3.478564                | -1.455790 | -2.611826 |
| 43            | 1             | 3.897763                | -2.038272 | -1.000023 |
| 44            | 1             | 3.481426                | 1.540949  | -3.737008 |
| 45            | 1             | 1.751784                | 1.885565  | -3.576749 |
| 46            | 1             | 2.304464                | 0.213346  | -3.712733 |
| 47            | 1             | 2.538240                | 4.126928  | -1.495565 |
| 48            | 1             | 1.192126                | 3.920826  | -0.371506 |
| 49            | 1             | 1.021309                | 3.403728  | -2.050298 |
| 50            | 1             | -3.005725               | -2.542496 | -1.356378 |
| 51            | 1             | -4.162759               | -1.212060 | -1.216347 |
| 52            | 1             | 1.372551                | -2.437666 | 1.977651  |
| 53            | 1             | -0.364938               | -2.440629 | 2.278891  |
| 54            | 6             | -4.249845               | -2.651873 | 0.409393  |

|    |   |           |           |           |
|----|---|-----------|-----------|-----------|
| 55 | 1 | -5.019335 | -3.269447 | -0.067433 |
| 56 | 1 | -3.572182 | -3.307430 | 0.966418  |
| 57 | 1 | -4.741059 | -1.982878 | 1.125779  |
| 58 | 6 | 0.763882  | -1.266554 | 3.704493  |
| 59 | 1 | -0.092915 | -0.679035 | 4.053524  |
| 60 | 1 | 0.899928  | -2.103852 | 4.398223  |
| 61 | 1 | 1.658595  | -0.635744 | 3.756283  |

$12^{\text{Et}}$  (E = -1042.0877979 a.u.)

| Center Number | Atomic Number | Coordinates (Angstroms) |           |           |
|---------------|---------------|-------------------------|-----------|-----------|
|               |               | X                       | Y         | Z         |
| 1             | 22            | 0.765822                | -0.352079 | -0.191031 |
| 2             | 7             | 0.043536                | -0.780827 | 1.540654  |
| 3             | 6             | -0.805963               | 0.299382  | 1.609818  |
| 4             | 7             | -2.439539               | -1.709947 | -0.018615 |
| 5             | 6             | 2.937514                | 0.241777  | 0.480708  |
| 6             | 6             | 2.177841                | 1.444824  | 0.408202  |
| 7             | 6             | 3.084846                | -0.258658 | -0.849182 |
| 8             | 17            | 0.763298                | -2.397532 | -1.276046 |
| 9             | 6             | 1.831408                | 1.668758  | -0.958018 |
| 10            | 6             | 2.399726                | 0.615330  | -1.732419 |
| 11            | 6             | 0.423988                | -1.551874 | 2.731265  |
| 12            | 6             | -2.485236               | -0.455170 | -0.202229 |
| 13            | 6             | -3.181570               | -2.620690 | -0.892307 |
| 14            | 6             | -1.791748               | 0.535646  | 0.680397  |
| 15            | 1             | -0.621155               | 1.061716  | 2.369639  |
| 16            | 6             | -2.480926               | 1.820500  | 0.486248  |
| 17            | 1             | -0.216446               | 0.394422  | -1.328226 |
| 18            | 6             | -3.341883               | 0.361389  | -1.167377 |
| 19            | 6             | -3.342657               | 1.739872  | -0.553270 |
| 20            | 1             | -2.904708               | 0.371207  | -2.175163 |
| 21            | 1             | -4.354119               | -0.043325 | -1.266016 |
| 22            | 6             | -4.222499               | 2.812492  | -1.127357 |
| 23            | 6             | -2.216402               | 3.020513  | 1.357587  |
| 24            | 1             | -2.832863               | 3.875569  | 1.068128  |
| 25            | 1             | -1.165420               | 3.331152  | 1.302942  |
| 26            | 1             | -2.430459               | 2.795973  | 2.411040  |
| 27            | 1             | -4.119049               | 3.768838  | -0.607344 |
| 28            | 1             | -5.279614               | 2.514352  | -1.081841 |
| 29            | 1             | -3.987445               | 2.975737  | -2.188922 |
| 30            | 6             | 1.959786                | 2.415920  | 1.542156  |
| 31            | 6             | 3.651714                | -0.295339 | 1.696138  |
| 32            | 6             | 3.933162                | -1.436341 | -1.250528 |
| 33            | 6             | 2.304916                | 0.456628  | -3.226979 |
| 34            | 6             | 1.135394                | 2.892579  | -1.498131 |
| 35            | 1             | 2.822341                | 3.092400  | 1.626926  |
| 36            | 1             | 1.847183                | 1.908782  | 2.505043  |
| 37            | 1             | 1.074158                | 3.037684  | 1.383825  |
| 38            | 1             | 4.689374                | 0.067448  | 1.719053  |
| 39            | 1             | 3.690876                | -1.389829 | 1.698039  |
| 40            | 1             | 3.171861                | 0.024861  | 2.624888  |
| 41            | 1             | 4.964813                | -1.105810 | -1.439862 |
| 42            | 1             | 3.557270                | -1.912905 | -2.159149 |
| 43            | 1             | 3.965697                | -2.200429 | -0.468244 |
| 44            | 1             | 3.184602                | 0.890298  | -3.723583 |
| 45            | 1             | 1.416259                | 0.954585  | -3.626454 |
| 46            | 1             | 2.247585                | -0.598908 | -3.510739 |
| 47            | 1             | 1.858311                | 3.707023  | -1.650146 |
| 48            | 1             | 0.362987                | 3.257711  | -0.814543 |
| 49            | 1             | 0.653600                | 2.687401  | -2.457921 |
| 50            | 1             | -2.433509               | -3.121281 | -1.523295 |
| 51            | 1             | -3.883766               | -2.106321 | -1.566188 |
| 52            | 1             | 1.382590                | -2.035895 | 2.517801  |
| 53            | 1             | -0.316222               | -2.358652 | 2.843858  |
| 54            | 6             | -3.927408               | -3.672490 | -0.059842 |

|    |   |           |           |           |
|----|---|-----------|-----------|-----------|
| 55 | 1 | -4.418291 | -4.403922 | -0.711894 |
| 56 | 1 | -3.229712 | -4.202944 | 0.596692  |
| 57 | 1 | -4.693823 | -3.202192 | 0.567565  |
| 58 | 6 | 0.511939  | -0.764011 | 4.047645  |
| 59 | 1 | -0.457641 | -0.338381 | 4.329738  |
| 60 | 1 | 0.826666  | -1.436112 | 4.853810  |
| 61 | 1 | 1.240280  | 0.052724  | 3.986572  |

$19^{\text{Et}}$  (E = -1042.1256169 a.u.)

| Center Number | Atomic Number | Coordinates (Angstroms) |           |           |
|---------------|---------------|-------------------------|-----------|-----------|
|               |               | X                       | Y         | Z         |
| 1             | 22            | -1.015902               | 0.067743  | 0.490370  |
| 2             | 7             | 0.211863                | 1.726968  | 0.808506  |
| 3             | 6             | 1.479410                | 1.759022  | 0.402442  |
| 4             | 7             | 0.786862                | -1.089153 | 0.912390  |
| 5             | 6             | -2.414895               | 1.169273  | -1.139671 |
| 6             | 6             | -3.074401               | -0.056585 | -0.838587 |
| 7             | 6             | -1.157219               | 0.852909  | -1.728574 |
| 8             | 17            | -2.184491               | -1.260687 | 2.068284  |
| 9             | 6             | -2.238085               | -1.126749 | -1.251189 |
| 10            | 6             | -1.036034               | -0.570545 | -1.779655 |
| 11            | 6             | -0.271595               | 3.005676  | 1.391767  |
| 12            | 6             | 1.953509                | -0.670279 | 0.469621  |
| 13            | 6             | 0.786843                | -2.414324 | 1.597567  |
| 14            | 6             | 2.269962                | 0.663082  | 0.087067  |
| 15            | 1             | 1.955433                | 2.741061  | 0.353987  |
| 16            | 6             | 3.668775                | 0.704703  | -0.377868 |
| 17            | 1             | -1.982539               | 1.172758  | 1.255342  |
| 18            | 6             | 3.234721                | -1.486120 | 0.333132  |
| 19            | 6             | 4.228837                | -0.519301 | -0.267134 |
| 20            | 1             | 3.580940                | -1.844166 | 1.311660  |
| 21            | 1             | 3.082032                | -2.379637 | -0.281804 |
| 22            | 6             | 5.621923                | -0.967443 | -0.611721 |
| 23            | 6             | 4.315595                | 1.973478  | -0.868734 |
| 24            | 1             | 5.327164                | 1.794115  | -1.243639 |
| 25            | 1             | 4.388332                | 2.719222  | -0.064883 |
| 26            | 1             | 3.729588                | 2.429040  | -1.678277 |
| 27            | 1             | 6.216812                | -0.160655 | -1.050952 |
| 28            | 1             | 5.606550                | -1.800576 | -1.329350 |
| 29            | 1             | 6.156586                | -1.327745 | 0.279508  |
| 30            | 6             | -4.464422               | -0.196334 | -0.280149 |
| 31            | 6             | -3.035435               | 2.540175  | -1.057422 |
| 32            | 6             | -0.224805               | 1.833000  | -2.393038 |
| 33            | 6             | 0.071399                | -1.321995 | -2.476612 |
| 34            | 6             | -2.639805               | -2.578928 | -1.225526 |
| 35            | 1             | -5.200528               | -0.241758 | -1.096220 |
| 36            | 1             | -4.726040               | 0.650541  | 0.361155  |
| 37            | 1             | -4.563030               | -1.105947 | 0.318007  |
| 38            | 1             | -3.630915               | 2.738131  | -1.960437 |
| 39            | 1             | -2.278775               | 3.326829  | -0.987343 |
| 40            | 1             | -3.699038               | 2.633003  | -0.192891 |
| 41            | 1             | -0.517154               | 1.974713  | -3.443541 |
| 42            | 1             | 0.810867                | 1.481917  | -2.381465 |
| 43            | 1             | -0.249605               | 2.812679  | -1.907058 |
| 44            | 1             | -0.116841               | -1.358558 | -3.559129 |
| 45            | 1             | 0.152189                | -2.351652 | -2.118522 |
| 46            | 1             | 1.043423                | -0.841031 | -2.327916 |
| 47            | 1             | -3.500058               | -2.738201 | -1.890127 |
| 48            | 1             | -2.934394               | -2.899356 | -0.220329 |
| 49            | 1             | -1.832982               | -3.229844 | -1.572308 |
| 50            | 1             | -1.309622               | 3.156349  | 1.092144  |
| 51            | 1             | 0.327310                | 3.834680  | 0.982997  |
| 52            | 1             | 0.039328                | -2.358883 | 2.389212  |
| 53            | 1             | 1.761642                | -2.568671 | 2.075274  |
| 54            | 6             | 0.462922                | -3.606042 | 0.686291  |

|    |   |           |           |           |
|----|---|-----------|-----------|-----------|
| 55 | 1 | 1.161064  | -3.681864 | -0.154736 |
| 56 | 1 | 0.526024  | -4.536631 | 1.263224  |
| 57 | 1 | -0.551672 | -3.525004 | 0.290684  |
| 58 | 6 | -0.174404 | 3.004723  | 2.923458  |
| 59 | 1 | -0.537439 | 3.956514  | 3.330521  |
| 60 | 1 | -0.779708 | 2.193763  | 3.341430  |
| 61 | 1 | 0.863387  | 2.863134  | 3.247737  |

$20^{\text{Et}}$  (E = -1042.0936899 a.u.)

| Center Number | Atomic Number | Coordinates (Angstroms) |           |           |
|---------------|---------------|-------------------------|-----------|-----------|
|               |               | X                       | Y         | Z         |
| 1             | 22            | -1.502023               | -0.529382 | 0.053245  |
| 2             | 7             | 0.124467                | 0.411143  | 0.513595  |
| 3             | 6             | 1.077764                | -0.589680 | 0.421534  |
| 4             | 7             | 3.160199                | 1.590732  | -0.577129 |
| 5             | 6             | -2.976045               | 1.141782  | 0.899615  |
| 6             | 6             | -3.637202               | -0.124377 | 0.975110  |
| 7             | 6             | -2.739483               | 1.434869  | -0.470794 |
| 8             | 17            | -1.213617               | -2.316612 | -1.373547 |
| 9             | 6             | -3.835891               | -0.594642 | -0.355638 |
| 10            | 6             | -3.256503               | 0.349946  | -1.245891 |
| 11            | 6             | 0.528518                | 1.765489  | 0.939907  |
| 12            | 6             | 3.421191                | 0.411798  | -0.154001 |
| 13            | 6             | 4.283198                | 2.453439  | -0.982635 |
| 14            | 6             | 2.433035                | -0.623904 | 0.227757  |
| 15            | 1             | 0.642983                | -1.581337 | 0.555132  |
| 16            | 6             | 3.186403                | -1.891243 | 0.360749  |
| 17            | 1             | -1.661520               | -1.359277 | 1.496963  |
| 18            | 6             | 4.799711                | -0.238104 | -0.081352 |
| 19            | 6             | 4.513169                | -1.687292 | 0.208016  |
| 20            | 1             | 5.348463                | -0.101660 | -1.022118 |
| 21            | 1             | 5.417454                | 0.229875  | 0.699068  |
| 22            | 6             | 5.641387                | -2.676520 | 0.293398  |
| 23            | 6             | 2.507973                | -3.204384 | 0.654450  |
| 24            | 1             | 3.226085                | -4.027553 | 0.693228  |
| 25            | 1             | 1.763395                | -3.446634 | -0.114986 |
| 26            | 1             | 1.980552                | -3.174509 | 1.617640  |
| 27            | 1             | 5.295999                | -3.689085 | 0.520669  |
| 28            | 1             | 6.360675                | -2.383362 | 1.072286  |
| 29            | 1             | 6.200640                | -2.716849 | -0.652815 |
| 30            | 6             | -4.240436               | -0.719408 | 2.222287  |
| 31            | 6             | -2.752765               | 2.038051  | 2.092528  |
| 32            | 6             | -2.195445               | 2.710821  | -1.068556 |
| 33            | 6             | -3.275862               | 0.298760  | -2.752685 |
| 34            | 6             | -4.578481               | -1.849390 | -0.735532 |
| 35            | 1             | -5.255706               | -0.325231 | 2.375056  |
| 36            | 1             | -3.648384               | -0.478112 | 3.109472  |
| 37            | 1             | -4.310816               | -1.808718 | 2.156013  |
| 38            | 1             | -3.720148               | 2.319189  | 2.530156  |
| 39            | 1             | -2.235770               | 2.962019  | 1.822897  |
| 40            | 1             | -2.171012               | 1.542605  | 2.877118  |
| 41            | 1             | -2.960394               | 3.175877  | -1.704256 |
| 42            | 1             | -1.311331               | 2.539264  | -1.692590 |
| 43            | 1             | -1.924145               | 3.437741  | -0.299153 |
| 44            | 1             | -4.161234               | 0.824069  | -3.138371 |
| 45            | 1             | -3.306574               | -0.729668 | -3.121414 |
| 46            | 1             | -2.392818               | 0.780939  | -3.184468 |
| 47            | 1             | -5.660762               | -1.657247 | -0.746014 |
| 48            | 1             | -4.392735               | -2.661024 | -0.025072 |
| 49            | 1             | -4.288856               | -2.205277 | -1.727049 |
| 50            | 1             | -0.346955               | 2.406636  | 0.857447  |
| 51            | 1             | 1.304285                | 2.138868  | 0.263335  |
| 52            | 1             | 5.057554                | 2.484712  | -0.199063 |
| 53            | 1             | 4.763725                | 2.033737  | -1.881609 |
| 54            | 6             | 1.053713                | 1.787143  | 2.384764  |

|    |   |          |          |           |
|----|---|----------|----------|-----------|
| 55 | 1 | 1.960962 | 1.182795 | 2.483873  |
| 56 | 1 | 1.298863 | 2.816300 | 2.673797  |
| 57 | 1 | 0.306135 | 1.399115 | 3.085803  |
| 58 | 6 | 3.792774 | 3.872552 | -1.281128 |
| 59 | 1 | 3.342202 | 4.322775 | -0.389291 |
| 60 | 1 | 4.622085 | 4.511304 | -1.606184 |
| 61 | 1 | 3.036095 | 3.859179 | -2.073292 |

**21<sup>Et</sup>** (E = -1042.1103718 a.u.)

| Center Number | Atomic Number | Coordinates (Angstroms) |           |           |
|---------------|---------------|-------------------------|-----------|-----------|
|               |               | X                       | Y         | Z         |
| 1             | 22            | 0.758656                | -0.138007 | -0.103240 |
| 2             | 7             | -0.182992               | 1.643311  | -0.121745 |
| 3             | 6             | -1.494655               | 1.683502  | 0.249606  |
| 4             | 7             | -1.089192               | -1.040732 | -0.864576 |
| 5             | 6             | 2.931777                | 0.790482  | -0.712075 |
| 6             | 6             | 2.929788                | -0.621859 | -0.939502 |
| 7             | 6             | 2.852382                | 1.010894  | 0.693999  |
| 8             | 17            | -0.127172               | -1.225747 | 1.876883  |
| 9             | 6             | 2.810404                | -1.262232 | 0.322738  |
| 10            | 6             | 2.768292                | -0.250500 | 1.331258  |
| 11            | 6             | 0.328213                | 3.006349  | -0.416868 |
| 12            | 6             | -2.243923               | -0.563864 | -0.525132 |
| 13            | 6             | -1.057172               | -2.290534 | -1.664059 |
| 14            | 6             | -2.437601               | 0.695044  | 0.143943  |
| 15            | 1             | -1.840406               | 2.648215  | 0.626014  |
| 16            | 6             | -3.866697               | 0.818052  | 0.477372  |
| 17            | 1             | 0.863338                | -0.474723 | -1.721326 |
| 18            | 6             | -3.615802               | -1.183487 | -0.738339 |
| 19            | 6             | -4.549838               | -0.238546 | -0.015551 |
| 20            | 1             | -3.861497               | -1.254907 | -1.806953 |
| 21            | 1             | -3.662607               | -2.202612 | -0.340136 |
| 22            | 6             | -6.020534               | -0.537309 | 0.059250  |
| 23            | 6             | -4.415841               | 1.995240  | 1.238320  |
| 24            | 1             | -5.484433               | 1.884796  | 1.442128  |
| 25            | 1             | -4.278878               | 2.930378  | 0.677704  |
| 26            | 1             | -3.897972               | 2.114834  | 2.199116  |
| 27            | 1             | -6.568316               | 0.220319  | 0.627479  |
| 28            | 1             | -6.200795               | -1.510961 | 0.537346  |
| 29            | 1             | -6.466294               | -0.590023 | -0.944935 |
| 30            | 6             | 3.272564                | -1.292159 | -2.247149 |
| 31            | 6             | 3.218716                | 1.799475  | -1.799770 |
| 32            | 6             | 3.001605                | 2.312976  | 1.445870  |
| 33            | 6             | 2.841674                | -0.468052 | 2.818286  |
| 34            | 6             | 2.866548                | -2.749541 | 0.572629  |
| 35            | 1             | 4.362064                | -1.420054 | -2.330824 |
| 36            | 1             | 2.934199                | -0.700536 | -3.102637 |
| 37            | 1             | 2.816692                | -2.283844 | -2.328889 |
| 38            | 1             | 4.172506                | 1.560448  | -2.289162 |
| 39            | 1             | 3.305367                | 2.816161  | -1.405866 |
| 40            | 1             | 2.446689                | 1.804022  | -2.577991 |
| 41            | 1             | 3.820147                | 2.227957  | 2.172325  |
| 42            | 1             | 2.097912                | 2.579530  | 2.006030  |
| 43            | 1             | 3.244441                | 3.146470  | 0.780433  |
| 44            | 1             | 3.886348                | -0.387296 | 3.155412  |
| 45            | 1             | 2.467468                | -1.454142 | 3.099717  |
| 46            | 1             | 2.252358                | 0.272939  | 3.366983  |
| 47            | 1             | 3.898191                | -3.063386 | 0.788065  |
| 48            | 1             | 2.528908                | -3.320684 | -0.298717 |
| 49            | 1             | 2.242749                | -3.035189 | 1.424583  |
| 50            | 1             | 1.411585                | 2.983384  | -0.419601 |
| 51            | 1             | 0.016139                | 3.690374  | 0.388188  |
| 52            | 1             | -0.177498               | -2.225357 | -2.310873 |
| 53            | 1             | -1.938316               | -2.336494 | -2.317358 |
| 54            | 6             | -0.179132               | 3.533060  | -1.768818 |

|    |   |           |           |           |
|----|---|-----------|-----------|-----------|
| 55 | 1 | -1.272552 | 3.607560  | -1.779123 |
| 56 | 1 | 0.233356  | 4.529222  | -1.970178 |
| 57 | 1 | 0.120129  | 2.861019  | -2.580422 |
| 58 | 6 | -0.977648 | -3.567528 | -0.809858 |
| 59 | 1 | -0.929304 | -4.443973 | -1.467222 |
| 60 | 1 | -0.092374 | -3.561321 | -0.168624 |
| 61 | 1 | -1.851284 | -3.673096 | -0.159077 |

**TS21<sup>Et</sup>-13<sup>Et</sup>** (E = -1042.1056904 a.u.)

| Center Number | Atomic Number | Coordinates (Angstroms) |           |           |
|---------------|---------------|-------------------------|-----------|-----------|
|               |               | X                       | Y         | Z         |
| 1             | 22            | 0.740446                | 0.074858  | -0.214654 |
| 2             | 7             | 0.504621                | -0.991112 | 1.458756  |
| 3             | 6             | -0.450281               | -0.631947 | 2.348871  |
| 4             | 7             | -1.440678               | 0.230673  | -0.333520 |
| 5             | 6             | 3.026349                | 0.499940  | 0.475287  |
| 6             | 6             | 2.410957                | 1.731454  | 0.106321  |
| 7             | 6             | 3.127135                | -0.308882 | -0.688838 |
| 8             | 17            | 0.312791                | -1.705952 | -1.833571 |
| 9             | 6             | 2.173205                | 1.697503  | -1.306308 |
| 10            | 6             | 2.620046                | 0.449696  | -1.792718 |
| 11            | 6             | 1.276377                | -2.227129 | 1.756067  |
| 12            | 6             | -2.127990               | 0.340857  | 0.760653  |
| 13            | 6             | -2.109013               | 0.507458  | -1.629949 |
| 14            | 6             | -1.617366               | 0.048120  | 2.075470  |
| 15            | 1             | -0.307527               | -0.956440 | 3.377812  |
| 16            | 6             | -2.646342               | 0.428930  | 3.058053  |
| 17            | 1             | 0.179426                | 1.572894  | 0.225566  |
| 18            | 6             | -3.553379               | 0.844051  | 0.926374  |
| 19            | 6             | -3.748801               | 0.887987  | 2.425426  |
| 20            | 1             | -3.678048               | 1.830026  | 0.459207  |
| 21            | 1             | -4.282633               | 0.182799  | 0.445221  |
| 22            | 6             | -5.047215               | 1.371317  | 3.007605  |
| 23            | 6             | -2.434421               | 0.279157  | 4.541529  |
| 24            | 1             | -3.283579               | 0.662119  | 5.114155  |
| 25            | 1             | -1.535319               | 0.819370  | 4.867214  |
| 26            | 1             | -2.295694               | -0.775282 | 4.817911  |
| 27            | 1             | -5.037638               | 1.366003  | 4.101705  |
| 28            | 1             | -5.887909               | 0.743398  | 2.677885  |
| 29            | 1             | -5.270526               | 2.396687  | 2.678845  |
| 30            | 6             | 1.595470                | -2.515985 | 3.232107  |
| 31            | 1             | 0.705288                | -2.780219 | 3.812290  |
| 32            | 1             | 2.084482                | -1.663344 | 3.715868  |
| 33            | 6             | -3.000463               | -0.641661 | -2.127716 |
| 34            | 1             | -2.401272               | -1.545231 | -2.257651 |
| 35            | 1             | -3.814697               | -0.859417 | -1.428955 |
| 36            | 6             | 2.297850                | 2.941536  | 0.999104  |
| 37            | 6             | 3.615353                | 0.227990  | 1.837167  |
| 38            | 6             | 3.811174                | -1.644533 | -0.838329 |
| 39            | 6             | 2.707056                | 0.028415  | -3.234829 |
| 40            | 6             | 1.600766                | 2.830174  | -2.121984 |
| 41            | 1             | 3.265691                | 3.460993  | 1.060084  |
| 42            | 1             | 2.003376                | 2.667720  | 2.017521  |
| 43            | 1             | 1.557135                | 3.651706  | 0.620754  |
| 44            | 1             | 4.510892                | 0.847108  | 1.987644  |
| 45            | 1             | 3.917967                | -0.815748 | 1.954236  |
| 46            | 1             | 2.912817                | 0.467461  | 2.642168  |
| 47            | 1             | 4.678576                | -1.555891 | -1.506800 |
| 48            | 1             | 3.135310                | -2.390876 | -1.272275 |
| 49            | 1             | 4.178043                | -2.027338 | 0.118990  |
| 50            | 1             | 3.723285                | 0.212530  | -3.613703 |
| 51            | 1             | 2.011386                | 0.588164  | -3.867380 |
| 52            | 1             | 2.482316                | -1.034015 | -3.354736 |
| 53            | 1             | 2.384886                | 3.552441  | -2.390243 |
| 54            | 1             | 0.828393                | 3.372931  | -1.566320 |

|    |   |           |           |           |
|----|---|-----------|-----------|-----------|
| 55 | 1 | 1.153475  | 2.472516  | -3.055208 |
| 56 | 1 | 2.278937  | -3.371337 | 3.282667  |
| 57 | 1 | -3.445831 | -0.371350 | -3.092884 |
| 58 | 1 | -2.694653 | 1.433505  | -1.539502 |
| 59 | 1 | -1.324808 | 0.691139  | -2.370896 |
| 60 | 1 | 0.710081  | -3.070191 | 1.333796  |
| 61 | 1 | 2.205507  | -2.174564 | 1.189498  |

$13^{\text{Et}}$  (E = -1042.1114608 a.u.)

| Center Number | Atomic Number | Coordinates (Angstroms) |           |           |
|---------------|---------------|-------------------------|-----------|-----------|
|               |               | X                       | Y         | Z         |
| 1             | 22            | -0.807710               | 0.042407  | -0.150145 |
| 2             | 7             | 0.310126                | 1.699160  | -0.725903 |
| 3             | 6             | 1.610896                | 1.731045  | -0.474713 |
| 4             | 7             | 0.833877                | -1.199838 | -0.383883 |
| 5             | 6             | -3.186594               | 0.072429  | 0.247182  |
| 6             | 6             | -2.537285               | 0.856425  | 1.242897  |
| 7             | 6             | -2.767306               | -1.279486 | 0.401254  |
| 8             | 17            | -1.390090               | -0.204382 | -2.537618 |
| 9             | 6             | -1.709410               | -0.012273 | 2.020873  |
| 10            | 6             | -1.848185               | -1.335182 | 1.486655  |
| 11            | 6             | -0.225536               | 2.836207  | -1.522584 |
| 12            | 6             | 2.028342                | -0.716634 | -0.081981 |
| 13            | 6             | 0.734649                | -2.616617 | -0.813797 |
| 14            | 6             | 2.390550                | 0.658876  | -0.020680 |
| 15            | 1             | 2.146255                | 2.653359  | -0.709899 |
| 16            | 6             | 3.822475                | 0.743647  | 0.329430  |
| 17            | 1             | 0.164183                | 0.448083  | 1.112246  |
| 18            | 6             | 3.279384                | -1.531725 | 0.205249  |
| 19            | 6             | 4.342802                | -0.494418 | 0.476642  |
| 20            | 1             | 3.110786                | -2.195881 | 1.063689  |
| 21            | 1             | 3.554665                | -2.180689 | -0.633599 |
| 22            | 6             | 5.745548                | -0.906318 | 0.826922  |
| 23            | 6             | 4.536412                | 2.061992  | 0.477826  |
| 24            | 1             | 5.566933                | 1.928580  | 0.818692  |
| 25            | 1             | 4.021241                | 2.709212  | 1.200229  |
| 26            | 1             | 4.571702                | 2.606390  | -0.476025 |
| 27            | 1             | 6.393955                | -0.044083 | 1.010385  |
| 28            | 1             | 6.200231                | -1.498097 | 0.018931  |
| 29            | 1             | 5.762841                | -1.535620 | 1.728672  |
| 30            | 6             | -2.796220               | 2.313708  | 1.543123  |
| 31            | 6             | -4.227639               | 0.550426  | -0.730705 |
| 32            | 6             | -3.280904               | -2.433784 | -0.420951 |
| 33            | 6             | -1.240217               | -2.570591 | 2.106408  |
| 34            | 6             | -1.077119               | 0.327837  | 3.347547  |
| 35            | 1             | -3.617947               | 2.416416  | 2.266547  |
| 36            | 1             | -3.081434               | 2.872174  | 0.645968  |
| 37            | 1             | -1.916175               | 2.799422  | 1.976060  |
| 38            | 1             | -5.235184               | 0.339504  | -0.343934 |
| 39            | 1             | -4.120859               | 0.053327  | -1.698538 |
| 40            | 1             | -4.159455               | 1.629195  | -0.902575 |
| 41            | 1             | -4.327518               | -2.648620 | -0.163795 |
| 42            | 1             | -2.706800               | -3.348590 | -0.244869 |
| 43            | 1             | -3.237473               | -2.206798 | -1.491226 |
| 44            | 1             | -1.782277               | -2.845484 | 3.022191  |
| 45            | 1             | -0.191647               | -2.412314 | 2.380396  |
| 46            | 1             | -1.283877               | -3.430420 | 1.432010  |
| 47            | 1             | -1.806247               | 0.182610  | 4.158321  |
| 48            | 1             | -0.740137               | 1.367883  | 3.380389  |
| 49            | 1             | -0.211245               | -0.307375 | 3.555195  |
| 50            | 1             | -1.233431               | 2.560762  | -1.842390 |
| 51            | 1             | 0.370579                | 2.948926  | -2.438703 |
| 52            | 1             | 1.313224                | -3.256124 | -0.132133 |
| 53            | 1             | -0.312027               | -2.916646 | -0.719868 |
| 54            | 6             | -0.256690               | 4.161097  | -0.744515 |



|    |   |           |           |           |
|----|---|-----------|-----------|-----------|
| 55 | 1 | 0.749026  | 4.478898  | -0.446137 |
| 56 | 1 | -0.685768 | 4.952979  | -1.369724 |
| 57 | 1 | -0.864666 | 4.070544  | 0.160948  |
| 58 | 6 | 1.181514  | -2.830674 | -2.269747 |
| 59 | 1 | 1.064561  | -3.885660 | -2.545677 |
| 60 | 1 | 0.568881  | -2.220324 | -2.938221 |
| 61 | 1 | 2.231458  | -2.555173 | -2.416363 |

**TS13<sup>Et</sup>-14<sup>Et</sup>** (E = -1042.0887794 a.u.)

| Center Number | Atomic Number | Coordinates (Angstroms) |           |           |
|---------------|---------------|-------------------------|-----------|-----------|
|               |               | X                       | Y         | Z         |
| 1             | 22            | -1.027373               | -0.189999 | 0.333175  |
| 2             | 7             | 0.470339                | -1.338626 | 0.517842  |
| 3             | 6             | 1.094300                | -1.241597 | -0.732609 |
| 4             | 7             | 0.118179                | 1.442828  | -0.369520 |
| 5             | 6             | -3.195767               | -0.898721 | 1.071001  |
| 6             | 6             | -2.779382               | -1.734623 | -0.002718 |
| 7             | 6             | -3.421747               | 0.416496  | 0.550289  |
| 8             | 17            | -0.758584               | 0.712943  | 2.590473  |
| 9             | 6             | -2.701535               | -0.929561 | -1.178816 |
| 10            | 6             | -3.109882               | 0.402211  | -0.827953 |
| 11            | 6             | 1.106844                | -2.163870 | 1.557530  |
| 12            | 6             | 1.307235                | 1.207910  | -0.889601 |
| 13            | 6             | -0.329284               | 2.853723  | -0.236972 |
| 14            | 6             | 1.777660                | -0.103685 | -1.167957 |
| 15            | 1             | 1.309323                | -2.183509 | -1.247277 |
| 16            | 6             | 2.872736                | -0.005766 | -2.142852 |
| 17            | 1             | -0.503637               | -0.524308 | -1.274608 |
| 18            | 6             | 2.254042                | 2.188798  | -1.556464 |
| 19            | 6             | 3.180856                | 1.295741  | -2.354467 |
| 20            | 1             | 1.715222                | 2.902717  | -2.190496 |
| 21            | 1             | 2.811613                | 2.784755  | -0.824158 |
| 22            | 6             | 4.290144                | 1.887062  | -3.178100 |
| 23            | 6             | 3.542473                | -1.221799 | -2.726703 |
| 24            | 1             | 4.370813                | -0.952490 | -3.387931 |
| 25            | 1             | 2.832286                | -1.822665 | -3.310776 |
| 26            | 1             | 3.937992                | -1.870741 | -1.933551 |
| 27            | 1             | 4.893023                | 1.117809  | -3.670121 |
| 28            | 1             | 4.964469                | 2.494274  | -2.556643 |
| 29            | 1             | 3.895103                | 2.552289  | -3.959453 |
| 30            | 6             | -2.604757               | -3.233760 | 0.043989  |
| 31            | 6             | -3.515385               | -1.336327 | 2.477006  |
| 32            | 6             | -3.950974               | 1.572165  | 1.359366  |
| 33            | 6             | -3.269250               | 1.527176  | -1.821426 |
| 34            | 6             | -2.547730               | -1.442361 | -2.590110 |
| 35            | 1             | -3.542369               | -3.737127 | -0.233134 |
| 36            | 1             | -2.331632               | -3.579211 | 1.045582  |
| 37            | 1             | -1.829800               | -3.575002 | -0.649523 |
| 38            | 1             | -4.595210               | -1.514186 | 2.586414  |
| 39            | 1             | -3.218152               | -0.576500 | 3.204995  |
| 40            | 1             | -2.999581               | -2.265476 | 2.739679  |
| 41            | 1             | -4.995739               | 1.390354  | 1.647324  |
| 42            | 1             | -3.923375               | 2.510764  | 0.797174  |
| 43            | 1             | -3.368348               | 1.708716  | 2.276685  |
| 44            | 1             | -4.121581               | 1.334101  | -2.487720 |
| 45            | 1             | -2.380836               | 1.641252  | -2.453509 |
| 46            | 1             | -3.453722               | 2.484835  | -1.326040 |
| 47            | 1             | -3.529716               | -1.727536 | -2.995926 |
| 48            | 1             | -1.901613               | -2.324368 | -2.633048 |
| 49            | 1             | -2.119413               | -0.683363 | -3.251844 |
| 50            | 1             | 0.554994                | -1.983940 | 2.484235  |
| 51            | 1             | 2.130153                | -1.788883 | 1.715822  |
| 52            | 1             | -0.214088               | 3.363258  | -1.204571 |
| 53            | 1             | -1.397889               | 2.830237  | -0.011541 |
| 54            | 6             | 1.149477                | -3.669617 | 1.246153  |

|    |   |           |           |          |
|----|---|-----------|-----------|----------|
| 55 | 1 | 1.719942  | -3.883003 | 0.334503 |
| 56 | 1 | 1.632516  | -4.205550 | 2.071632 |
| 57 | 1 | 0.139195  | -4.072061 | 1.120242 |
| 58 | 6 | 0.394190  | 3.640967  | 0.867990 |
| 59 | 1 | -0.042072 | 4.643882  | 0.948441 |
| 60 | 1 | 0.281402  | 3.129976  | 1.826880 |
| 61 | 1 | 1.461990  | 3.754493  | 0.657328 |

**14<sup>Et</sup>** (E = -1042.1420389 a.u.)

| Center Number | Atomic Number | Coordinates (Angstroms) |           |           |
|---------------|---------------|-------------------------|-----------|-----------|
|               |               | X                       | Y         | Z         |
| 1             | 22            | -0.813270               | -0.020400 | -0.369014 |
| 2             | 7             | 0.028696                | 1.609837  | -0.857392 |
| 3             | 6             | 1.471702                | 1.807710  | -0.824849 |
| 4             | 7             | 0.655160                | -1.214706 | -0.677605 |
| 5             | 6             | -3.019690               | 0.077647  | 0.768312  |
| 6             | 6             | -2.121528               | 0.924945  | 1.455285  |
| 7             | 6             | -2.547920               | -1.274196 | 0.892700  |
| 8             | 17            | -2.074313               | -0.423281 | -2.318230 |
| 9             | 6             | -1.055272               | 0.114807  | 1.958082  |
| 10            | 6             | -1.357029               | -1.253535 | 1.652690  |
| 11            | 6             | -0.707656               | 2.720368  | -1.495876 |
| 12            | 6             | 1.893191                | -0.695209 | -0.335463 |
| 13            | 6             | 0.573899                | -2.627652 | -1.094866 |
| 14            | 6             | 2.262850                | 0.619760  | -0.346010 |
| 15            | 1             | 1.827775                | 2.097790  | -1.832316 |
| 16            | 6             | 3.649520                | 0.734909  | 0.146102  |
| 17            | 1             | 1.710246                | 2.663869  | -0.178260 |
| 18            | 6             | 3.056475                | -1.515752 | 0.192924  |
| 19            | 6             | 4.131330                | -0.492492 | 0.457939  |
| 20            | 1             | 2.775964                | -2.060719 | 1.103497  |
| 21            | 1             | 3.395364                | -2.271916 | -0.525588 |
| 22            | 6             | 5.492922                | -0.889802 | 0.957079  |
| 23            | 6             | 4.371166                | 2.056061  | 0.241891  |
| 24            | 1             | 5.402833                | 1.927364  | 0.581852  |
| 25            | 1             | 3.871206                | 2.735136  | 0.945910  |
| 26            | 1             | 4.401243                | 2.566225  | -0.730165 |
| 27            | 1             | 6.152543                | -0.024615 | 1.077942  |
| 28            | 1             | 5.984712                | -1.587664 | 0.263692  |
| 29            | 1             | 5.432971                | -1.399443 | 1.929657  |
| 30            | 6             | -2.301956               | 2.399044  | 1.714457  |
| 31            | 6             | -4.325887               | 0.470666  | 0.129665  |
| 32            | 6             | -3.284904               | -2.481574 | 0.371904  |
| 33            | 6             | -0.585484               | -2.444198 | 2.163884  |
| 34            | 6             | 0.070633                | 0.586310  | 2.846809  |
| 35            | 1             | -2.901151               | 2.554678  | 2.622983  |
| 36            | 1             | -2.820100               | 2.903829  | 0.892855  |
| 37            | 1             | -1.342548               | 2.901911  | 1.864304  |
| 38            | 1             | -5.168977               | 0.171848  | 0.769100  |
| 39            | 1             | -4.454286               | -0.013152 | -0.843921 |
| 40            | 1             | -4.394193               | 1.552367  | -0.022704 |
| 41            | 1             | -4.216626               | -2.638200 | 0.933686  |
| 42            | 1             | -2.688253               | -3.394372 | 0.465776  |
| 43            | 1             | -3.551449               | -2.359210 | -0.684019 |
| 44            | 1             | -0.874080               | -2.667787 | 3.200623  |
| 45            | 1             | 0.493978                | -2.263696 | 2.156632  |
| 46            | 1             | -0.777685               | -3.341997 | 1.569457  |
| 47            | 1             | -0.233320               | 0.557407  | 3.903554  |
| 48            | 1             | 0.363825                | 1.615228  | 2.616091  |
| 49            | 1             | 0.961357                | -0.041216 | 2.743262  |
| 50            | 1             | -1.778556               | 2.522932  | -1.381025 |
| 51            | 1             | -0.505982               | 2.685889  | -2.580493 |
| 52            | 1             | 1.145841                | -3.264027 | -0.404542 |
| 53            | 1             | -0.473506               | -2.936543 | -1.023778 |
| 54            | 6             | -0.388065               | 4.130975  | -0.968691 |

|    |   |           |           |           |
|----|---|-----------|-----------|-----------|
| 55 | 1 | 0.636779  | 4.435370  | -1.206631 |
| 56 | 1 | -1.063812 | 4.856572  | -1.436733 |
| 57 | 1 | -0.521706 | 4.193220  | 0.116430  |
| 58 | 6 | 1.061162  | -2.828817 | -2.539204 |
| 59 | 1 | 0.981125  | -3.884494 | -2.825538 |
| 60 | 1 | 0.452881  | -2.232515 | -3.225855 |
| 61 | 1 | 2.107080  | -2.521254 | -2.651145 |

**18<sup>Et</sup>** (E = -845.5421563 a.u.)

| Center Number | Atomic Number | Coordinates (Angstroms) |           |           |
|---------------|---------------|-------------------------|-----------|-----------|
|               |               | X                       | Y         | Z         |
| 1             | 22            | -0.175397               | -0.168256 | -0.492633 |
| 2             | 7             | -0.811305               | 1.399942  | -0.485928 |
| 3             | 6             | -1.787788               | -0.966441 | 1.037493  |
| 4             | 6             | -0.525819               | -1.017310 | 1.695036  |
| 5             | 6             | -1.755908               | -1.910851 | -0.026677 |
| 6             | 17            | 0.070477                | -0.781010 | -2.771011 |
| 7             | 6             | 0.253971                | -2.053754 | 1.080984  |
| 8             | 6             | -0.502695               | -2.602648 | 0.021049  |
| 9             | 6             | -0.152313               | -0.263572 | 2.949802  |
| 10            | 6             | -2.978892               | -0.147915 | 1.466492  |
| 11            | 6             | -2.889759               | -2.239060 | -0.967170 |
| 12            | 6             | -0.119514               | -3.751095 | -0.876432 |
| 13            | 6             | 1.597928                | -2.535985 | 1.568425  |
| 14            | 1             | -0.443807               | -0.828631 | 3.847150  |
| 15            | 1             | -0.651495               | 0.709914  | 2.997824  |
| 16            | 1             | 0.927390                | -0.088818 | 3.015814  |
| 17            | 1             | -3.587744               | -0.705861 | 2.192622  |
| 18            | 1             | -3.624003               | 0.104835  | 0.619209  |
| 19            | 1             | -2.674067               | 0.789917  | 1.941024  |
| 20            | 1             | -3.471218               | -3.092804 | -0.589105 |
| 21            | 1             | -2.518772               | -2.501835 | -1.962668 |
| 22            | 1             | -3.578271               | -1.395673 | -1.081472 |
| 23            | 1             | -0.712576               | -4.645589 | -0.639142 |
| 24            | 1             | 0.936453                | -4.017341 | -0.763046 |
| 25            | 1             | -0.289114               | -3.505734 | -1.930723 |
| 26            | 1             | 1.473760                | -3.275655 | 2.372154  |
| 27            | 1             | 2.204832                | -1.718372 | 1.972001  |
| 28            | 1             | 2.174105                | -3.016146 | 0.770722  |
| 29            | 7             | 1.954189                | 0.302192  | -0.131675 |
| 30            | 6             | 2.926846                | -0.371942 | -0.789296 |
| 31            | 6             | 2.319251                | 1.307710  | 0.698323  |
| 32            | 6             | 4.281094                | -0.072455 | -0.636567 |
| 33            | 1             | 2.593370                | -1.151553 | -1.463197 |
| 34            | 6             | 3.652408                | 1.659402  | 0.909341  |
| 35            | 1             | 1.510309                | 1.840773  | 1.180575  |
| 36            | 6             | 4.654889                | 0.958683  | 0.230505  |
| 37            | 1             | 5.020763                | -0.636852 | -1.191326 |
| 38            | 1             | 3.893251                | 2.472223  | 1.583822  |
| 39            | 1             | 5.699564                | 1.213970  | 0.369019  |
| 40            | 6             | -1.555107               | 2.635360  | -0.464347 |
| 41            | 1             | -2.469295               | 2.516054  | 0.140244  |
| 42            | 1             | -1.884634               | 2.875403  | -1.488328 |
| 43            | 6             | -0.736685               | 3.818314  | 0.088350  |
| 44            | 1             | -1.327353               | 4.742191  | 0.061433  |
| 45            | 1             | -0.438942               | 3.632414  | 1.127357  |
| 46            | 1             | 0.168781                | 3.969718  | -0.509674 |

**17<sup>Et</sup> M64** (E = -444.8549561 a.u.)

| Center Number | Atomic Number | Coordinates (Angstroms) |   |   |
|---------------|---------------|-------------------------|---|---|
|               |               | X                       | Y | Z |

|    |   |           |           |           |
|----|---|-----------|-----------|-----------|
| 1  | 7 | 1.238661  | 0.918134  | 0.398652  |
| 2  | 6 | 0.075039  | 0.434738  | 0.239467  |
| 3  | 6 | -1.160301 | 1.275873  | 0.181600  |
| 4  | 6 | -2.296479 | 0.361318  | -0.006071 |
| 5  | 6 | -0.369281 | -1.019356 | 0.083253  |
| 6  | 6 | -1.870514 | -0.920168 | -0.063099 |
| 7  | 1 | 0.094533  | -1.495992 | -0.789800 |
| 8  | 1 | -0.084949 | -1.626116 | 0.952278  |
| 9  | 6 | -2.684020 | -2.169745 | -0.243073 |
| 10 | 6 | -3.708488 | 0.871455  | -0.109676 |
| 11 | 1 | -4.431295 | 0.062557  | -0.244827 |
| 12 | 1 | -3.811260 | 1.562874  | -0.956696 |
| 13 | 1 | -3.988050 | 1.428063  | 0.794809  |
| 14 | 1 | -3.754157 | -1.965233 | -0.335280 |
| 15 | 1 | -2.540530 | -2.851775 | 0.607137  |
| 16 | 1 | -2.363713 | -2.715083 | -1.142300 |
| 17 | 6 | -1.190273 | 2.612837  | 0.285754  |
| 18 | 1 | -2.118365 | 3.169758  | 0.236117  |
| 19 | 1 | -0.271613 | 3.170001  | 0.422730  |
| 20 | 6 | 2.407222  | 0.030496  | 0.449417  |
| 21 | 1 | 2.755576  | 0.011725  | 1.492311  |
| 22 | 1 | 2.172256  | -1.006269 | 0.165626  |
| 23 | 6 | 3.529366  | 0.574653  | -0.445206 |
| 24 | 1 | 4.425938  | -0.049901 | -0.361389 |
| 25 | 1 | 3.215994  | 0.588505  | -1.495344 |
| 26 | 1 | 3.788257  | 1.598272  | -0.155158 |

**TS10<sup>Et</sup>-22<sup>Et</sup>** (E = -1042.0983571 a.u.)

| Center Number | Atomic Number | Coordinates (Angstroms) |           |           |
|---------------|---------------|-------------------------|-----------|-----------|
|               |               | X                       | Y         | Z         |
| 1             | 22            | -0.820792               | -0.019712 | -0.317402 |
| 2             | 7             | 0.399571                | 1.415619  | -0.807433 |
| 3             | 6             | 1.157783                | 1.535579  | 0.335518  |
| 4             | 7             | 0.775236                | -1.372883 | 0.023217  |
| 5             | 6             | -1.595464               | 0.271769  | 1.877628  |
| 6             | 6             | -2.011040               | -1.050137 | 1.520048  |
| 7             | 6             | -2.303347               | 1.194418  | 1.044914  |
| 8             | 17            | -1.404048               | -0.649756 | -2.541459 |
| 9             | 6             | -2.959543               | -0.945944 | 0.466873  |
| 10            | 6             | -3.128758               | 0.435898  | 0.164075  |
| 11            | 6             | 0.393765                | 2.450276  | -1.861640 |
| 12            | 6             | 1.932723                | -0.913743 | 0.339587  |
| 13            | 6             | 0.664580                | -2.828287 | -0.314719 |
| 14            | 6             | 2.168633                | 0.509138  | 0.778337  |
| 15            | 1             | 1.150766                | 2.469519  | 0.896855  |
| 16            | 6             | 3.662251                | 0.698372  | 0.455691  |
| 17            | 1             | 2.108416                | 0.474775  | 1.883407  |
| 18            | 6             | 3.270059                | -1.625363 | 0.289419  |
| 19            | 6             | 4.260186                | -0.478706 | 0.219660  |
| 20            | 1             | 3.412087                | -2.232191 | 1.197576  |
| 21            | 1             | 3.355632                | -2.313124 | -0.554516 |
| 22            | 6             | 5.710652                | -0.768236 | -0.058934 |
| 23            | 6             | 4.278310                | 2.066509  | 0.519799  |
| 24            | 1             | 5.345857                | 2.051813  | 0.282135  |
| 25            | 1             | 4.159300                | 2.501557  | 1.522939  |
| 26            | 1             | 3.779383                | 2.747670  | -0.181037 |
| 27            | 1             | 6.314040                | 0.143269  | -0.095086 |
| 28            | 1             | 5.828243                | -1.289809 | -1.019228 |
| 29            | 1             | 6.135958                | -1.423986 | 0.714470  |
| 30            | 6             | -1.627042               | -2.299013 | 2.276361  |
| 31            | 6             | -0.786089               | 0.615080  | 3.104716  |
| 32            | 6             | -2.308451               | 2.692140  | 1.219809  |
| 33            | 6             | -4.090903               | 0.988203  | -0.857555 |
| 34            | 6             | -3.702231               | -2.074523 | -0.202414 |
| 35            | 1             | -2.167017               | -2.346609 | 3.232876  |

|    |   |           |           |           |
|----|---|-----------|-----------|-----------|
| 36 | 1 | -0.556187 | -2.326102 | 2.507323  |
| 37 | 1 | -1.874571 | -3.208362 | 1.720088  |
| 38 | 1 | -1.413022 | 0.551016  | 4.007665  |
| 39 | 1 | -0.382917 | 1.629621  | 3.047955  |
| 40 | 1 | 0.056427  | -0.071279 | 3.246375  |
| 41 | 1 | -2.940219 | 2.977272  | 2.074065  |
| 42 | 1 | -2.703889 | 3.200676  | 0.335672  |
| 43 | 1 | -1.303049 | 3.082225  | 1.409324  |
| 44 | 1 | -5.101215 | 1.068910  | -0.430693 |
| 45 | 1 | -4.147806 | 0.344079  | -1.739990 |
| 46 | 1 | -3.794998 | 1.986396  | -1.196238 |
| 47 | 1 | -4.748969 | -2.101891 | 0.131965  |
| 48 | 1 | -3.257774 | -3.047811 | 0.029740  |
| 49 | 1 | -3.700870 | -1.959771 | -1.291592 |
| 50 | 1 | 1.308936  | -3.404136 | 0.361498  |
| 51 | 1 | 1.367733  | 2.401779  | -2.375781 |
| 52 | 1 | -0.371066 | 2.161667  | -2.589989 |
| 53 | 1 | -0.367704 | -3.116380 | -0.103452 |
| 54 | 6 | 0.987656  | -3.161732 | -1.779940 |
| 55 | 1 | 0.312398  | -2.629010 | -2.452119 |
| 56 | 1 | 2.015601  | -2.897041 | -2.046371 |
| 57 | 1 | 0.863383  | -4.239380 | -1.938333 |
| 58 | 6 | 0.150871  | 3.890936  | -1.385512 |
| 59 | 1 | 0.206352  | 4.577706  | -2.238500 |
| 60 | 1 | -0.838017 | 3.994498  | -0.928281 |
| 61 | 1 | 0.903789  | 4.206998  | -0.653890 |

**22<sup>Et</sup>** (E = -1042.1027081 a.u.)

| Center Number | Atomic Number | Coordinates (Angstroms) |           |           |
|---------------|---------------|-------------------------|-----------|-----------|
|               |               | X                       | Y         | Z         |
| 1             | 22            | 0.975802                | -0.180925 | 0.331267  |
| 2             | 7             | -0.285537               | 1.067662  | 1.353013  |
| 3             | 6             | -1.526414               | 1.310692  | 0.998218  |
| 4             | 7             | -0.750728               | -1.340378 | 0.297359  |
| 5             | 6             | 2.563192                | 1.204287  | -0.822022 |
| 6             | 6             | 1.346919                | 1.248641  | -1.564888 |
| 7             | 6             | 3.062772                | -0.128669 | -0.888234 |
| 8             | 17            | 2.222960                | -1.253024 | 2.006861  |
| 9             | 6             | 1.088464                | -0.061172 | -2.070185 |
| 10            | 6             | 2.142490                | -0.917644 | -1.639775 |
| 11            | 6             | 0.132706                | 1.559910  | 2.693104  |
| 12            | 6             | -1.904856               | -0.815960 | -0.009811 |
| 13            | 6             | -0.710814               | -2.771655 | 0.702232  |
| 14            | 6             | -2.055259               | 0.674588  | -0.259246 |
| 15            | 1             | -2.208518               | 1.833308  | 1.666188  |
| 16            | 6             | -3.543638               | 0.843657  | -0.498261 |
| 17            | 1             | -1.492035               | 1.015803  | -1.139346 |
| 18            | 6             | -3.255523               | -1.483169 | -0.145404 |
| 19            | 6             | -4.192371               | -0.329525 | -0.438018 |
| 20            | 1             | -3.255762               | -2.212666 | -0.971199 |
| 21            | 1             | -3.562887               | -2.045839 | 0.745732  |
| 22            | 6             | -5.661359               | -0.599177 | -0.624798 |
| 23            | 6             | -4.106696               | 2.210032  | -0.787035 |
| 24            | 1             | -5.183382               | 2.182261  | -0.977745 |
| 25            | 1             | -3.618917               | 2.652799  | -1.666716 |
| 26            | 1             | -3.931418               | 2.897671  | 0.051211  |
| 27            | 1             | -6.228423               | 0.310449  | -0.842019 |
| 28            | 1             | -6.091053               | -1.057192 | 0.277155  |
| 29            | 1             | -5.826854               | -1.306490 | -1.449724 |
| 30            | 6             | 0.590802                | 2.520431  | -1.878042 |
| 31            | 6             | 3.285040                | 2.394979  | -0.238976 |
| 32            | 6             | 4.407760                | -0.585957 | -0.383845 |
| 33            | 6             | 2.330951                | -2.360076 | -2.042953 |
| 34            | 6             | -0.005650               | -0.475776 | -3.026111 |
| 35            | 1             | 1.238966                | 3.221906  | -2.420941 |

|    |   |           |           |           |
|----|---|-----------|-----------|-----------|
| 36 | 1 | 0.238587  | 3.030586  | -0.973969 |
| 37 | 1 | -0.279134 | 2.328355  | -2.513332 |
| 38 | 1 | 4.019954  | 2.796861  | -0.953325 |
| 39 | 1 | 3.828764  | 2.134256  | 0.675662  |
| 40 | 1 | 2.589358  | 3.204137  | 0.005109  |
| 41 | 1 | 5.173700  | -0.425337 | -1.156949 |
| 42 | 1 | 4.406110  | -1.649204 | -0.128131 |
| 43 | 1 | 4.714456  | -0.035993 | 0.510752  |
| 44 | 1 | 2.930861  | -2.438052 | -2.962388 |
| 45 | 1 | 1.371364  | -2.851411 | -2.236066 |
| 46 | 1 | 2.848376  | -2.932761 | -1.265730 |
| 47 | 1 | 0.405246  | -0.615732 | -4.035977 |
| 48 | 1 | -0.797716 | 0.275174  | -3.099265 |
| 49 | 1 | -0.472477 | -1.421039 | -2.728028 |
| 50 | 1 | 0.304555  | -3.134065 | 0.523216  |
| 51 | 1 | -0.656666 | 1.307351  | 3.416148  |
| 52 | 1 | -1.384297 | -3.353550 | 0.058311  |
| 53 | 1 | 1.033855  | 1.012980  | 2.982622  |
| 54 | 6 | 0.405932  | 3.070591  | 2.713888  |
| 55 | 1 | 0.741429  | 3.379945  | 3.710666  |
| 56 | 1 | 1.187444  | 3.332550  | 1.993099  |
| 57 | 1 | -0.496461 | 3.640394  | 2.464311  |
| 58 | 6 | -1.073337 | -2.974662 | 2.181547  |
| 59 | 1 | -0.366850 | -2.437025 | 2.819847  |
| 60 | 1 | -2.084513 | -2.615450 | 2.400715  |
| 61 | 1 | -1.026444 | -4.040420 | 2.434689  |

TS22<sup>Et</sup>-23<sup>Et</sup> (E = -1042.0741945 a.u.)

| Center Number | Atomic Number | Coordinates (Angstroms) |           |           |
|---------------|---------------|-------------------------|-----------|-----------|
|               |               | X                       | Y         | Z         |
| 1             | 22            | -0.704114               | 0.322718  | -0.357610 |
| 2             | 7             | 0.530422                | 1.816853  | -1.138459 |
| 3             | 6             | 1.805040                | 1.603085  | -0.891541 |
| 4             | 7             | 0.629928                | -1.183090 | -0.915040 |
| 5             | 6             | -1.838277               | 1.278721  | 1.505166  |
| 6             | 6             | -0.990501               | 0.242558  | 2.000837  |
| 7             | 6             | -2.840560               | 0.681306  | 0.685580  |
| 8             | 17            | -1.826148               | 0.253604  | -2.518127 |
| 9             | 6             | -1.473620               | -0.996043 | 1.474044  |
| 10            | 6             | -2.616593               | -0.725024 | 0.668963  |
| 11            | 6             | 0.194979                | 2.887849  | -2.103036 |
| 12            | 6             | 1.866829                | -0.869016 | -0.618239 |
| 13            | 6             | 0.333996                | -2.471540 | -1.579586 |
| 14            | 6             | 2.150759                | 0.455164  | -0.074160 |
| 15            | 1             | 2.574860                | 2.248516  | -1.314641 |
| 16            | 6             | 3.527433                | 0.343826  | 0.517836  |
| 17            | 1             | 0.913387                | 0.538381  | 0.663094  |
| 18            | 6             | 3.102308                | -1.730545 | -0.535828 |
| 19            | 6             | 4.053351                | -0.875245 | 0.282594  |
| 20            | 1             | 2.886185                | -2.697088 | -0.062789 |
| 21            | 1             | 3.532194                | -1.961506 | -1.519880 |
| 22            | 6             | 5.399112                | -1.418482 | 0.677913  |
| 23            | 6             | 4.148031                | 1.495797  | 1.263118  |
| 24            | 1             | 5.154996                | 1.262105  | 1.620846  |
| 25            | 1             | 3.533524                | 1.772206  | 2.130564  |
| 26            | 1             | 4.217264                | 2.388566  | 0.627447  |
| 27            | 1             | 5.983831                | -0.694290 | 1.252812  |
| 28            | 1             | 5.987352                | -1.695915 | -0.208567 |
| 29            | 1             | 5.296937                | -2.327783 | 1.287610  |
| 30            | 6             | 0.014796                | 0.390395  | 3.116983  |
| 31            | 6             | -1.760257               | 2.728879  | 1.921754  |
| 32            | 6             | -4.009018               | 1.374893  | 0.032154  |
| 33            | 6             | -3.504870               | -1.731376 | -0.018450 |
| 34            | 6             | -0.937673               | -2.358301 | 1.844339  |
| 35            | 1             | -0.483781               | 0.288138  | 4.093087  |

|    |   |           |           |           |
|----|---|-----------|-----------|-----------|
| 36 | 1 | 0.502749  | 1.369667  | 3.094256  |
| 37 | 1 | 0.797791  | -0.372298 | 3.062874  |
| 38 | 1 | -2.210145 | 2.865980  | 2.915734  |
| 39 | 1 | -2.295509 | 3.382269  | 1.227175  |
| 40 | 1 | -0.724510 | 3.080361  | 1.977852  |
| 41 | 1 | -4.923314 | 1.223108  | 0.623799  |
| 42 | 1 | -4.187581 | 0.986082  | -0.974916 |
| 43 | 1 | -3.847711 | 2.454226  | -0.051503 |
| 44 | 1 | -4.446666 | -1.855491 | 0.535007  |
| 45 | 1 | -3.030549 | -2.716013 | -0.080842 |
| 46 | 1 | -3.751583 | -1.412461 | -1.036293 |
| 47 | 1 | -1.365670 | -2.694230 | 2.799725  |
| 48 | 1 | 0.151335  | -2.345794 | 1.957767  |
| 49 | 1 | -1.185632 | -3.113301 | 1.092100  |
| 50 | 1 | -0.730995 | -2.675670 | -1.440533 |
| 51 | 1 | 1.120014  | 3.396495  | -2.409997 |
| 52 | 1 | 0.892048  | -3.278281 | -1.082638 |
| 53 | 1 | -0.242468 | 2.411471  | -2.986759 |
| 54 | 6 | -0.793477 | 3.905332  | -1.524981 |
| 55 | 1 | -1.012853 | 4.679722  | -2.269178 |
| 56 | 1 | -1.738021 | 3.420970  | -1.256351 |
| 57 | 1 | -0.384030 | 4.390768  | -0.631913 |
| 58 | 6 | 0.654340  | -2.444848 | -3.081728 |
| 59 | 1 | 0.076433  | -1.655848 | -3.570669 |
| 60 | 1 | 1.719786  | -2.259241 | -3.258154 |
| 61 | 1 | 0.394623  | -3.406723 | -3.539252 |

**23<sup>Et</sup>** (E = -1042.110676 a.u.)

| Center Number | Atomic Number | Coordinates (Angstroms) |           |           |
|---------------|---------------|-------------------------|-----------|-----------|
|               |               | X                       | Y         | Z         |
| 1             | 22            | -0.775552               | 0.100707  | -0.120046 |
| 2             | 7             | 0.327647                | 1.858436  | -0.613122 |
| 3             | 6             | 1.620817                | 1.877368  | -0.350405 |
| 4             | 7             | 0.861278                | -1.029898 | -0.576558 |
| 5             | 6             | -2.478309               | 0.524969  | 1.517160  |
| 6             | 6             | -1.535641               | -0.409133 | 2.054190  |
| 7             | 6             | -3.144277               | -0.097979 | 0.429180  |
| 8             | 17            | -1.547073               | 0.234887  | -2.461676 |
| 9             | 6             | -1.632630               | -1.612937 | 1.288867  |
| 10            | 6             | -2.619198               | -1.416883 | 0.281050  |
| 11            | 6             | -0.187882               | 3.036494  | -1.355770 |
| 12            | 6             | 2.054615                | -0.580516 | -0.193614 |
| 13            | 6             | 0.791551                | -2.352919 | -1.243836 |
| 14            | 6             | 2.404953                | 0.771401  | 0.024769  |
| 15            | 1             | 2.152856                | 2.818244  | -0.510466 |
| 16            | 6             | 3.827937                | 0.828159  | 0.415198  |
| 17            | 1             | 0.181789                | 0.508783  | 1.155350  |
| 18            | 6             | 3.302338                | -1.420547 | 0.025986  |
| 19            | 6             | 4.353883                | -0.416420 | 0.436220  |
| 20            | 1             | 3.120787                | -2.180671 | 0.797434  |
| 21            | 1             | 3.599924                | -1.965683 | -0.877117 |
| 22            | 6             | 5.752464                | -0.857089 | 0.767987  |
| 23            | 6             | 4.526164                | 2.127174  | 0.723163  |
| 24            | 1             | 5.548001                | 1.964019  | 1.077135  |
| 25            | 1             | 3.985403                | 2.690757  | 1.495146  |
| 26            | 1             | 4.583046                | 2.770557  | -0.165791 |
| 27            | 1             | 6.389001                | -0.016525 | 1.061080  |
| 28            | 1             | 6.229186                | -1.350755 | -0.091556 |
| 29            | 1             | 5.757103                | -1.583638 | 1.593445  |
| 30            | 6             | -0.828137               | -0.274766 | 3.379491  |
| 31            | 6             | -2.788187               | 1.867872  | 2.134190  |
| 32            | 6             | -4.285229               | 0.463872  | -0.377435 |
| 33            | 6             | -3.134697               | -2.431900 | -0.707145 |
| 34            | 6             | -0.929868               | -2.901025 | 1.644673  |
| 35            | 1             | -1.472827               | -0.648284 | 4.189070  |

|    |   |           |           |           |
|----|---|-----------|-----------|-----------|
| 36 | 1 | -0.580122 | 0.767463  | 3.599724  |
| 37 | 1 | 0.102828  | -0.848875 | 3.399598  |
| 38 | 1 | -3.347658 | 1.734481  | 3.071009  |
| 39 | 1 | -3.398301 | 2.489401  | 1.473599  |
| 40 | 1 | -1.877409 | 2.427309  | 2.374210  |
| 41 | 1 | -5.235473 | 0.022455  | -0.044127 |
| 42 | 1 | -4.162015 | 0.245352  | -1.442020 |
| 43 | 1 | -4.368659 | 1.549233  | -0.266598 |
| 44 | 1 | -4.157518 | -2.735531 | -0.443600 |
| 45 | 1 | -2.519403 | -3.336850 | -0.722025 |
| 46 | 1 | -3.156932 | -2.019916 | -1.721521 |
| 47 | 1 | -1.382573 | -3.342939 | 2.543353  |
| 48 | 1 | 0.132427  | -2.740538 | 1.857552  |
| 49 | 1 | -1.003719 | -3.642759 | 0.844985  |
| 50 | 1 | -0.247778 | -2.686596 | -1.211127 |
| 51 | 1 | 0.628556  | 3.761809  | -1.482531 |
| 52 | 1 | 1.384483  | -3.090280 | -0.684920 |
| 53 | 1 | -0.486118 | 2.689091  | -2.350163 |
| 54 | 6 | -1.377871 | 3.714487  | -0.672361 |
| 55 | 1 | -1.693681 | 4.588534  | -1.254159 |
| 56 | 1 | -2.231356 | 3.032521  | -0.607354 |
| 57 | 1 | -1.118613 | 4.048580  | 0.338529  |
| 58 | 6 | 1.244717  | -2.289481 | -2.711717 |
| 59 | 1 | 0.613609  | -1.588020 | -3.264232 |
| 60 | 1 | 2.286005  | -1.960239 | -2.799199 |
| 61 | 1 | 1.159984  | -3.280093 | -3.174497 |

TS22<sup>Et</sup>-25<sup>Et</sup> (E = -1042.0869102 a.u.)

| Center Number | Atomic Number | Coordinates (Angstroms) |           |           |
|---------------|---------------|-------------------------|-----------|-----------|
|               |               | X                       | Y         | Z         |
| 1             | 22            | -0.905882               | -0.089887 | -0.366237 |
| 2             | 7             | 0.271310                | 1.349764  | -0.977621 |
| 3             | 6             | 1.621954                | 1.254652  | -0.744735 |
| 4             | 7             | 0.718207                | -1.164483 | -0.680357 |
| 5             | 6             | -2.567166               | 1.019330  | 1.029069  |
| 6             | 6             | -1.400489               | 0.743279  | 1.800829  |
| 7             | 6             | -3.164404               | -0.220896 | 0.678441  |
| 8             | 17            | -2.107707               | -0.582736 | -2.320900 |
| 9             | 6             | -1.274720               | -0.678307 | 1.919971  |
| 10            | 6             | -2.363224               | -1.269772 | 1.216886  |
| 11            | 6             | -0.131322               | 2.308572  | -2.031579 |
| 12            | 6             | 1.941818                | -0.560287 | -0.507112 |
| 13            | 6             | 0.690610                | -2.458201 | -1.400620 |
| 14            | 6             | 2.137317                | 0.552212  | 0.468960  |
| 15            | 1             | 2.311762                | 1.864106  | -1.322587 |
| 16            | 6             | 3.626527                | 0.656311  | 0.660061  |
| 17            | 1             | 1.520565                | 0.600725  | 1.366793  |
| 18            | 6             | 3.306788                | -1.115517 | -0.884408 |
| 19            | 6             | 4.270717                | -0.241042 | -0.103882 |
| 20            | 1             | 3.420150                | -2.170309 | -0.595362 |
| 21            | 1             | 3.506305                | -1.077562 | -1.963213 |
| 22            | 6             | 5.753561                | -0.446626 | -0.258601 |
| 23            | 6             | 4.201064                | 1.706803  | 1.572855  |
| 24            | 1             | 5.295131                | 1.698016  | 1.578771  |
| 25            | 1             | 3.857773                | 1.558755  | 2.606234  |
| 26            | 1             | 3.871958                | 2.710222  | 1.268849  |
| 27            | 1             | 6.336243                | 0.233603  | 0.369664  |
| 28            | 1             | 6.063965                | -0.292594 | -1.301622 |
| 29            | 1             | 6.033543                | -1.476047 | 0.006692  |
| 30            | 6             | -0.594417               | 1.790311  | 2.534924  |
| 31            | 6             | -3.127946               | 2.391276  | 0.744290  |
| 32            | 6             | -4.485179               | -0.407831 | -0.019317 |
| 33            | 6             | -2.703909               | -2.738266 | 1.143488  |
| 34            | 6             | -0.282643               | -1.416881 | 2.786861  |
| 35            | 1             | -1.218808               | 2.283539  | 3.292902  |



|    |   |           |           |           |
|----|---|-----------|-----------|-----------|
| 36 | 1 | -0.213003 | 2.567359  | 1.863223  |
| 37 | 1 | 0.259759  | 1.350524  | 3.058020  |
| 38 | 1 | -3.867932 | 2.675930  | 1.506649  |
| 39 | 1 | -3.629630 | 2.434428  | -0.228619 |
| 40 | 1 | -2.342786 | 3.153664  | 0.750870  |
| 41 | 1 | -5.281416 | -0.580563 | 0.719410  |
| 42 | 1 | -4.465915 | -1.263486 | -0.700684 |
| 43 | 1 | -4.760486 | 0.472815  | -0.606830 |
| 44 | 1 | -3.524294 | -2.979743 | 1.834855  |
| 45 | 1 | -1.851632 | -3.366767 | 1.417766  |
| 46 | 1 | -3.029641 | -3.031681 | 0.138845  |
| 47 | 1 | -0.690028 | -1.560224 | 3.798015  |
| 48 | 1 | 0.661859  | -0.873990 | 2.887671  |
| 49 | 1 | -0.046522 | -2.404644 | 2.380733  |
| 50 | 1 | 1.448659  | -2.436909 | -2.196209 |
| 51 | 1 | 0.491672  | 2.126743  | -2.921859 |
| 52 | 1 | -0.280102 | -2.546718 | -1.897675 |
| 53 | 1 | -1.162892 | 2.086053  | -2.319219 |
| 54 | 6 | -0.015155 | 3.779952  | -1.603582 |
| 55 | 1 | -0.330323 | 4.440217  | -2.420821 |
| 56 | 1 | -0.649493 | 3.983624  | -0.733871 |
| 57 | 1 | 1.017225  | 4.035180  | -1.337936 |
| 58 | 6 | 0.912961  | -3.682608 | -0.496085 |
| 59 | 1 | 1.875057  | -3.633441 | 0.025356  |
| 60 | 1 | 0.123366  | -3.752423 | 0.258928  |
| 61 | 1 | 0.894537  | -4.602232 | -1.094294 |

**25<sup>Et</sup>** (E = -1042.1237791 a.u.)

| Center Number | Atomic Number | Coordinates (Angstroms) |           |           |
|---------------|---------------|-------------------------|-----------|-----------|
|               |               | X                       | Y         | Z         |
| 1             | 22            | 0.706006                | -0.038935 | 0.281655  |
| 2             | 7             | -0.279614               | 1.570239  | 0.211016  |
| 3             | 6             | -1.548566               | 0.948597  | 0.400318  |
| 4             | 7             | -0.537172               | -1.157371 | -0.605816 |
| 5             | 6             | 2.479257                | 1.102349  | -0.874862 |
| 6             | 6             | 2.301245                | -0.170005 | -1.499572 |
| 7             | 6             | 2.924424                | 0.881094  | 0.455452  |
| 8             | 17            | 0.455385                | -0.582907 | 2.578777  |
| 9             | 6             | 2.672898                | -1.176427 | -0.562951 |
| 10            | 6             | 3.040532                | -0.529142 | 0.648632  |
| 11            | 6             | -1.702408               | -0.534568 | -0.059118 |
| 12            | 6             | -2.464605               | 0.582789  | -0.768029 |
| 13            | 1             | -2.048533               | 1.174907  | 1.343973  |
| 14            | 6             | -3.902479               | 0.403203  | -0.405176 |
| 15            | 1             | -2.161497               | 0.922285  | -1.752482 |
| 16            | 6             | -2.749303               | -1.321018 | 0.744142  |
| 17            | 6             | -4.060908               | -0.613095 | 0.462846  |
| 18            | 1             | -2.797729               | -2.363877 | 0.413684  |
| 19            | 1             | -2.495522               | -1.344792 | 1.808940  |
| 20            | 6             | -5.323515               | -1.087703 | 1.130788  |
| 21            | 6             | -4.946563               | 1.339049  | -0.956991 |
| 22            | 1             | -5.956110               | 1.071288  | -0.630931 |
| 23            | 1             | -4.934003               | 1.331816  | -2.055799 |
| 24            | 1             | -4.753069               | 2.374494  | -0.643255 |
| 25            | 1             | -6.203677               | -0.524473 | 0.805642  |
| 26            | 1             | -5.250765               | -0.996531 | 2.223646  |
| 27            | 1             | -5.502757               | -2.150747 | 0.913626  |
| 28            | 6             | 2.002215                | -0.348893 | -2.967778 |
| 29            | 6             | 2.389096                | 2.414300  | -1.612477 |
| 30            | 6             | 3.304854                | 1.919678  | 1.481979  |
| 31            | 6             | 3.627824                | -1.198787 | 1.863502  |
| 32            | 6             | 2.817839                | -2.654467 | -0.828938 |
| 33            | 1             | 2.834091                | 0.042991  | -3.570260 |
| 34            | 1             | 1.096923                | 0.186692  | -3.274878 |
| 35            | 1             | 1.878609                | -1.401636 | -3.234723 |

|    |   |           |           |           |
|----|---|-----------|-----------|-----------|
| 36 | 1 | 3.185594  | 2.469366  | -2.367896 |
| 37 | 1 | 2.516024  | 3.270506  | -0.945148 |
| 38 | 1 | 1.433428  | 2.529468  | -2.133750 |
| 39 | 1 | 4.395276  | 1.945534  | 1.615725  |
| 40 | 1 | 2.858518  | 1.702646  | 2.458612  |
| 41 | 1 | 2.986879  | 2.922992  | 1.184521  |
| 42 | 1 | 4.721869  | -1.259508 | 1.766154  |
| 43 | 1 | 3.246031  | -2.215767 | 1.992021  |
| 44 | 1 | 3.397645  | -0.646525 | 2.778011  |
| 45 | 1 | 3.867508  | -2.894861 | -1.050639 |
| 46 | 1 | 2.219773  | -2.980653 | -1.683556 |
| 47 | 1 | 2.522951  | -3.255795 | 0.036762  |
| 48 | 6 | -0.241588 | 3.010914  | 0.467191  |
| 49 | 6 | -0.739497 | -2.238965 | -1.578767 |
| 50 | 1 | 0.803361  | 3.327770  | 0.468634  |
| 51 | 1 | -0.630965 | 3.195985  | 1.483426  |
| 52 | 1 | 0.049670  | -2.164347 | -2.333214 |
| 53 | 1 | -1.692615 | -2.070258 | -2.103517 |
| 54 | 6 | -0.718402 | -3.659394 | -0.981656 |
| 55 | 1 | -0.780201 | -4.403723 | -1.785699 |
| 56 | 1 | 0.205909  | -3.830189 | -0.422579 |
| 57 | 1 | -1.556135 | -3.828235 | -0.299294 |
| 58 | 6 | -1.042566 | 3.852671  | -0.541401 |
| 59 | 1 | -2.102996 | 3.578923  | -0.531169 |
| 60 | 1 | -0.964846 | 4.917148  | -0.289926 |
| 61 | 1 | -0.663504 | 3.709961  | -1.559473 |

**TS10<sup>Et</sup>-24<sup>Et</sup>** (E = -1042.0886316 a.u.)

| Center Number | Atomic Number | Coordinates (Angstroms) |           |           |
|---------------|---------------|-------------------------|-----------|-----------|
|               |               | X                       | Y         | Z         |
| 1             | 22            | -0.091784               | -0.426825 | 0.295562  |
| 2             | 7             | 1.726461                | 0.295266  | -0.148592 |
| 3             | 6             | 1.644456                | 0.699475  | -1.403293 |
| 4             | 7             | -1.410030               | 0.844758  | -0.569636 |
| 5             | 6             | -0.256609               | -2.335745 | -1.115053 |
| 6             | 6             | -1.601167               | -2.169557 | -0.657266 |
| 7             | 6             | 0.556635                | -2.676380 | 0.007388  |
| 8             | 17            | -0.093277               | 0.335903  | 2.551204  |
| 9             | 6             | -1.612377               | -2.325290 | 0.745215  |
| 10            | 6             | -0.273251               | -2.627342 | 1.163924  |
| 11            | 6             | -0.571805               | 1.823333  | -0.867164 |
| 12            | 6             | 0.578075                | 1.649482  | -1.848663 |
| 13            | 1             | 2.407511                | 0.421623  | -2.131969 |
| 14            | 6             | 1.085062                | 3.072035  | -2.078145 |
| 15            | 1             | 0.139628                | 1.264361  | -2.784509 |
| 16            | 6             | -0.704989               | 3.296344  | -0.531486 |
| 17            | 6             | 0.371554                | 3.957065  | -1.366212 |
| 18            | 1             | -1.706310               | 3.685475  | -0.766716 |
| 19            | 1             | -0.553423               | 3.485575  | 0.540421  |
| 20            | 6             | 0.520886                | 5.453964  | -1.318626 |
| 21            | 6             | 2.217772                | 3.335547  | -3.034125 |
| 22            | 1             | 2.445437                | 4.402161  | -3.116898 |
| 23            | 1             | 1.975160                | 2.963944  | -4.040155 |
| 24            | 1             | 3.135668                | 2.823702  | -2.716298 |
| 25            | 1             | 1.338509                | 5.815639  | -1.948629 |
| 26            | 1             | 0.712533                | 5.788199  | -0.289104 |
| 27            | 1             | -0.404444               | 5.948991  | -1.645737 |
| 28            | 6             | -2.777861               | -1.981565 | -1.579903 |
| 29            | 6             | 0.154811                | -2.401390 | -2.567722 |
| 30            | 6             | 1.956688                | -3.234596 | -0.062510 |
| 31            | 6             | 0.121814                | -3.038148 | 2.560367  |
| 32            | 6             | -2.803431               | -2.269359 | 1.669902  |
| 33            | 1             | -2.873231               | -2.849472 | -2.247035 |
| 34            | 1             | -2.665347               | -1.092831 | -2.212107 |
| 35            | 1             | -3.718978               | -1.891228 | -1.029366 |

|    |   |           |           |           |
|----|---|-----------|-----------|-----------|
| 36 | 1 | -0.071182 | -3.393405 | -2.988563 |
| 37 | 1 | 1.227860  | -2.228583 | -2.694624 |
| 38 | 1 | -0.376571 | -1.660246 | -3.174508 |
| 39 | 1 | 1.923529  | -4.306042 | -0.309410 |
| 40 | 1 | 2.484620  | -3.141278 | 0.891675  |
| 41 | 1 | 2.560554  | -2.744332 | -0.832640 |
| 42 | 1 | -0.076275 | -4.109367 | 2.714572  |
| 43 | 1 | -0.436951 | -2.477230 | 3.314481  |
| 44 | 1 | 1.186042  | -2.866217 | 2.751047  |
| 45 | 1 | -3.059636 | -3.273384 | 2.037342  |
| 46 | 1 | -3.689037 | -1.866570 | 1.168301  |
| 47 | 1 | -2.600437 | -1.642143 | 2.545449  |
| 48 | 6 | 3.032214  | -0.037863 | 0.471707  |
| 49 | 6 | -2.825088 | 1.152629  | -0.232239 |
| 50 | 1 | 2.899625  | -0.936071 | 1.078661  |
| 51 | 1 | 3.228673  | 0.781701  | 1.177624  |
| 52 | 1 | -3.371464 | 0.212595  | -0.329338 |
| 53 | 1 | -3.214714 | 1.833800  | -1.003499 |
| 54 | 6 | -3.100041 | 1.736848  | 1.162895  |
| 55 | 1 | -2.632671 | 2.715482  | 1.303158  |
| 56 | 1 | -4.182949 | 1.856814  | 1.291485  |
| 57 | 1 | -2.723819 | 1.074624  | 1.945900  |
| 58 | 6 | 4.234286  | -0.200015 | -0.465700 |
| 59 | 1 | 4.445779  | 0.719238  | -1.023155 |
| 60 | 1 | 5.121310  | -0.436482 | 0.132135  |
| 61 | 1 | 4.090623  | -1.013761 | -1.185133 |

**24<sup>Et</sup>** (E = -1042.1123718 a.u.)

| Center Number | Atomic Number | Coordinates (Angstroms) |           |           |
|---------------|---------------|-------------------------|-----------|-----------|
|               |               | X                       | Y         | Z         |
| 1             | 22            | 0.173832                | -0.812490 | -0.452612 |
| 2             | 7             | -1.458472               | 0.697905  | -0.144481 |
| 3             | 6             | -1.059390               | 1.825817  | 0.308640  |
| 4             | 7             | 1.728920                | -0.078190 | 0.277265  |
| 5             | 6             | 0.152499                | -2.442270 | 1.312256  |
| 6             | 6             | 0.883942                | -3.028107 | 0.239719  |
| 7             | 6             | -1.205760               | -2.305033 | 0.893997  |
| 8             | 17            | 0.099355                | -0.730731 | -2.832434 |
| 9             | 6             | -0.023026               | -3.246714 | -0.835883 |
| 10            | 6             | -1.312888               | -2.803010 | -0.436860 |
| 11            | 6             | 1.183709                | 1.035181  | -0.355368 |
| 12            | 6             | 0.409362                | 2.079027  | 0.482100  |
| 13            | 1             | -1.769934               | 2.626444  | 0.518305  |
| 14            | 6             | 0.829552                | 3.430396  | -0.082164 |
| 15            | 1             | 0.641714                | 2.019471  | 1.560005  |
| 16            | 6             | 1.886887                | 1.816782  | -1.474260 |
| 17            | 6             | 1.636600                | 3.271023  | -1.144071 |
| 18            | 1             | 2.960679                | 1.600525  | -1.526020 |
| 19            | 1             | 1.486078                | 1.572554  | -2.466147 |
| 20            | 6             | 2.273732                | 4.345517  | -1.985330 |
| 21            | 6             | 0.371238                | 4.712495  | 0.565899  |
| 22            | 1             | 0.783821                | 5.595583  | 0.068463  |
| 23            | 1             | 0.680028                | 4.746922  | 1.620924  |
| 24            | 1             | -0.723698               | 4.810642  | 0.552810  |
| 25            | 1             | 2.001863                | 5.355646  | -1.663745 |
| 26            | 1             | 1.977908                | 4.232651  | -3.037653 |
| 27            | 1             | 3.369257                | 4.262155  | -1.955597 |
| 28            | 6             | 2.314883                | -3.513541 | 0.254563  |
| 29            | 6             | 0.614521                | -2.217667 | 2.733167  |
| 30            | 6             | -2.326584               | -1.930183 | 1.836955  |
| 31            | 6             | -2.561678               | -2.976036 | -1.267062 |
| 32            | 6             | 0.293979                | -3.971599 | -2.117776 |
| 33            | 1             | 2.344316                | -4.610433 | 0.195697  |
| 34            | 1             | 2.834783                | -3.222199 | 1.171048  |
| 35            | 1             | 2.892190                | -3.125208 | -0.591983 |

|    |   |           |           |           |
|----|---|-----------|-----------|-----------|
| 36 | 1 | 0.045650  | -2.859763 | 3.420683  |
| 37 | 1 | 0.474402  | -1.182143 | 3.065642  |
| 38 | 1 | 1.671400  | -2.465626 | 2.860109  |
| 39 | 1 | -2.316106 | -2.597106 | 2.710087  |
| 40 | 1 | -3.307997 | -2.037377 | 1.365621  |
| 41 | 1 | -2.242271 | -0.904611 | 2.217743  |
| 42 | 1 | -2.760038 | -4.042136 | -1.443668 |
| 43 | 1 | -2.462765 | -2.495984 | -2.248050 |
| 44 | 1 | -3.444375 | -2.558809 | -0.773326 |
| 45 | 1 | 0.082399  | -5.046086 | -2.009226 |
| 46 | 1 | 1.348227  | -3.865958 | -2.391952 |
| 47 | 1 | -0.301351 | -3.589642 | -2.951289 |
| 48 | 6 | -2.878721 | 0.499488  | -0.532080 |
| 49 | 6 | 2.840944  | -0.095252 | 1.226611  |
| 50 | 1 | -3.255676 | -0.354259 | 0.032390  |
| 51 | 1 | -2.846358 | 0.189784  | -1.583250 |
| 52 | 1 | 2.610144  | 0.590854  | 2.060311  |
| 53 | 1 | 2.913626  | -1.098230 | 1.652695  |
| 54 | 6 | 4.202689  | 0.294659  | 0.623966  |
| 55 | 1 | 4.208760  | 1.336581  | 0.289432  |
| 56 | 1 | 4.990979  | 0.177769  | 1.378102  |
| 57 | 1 | 4.446127  | -0.343847 | -0.232430 |
| 58 | 6 | -3.829747 | 1.688526  | -0.370118 |
| 59 | 1 | -4.822433 | 1.393138  | -0.726583 |
| 60 | 1 | -3.933607 | 1.998483  | 0.676408  |
| 61 | 1 | -3.510684 | 2.554459  | -0.961214 |

TS24<sup>Et</sup>-25<sup>Et</sup> (E = -1042.096092 a.u.)

| Center Number | Atomic Number | Coordinates (Angstroms) |           |           |
|---------------|---------------|-------------------------|-----------|-----------|
|               |               | X                       | Y         | Z         |
| 1             | 22            | 0.053152                | -0.758290 | -0.407371 |
| 2             | 7             | -1.476315               | 0.651364  | 0.176401  |
| 3             | 6             | -0.847965               | 1.754443  | -0.150879 |
| 4             | 7             | 1.667049                | -0.049500 | 0.226380  |
| 5             | 6             | 0.010073                | -2.401190 | 1.331785  |
| 6             | 6             | 0.838287                | -2.921283 | 0.296721  |
| 7             | 6             | -1.333445               | -2.356388 | 0.840702  |
| 8             | 17            | -0.243698               | -0.561569 | -2.769783 |
| 9             | 6             | 0.018310                | -3.134477 | -0.844558 |
| 10            | 6             | -1.329428               | -2.804640 | -0.503008 |
| 11            | 6             | 1.237998                | 1.105192  | -0.409054 |
| 12            | 6             | 0.484417                | 2.176353  | 0.384385  |
| 13            | 1             | -1.281156               | 2.396187  | -0.929989 |
| 14            | 6             | 0.972427                | 3.490984  | -0.180894 |
| 15            | 1             | 0.548280                | 2.080264  | 1.474289  |
| 16            | 6             | 1.955904                | 1.816177  | -1.555684 |
| 17            | 6             | 1.766356                | 3.288146  | -1.247115 |
| 18            | 1             | 3.017585                | 1.542695  | -1.599576 |
| 19            | 1             | 1.539700                | 1.560586  | -2.538035 |
| 20            | 6             | 2.423228                | 4.323502  | -2.120756 |
| 21            | 6             | 0.523562                | 4.792954  | 0.430152  |
| 22            | 1             | 0.939019                | 5.662022  | -0.088844 |
| 23            | 1             | 0.825823                | 4.853660  | 1.485337  |
| 24            | 1             | -0.572493               | 4.883544  | 0.410148  |
| 25            | 1             | 2.199905                | 5.346666  | -1.803473 |
| 26            | 1             | 2.096209                | 4.212221  | -3.163928 |
| 27            | 1             | 3.515064                | 4.197391  | -2.117232 |
| 28            | 6             | 2.281250                | -3.359300 | 0.391808  |
| 29            | 6             | 0.377361                | -2.145933 | 2.774547  |
| 30            | 6             | -2.524035               | -2.050332 | 1.714411  |
| 31            | 6             | -2.512214               | -3.035126 | -1.410207 |
| 32            | 6             | 0.461473                | -3.789808 | -2.127414 |
| 33            | 1             | 2.356701                | -4.435237 | 0.184845  |
| 34            | 1             | 2.692300                | -3.192313 | 1.391131  |
| 35            | 1             | 2.925471                | -2.841088 | -0.326636 |

|    |   |           |           |           |
|----|---|-----------|-----------|-----------|
| 36 | 1 | -0.185971 | -2.820451 | 3.434412  |
| 37 | 1 | 0.147696  | -1.120391 | 3.088441  |
| 38 | 1 | 1.439935  | -2.320990 | 2.961682  |
| 39 | 1 | -2.589591 | -2.787287 | 2.526907  |
| 40 | 1 | -3.464758 | -2.096714 | 1.158761  |
| 41 | 1 | -2.450212 | -1.059110 | 2.174881  |
| 42 | 1 | -2.613058 | -4.104459 | -1.640975 |
| 43 | 1 | -2.396568 | -2.501511 | -2.360646 |
| 44 | 1 | -3.451160 | -2.712395 | -0.950013 |
| 45 | 1 | 0.344798  | -4.881726 | -2.055931 |
| 46 | 1 | 1.514039  | -3.581899 | -2.344730 |
| 47 | 1 | -0.126613 | -3.438913 | -2.979156 |
| 48 | 6 | -2.848470 | 0.537103  | -0.390820 |
| 49 | 6 | 2.746443  | -0.068498 | 1.220820  |
| 50 | 1 | -3.115891 | -0.517336 | -0.433115 |
| 51 | 1 | -2.847887 | 0.912046  | -1.425168 |
| 52 | 1 | 2.523024  | 0.685785  | 1.994480  |
| 53 | 1 | 2.738543  | -1.041468 | 1.713679  |
| 54 | 6 | 4.147849  | 0.201194  | 0.646722  |
| 55 | 1 | 4.227519  | 1.215662  | 0.243937  |
| 56 | 1 | 4.900857  | 0.093684  | 1.437178  |
| 57 | 1 | 4.384922  | -0.507481 | -0.154469 |
| 58 | 6 | -3.873484 | 1.307482  | 0.452753  |
| 59 | 1 | -4.878906 | 1.187311  | 0.032741  |
| 60 | 1 | -3.884874 | 0.943578  | 1.485832  |
| 61 | 1 | -3.638902 | 2.378746  | 0.472570  |

**1<sup>Ar</sup>** (E = -1100.9929376 a.u.)

| Center Number | Atomic Number | Coordinates (Angstroms) |           |           |
|---------------|---------------|-------------------------|-----------|-----------|
|               |               | X                       | Y         | Z         |
| 1             | 22            | -1.146858               | 0.059444  | 0.327832  |
| 2             | 7             | 2.127186                | -0.141148 | 0.121180  |
| 3             | 6             | -3.039068               | 0.118836  | -1.198779 |
| 4             | 6             | -2.119152               | -0.780622 | -1.804984 |
| 5             | 6             | -2.427340               | 1.412692  | -1.178401 |
| 6             | 17            | -0.795638               | 2.233484  | 1.394963  |
| 7             | 6             | -0.932783               | -0.061230 | -2.116590 |
| 8             | 6             | -1.131839               | 1.303591  | -1.748908 |
| 9             | 6             | 0.958379                | -0.095179 | 0.174563  |
| 10            | 6             | -0.966734               | -2.191028 | 0.631006  |
| 11            | 6             | -2.059520               | -1.722167 | 1.438050  |
| 12            | 1             | -0.028553               | -2.463676 | 1.105032  |
| 13            | 6             | -0.389755               | -0.506734 | 2.700498  |
| 14            | 6             | -1.724091               | -0.831639 | 2.502983  |
| 15            | 1             | -0.128129               | 0.312864  | 3.354904  |
| 16            | 1             | 0.404773                | -1.193369 | 2.453422  |
| 17            | 6             | -2.802938               | -0.155000 | 3.330208  |
| 18            | 6             | -3.442679               | -2.340166 | 1.357318  |
| 19            | 1             | -4.251961               | -1.625613 | 1.531956  |
| 20            | 1             | -3.529480               | -3.127572 | 2.122180  |
| 21            | 1             | -3.608104               | -2.817380 | 0.388781  |
| 22            | 1             | -3.193108               | -0.857511 | 4.080470  |
| 23            | 1             | -3.650886               | 0.183693  | 2.725104  |
| 24            | 1             | -2.393241               | 0.710463  | 3.857285  |
| 25            | 6             | -2.425621               | -2.170911 | -2.299089 |
| 26            | 6             | -4.506711               | -0.123349 | -0.938866 |
| 27            | 6             | -3.144320               | 2.688707  | -0.817255 |
| 28            | 6             | -0.186927               | 2.445167  | -2.018744 |
| 29            | 6             | 0.234248                | -0.614735 | -2.896606 |
| 30            | 1             | -2.841477               | -2.114354 | -3.315949 |
| 31            | 1             | -3.161330               | -2.687610 | -1.677364 |
| 32            | 1             | -1.529195               | -2.796517 | -2.349841 |
| 33            | 1             | -5.107930               | 0.321604  | -1.745371 |
| 34            | 1             | -4.843401               | 0.330393  | -0.000058 |
| 35            | 1             | -4.746800               | -1.188172 | -0.900920 |

|    |   |           |           |           |
|----|---|-----------|-----------|-----------|
| 36 | 1 | -3.799320 | 2.994355  | -1.646995 |
| 37 | 1 | -2.443365 | 3.500738  | -0.615859 |
| 38 | 1 | -3.770760 | 2.570064  | 0.072851  |
| 39 | 1 | -0.445123 | 2.943530  | -2.964293 |
| 40 | 1 | 0.849514  | 2.102038  | -2.100378 |
| 41 | 1 | -0.229276 | 3.188564  | -1.218000 |
| 42 | 1 | -0.001351 | -0.637273 | -3.970396 |
| 43 | 1 | 0.478505  | -1.637968 | -2.592501 |
| 44 | 1 | 1.133392  | -0.004938 | -2.771451 |
| 45 | 1 | -1.226222 | -2.865493 | -0.175771 |
| 46 | 6 | 3.517762  | -0.157986 | 0.087839  |
| 47 | 6 | 4.216219  | 1.032169  | 0.401528  |
| 48 | 6 | 4.174449  | -1.363560 | -0.253496 |
| 49 | 6 | 5.616074  | 0.987063  | 0.362328  |
| 50 | 6 | 5.575025  | -1.351569 | -0.281389 |
| 51 | 6 | 6.291055  | -0.189736 | 0.023257  |
| 52 | 1 | 6.176136  | 1.885325  | 0.600514  |
| 53 | 1 | 6.102942  | -2.263175 | -0.541509 |
| 54 | 1 | 7.375659  | -0.201862 | -0.001951 |
| 55 | 6 | 3.475853  | 2.295041  | 0.765780  |
| 56 | 1 | 2.823357  | 2.630732  | -0.049700 |
| 57 | 1 | 2.829396  | 2.149303  | 1.639094  |
| 58 | 1 | 4.178462  | 3.101216  | 0.991909  |
| 59 | 6 | 3.390208  | -2.612662 | -0.571611 |
| 60 | 1 | 2.751744  | -2.911809 | 0.269213  |
| 61 | 1 | 2.729430  | -2.466037 | -1.435070 |
| 62 | 1 | 4.063366  | -3.443459 | -0.798115 |

TS1<sup>Ar</sup>-2<sup>Ar</sup> (E = -1100.9869907 a.u.)

| Center Number | Atomic Number | Coordinates (Angstroms) |           |           |
|---------------|---------------|-------------------------|-----------|-----------|
|               |               | X                       | Y         | Z         |
| 1             | 22            | -1.120175               | -0.549627 | -0.685044 |
| 2             | 7             | -3.157813               | 1.404796  | -2.264645 |
| 3             | 6             | 1.269382                | -1.027620 | -0.868668 |
| 4             | 6             | 1.080271                | -0.332165 | 0.352527  |
| 5             | 6             | 0.897179                | -0.157823 | -1.935850 |
| 6             | 17            | -1.430742               | -2.203204 | -2.431450 |
| 7             | 6             | 0.582523                | 0.975466  | 0.044890  |
| 8             | 6             | 0.476999                | 1.081172  | -1.370938 |
| 9             | 6             | -2.511474               | 0.627832  | -1.616282 |
| 10            | 6             | -1.880643               | 0.011683  | 1.357705  |
| 11            | 6             | -2.106227               | -1.404391 | 1.288654  |
| 12            | 1             | -2.720797               | 0.687351  | 1.214225  |
| 13            | 6             | -3.566233               | -0.834425 | -0.565498 |
| 14            | 6             | -2.920054               | -1.848755 | 0.241343  |
| 15            | 1             | -4.116281               | -1.210349 | -1.420919 |
| 16            | 1             | -4.085029               | -0.045009 | -0.026437 |
| 17            | 6             | -3.241416               | -3.310895 | 0.019195  |
| 18            | 6             | -1.506825               | -2.368626 | 2.295326  |
| 19            | 1             | -1.023630               | -3.232555 | 1.826375  |
| 20            | 1             | -2.301589               | -2.755209 | 2.949175  |
| 21            | 1             | -0.775034               | -1.866775 | 2.931552  |
| 22            | 1             | -4.056793               | -3.613711 | 0.693512  |
| 23            | 1             | -2.386206               | -3.965210 | 0.212448  |
| 24            | 1             | -3.567834               | -3.482723 | -1.008621 |
| 25            | 6             | 1.543225                | -0.798073 | 1.709775  |
| 26            | 6             | 1.846735                | -2.410882 | -1.030605 |
| 27            | 6             | 1.101133                | -0.417255 | -3.404853 |
| 28            | 6             | 0.185157                | 2.346435  | -2.139194 |
| 29            | 6             | 0.457837                | 2.139388  | 0.996771  |
| 30            | 1             | 2.588956                | -0.498650 | 1.870584  |
| 31            | 1             | 1.496694                | -1.886433 | 1.809866  |
| 32            | 1             | 0.954717                | -0.360066 | 2.521393  |
| 33            | 1             | 2.920949                | -2.354493 | -1.257854 |
| 34            | 1             | 1.357855                | -2.951451 | -1.846315 |

|    |   |           |           |           |
|----|---|-----------|-----------|-----------|
| 35 | 1 | 1.734594  | -3.006868 | -0.119178 |
| 36 | 1 | 2.075793  | -0.018418 | -3.723042 |
| 37 | 1 | 0.328932  | 0.062644  | -4.013973 |
| 38 | 1 | 1.078735  | -1.485173 | -3.631131 |
| 39 | 1 | 1.118155  | 2.898072  | -2.325265 |
| 40 | 1 | -0.488209 | 3.010364  | -1.589119 |
| 41 | 1 | -0.276381 | 2.137524  | -3.108355 |
| 42 | 1 | 1.315011  | 2.817459  | 0.876140  |
| 43 | 1 | 0.443513  | 1.814948  | 2.040654  |
| 44 | 1 | -0.451379 | 2.723206  | 0.816878  |
| 45 | 1 | -1.206560 | 0.352343  | 2.133206  |
| 46 | 6 | -4.478014 | 1.763095  | -2.608367 |
| 47 | 6 | -5.046444 | 1.201129  | -3.774291 |
| 48 | 6 | -5.161638 | 2.712240  | -1.815995 |
| 49 | 6 | -6.351871 | 1.585852  | -4.112414 |
| 50 | 6 | -6.463430 | 3.066435  | -2.199953 |
| 51 | 6 | -7.059380 | 2.507255  | -3.334060 |
| 52 | 1 | -6.809588 | 1.158888  | -4.999401 |
| 53 | 1 | -7.007070 | 3.790656  | -1.601105 |
| 54 | 1 | -8.067384 | 2.794224  | -3.614825 |
| 55 | 6 | -4.265041 | 0.228571  | -4.625625 |
| 56 | 1 | -3.342212 | 0.685585  | -5.005697 |
| 57 | 1 | -3.961134 | -0.662331 | -4.063509 |
| 58 | 1 | -4.860118 | -0.097648 | -5.483016 |
| 59 | 6 | -4.509406 | 3.325027  | -0.599322 |
| 60 | 1 | -4.310577 | 2.576477  | 0.179112  |
| 61 | 1 | -3.546225 | 3.786693  | -0.850234 |
| 62 | 1 | -5.152077 | 4.094719  | -0.163221 |

$2^{Ar}$  (E = -1101.0025418 a.u.)

| Center Number | Atomic Number | Coordinates (Angstroms) |           |           |
|---------------|---------------|-------------------------|-----------|-----------|
|               |               | X                       | Y         | Z         |
| 1             | 22            | 1.306857                | 0.271352  | 0.003049  |
| 2             | 7             | -1.631422               | -0.661490 | 0.190855  |
| 3             | 6             | 2.750858                | -1.212570 | 1.231088  |
| 4             | 6             | 3.349912                | -0.927921 | -0.033093 |
| 5             | 6             | 1.531655                | -1.896982 | 0.992341  |
| 6             | 17            | 1.414044                | 1.591707  | 1.926572  |
| 7             | 6             | 2.525083                | -1.485148 | -1.052265 |
| 8             | 6             | 1.390106                | -2.070969 | -0.419832 |
| 9             | 6             | -0.788358               | 0.056311  | -0.434863 |
| 10            | 6             | 1.697908                | 1.222519  | -1.863049 |
| 11            | 6             | 1.070659                | 2.422188  | -1.311115 |
| 12            | 1             | 1.099893                | 0.638034  | -2.564271 |
| 13            | 6             | -1.148527               | 1.240609  | -1.341193 |
| 14            | 6             | -0.261171               | 2.423567  | -0.996312 |
| 15            | 1             | -2.204153               | 1.505408  | -1.234922 |
| 16            | 1             | -0.988486               | 0.933517  | -2.383091 |
| 17            | 6             | -0.955823               | 3.567599  | -0.301035 |
| 18            | 6             | 1.972500                | 3.605941  | -0.984467 |
| 19            | 1             | 1.890980                | 3.916019  | 0.061445  |
| 20            | 1             | 1.715545                | 4.467023  | -1.614981 |
| 21            | 1             | 3.020216                | 3.355482  | -1.178085 |
| 22            | 1             | -1.711737               | 4.012281  | -0.965210 |
| 23            | 1             | -0.271232               | 4.357505  | 0.011973  |
| 24            | 1             | -1.489679               | 3.208815  | 0.589123  |
| 25            | 6             | 4.678432                | -0.241689 | -0.230959 |
| 26            | 6             | 3.377023                | -0.947213 | 2.574311  |
| 27            | 6             | 0.595885                | -2.444984 | 2.038501  |
| 28            | 6             | 0.365426                | -2.948279 | -1.088936 |
| 29            | 6             | 2.875617                | -1.617903 | -2.511816 |
| 30            | 1             | 5.503689                | -0.950655 | -0.074594 |
| 31            | 1             | 4.819468                | 0.582640  | 0.476519  |
| 32            | 1             | 4.780124                | 0.161841  | -1.242717 |
| 33            | 1             | 4.019024                | -1.794320 | 2.855887  |

|    |   |           |           |           |
|----|---|-----------|-----------|-----------|
| 34 | 1 | 2.624246  | -0.819226 | 3.355716  |
| 35 | 1 | 3.995337  | -0.045442 | 2.565095  |
| 36 | 1 | 0.800760  | -3.511161 | 2.212769  |
| 37 | 1 | -0.445573 | -2.340997 | 1.722502  |
| 38 | 1 | 0.713607  | -1.924038 | 2.993370  |
| 39 | 1 | 0.721955  | -3.988503 | -1.107789 |
| 40 | 1 | 0.178684  | -2.644773 | -2.123696 |
| 41 | 1 | -0.585038 | -2.923501 | -0.552596 |
| 42 | 1 | 3.383304  | -2.576508 | -2.688812 |
| 43 | 1 | 3.548215  | -0.823957 | -2.848656 |
| 44 | 1 | 1.986911  | -1.596616 | -3.150752 |
| 45 | 1 | 2.718901  | 1.342301  | -2.213541 |
| 46 | 6 | -3.048550 | -0.475649 | 0.134483  |
| 47 | 6 | -3.680383 | 0.080719  | 1.274676  |
| 48 | 6 | -3.813766 | -0.940939 | -0.962461 |
| 49 | 6 | -5.077769 | 0.197882  | 1.282692  |
| 50 | 6 | -5.211680 | -0.812121 | -0.906765 |
| 51 | 6 | -5.845341 | -0.242608 | 0.200430  |
| 52 | 1 | -5.563105 | 0.631468  | 2.152550  |
| 53 | 1 | -5.803154 | -1.169370 | -1.745244 |
| 54 | 1 | -6.926627 | -0.151636 | 0.223825  |
| 55 | 6 | -2.857537 | 0.537839  | 2.456965  |
| 56 | 1 | -2.196649 | -0.262853 | 2.810649  |
| 57 | 1 | -2.204773 | 1.382934  | 2.203908  |
| 58 | 1 | -3.503763 | 0.847314  | 3.283923  |
| 59 | 6 | -3.162175 | -1.582967 | -2.167805 |
| 60 | 1 | -2.539447 | -0.875178 | -2.729774 |
| 61 | 1 | -2.514123 | -2.417888 | -1.878618 |
| 62 | 1 | -3.922871 | -1.967671 | -2.853817 |

TS2<sup>Ar</sup>-3<sup>Ar</sup> (E = -1101.0022749 a.u.)

| Center Number | Atomic Number | Coordinates (Angstroms) |           |           |
|---------------|---------------|-------------------------|-----------|-----------|
|               |               | X                       | Y         | Z         |
| 1             | 7             | -1.484197               | -0.674642 | 0.319441  |
| 2             | 6             | 2.967675                | -1.169581 | 0.807790  |
| 3             | 6             | 3.380520                | -0.776827 | -0.500912 |
| 4             | 6             | 1.766471                | -1.916235 | 0.680830  |
| 5             | 17            | 1.534118                | 1.540116  | 1.841526  |
| 6             | 6             | 2.454731                | -1.311854 | -1.438734 |
| 7             | 6             | 1.446787                | -2.009516 | -0.709837 |
| 8             | 6             | -0.799730               | 0.007003  | -0.510600 |
| 9             | 6             | 1.488222                | 1.493609  | -1.798669 |
| 10            | 6             | 0.639169                | 2.575210  | -1.262754 |
| 11            | 1             | 1.046456                | 0.914757  | -2.611042 |
| 12            | 6             | -1.346131               | 1.064481  | -1.468934 |
| 13            | 6             | -0.702469               | 2.392469  | -1.100195 |
| 14            | 1             | -2.434985               | 1.134795  | -1.405513 |
| 15            | 1             | -1.088407               | 0.776304  | -2.495857 |
| 16            | 6             | -1.655791               | 3.414924  | -0.528406 |
| 17            | 6             | 1.363659                | 3.855445  | -0.881777 |
| 18            | 1             | 0.827901                | 4.457525  | -0.145733 |
| 19            | 1             | 1.526835                | 4.472979  | -1.776287 |
| 20            | 1             | 2.347385                | 3.623317  | -0.459611 |
| 21            | 1             | -2.398596               | 3.705550  | -1.285913 |
| 22            | 1             | -1.160821               | 4.322681  | -0.179874 |
| 23            | 1             | -2.219150               | 2.989155  | 0.312984  |
| 24            | 6             | 4.636852                | -0.005296 | -0.817508 |
| 25            | 6             | 3.747077                | -0.935211 | 2.075167  |
| 26            | 6             | 1.007502                | -2.585680 | 1.798196  |
| 27            | 6             | 0.395843                | -2.912909 | -1.297460 |
| 28            | 6             | 2.597984                | -1.299676 | -2.938523 |
| 29            | 1             | 5.513403                | -0.666369 | -0.766343 |
| 30            | 1             | 4.804060                | 0.811261  | -0.106601 |
| 31            | 1             | 4.607514                | 0.424139  | -1.822865 |
| 32            | 1             | 4.482638                | -1.740713 | 2.212819  |



|    |    |           |           |           |
|----|----|-----------|-----------|-----------|
| 33 | 1  | 3.098258  | -0.917397 | 2.954167  |
| 34 | 1  | 4.289735  | 0.013895  | 2.049666  |
| 35 | 1  | 1.286725  | -3.646853 | 1.866540  |
| 36 | 1  | -0.071368 | -2.524461 | 1.631109  |
| 37 | 1  | 1.225017  | -2.122443 | 2.765157  |
| 38 | 1  | 0.807101  | -3.923368 | -1.435910 |
| 39 | 1  | 0.048109  | -2.559684 | -2.272883 |
| 40 | 1  | -0.471287 | -2.987975 | -0.638375 |
| 41 | 1  | 3.162809  | -2.182797 | -3.268643 |
| 42 | 1  | 3.133775  | -0.415189 | -3.295099 |
| 43 | 1  | 1.625911  | -1.328011 | -3.441384 |
| 44 | 1  | 2.500189  | 1.804427  | -2.055065 |
| 45 | 6  | -2.905211 | -0.584641 | 0.473612  |
| 46 | 6  | -3.392539 | 0.013599  | 1.662505  |
| 47 | 6  | -3.796016 | -1.171828 | -0.458395 |
| 48 | 6  | -4.777176 | 0.051230  | 1.882029  |
| 49 | 6  | -5.174756 | -1.117381 | -0.192799 |
| 50 | 6  | -5.669428 | -0.506704 | 0.961999  |
| 51 | 1  | -5.152088 | 0.516514  | 2.789275  |
| 52 | 1  | -5.861713 | -1.566492 | -0.904729 |
| 53 | 1  | -6.738257 | -0.474893 | 1.147974  |
| 54 | 6  | -2.433952 | 0.598480  | 2.673834  |
| 55 | 1  | -1.667975 | -0.132030 | 2.960552  |
| 56 | 1  | -1.892928 | 1.466947  | 2.277846  |
| 57 | 1  | -2.967386 | 0.916537  | 3.574789  |
| 58 | 6  | -3.299055 | -1.870291 | -1.705456 |
| 59 | 1  | -2.769718 | -1.189689 | -2.383661 |
| 60 | 1  | -2.603734 | -2.681617 | -1.462059 |
| 61 | 1  | -4.137750 | -2.301923 | -2.259981 |
| 62 | 22 | 1.274763  | 0.273412  | -0.078448 |

$3^{\text{Ar}}$  (E = -1101.0159543 a.u.)

| Center Number | Atomic Number | Coordinates (Angstroms) |           |           |
|---------------|---------------|-------------------------|-----------|-----------|
|               |               | X                       | Y         | Z         |
| 1             | 22            | 0.976439                | 0.039395  | 0.244186  |
| 2             | 7             | -1.135236               | -0.138742 | -0.060089 |
| 3             | 6             | 3.074883                | -1.144363 | 0.341822  |
| 4             | 6             | 2.926636                | -0.651461 | -0.982957 |
| 5             | 6             | 2.031612                | -2.086660 | 0.580585  |
| 6             | 17            | 1.181918                | 0.625908  | 2.493031  |
| 7             | 6             | 1.778672                | -1.277840 | -1.563842 |
| 8             | 6             | 1.241624                | -2.180762 | -0.598563 |
| 9             | 6             | -0.583991               | 0.683043  | -0.856409 |
| 10            | 6             | 1.627029                | 1.996354  | -0.498409 |
| 11            | 6             | 0.619704                | 3.061694  | -0.193937 |
| 12            | 1             | 1.767603                | 1.879970  | -1.575472 |
| 13            | 6             | -1.051482               | 1.872268  | -1.619937 |
| 14            | 6             | -0.616678               | 3.059156  | -0.748790 |
| 15            | 1             | -0.569784               | 1.893170  | -2.605425 |
| 16            | 1             | -2.134999               | 1.892488  | -1.770597 |
| 17            | 6             | -1.693438               | 4.106596  | -0.561254 |
| 18            | 6             | 1.095673                | 4.122077  | 0.781453  |
| 19            | 1             | 0.309502                | 4.804615  | 1.112789  |
| 20            | 1             | 1.903008                | 4.719835  | 0.335514  |
| 21            | 1             | 1.511755                | 3.631177  | 1.670515  |
| 22            | 1             | -1.368792               | 4.941847  | 0.062786  |
| 23            | 1             | -2.593042               | 3.671709  | -0.100679 |
| 24            | 1             | -2.004839               | 4.521216  | -1.531533 |
| 25            | 6             | 3.926471                | 0.202750  | -1.717868 |
| 26            | 6             | 4.193121                | -0.801484 | 1.292634  |
| 27            | 6             | 1.845150                | -2.903581 | 1.834239  |
| 28            | 6             | 0.108872                | -3.155891 | -0.803540 |
| 29            | 6             | 1.380146                | -1.161559 | -3.015209 |
| 30            | 1             | 4.729971                | -0.428200 | -2.123885 |
| 31            | 1             | 4.391318                | 0.947833  | -1.064901 |

|    |   |           |           |           |
|----|---|-----------|-----------|-----------|
| 32 | 1 | 3.471437  | 0.735615  | -2.557728 |
| 33 | 1 | 5.033212  | -1.499016 | 1.163280  |
| 34 | 1 | 3.866381  | -0.857031 | 2.334557  |
| 35 | 1 | 4.574102  | 0.210028  | 1.120118  |
| 36 | 1 | 2.431836  | -3.831828 | 1.776857  |
| 37 | 1 | 0.797676  | -3.186267 | 1.981440  |
| 38 | 1 | 2.170185  | -2.355795 | 2.723152  |
| 39 | 1 | 0.506769  | -4.163675 | -0.987667 |
| 40 | 1 | -0.510604 | -2.886918 | -1.662498 |
| 41 | 1 | -0.546754 | -3.215738 | 0.071237  |
| 42 | 1 | 2.058796  | -1.751437 | -3.647647 |
| 43 | 1 | 1.420985  | -0.126065 | -3.369883 |
| 44 | 1 | 0.367038  | -1.533668 | -3.191158 |
| 45 | 1 | 2.594284  | 2.226546  | -0.043112 |
| 46 | 6 | -2.519999 | -0.478662 | 0.116603  |
| 47 | 6 | -3.060611 | -0.486440 | 1.426806  |
| 48 | 6 | -3.310136 | -0.856430 | -1.000325 |
| 49 | 6 | -4.403859 | -0.850709 | 1.595139  |
| 50 | 6 | -4.646194 | -1.229859 | -0.775126 |
| 51 | 6 | -5.196427 | -1.221804 | 0.506305  |
| 52 | 1 | -4.824699 | -0.844227 | 2.595827  |
| 53 | 1 | -5.253019 | -1.531370 | -1.623731 |
| 54 | 1 | -6.231800 | -1.509497 | 0.657388  |
| 55 | 6 | -2.782304 | -0.893637 | -2.418396 |
| 56 | 1 | -2.913323 | 0.068886  | -2.929646 |
| 57 | 1 | -1.717711 | -1.135191 | -2.458775 |
| 58 | 1 | -3.322161 | -1.644916 | -3.003108 |
| 59 | 6 | -2.234693 | -0.092404 | 2.625964  |
| 60 | 1 | -1.357772 | -0.736269 | 2.747648  |
| 61 | 1 | -1.848334 | 0.928609  | 2.540755  |
| 62 | 1 | -2.834535 | -0.154748 | 3.538678  |

TS3<sup>Ar</sup>-4<sup>Ar</sup> (E = -1101.0107422 a.u.)

| Center Number | Atomic Number | Coordinates (Angstroms) |           |           |
|---------------|---------------|-------------------------|-----------|-----------|
|               |               | X                       | Y         | Z         |
| 1             | 22            | 0.232519                | -0.396319 | -0.245994 |
| 2             | 7             | -0.836092               | 1.347960  | -0.712791 |
| 3             | 6             | 2.469334                | -1.419185 | 0.118059  |
| 4             | 6             | 1.990959                | -0.911923 | 1.353660  |
| 5             | 6             | 2.642417                | -0.319300 | -0.776445 |
| 6             | 17            | -0.024959               | -1.742034 | -2.121314 |
| 7             | 6             | 1.823716                | 0.500437  | 1.212336  |
| 8             | 6             | 2.254924                | 0.867389  | -0.101049 |
| 9             | 6             | -1.573218               | 0.469790  | -0.174648 |
| 10            | 6             | -0.936275               | -1.593783 | 1.191846  |
| 11            | 6             | -2.287063               | -2.056437 | 0.713047  |
| 12            | 1             | -1.024164               | -0.940735 | 2.070687  |
| 13            | 6             | -2.992191               | 0.274894  | 0.195796  |
| 14            | 6             | -3.267252               | -1.219559 | 0.305645  |
| 15            | 1             | -3.164936               | 0.791787  | 1.152496  |
| 16            | 1             | -3.666432               | 0.755030  | -0.527009 |
| 17            | 6             | -4.674403               | -1.606245 | -0.096989 |
| 18            | 6             | -2.443168               | -3.568041 | 0.720012  |
| 19            | 1             | -3.361025               | -3.921072 | 0.244280  |
| 20            | 1             | -2.417820               | -3.958252 | 1.747347  |
| 21            | 1             | -1.596532               | -4.019631 | 0.185426  |
| 22            | 1             | -4.873678               | -2.675093 | 0.001023  |
| 23            | 1             | -4.876809               | -1.319927 | -1.140538 |
| 24            | 1             | -5.414384               | -1.076906 | 0.522595  |
| 25            | 6             | 1.880367                | -1.669403 | 2.651233  |
| 26            | 6             | 2.817551                | -2.851898 | -0.193662 |
| 27            | 6             | 3.227203                | -0.415703 | -2.162154 |
| 28            | 6             | 2.418617                | 2.276341  | -0.615715 |
| 29            | 6             | 1.481530                | 1.446846  | 2.339348  |
| 30            | 1             | 2.802678                | -1.542671 | 3.236112  |

|    |   |           |           |           |
|----|---|-----------|-----------|-----------|
| 31 | 1 | 1.739609  | -2.742384 | 2.490619  |
| 32 | 1 | 1.048987  | -1.314318 | 3.268352  |
| 33 | 1 | 3.902124  | -3.015665 | -0.118399 |
| 34 | 1 | 2.508718  | -3.123531 | -1.208396 |
| 35 | 1 | 2.330216  | -3.546021 | 0.498148  |
| 36 | 1 | 4.321272  | -0.511665 | -2.110987 |
| 37 | 1 | 3.003239  | 0.472591  | -2.760990 |
| 38 | 1 | 2.839579  | -1.286531 | -2.700006 |
| 39 | 1 | 3.416772  | 2.659710  | -0.360448 |
| 40 | 1 | 1.682475  | 2.960296  | -0.184089 |
| 41 | 1 | 2.316749  | 2.329357  | -1.703767 |
| 42 | 1 | 2.347565  | 1.580879  | 3.003593  |
| 43 | 1 | 0.656192  | 1.073492  | 2.956957  |
| 44 | 1 | 1.202724  | 2.436443  | 1.965977  |
| 45 | 1 | -0.337901 | -2.456614 | 1.491159  |
| 46 | 6 | -1.102946 | 2.671030  | -1.206287 |
| 47 | 6 | -0.864370 | 2.922708  | -2.578431 |
| 48 | 6 | -1.550811 | 3.688915  | -0.332760 |
| 49 | 6 | -1.095087 | 4.217187  | -3.064861 |
| 50 | 6 | -1.751625 | 4.974108  | -0.865231 |
| 51 | 6 | -1.531716 | 5.239730  | -2.217491 |
| 52 | 1 | -0.927100 | 4.418956  | -4.118218 |
| 53 | 1 | -2.084258 | 5.767886  | -0.203203 |
| 54 | 1 | -1.695708 | 6.238250  | -2.609299 |
| 55 | 6 | -1.810946 | 3.445114  | 1.137589  |
| 56 | 1 | -2.818389 | 3.043487  | 1.308301  |
| 57 | 1 | -1.101040 | 2.735837  | 1.572673  |
| 58 | 1 | -1.738564 | 4.382257  | 1.697719  |
| 59 | 6 | -0.404611 | 1.825094  | -3.509227 |
| 60 | 1 | 0.534915  | 1.372513  | -3.174032 |
| 61 | 1 | -1.132463 | 1.007878  | -3.567364 |
| 62 | 1 | -0.253500 | 2.217882  | -4.518745 |

$4^{\text{Ar}}$  (E = -1101.0132089 a.u.)

| Center Number | Atomic Number | Coordinates (Angstroms) |           |           |
|---------------|---------------|-------------------------|-----------|-----------|
|               |               | X                       | Y         | Z         |
| 1             | 22            | -0.853512               | -0.156322 | -0.245908 |
| 2             | 7             | 1.175928                | 0.118361  | -0.251371 |
| 3             | 6             | -2.835634               | -1.548305 | 0.233592  |
| 4             | 6             | -2.262499               | -1.164969 | 1.475406  |
| 5             | 6             | -1.895633               | -2.377687 | -0.451315 |
| 6             | 17            | -1.661378               | 0.188996  | -2.429845 |
| 7             | 6             | -0.944375               | -1.710889 | 1.534754  |
| 8             | 6             | -0.727550               | -2.475927 | 0.348720  |
| 9             | 6             | 0.556408                | 1.180159  | -0.584007 |
| 10            | 6             | -1.452159               | 1.672823  | 0.820584  |
| 11            | 6             | -1.256307               | 3.081556  | 0.287961  |
| 12            | 1             | -0.945693               | 1.574077  | 1.793133  |
| 13            | 6             | 0.915492                | 2.574390  | -0.867791 |
| 14            | 6             | -0.192555               | 3.516039  | -0.417287 |
| 15            | 1             | 1.889497                | 2.849262  | -0.436839 |
| 16            | 1             | 1.036078                | 2.666705  | -1.958107 |
| 17            | 6             | 0.061981                | 4.938062  | -0.876404 |
| 18            | 6             | -2.412006               | 3.998011  | 0.665128  |
| 19            | 1             | -2.309399               | 5.023096  | 0.302782  |
| 20            | 1             | -2.532867               | 4.032719  | 1.756939  |
| 21            | 1             | -3.348386               | 3.592925  | 0.256697  |
| 22            | 1             | -0.672458               | 5.656192  | -0.509054 |
| 23            | 1             | 0.067718                | 4.994248  | -1.975497 |
| 24            | 1             | 1.052572                | 5.278149  | -0.539485 |
| 25            | 6             | -2.974337               | -0.486411 | 2.617031  |
| 26            | 6             | -4.225573               | -1.230514 | -0.256575 |
| 27            | 6             | -2.163753               | -3.101310 | -1.745245 |
| 28            | 6             | 0.467708                | -3.360263 | 0.088199  |
| 29            | 6             | -0.043213               | -1.700238 | 2.746117  |

|    |   |           |           |           |
|----|---|-----------|-----------|-----------|
| 30 | 1 | -3.355353 | -1.240210 | 3.320529  |
| 31 | 1 | -3.830481 | 0.102709  | 2.274820  |
| 32 | 1 | -2.315564 | 0.183378  | 3.179327  |
| 33 | 1 | -4.900029 | -2.084910 | -0.102504 |
| 34 | 1 | -4.223851 | -0.995525 | -1.326188 |
| 35 | 1 | -4.654667 | -0.372665 | 0.270742  |
| 36 | 1 | -2.769241 | -4.000127 | -1.559724 |
| 37 | 1 | -1.237919 | -3.421202 | -2.233268 |
| 38 | 1 | -2.707709 | -2.467932 | -2.452020 |
| 39 | 1 | 0.359361  | -4.314788 | 0.622925  |
| 40 | 1 | 1.401519  | -2.899845 | 0.425750  |
| 41 | 1 | 0.575285  | -3.594829 | -0.975184 |
| 42 | 1 | -0.273482 | -2.555299 | 3.398543  |
| 43 | 1 | -0.173883 | -0.793212 | 3.345682  |
| 44 | 1 | 1.013411  | -1.776749 | 2.471342  |
| 45 | 1 | -2.515318 | 1.535931  | 1.035141  |
| 46 | 6 | 2.577459  | -0.135896 | -0.049849 |
| 47 | 6 | 3.276137  | -0.840249 | -1.056044 |
| 48 | 6 | 3.213490  | 0.302363  | 1.132929  |
| 49 | 6 | 4.634509  | -1.121560 | -0.843603 |
| 50 | 6 | 4.573146  | -0.007408 | 1.302276  |
| 51 | 6 | 5.279869  | -0.715690 | 0.327732  |
| 52 | 1 | 5.184658  | -1.660546 | -1.608783 |
| 53 | 1 | 5.075015  | 0.316734  | 2.208900  |
| 54 | 1 | 6.329354  | -0.946781 | 0.478132  |
| 55 | 6 | 2.478136  | 1.100044  | 2.187511  |
| 56 | 1 | 2.271666  | 2.124366  | 1.851870  |
| 57 | 1 | 1.515521  | 0.649976  | 2.446507  |
| 58 | 1 | 3.076475  | 1.169130  | 3.100492  |
| 59 | 6 | 2.594911  | -1.248141 | -2.342602 |
| 60 | 1 | 1.689609  | -1.835705 | -2.158208 |
| 61 | 1 | 2.285926  | -0.374190 | -2.929719 |
| 62 | 1 | 3.269920  | -1.845393 | -2.962045 |

TS4<sup>Ar</sup>-5<sup>Ar</sup> (E = -1101.0013163 a.u.)

| Center Number | Atomic Number | Coordinates (Angstroms) |           |           |
|---------------|---------------|-------------------------|-----------|-----------|
|               |               | X                       | Y         | Z         |
| 1             | 22            | 0.651473                | -0.095726 | -0.683199 |
| 2             | 7             | -0.596118               | 1.401148  | -0.475323 |
| 3             | 6             | 2.899307                | -1.017834 | -0.682197 |
| 4             | 6             | 2.541722                | -0.706801 | 0.659291  |
| 5             | 6             | 2.960282                | 0.204646  | -1.422219 |
| 6             | 17            | 0.246712                | -1.349859 | -2.645066 |
| 7             | 6             | 2.351901                | 0.705939  | 0.740722  |
| 8             | 6             | 2.627447                | 1.268447  | -0.544052 |
| 9             | 6             | -1.232313               | 0.239397  | -0.454935 |
| 10            | 6             | -0.718466               | -1.067479 | 0.958209  |
| 11            | 6             | -2.134564               | -1.554741 | 1.149665  |
| 12            | 1             | -0.313672               | -0.639459 | 1.881042  |
| 13            | 6             | -2.683048               | -0.038445 | -0.640203 |
| 14            | 6             | -3.106532               | -1.089631 | 0.351617  |
| 15            | 1             | -3.278440               | 0.877657  | -0.521996 |
| 16            | 1             | -2.842105               | -0.385566 | -1.670805 |
| 17            | 6             | -4.559368               | -1.494769 | 0.330694  |
| 18            | 6             | -2.309024               | -2.593132 | 2.238102  |
| 19            | 1             | -3.348358               | -2.909108 | 2.361949  |
| 20            | 1             | -1.958253               | -2.201332 | 3.202968  |
| 21            | 1             | -1.707012               | -3.486510 | 2.020814  |
| 22            | 1             | -4.801389               | -2.248852 | 1.083300  |
| 23            | 1             | -4.830495               | -1.902443 | -0.653423 |
| 24            | 1             | -5.208422               | -0.624588 | 0.503374  |
| 25            | 6             | 2.528271                | -1.669004 | 1.822091  |
| 26            | 6             | 3.278475                | -2.374565 | -1.219777 |
| 27            | 6             | 3.392760                | 0.318557  | -2.862087 |
| 28            | 6             | 2.704257                | 2.746145  | -0.840838 |

|    |   |           |           |           |
|----|---|-----------|-----------|-----------|
| 29 | 6 | 2.128079  | 1.501145  | 2.004292  |
| 30 | 1 | 3.515342  | -1.698354 | 2.304590  |
| 31 | 1 | 2.289545  | -2.689820 | 1.505822  |
| 32 | 1 | 1.801466  | -1.381075 | 2.588852  |
| 33 | 1 | 4.372018  | -2.485492 | -1.246420 |
| 34 | 1 | 2.900748  | -2.520142 | -2.236372 |
| 35 | 1 | 2.880365  | -3.183794 | -0.599412 |
| 36 | 1 | 4.485659  | 0.233181  | -2.944664 |
| 37 | 1 | 3.103099  | 1.279287  | -3.298922 |
| 38 | 1 | 2.947738  | -0.472333 | -3.474165 |
| 39 | 1 | 3.630711  | 3.169172  | -0.427039 |
| 40 | 1 | 1.866918  | 3.298749  | -0.403058 |
| 41 | 1 | 2.709648  | 2.942934  | -1.916829 |
| 42 | 1 | 3.092321  | 1.791441  | 2.446387  |
| 43 | 1 | 1.586696  | 0.925666  | 2.762368  |
| 44 | 1 | 1.567181  | 2.421079  | 1.812231  |
| 45 | 1 | -0.098257 | -1.943712 | 0.717937  |
| 46 | 6 | -1.091720 | 2.723712  | -0.285301 |
| 47 | 6 | -1.053981 | 3.612168  | -1.389002 |
| 48 | 6 | -1.621110 | 3.134536  | 0.962834  |
| 49 | 6 | -1.525348 | 4.921834  | -1.212095 |
| 50 | 6 | -2.082240 | 4.454952  | 1.091438  |
| 51 | 6 | -2.032260 | 5.347577  | 0.018516  |
| 52 | 1 | -1.501167 | 5.605914  | -2.055112 |
| 53 | 1 | -2.482660 | 4.778139  | 2.047907  |
| 54 | 1 | -2.391770 | 6.364526  | 0.138144  |
| 55 | 6 | -0.558581 | 3.157161  | -2.743417 |
| 56 | 1 | 0.490364  | 2.845412  | -2.714101 |
| 57 | 1 | -1.128933 | 2.295771  | -3.111141 |
| 58 | 1 | -0.652190 | 3.964664  | -3.475736 |
| 59 | 6 | -1.696178 | 2.192811  | 2.143972  |
| 60 | 1 | -2.374152 | 1.350970  | 1.958354  |
| 61 | 1 | -0.717129 | 1.764577  | 2.382761  |
| 62 | 1 | -2.058409 | 2.721828  | 3.030366  |

5<sup>Ar</sup> (E = -1101.0272465 a.u.)

| Center Number | Atomic Number | Coordinates (Angstroms) |           |           |
|---------------|---------------|-------------------------|-----------|-----------|
|               |               | X                       | Y         | Z         |
| 1             | 22            | -0.914597               | -0.073371 | -0.149232 |
| 2             | 7             | 0.988982                | -0.009699 | 0.097060  |
| 3             | 6             | -2.976173               | -1.319243 | -0.042191 |
| 4             | 6             | -2.596208               | -0.928294 | 1.270634  |
| 5             | 6             | -1.987003               | -2.224258 | -0.541383 |
| 6             | 17            | -1.642548               | 0.743731  | -2.227294 |
| 7             | 6             | -1.358524               | -1.576271 | 1.573677  |
| 8             | 6             | -0.994067               | -2.395031 | 0.458706  |
| 9             | 6             | 0.647740                | 1.322389  | -0.014456 |
| 10            | 6             | -0.251800               | 1.980172  | 0.974997  |
| 11            | 6             | -0.336984               | 3.415372  | 0.505355  |
| 12            | 1             | 0.006997                | 1.852191  | 2.032433  |
| 13            | 6             | 1.174549                | 2.356366  | -0.982353 |
| 14            | 6             | 0.456364                | 3.619185  | -0.559655 |
| 15            | 1             | 2.266033                | 2.474466  | -0.905687 |
| 16            | 1             | 0.958740                | 2.099122  | -2.026656 |
| 17            | 6             | 0.671214                | 4.896854  | -1.324463 |
| 18            | 6             | -1.229471               | 4.391639  | 1.223345  |
| 19            | 1             | -1.157312               | 5.399542  | 0.804842  |
| 20            | 1             | -0.972629               | 4.450655  | 2.290373  |
| 21            | 1             | -2.281566               | 4.078829  | 1.162988  |
| 22            | 1             | 0.121987                | 5.739704  | -0.894841 |
| 23            | 1             | 0.349887                | 4.780362  | -2.368476 |
| 24            | 1             | 1.737440                | 5.161757  | -1.345997 |
| 25            | 6             | -3.423458               | -0.101519 | 2.227872  |
| 26            | 6             | -4.256262               | -0.953232 | -0.748543 |
| 27            | 6             | -2.067584               | -2.926062 | -1.873848 |

|    |   |           |           |           |
|----|---|-----------|-----------|-----------|
| 28 | 6 | 0.144773  | -3.383969 | 0.454150  |
| 29 | 6 | -0.657487 | -1.563685 | 2.911154  |
| 30 | 1 | -4.127868 | -0.742183 | 2.777429  |
| 31 | 1 | -4.012082 | 0.660109  | 1.706026  |
| 32 | 1 | -2.800606 | 0.407229  | 2.971294  |
| 33 | 1 | -5.006320 | -1.746592 | -0.617543 |
| 34 | 1 | -4.095946 | -0.814825 | -1.821731 |
| 35 | 1 | -4.684446 | -0.025186 | -0.356955 |
| 36 | 1 | -2.822785 | -3.724130 | -1.842587 |
| 37 | 1 | -1.114477 | -3.386116 | -2.150700 |
| 38 | 1 | -2.349660 | -2.233291 | -2.673690 |
| 39 | 1 | -0.097335 | -4.243330 | 1.095368  |
| 40 | 1 | 1.073961  | -2.943689 | 0.828048  |
| 41 | 1 | 0.341548  | -3.772195 | -0.548953 |
| 42 | 1 | -1.077395 | -2.337560 | 3.570147  |
| 43 | 1 | -0.769432 | -0.603945 | 3.427450  |
| 44 | 1 | 0.412171  | -1.765705 | 2.805226  |
| 45 | 1 | -1.332006 | 1.514904  | 0.959505  |
| 46 | 6 | 2.315434  | -0.515144 | 0.024062  |
| 47 | 6 | 2.744142  | -1.248049 | -1.112130 |
| 48 | 6 | 3.213271  | -0.259080 | 1.093611  |
| 49 | 6 | 4.058609  | -1.742473 | -1.137328 |
| 50 | 6 | 4.516465  | -0.773773 | 1.026137  |
| 51 | 6 | 4.940899  | -1.517515 | -0.077891 |
| 52 | 1 | 4.390798  | -2.299416 | -2.008720 |
| 53 | 1 | 5.199134  | -0.585895 | 1.850054  |
| 54 | 1 | 5.952132  | -1.909852 | -0.116575 |
| 55 | 6 | 1.838532  | -1.472010 | -2.302444 |
| 56 | 1 | 1.019679  | -2.162592 | -2.075439 |
| 57 | 1 | 1.373985  | -0.539153 | -2.639215 |
| 58 | 1 | 2.406564  | -1.892893 | -3.138162 |
| 59 | 6 | 2.781615  | 0.555787  | 2.290957  |
| 60 | 1 | 2.615222  | 1.607881  | 2.023662  |
| 61 | 1 | 1.840800  | 0.184337  | 2.712514  |
| 62 | 1 | 3.544857  | 0.527146  | 3.074409  |

TS5<sup>Ar</sup>-6<sup>Ar</sup> (E = -1101.0217512 a.u.)

| Center Number | Atomic Number | Coordinates (Angstroms) |           |           |
|---------------|---------------|-------------------------|-----------|-----------|
|               |               | X                       | Y         | Z         |
| 1             | 22            | 0.394835                | -0.217814 | -0.352290 |
| 2             | 7             | -0.593488               | 1.316717  | 0.350661  |
| 3             | 6             | 2.057718                | -1.566061 | 0.644124  |
| 4             | 6             | 2.026292                | -0.300814 | 1.306671  |
| 5             | 6             | 2.484819                | -1.338877 | -0.694083 |
| 6             | 17            | -0.136455               | -0.571482 | -2.597296 |
| 7             | 6             | 2.469018                | 0.701222  | 0.386704  |
| 8             | 6             | 2.746421                | 0.056481  | -0.848081 |
| 9             | 6             | -1.661673               | 0.465785  | 0.204280  |
| 10            | 6             | -1.626010               | -0.845870 | 0.746808  |
| 11            | 6             | -2.825149               | -1.569467 | 0.228523  |
| 12            | 1             | -1.280273               | -1.014659 | 1.764154  |
| 13            | 6             | -2.870457               | 0.599980  | -0.699886 |
| 14            | 6             | -3.534158               | -0.755179 | -0.578037 |
| 15            | 1             | -3.535446               | 1.408314  | -0.365797 |
| 16            | 1             | -2.591411               | 0.823996  | -1.735145 |
| 17            | 6             | -4.814607               | -1.048101 | -1.310051 |
| 18            | 6             | -3.098333               | -2.997326 | 0.614205  |
| 19            | 1             | -4.035376               | -3.366023 | 0.187373  |
| 20            | 1             | -3.158353               | -3.107737 | 1.705797  |
| 21            | 1             | -2.288539               | -3.654158 | 0.267365  |
| 22            | 1             | -5.191359               | -2.053542 | -1.099814 |
| 23            | 1             | -4.671526               | -0.962632 | -2.396019 |
| 24            | 1             | -5.597495               | -0.328361 | -1.033002 |
| 25            | 6             | 1.762884                | -0.081998 | 2.777229  |
| 26            | 6             | 1.850676                | -2.912659 | 1.294803  |

|    |   |           |           |           |
|----|---|-----------|-----------|-----------|
| 27 | 6 | 2.727738  | -2.394109 | -1.742255 |
| 28 | 6 | 3.306129  | 0.687668  | -2.098093 |
| 29 | 6 | 2.746946  | 2.139683  | 0.744156  |
| 30 | 1 | 2.686797  | -0.224627 | 3.356371  |
| 31 | 1 | 1.021552  | -0.784713 | 3.172931  |
| 32 | 1 | 1.403526  | 0.931875  | 2.974519  |
| 33 | 1 | 2.800624  | -3.289471 | 1.700474  |
| 34 | 1 | 1.476723  | -3.653552 | 0.581835  |
| 35 | 1 | 1.138846  | -2.859517 | 2.124893  |
| 36 | 1 | 3.780896  | -2.710386 | -1.732708 |
| 37 | 1 | 2.496957  | -2.022342 | -2.744728 |
| 38 | 1 | 2.112439  | -3.282889 | -1.571049 |
| 39 | 1 | 4.367849  | 0.427314  | -2.211823 |
| 40 | 1 | 3.237501  | 1.778809  | -2.070444 |
| 41 | 1 | 2.781265  | 0.340350  | -2.994065 |
| 42 | 1 | 3.688009  | 2.215457  | 1.307140  |
| 43 | 1 | 1.954313  | 2.568247  | 1.364345  |
| 44 | 1 | 2.846500  | 2.769058  | -0.144472 |
| 45 | 1 | -0.420603 | -1.637529 | 0.178868  |
| 46 | 6 | -0.764232 | 2.722217  | 0.523041  |
| 47 | 6 | -0.413411 | 3.638465  | -0.499767 |
| 48 | 6 | -1.299595 | 3.189662  | 1.753179  |
| 49 | 6 | -0.586300 | 5.012198  | -0.260787 |
| 50 | 6 | -1.453431 | 4.570382  | 1.947936  |
| 51 | 6 | -1.096832 | 5.482024  | 0.951166  |
| 52 | 1 | -0.324488 | 5.715473  | -1.046042 |
| 53 | 1 | -1.854804 | 4.926608  | 2.892383  |
| 54 | 1 | -1.221115 | 6.547721  | 1.115095  |
| 55 | 6 | 0.111617  | 3.179068  | -1.840965 |
| 56 | 1 | 1.127410  | 2.775705  | -1.768294 |
| 57 | 1 | -0.504962 | 2.384928  | -2.272332 |
| 58 | 1 | 0.137392  | 4.015802  | -2.546153 |
| 59 | 6 | -1.693617 | 2.224579  | 2.848517  |
| 60 | 1 | -2.565647 | 1.620751  | 2.565185  |
| 61 | 1 | -0.885191 | 1.519524  | 3.071780  |
| 62 | 1 | -1.944077 | 2.764727  | 3.766458  |

6<sup>Ar</sup> (E = -1101.028515 a.u.)

| Center Number | Atomic Number | Coordinates (Angstroms) |           |           |
|---------------|---------------|-------------------------|-----------|-----------|
|               |               | X                       | Y         | Z         |
| 1             | 22            | -0.971182               | 0.380292  | -0.108269 |
| 2             | 7             | 0.860113                | -0.250174 | 0.171430  |
| 3             | 6             | -2.957832               | 0.115387  | 1.153590  |
| 4             | 6             | -2.031731               | -0.898098 | 1.542508  |
| 5             | 6             | -3.303037               | -0.118932 | -0.208347 |
| 6             | 17            | -1.074176               | 1.253370  | -2.254530 |
| 7             | 6             | -1.835524               | -1.778900 | 0.434992  |
| 8             | 6             | -2.621298               | -1.291473 | -0.645660 |
| 9             | 6             | 1.334475                | 1.052162  | 0.174871  |
| 10            | 6             | 0.872744                | 2.035265  | 1.013342  |
| 11            | 6             | 1.398748                | 3.340949  | 0.589780  |
| 12            | 1             | 0.353041                | 1.863880  | 1.945112  |
| 13            | 6             | 2.251645                | 1.695609  | -0.847849 |
| 14            | 6             | 2.223870                | 3.158736  | -0.468586 |
| 15            | 1             | 3.266069                | 1.278488  | -0.807171 |
| 16            | 1             | 1.878649                | 1.535159  | -1.864272 |
| 17            | 6             | 3.040635                | 4.175383  | -1.215397 |
| 18            | 6             | 1.040107                | 4.618207  | 1.301665  |
| 19            | 1             | 1.580222                | 5.478982  | 0.896686  |
| 20            | 1             | 1.267971                | 4.550722  | 2.374118  |
| 21            | 1             | -0.035335               | 4.821317  | 1.211374  |
| 22            | 1             | 2.928646                | 5.179893  | -0.795933 |
| 23            | 1             | 2.745675                | 4.219070  | -2.273076 |
| 24            | 1             | 4.109025                | 3.917927  | -1.192570 |
| 25            | 6             | -1.498205               | -1.094206 | 2.940353  |

|    |   |           |           |           |
|----|---|-----------|-----------|-----------|
| 26 | 6 | -3.611732 | 1.111987  | 2.077873  |
| 27 | 6 | -4.295673 | 0.674977  | -1.016705 |
| 28 | 6 | -2.811400 | -1.939992 | -1.993448 |
| 29 | 6 | -1.091525 | -3.089111 | 0.483428  |
| 30 | 1 | -2.259554 | -1.568462 | 3.576125  |
| 31 | 1 | -1.227350 | -0.143720 | 3.413762  |
| 32 | 1 | -0.615084 | -1.738182 | 2.947788  |
| 33 | 1 | -4.500283 | 0.663605  | 2.545548  |
| 34 | 1 | -3.930583 | 2.010342  | 1.542238  |
| 35 | 1 | -2.936511 | 1.424839  | 2.879960  |
| 36 | 1 | -5.309870 | 0.271745  | -0.882313 |
| 37 | 1 | -4.058268 | 0.642961  | -2.083471 |
| 38 | 1 | -4.312117 | 1.726461  | -0.713545 |
| 39 | 1 | -3.815923 | -2.380466 | -2.059175 |
| 40 | 1 | -2.089942 | -2.743635 | -2.164355 |
| 41 | 1 | -2.711451 | -1.215508 | -2.808141 |
| 42 | 1 | -1.745237 | -3.874372 | 0.888895  |
| 43 | 1 | -0.204255 | -3.034057 | 1.119063  |
| 44 | 1 | -0.763231 | -3.413563 | -0.507323 |
| 45 | 1 | -1.465887 | 1.808574  | 0.600860  |
| 46 | 6 | 1.790475  | -1.334926 | 0.054098  |
| 47 | 6 | 1.926928  | -2.067585 | -1.151167 |
| 48 | 6 | 2.589591  | -1.659194 | 1.182749  |
| 49 | 6 | 2.840674  | -3.134496 | -1.192842 |
| 50 | 6 | 3.487019  | -2.735006 | 1.097120  |
| 51 | 6 | 3.612610  | -3.475450 | -0.080343 |
| 52 | 1 | 2.949125  | -3.693201 | -2.117954 |
| 53 | 1 | 4.089782  | -2.987098 | 1.964898  |
| 54 | 1 | 4.310928  | -4.304691 | -0.133324 |
| 55 | 6 | 1.140077  | -1.722909 | -2.395299 |
| 56 | 1 | 0.077157  | -1.966212 | -2.293148 |
| 57 | 1 | 1.188112  | -0.656238 | -2.629676 |
| 58 | 1 | 1.525137  | -2.280899 | -3.254600 |
| 59 | 6 | 2.493190  | -0.865081 | 2.465995  |
| 60 | 1 | 2.936999  | 0.133117  | 2.357645  |
| 61 | 1 | 1.452585  | -0.711070 | 2.767514  |
| 62 | 1 | 3.018973  | -1.378029 | 3.277057  |

7<sup>Ar</sup> (E = -1504.0864419 a.u.)

| Center Number | Atomic Number | Coordinates (Angstroms) |           |           |
|---------------|---------------|-------------------------|-----------|-----------|
|               |               | X                       | Y         | Z         |
| 1             | 22            | -0.177594               | -1.058617 | -0.259717 |
| 2             | 7             | -1.543917               | 0.297207  | 0.336167  |
| 3             | 6             | 1.051023                | -2.296279 | -1.980180 |
| 4             | 6             | -0.065264               | -1.616784 | -2.567357 |
| 5             | 6             | 0.548604                | -3.278326 | -1.088093 |
| 6             | 17            | 0.321337                | -2.022658 | 1.892700  |
| 7             | 6             | -1.255612               | -2.169905 | -2.014512 |
| 8             | 6             | -0.869883               | -3.191066 | -1.083731 |
| 9             | 6             | -2.075238               | 1.367990  | -0.377909 |
| 10            | 6             | -1.793514               | 1.794572  | -1.644844 |
| 11            | 6             | -2.599063               | 2.971256  | -1.978786 |
| 12            | 1             | -1.064697               | 1.357007  | -2.308936 |
| 13            | 6             | -3.140310               | 2.304962  | 0.180961  |
| 14            | 6             | -3.397720               | 3.289658  | -0.931135 |
| 15            | 1             | -4.048521               | 1.761606  | 0.466453  |
| 16            | 1             | -2.795580               | 2.803377  | 1.094636  |
| 17            | 6             | -4.395169               | 4.406451  | -0.788934 |
| 18            | 6             | -2.489027               | 3.662197  | -3.314506 |
| 19            | 1             | -3.160266               | 4.523552  | -3.388298 |
| 20            | 1             | -2.733706               | 2.973854  | -4.135380 |
| 21            | 1             | -1.464195               | 4.018069  | -3.489308 |
| 22            | 1             | -4.445276               | 5.023712  | -1.692341 |
| 23            | 1             | -4.142025               | 5.069164  | 0.051934  |
| 24            | 1             | -5.407400               | 4.022246  | -0.593711 |



|    |   |           |           |           |
|----|---|-----------|-----------|-----------|
| 25 | 6 | 0.009963  | -0.716073 | -3.775135 |
| 26 | 6 | 2.487750  | -2.126935 | -2.407190 |
| 27 | 6 | 1.355781  | -4.304812 | -0.340302 |
| 28 | 6 | -1.769153 | -4.142040 | -0.332822 |
| 29 | 6 | -2.654045 | -1.839624 | -2.479282 |
| 30 | 1 | 0.161339  | -1.321203 | -4.680993 |
| 31 | 1 | 0.838859  | -0.004465 | -3.708024 |
| 32 | 1 | -0.913293 | -0.146936 | -3.912381 |
| 33 | 1 | 2.702637  | -2.758962 | -3.280731 |
| 34 | 1 | 3.185437  | -2.412987 | -1.614256 |
| 35 | 1 | 2.706360  | -1.092305 | -2.689762 |
| 36 | 1 | 1.386391  | -5.246751 | -0.907531 |
| 37 | 1 | 0.923796  | -4.511602 | 0.642138  |
| 38 | 1 | 2.387722  | -3.976079 | -0.185203 |
| 39 | 1 | -1.562487 | -5.175814 | -0.641013 |
| 40 | 1 | -2.825908 | -3.947598 | -0.533525 |
| 41 | 1 | -1.607577 | -4.082977 | 0.749645  |
| 42 | 1 | -2.807559 | -2.202375 | -3.505196 |
| 43 | 1 | -2.844330 | -0.760130 | -2.476797 |
| 44 | 1 | -3.410117 | -2.310109 | -1.846497 |
| 45 | 1 | 0.337948  | 0.230607  | -1.195586 |
| 46 | 7 | 2.761784  | 0.318071  | 0.163253  |
| 47 | 6 | 1.729827  | -0.216032 | 0.020602  |
| 48 | 6 | 3.956449  | 1.012451  | 0.308745  |
| 49 | 6 | 4.190272  | 2.138025  | -0.516734 |
| 50 | 6 | 4.884147  | 0.568202  | 1.280394  |
| 51 | 6 | 5.399320  | 2.824223  | -0.346203 |
| 52 | 6 | 6.077682  | 1.290320  | 1.409514  |
| 53 | 6 | 6.334320  | 2.406039  | 0.606174  |
| 54 | 1 | 5.603782  | 3.691920  | -0.964672 |
| 55 | 1 | 6.806845  | 0.973034  | 2.147554  |
| 56 | 1 | 7.264687  | 2.951869  | 0.723485  |
| 57 | 6 | -2.043105 | 0.225572  | 1.703053  |
| 58 | 6 | -3.213892 | -0.507557 | 2.004234  |
| 59 | 6 | -1.372998 | 0.951529  | 2.718238  |
| 60 | 6 | -3.680776 | -0.531108 | 3.329270  |
| 61 | 6 | -1.872916 | 0.906176  | 4.028488  |
| 62 | 6 | -3.015489 | 0.164890  | 4.340224  |
| 63 | 1 | -4.579109 | -1.096876 | 3.560018  |
| 64 | 1 | -1.356475 | 1.459910  | 4.807516  |
| 65 | 1 | -3.388075 | 0.137239  | 5.359524  |
| 66 | 6 | -0.129369 | 1.757131  | 2.421874  |
| 67 | 1 | 0.115203  | 2.409864  | 3.266031  |
| 68 | 1 | 0.727298  | 1.095935  | 2.247017  |
| 69 | 1 | -0.244151 | 2.378071  | 1.526705  |
| 70 | 6 | -3.976401 | -1.255192 | 0.935460  |
| 71 | 1 | -4.175811 | -0.628380 | 0.059509  |
| 72 | 1 | -3.416510 | -2.126647 | 0.582796  |
| 73 | 1 | -4.934772 | -1.611732 | 1.325981  |
| 74 | 6 | 4.592306  | -0.638217 | 2.137626  |
| 75 | 1 | 3.652067  | -0.525316 | 2.689504  |
| 76 | 1 | 4.490501  | -1.546812 | 1.530996  |
| 77 | 1 | 5.396241  | -0.801776 | 2.859761  |
| 78 | 6 | 3.168971  | 2.574502  | -1.537348 |
| 79 | 1 | 2.987089  | 1.790906  | -2.283757 |
| 80 | 1 | 2.200975  | 2.795480  | -1.071256 |
| 81 | 1 | 3.507112  | 3.471047  | -2.063235 |

TS7<sup>Ar</sup>-9<sup>Ar</sup> (E = -1504.0852024 a.u.)

| Center Number | Atomic Number | Coordinates (Angstroms) |   |   |
|---------------|---------------|-------------------------|---|---|
|               |               | X                       | Y | Z |

|    |    |           |           |           |
|----|----|-----------|-----------|-----------|
| 1  | 22 | -0.955952 | -0.163079 | -0.110686 |
| 2  | 7  | 0.640647  | -1.388290 | -0.272444 |
| 3  | 6  | -2.423937 | 1.344549  | 1.126383  |
| 4  | 6  | -1.613001 | 0.597038  | 2.044269  |
| 5  | 6  | -3.288190 | 0.433453  | 0.464459  |
| 6  | 17 | -1.876338 | -0.468304 | -2.283023 |
| 7  | 6  | -1.961639 | -0.777616 | 1.921031  |
| 8  | 6  | -2.997120 | -0.875449 | 0.931806  |
| 9  | 6  | 1.757364  | -1.462879 | 0.549588  |
| 10 | 6  | 2.043986  | -0.762014 | 1.687999  |
| 11 | 6  | 3.348253  | -1.163755 | 2.219618  |
| 12 | 1  | 1.418545  | -0.010238 | 2.143244  |
| 13 | 6  | 2.928304  | -2.405343 | 0.299084  |
| 14 | 6  | 3.886116  | -2.124322 | 1.428906  |
| 15 | 1  | 2.606318  | -3.453294 | 0.287045  |
| 16 | 1  | 3.385403  | -2.226028 | -0.681054 |
| 17 | 6  | 5.194806  | -2.853718 | 1.560450  |
| 18 | 6  | 3.925741  | -0.551367 | 3.470600  |
| 19 | 1  | 4.904226  | -0.973206 | 3.720315  |
| 20 | 1  | 3.261061  | -0.712260 | 4.330728  |
| 21 | 1  | 4.046866  | 0.534861  | 3.357526  |
| 22 | 1  | 5.759378  | -2.520644 | 2.437834  |
| 23 | 1  | 5.832756  | -2.700147 | 0.677527  |
| 24 | 1  | 5.044186  | -3.939291 | 1.655610  |
| 25 | 6  | -0.787095 | 1.199911  | 3.154055  |
| 26 | 6  | -2.504411 | 2.849172  | 1.057437  |
| 27 | 6  | -4.389035 | 0.793374  | -0.496235 |
| 28 | 6  | -3.761706 | -2.110250 | 0.523334  |
| 29 | 6  | -1.447447 | -1.881472 | 2.814407  |
| 30 | 1  | -1.450811 | 1.567647  | 3.950029  |
| 31 | 1  | -0.183945 | 2.047343  | 2.813142  |
| 32 | 1  | -0.114936 | 0.464767  | 3.604536  |
| 33 | 1  | -3.254351 | 3.222403  | 1.769491  |
| 34 | 1  | -2.793722 | 3.194850  | 0.060426  |
| 35 | 1  | -1.549328 | 3.319915  | 1.309503  |
| 36 | 1  | -5.329433 | 0.954965  | 0.051015  |
| 37 | 1  | -4.553262 | 0.000587  | -1.230125 |
| 38 | 1  | -4.161253 | 1.709851  | -1.048362 |
| 39 | 1  | -4.818888 | -2.007088 | 0.802998  |
| 40 | 1  | -3.380186 | -3.008251 | 1.016017  |
| 41 | 1  | -3.722251 | -2.270595 | -0.560133 |
| 42 | 1  | -1.830938 | -1.752181 | 3.836056  |
| 43 | 1  | -0.352861 | -1.890869 | 2.869154  |
| 44 | 1  | -1.768657 | -2.865222 | 2.464436  |
| 45 | 1  | 0.254276  | 0.903254  | 0.510925  |
| 46 | 7  | 0.245100  | 2.628478  | -1.144661 |
| 47 | 6  | -0.212051 | 1.616082  | -0.715679 |
| 48 | 6  | 1.067548  | 3.732745  | -1.333000 |
| 49 | 6  | 2.137744  | 3.992701  | -0.439978 |
| 50 | 6  | 0.800176  | 4.566290  | -2.447893 |
| 51 | 6  | 2.940706  | 5.113566  | -0.690628 |
| 52 | 6  | 1.630143  | 5.675299  | -2.652820 |
| 53 | 6  | 2.691704  | 5.948216  | -1.784076 |
| 54 | 1  | 3.766600  | 5.328635  | -0.020111 |
| 55 | 1  | 1.441985  | 6.325056  | -3.501263 |
| 56 | 1  | 3.325594  | 6.811277  | -1.959787 |
| 57 | 6  | 0.698207  | -2.306337 | -1.401638 |
| 58 | 6  | 0.193981  | -3.621537 | -1.277618 |
| 59 | 6  | 1.314507  | -1.885458 | -2.605522 |
| 60 | 6  | 0.289154  | -4.493493 | -2.375092 |
| 61 | 6  | 1.392953  | -2.787546 | -3.677625 |
| 62 | 6  | 0.879647  | -4.082767 | -3.571655 |
| 63 | 1  | -0.099495 | -5.503494 | -2.279660 |
| 64 | 1  | 1.861806  | -2.464291 | -4.602669 |

|    |   |           |           |           |
|----|---|-----------|-----------|-----------|
| 65 | 1 | 0.946079  | -4.767296 | -4.411597 |
| 66 | 6 | 1.868440  | -0.488464 | -2.764329 |
| 67 | 1 | 2.480624  | -0.419643 | -3.669249 |
| 68 | 1 | 1.055995  | 0.242472  | -2.848445 |
| 69 | 1 | 2.484358  | -0.188601 | -1.909277 |
| 70 | 6 | -0.435217 | -4.110697 | 0.006647  |
| 71 | 1 | 0.179124  | -3.872352 | 0.881548  |
| 72 | 1 | -1.416341 | -3.652161 | 0.170141  |
| 73 | 1 | -0.578749 | -5.195332 | -0.025465 |
| 74 | 6 | -0.343197 | 4.258712  | -3.383327 |
| 75 | 1 | -0.235146 | 3.266289  | -3.836415 |
| 76 | 1 | -1.304670 | 4.257651  | -2.855717 |
| 77 | 1 | -0.395132 | 4.998737  | -4.186422 |
| 78 | 6 | 2.400440  | 3.095354  | 0.741558  |
| 79 | 1 | 1.554196  | 3.095553  | 1.440524  |
| 80 | 1 | 2.556125  | 2.052141  | 0.440054  |
| 81 | 1 | 3.287484  | 3.426920  | 1.288242  |

$g^{\text{Ar}}$  (E = -1504.1077694 a.u.)

| Center Number | Atomic Number | Coordinates (Angstroms) |           |           |
|---------------|---------------|-------------------------|-----------|-----------|
|               |               | X                       | Y         | Z         |
| 1             | 22            | 0.418816                | -0.894489 | -0.131717 |
| 2             | 7             | -1.327932               | 0.005884  | 0.324275  |
| 3             | 6             | 1.847728                | -2.246554 | -1.677164 |
| 4             | 6             | 0.568391                | -1.992628 | -2.265222 |
| 5             | 6             | 1.650762                | -3.040800 | -0.528563 |
| 6             | 17            | 1.086841                | -1.289724 | 2.122167  |
| 7             | 6             | -0.421142               | -2.663780 | -1.485275 |
| 8             | 6             | 0.245581                | -3.288410 | -0.391946 |
| 9             | 6             | -2.136860               | 0.728251  | -0.547220 |
| 10            | 6             | -2.044566               | 0.878900  | -1.902464 |
| 11            | 6             | -3.111119               | 1.755734  | -2.393867 |
| 12            | 1             | -1.309076               | 0.422741  | -2.544781 |
| 13            | 6             | -3.342597               | 1.542654  | -0.091089 |
| 14            | 6             | -3.882877               | 2.159329  | -1.356270 |
| 15            | 1             | -4.089731               | 0.914483  | 0.406989  |
| 16            | 1             | -3.056286               | 2.300647  | 0.647403  |
| 17            | 6             | -5.090694               | 3.055669  | -1.349112 |
| 18            | 6             | -3.253510               | 2.099595  | -3.855014 |
| 19            | 1             | -4.103880               | 2.763378  | -4.039329 |
| 20            | 1             | -3.397054               | 1.193962  | -4.460642 |
| 21            | 1             | -2.350063               | 2.598302  | -4.232795 |
| 22            | 1             | -5.341171               | 3.407813  | -2.355479 |
| 23            | 1             | -4.932096               | 3.942177  | -0.717386 |
| 24            | 1             | -5.975161               | 2.537961  | -0.949307 |
| 25            | 6             | 0.364058                | -1.428049 | -3.648888 |
| 26            | 6             | 3.157880                | -1.836904 | -2.298822 |
| 27            | 6             | 2.707033                | -3.657650 | 0.348411  |
| 28            | 6             | -0.336203               | -4.222036 | 0.639771  |
| 29            | 6             | -1.861658               | -2.833978 | -1.905772 |
| 30            | 1             | 0.639778                | -2.183146 | -4.399681 |
| 31            | 1             | 0.984230                | -0.545459 | -3.837591 |
| 32            | 1             | -0.679440               | -1.156946 | -3.829645 |
| 33            | 1             | 3.287466                | -2.333794 | -3.270147 |
| 34            | 1             | 4.007521                | -2.117657 | -1.671502 |
| 35            | 1             | 3.215514                | -0.756627 | -2.477831 |
| 36            | 1             | 2.800132                | -4.730454 | 0.126273  |
| 37            | 1             | 2.452589                | -3.551898 | 1.406893  |
| 38            | 1             | 3.687411                | -3.199590 | 0.191900  |
| 39            | 1             | 0.213354                | -5.172552 | 0.635666  |
| 40            | 1             | -1.385551               | -4.450641 | 0.435481  |
| 41            | 1             | -0.263404               | -3.805987 | 1.651084  |
| 42            | 1             | -1.905359               | -3.310328 | -2.894507 |
| 43            | 1             | -2.396544               | -1.880467 | -1.973450 |
| 44            | 1             | -2.408040               | -3.473144 | -1.209139 |

|    |   |           |           |           |
|----|---|-----------|-----------|-----------|
| 45 | 1 | 0.967618  | 1.320833  | -2.178645 |
| 46 | 7 | 1.797675  | 0.747636  | -0.331866 |
| 47 | 6 | 0.993967  | 0.671989  | -1.305181 |
| 48 | 6 | 2.791214  | 1.735766  | -0.025929 |
| 49 | 6 | 2.554043  | 3.110466  | -0.306966 |
| 50 | 6 | 3.988321  | 1.321491  | 0.611851  |
| 51 | 6 | 3.535083  | 4.042992  | 0.067646  |
| 52 | 6 | 4.940882  | 2.293805  | 0.949216  |
| 53 | 6 | 4.721462  | 3.646151  | 0.684449  |
| 54 | 1 | 3.353234  | 5.095164  | -0.129052 |
| 55 | 1 | 5.859990  | 1.977095  | 1.432098  |
| 56 | 1 | 5.464795  | 4.385743  | 0.963866  |
| 57 | 6 | -1.819175 | 0.024906  | 1.699547  |
| 58 | 6 | -2.792881 | -0.910021 | 2.122593  |
| 59 | 6 | -1.369713 | 1.032667  | 2.587871  |
| 60 | 6 | -3.271402 | -0.849650 | 3.442479  |
| 61 | 6 | -1.874796 | 1.061603  | 3.896944  |
| 62 | 6 | -2.813610 | 0.123404  | 4.331728  |
| 63 | 1 | -4.015412 | -1.572954 | 3.764088  |
| 64 | 1 | -1.522447 | 1.831645  | 4.577198  |
| 65 | 1 | -3.190736 | 0.156875  | 5.349130  |
| 66 | 6 | -0.358552 | 2.070417  | 2.164656  |
| 67 | 1 | -0.248584 | 2.836337  | 2.938742  |
| 68 | 1 | 0.622914  | 1.615615  | 1.996193  |
| 69 | 1 | -0.652934 | 2.568334  | 1.234617  |
| 70 | 6 | -3.345100 | -1.960243 | 1.189001  |
| 71 | 1 | -3.701847 | -1.526899 | 0.248140  |
| 72 | 1 | -2.583548 | -2.699696 | 0.929557  |
| 73 | 1 | -4.180398 | -2.489402 | 1.658129  |
| 74 | 6 | 4.285251  | -0.130123 | 0.899044  |
| 75 | 1 | 3.427192  | -0.638511 | 1.344348  |
| 76 | 1 | 4.549822  | -0.668503 | -0.019333 |
| 77 | 1 | 5.133792  | -0.214396 | 1.584782  |
| 78 | 6 | 1.297158  | 3.635317  | -0.969644 |
| 79 | 1 | 1.358381  | 3.581996  | -2.064788 |
| 80 | 1 | 0.399065  | 3.087928  | -0.670286 |
| 81 | 1 | 1.151373  | 4.687748  | -0.707962 |

**TS9<sup>Ar</sup>-10<sup>Ar</sup>** (E = -1504.0893298 a.u.)

| Center Number | Atomic Number | Coordinates (Angstroms) |           |           |
|---------------|---------------|-------------------------|-----------|-----------|
|               |               | X                       | Y         | Z         |
| 1             | 22            | -0.675567               | -0.452366 | 0.103714  |
| 2             | 7             | -1.916620               | 0.991565  | -0.543833 |
| 3             | 6             | -2.070694               | 0.884930  | 0.756485  |
| 4             | 7             | 0.800378                | 1.001596  | 0.694364  |
| 5             | 6             | -2.260009               | -2.272720 | 0.494295  |
| 6             | 6             | -1.797835               | -1.780945 | 1.754289  |
| 7             | 6             | -1.157956               | -2.856716 | -0.176341 |
| 8             | 17            | 0.470989                | -0.755227 | -1.986592 |
| 9             | 6             | -0.404224               | -2.074012 | 1.860695  |
| 10            | 6             | -0.004101               | -2.723540 | 0.657978  |
| 11            | 6             | 0.355198                | 1.887569  | 1.567488  |
| 12            | 6             | -0.859925               | 1.749146  | 2.290645  |
| 13            | 1             | -3.016802               | 1.052258  | 1.264687  |
| 14            | 6             | -1.094708               | 3.023371  | 3.008993  |
| 15            | 1             | -1.087034               | 0.828342  | 2.806773  |
| 16            | 6             | 0.936448                | 3.259201  | 1.855852  |
| 17            | 6             | -0.094835               | 3.897433  | 2.760686  |
| 18            | 1             | 1.909019                | 3.161371  | 2.357443  |
| 19            | 1             | 1.131711                | 3.831877  | 0.943871  |
| 20            | 6             | 0.091920                | 5.301123  | 3.266835  |
| 21            | 6             | -2.296472               | 3.211896  | 3.897070  |
| 22            | 1             | -2.294092               | 4.185835  | 4.395276  |
| 23            | 1             | -2.330447               | 2.435387  | 4.674098  |
| 24            | 1             | -3.230658               | 3.129995  | 3.324820  |

|    |   |           |           |           |
|----|---|-----------|-----------|-----------|
| 25 | 1 | -0.716482 | 5.606327  | 3.938482  |
| 26 | 1 | 0.127341  | 6.023080  | 2.437919  |
| 27 | 1 | 1.040132  | 5.402455  | 3.814424  |
| 28 | 6 | -2.694919 | -1.370752 | 2.894502  |
| 29 | 6 | -3.711574 | -2.304126 | 0.083233  |
| 30 | 6 | -1.188554 | -3.621286 | -1.472969 |
| 31 | 6 | 1.345605  | -3.310140 | 0.331415  |
| 32 | 6 | 0.398768  | -1.913072 | 3.131137  |
| 33 | 1 | -3.069212 | -2.267491 | 3.410454  |
| 34 | 1 | -3.566685 | -0.805543 | 2.551375  |
| 35 | 1 | -2.170663 | -0.766556 | 3.641148  |
| 36 | 1 | -4.278936 | -2.967860 | 0.750675  |
| 37 | 1 | -3.837256 | -2.682195 | -0.934637 |
| 38 | 1 | -4.180097 | -1.314125 | 0.135443  |
| 39 | 1 | -1.206174 | -4.701726 | -1.269017 |
| 40 | 1 | -0.307623 | -3.403359 | -2.082361 |
| 41 | 1 | -2.072847 | -3.380713 | -2.069848 |
| 42 | 1 | 1.281195  | -4.405392 | 0.269843  |
| 43 | 1 | 2.092192  | -3.066712 | 1.092515  |
| 44 | 1 | 1.714150  | -2.942982 | -0.632682 |
| 45 | 1 | -0.083529 | -2.466162 | 3.948222  |
| 46 | 1 | 0.490898  | -0.869503 | 3.452499  |
| 47 | 1 | 1.408813  | -2.313536 | 3.018671  |
| 48 | 6 | -2.699039 | 1.734937  | -1.486839 |
| 49 | 6 | -3.138972 | 1.109626  | -2.684643 |
| 50 | 6 | -3.034609 | 3.094426  | -1.233691 |
| 51 | 6 | -3.911685 | 1.850697  | -3.592853 |
| 52 | 6 | -3.799350 | 3.793479  | -2.180637 |
| 53 | 6 | -4.242918 | 3.183912  | -3.353951 |
| 54 | 1 | -4.253253 | 1.361897  | -4.500360 |
| 55 | 1 | -4.040389 | 4.834462  | -1.985956 |
| 56 | 1 | -4.835523 | 3.740799  | -4.072633 |
| 57 | 6 | 2.088616  | 1.295639  | 0.085640  |
| 58 | 6 | 2.163342  | 2.109169  | -1.071952 |
| 59 | 6 | 3.263779  | 0.795005  | 0.691286  |
| 60 | 6 | 3.429826  | 2.382478  | -1.614978 |
| 61 | 6 | 4.508404  | 1.090405  | 0.111304  |
| 62 | 6 | 4.596318  | 1.876194  | -1.038264 |
| 63 | 1 | 3.491027  | 3.000686  | -2.505657 |
| 64 | 1 | 5.409679  | 0.700789  | 0.575514  |
| 65 | 1 | 5.563770  | 2.096508  | -1.478336 |
| 66 | 6 | -2.828287 | -0.329715 | -3.014435 |
| 67 | 1 | -1.763766 | -0.477854 | -3.215956 |
| 68 | 1 | -3.084742 | -0.998179 | -2.188337 |
| 69 | 1 | -3.396612 | -0.645889 | -3.894920 |
| 70 | 6 | -2.576850 | 3.839224  | 0.000125  |
| 71 | 1 | -3.100844 | 3.512920  | 0.904884  |
| 72 | 1 | -1.510510 | 3.704494  | 0.192568  |
| 73 | 1 | -2.765256 | 4.910619  | -0.119692 |
| 74 | 6 | 3.210941  | -0.042170 | 1.947401  |
| 75 | 1 | 4.221348  | -0.265553 | 2.302698  |
| 76 | 1 | 2.672294  | 0.462624  | 2.758181  |
| 77 | 1 | 2.698825  | -0.991841 | 1.768824  |
| 78 | 6 | 0.938704  | 2.689400  | -1.740101 |
| 79 | 1 | 0.274549  | 1.896993  | -2.093526 |
| 80 | 1 | 0.354349  | 3.322631  | -1.063489 |
| 81 | 1 | 1.231788  | 3.303178  | -2.597316 |

$10^{\text{Ar}}$  (E = -1504.1214911 a.u.)

| Center Number | Atomic Number | Coordinates (Angstroms) |   |   |
|---------------|---------------|-------------------------|---|---|
|               |               | X                       | Y | Z |

|    |    |           |           |           |
|----|----|-----------|-----------|-----------|
| 1  | 22 | -0.013486 | 1.082581  | 0.117338  |
| 2  | 7  | -1.625544 | 0.102597  | 0.029464  |
| 3  | 6  | -1.102815 | -0.056044 | -1.266636 |
| 4  | 7  | 1.391381  | -0.768264 | -0.151973 |
| 5  | 6  | -0.329386 | 3.005155  | -1.334037 |
| 6  | 6  | 0.947284  | 2.459761  | -1.663816 |
| 7  | 6  | -0.277593 | 3.473420  | 0.006799  |
| 8  | 17 | -0.258541 | 1.193180  | 2.511988  |
| 9  | 6  | 1.802770  | 2.635286  | -0.537616 |
| 10 | 6  | 1.046043  | 3.249257  | 0.495427  |
| 11 | 6  | 0.783680  | -1.673475 | -0.833613 |
| 12 | 6  | -0.427361 | -1.363058 | -1.661674 |
| 13 | 1  | -1.636553 | 0.408782  | -2.098161 |
| 14 | 6  | -1.133989 | -2.720529 | -1.715878 |
| 15 | 1  | -0.030191 | -1.175293 | -2.677407 |
| 16 | 6  | 1.045753  | -3.158834 | -0.886722 |
| 17 | 6  | -0.311062 | -3.702625 | -1.310907 |
| 18 | 1  | 1.823819  | -3.401929 | -1.624070 |
| 19 | 1  | 1.402146  | -3.546357 | 0.073012  |
| 20 | 6  | -0.557556 | -5.186022 | -1.268473 |
| 21 | 6  | -2.529249 | -2.830729 | -2.261844 |
| 22 | 1  | -2.890872 | -3.863028 | -2.269165 |
| 23 | 1  | -2.573028 | -2.448112 | -3.291978 |
| 24 | 1  | -3.226517 | -2.228406 | -1.667239 |
| 25 | 1  | -1.568510 | -5.445763 | -1.594873 |
| 26 | 1  | -0.421108 | -5.575945 | -0.249905 |
| 27 | 1  | 0.154554  | -5.721867 | -1.912422 |
| 28 | 6  | 1.333150  | 2.037424  | -3.060148 |
| 29 | 6  | -1.410036 | 3.268764  | -2.351090 |
| 30 | 6  | -1.359747 | 4.213341  | 0.753818  |
| 31 | 6  | 1.606016  | 3.760873  | 1.796356  |
| 32 | 6  | 3.289155  | 2.385178  | -0.462097 |
| 33 | 1  | 1.230545  | 2.885889  | -3.751841 |
| 34 | 1  | 0.694504  | 1.232067  | -3.441393 |
| 35 | 1  | 2.371605  | 1.701880  | -3.113499 |
| 36 | 1  | -1.047918 | 4.006677  | -3.081674 |
| 37 | 1  | -2.312592 | 3.679642  | -1.893770 |
| 38 | 1  | -1.691858 | 2.371653  | -2.912148 |
| 39 | 1  | -1.162675 | 5.294952  | 0.742436  |
| 40 | 1  | -1.411580 | 3.892301  | 1.798627  |
| 41 | 1  | -2.346127 | 4.052291  | 0.309085  |
| 42 | 1  | 2.015900  | 4.772530  | 1.656224  |
| 43 | 1  | 2.412781  | 3.123096  | 2.171134  |
| 44 | 1  | 0.839018  | 3.807327  | 2.572478  |
| 45 | 1  | 3.825532  | 3.342730  | -0.407016 |
| 46 | 1  | 3.658834  | 1.851476  | -1.340017 |
| 47 | 1  | 3.571492  | 1.804506  | 0.422378  |
| 48 | 6  | -2.903936 | -0.314677 | 0.515230  |
| 49 | 6  | -4.094521 | 0.287761  | 0.027333  |
| 50 | 6  | -2.993778 | -1.352523 | 1.480906  |
| 51 | 6  | -5.339359 | -0.158058 | 0.498901  |
| 52 | 6  | -4.259925 | -1.768467 | 1.924388  |
| 53 | 6  | -5.430908 | -1.182904 | 1.441148  |
| 54 | 1  | -6.241240 | 0.316986  | 0.122652  |
| 55 | 1  | -4.316973 | -2.565724 | 2.660104  |
| 56 | 1  | -6.400227 | -1.516720 | 1.798097  |
| 57 | 6  | 2.711182  | -1.107529 | 0.370083  |
| 58 | 6  | 3.796770  | -1.086254 | -0.543230 |
| 59 | 6  | 2.919908  | -1.449303 | 1.727984  |
| 60 | 6  | 5.094001  | -1.321196 | -0.059660 |
| 61 | 6  | 4.236330  | -1.680686 | 2.162986  |
| 62 | 6  | 5.320489  | -1.601716 | 1.288072  |
| 63 | 1  | 5.926461  | -1.287527 | -0.756263 |
| 64 | 1  | 4.398761  | -1.937898 | 3.205047  |

|    |   |           |           |           |
|----|---|-----------|-----------|-----------|
| 65 | 1 | 6.328854  | -1.775079 | 1.649643  |
| 66 | 6 | -4.051887 | 1.419462  | -0.967967 |
| 67 | 1 | -3.335165 | 2.182447  | -0.654885 |
| 68 | 1 | -3.745291 | 1.082474  | -1.966363 |
| 69 | 1 | -5.036425 | 1.887832  | -1.064047 |
| 70 | 6 | -1.765551 | -2.031723 | 2.032835  |
| 71 | 1 | -1.183112 | -2.511028 | 1.237571  |
| 72 | 1 | -1.114229 | -1.308620 | 2.528754  |
| 73 | 1 | -2.047538 | -2.804108 | 2.756239  |
| 74 | 6 | 3.605986  | -0.870605 | -2.029512 |
| 75 | 1 | 4.508998  | -0.442673 | -2.476177 |
| 76 | 1 | 3.414586  | -1.821805 | -2.546228 |
| 77 | 1 | 2.766373  | -0.211637 | -2.250630 |
| 78 | 6 | 1.784272  | -1.648879 | 2.699851  |
| 79 | 1 | 2.173062  | -1.929682 | 3.683084  |
| 80 | 1 | 1.175962  | -0.749103 | 2.815838  |
| 81 | 1 | 1.112182  | -2.449493 | 2.367905  |

**11<sup>Ar</sup>** (E = -1504.1147989 a.u.)

| Center Number | Atomic Number | Coordinates (Angstroms) |           |           |
|---------------|---------------|-------------------------|-----------|-----------|
|               |               | X                       | Y         | Z         |
| 1             | 22            | 2.168923                | -0.191851 | 0.518362  |
| 2             | 7             | 0.631337                | 0.763416  | 0.053415  |
| 3             | 6             | 0.399402                | -0.493594 | -0.560570 |
| 4             | 7             | -2.745751               | -0.234007 | 0.580757  |
| 5             | 6             | 3.562207                | 0.804594  | -1.090924 |
| 6             | 6             | 3.504781                | -0.594018 | -1.392583 |
| 7             | 6             | 4.204574                | 0.950145  | 0.170466  |
| 8             | 17            | 2.008834                | -1.281518 | 2.572233  |
| 9             | 6             | 4.158848                | -1.294576 | -0.327761 |
| 10            | 6             | 4.587331                | -0.345827 | 0.634420  |
| 11            | 6             | -2.131623               | -1.067016 | -0.154597 |
| 12            | 6             | -0.657484               | -1.434182 | 0.067253  |
| 13            | 1             | 0.412273                | -0.544216 | -1.647668 |
| 14            | 6             | -0.599033               | -2.832729 | -0.534946 |
| 15            | 1             | -0.487342               | -1.450432 | 1.147856  |
| 16            | 6             | -2.715449               | -2.010110 | -1.195406 |
| 17            | 6             | -1.699737               | -3.128523 | -1.245983 |
| 18            | 1             | -3.716065               | -2.350676 | -0.906774 |
| 19            | 1             | -2.832794               | -1.512680 | -2.168883 |
| 20            | 6             | -2.017022               | -4.385202 | -2.011527 |
| 21            | 6             | 0.593533                | -3.713722 | -0.285608 |
| 22            | 1             | 0.512735                | -4.677582 | -0.796802 |
| 23            | 1             | 0.711393                | -3.904682 | 0.789511  |
| 24            | 1             | 1.518085                | -3.228266 | -0.619200 |
| 25            | 1             | -1.204257               | -5.116251 | -1.974357 |
| 26            | 1             | -2.218183               | -4.156249 | -3.067913 |
| 27            | 1             | -2.922651               | -4.865320 | -1.614622 |
| 28            | 6             | 3.063836                | -1.198656 | -2.703001 |
| 29            | 6             | 3.203311                | 1.944628  | -2.012154 |
| 30            | 6             | 4.514128                | 2.262946  | 0.849671  |
| 31            | 6             | 5.381404                | -0.651348 | 1.877783  |
| 32            | 6             | 4.422270                | -2.778391 | -0.250586 |
| 33            | 1             | 3.907866                | -1.244361 | -3.405613 |
| 34            | 1             | 2.271906                | -0.611703 | -3.176903 |
| 35            | 1             | 2.683917                | -2.216762 | -2.576442 |
| 36            | 1             | 4.115586                | 2.462394  | -2.338219 |
| 37            | 1             | 2.553813                | 2.686225  | -1.535933 |
| 38            | 1             | 2.694705                | 1.585833  | -2.910203 |
| 39            | 1             | 5.518851                | 2.608619  | 0.567669  |
| 40            | 1             | 4.496487                | 2.176355  | 1.941326  |
| 41            | 1             | 3.806385                | 3.045590  | 0.558988  |
| 42            | 1             | 6.452163                | -0.716618 | 1.637360  |
| 43            | 1             | 5.078596                | -1.602193 | 2.325494  |
| 44            | 1             | 5.260377                | 0.125114  | 2.639062  |

|    |   |           |           |           |
|----|---|-----------|-----------|-----------|
| 45 | 1 | 5.487183  | -2.982730 | -0.428402 |
| 46 | 1 | 3.853605  | -3.332895 | -1.001856 |
| 47 | 1 | 4.170575  | -3.186812 | 0.734344  |
| 48 | 6 | 0.092175  | 2.056982  | -0.134776 |
| 49 | 6 | 0.129121  | 2.933136  | 0.988778  |
| 50 | 6 | -0.436239 | 2.522611  | -1.372343 |
| 51 | 6 | -0.364610 | 4.238117  | 0.862335  |
| 52 | 6 | -0.916747 | 3.841076  | -1.447048 |
| 53 | 6 | -0.886884 | 4.699803  | -0.347583 |
| 54 | 1 | -0.345768 | 4.891311  | 1.729864  |
| 55 | 1 | -1.317272 | 4.191766  | -2.393961 |
| 56 | 1 | -1.268377 | 5.712151  | -0.431792 |
| 57 | 6 | -4.164590 | -0.093976 | 0.515653  |
| 58 | 6 | -4.802803 | 0.719608  | -0.449052 |
| 59 | 6 | -4.917221 | -0.724734 | 1.539255  |
| 60 | 6 | -6.198783 | 0.867086  | -0.387133 |
| 61 | 6 | -6.309045 | -0.556117 | 1.559297  |
| 62 | 6 | -6.953701 | 0.232866  | 0.602236  |
| 63 | 1 | -6.690407 | 1.494882  | -1.125271 |
| 64 | 1 | -6.885668 | -1.042810 | 2.340948  |
| 65 | 1 | -8.031154 | 0.360652  | 0.633906  |
| 66 | 6 | -4.225279 | -1.564156 | 2.589087  |
| 67 | 1 | -3.776312 | -2.469939 | 2.160008  |
| 68 | 1 | -3.408237 | -1.007615 | 3.064114  |
| 69 | 1 | -4.931625 | -1.876619 | 3.364221  |
| 70 | 6 | -4.013097 | 1.436478  | -1.519002 |
| 71 | 1 | -3.163776 | 1.980460  | -1.093561 |
| 72 | 1 | -3.609499 | 0.741996  | -2.267398 |
| 73 | 1 | -4.647458 | 2.153978  | -2.048919 |
| 74 | 6 | 0.677504  | 2.473211  | 2.320054  |
| 75 | 1 | 0.301519  | 1.481046  | 2.588069  |
| 76 | 1 | 1.776518  | 2.416508  | 2.319296  |
| 77 | 1 | 0.399740  | 3.174723  | 3.112865  |
| 78 | 6 | -0.494283 | 1.673877  | -2.623693 |
| 79 | 1 | 0.493506  | 1.307843  | -2.921143 |
| 80 | 1 | -1.137910 | 0.796634  | -2.498555 |
| 81 | 1 | -0.893383 | 2.262278  | -3.455727 |

TS11<sup>Ar</sup>-20<sup>Ar</sup> (E = -1504.0862955 a.u.)

| Center Number | Atomic Number | Coordinates (Angstroms) |           |           |
|---------------|---------------|-------------------------|-----------|-----------|
|               |               | X                       | Y         | Z         |
| 1             | 22            | 1.060059                | 0.029256  | -0.357112 |
| 2             | 7             | 0.193741                | -0.850320 | 1.182214  |
| 3             | 6             | -0.339934               | 0.418776  | 1.259254  |
| 4             | 7             | -2.363739               | -1.143452 | -0.339280 |
| 5             | 6             | 3.194347                | 0.281312  | 0.572039  |
| 6             | 6             | 2.551950                | 1.552654  | 0.681852  |
| 7             | 6             | 3.400966                | 0.021490  | -0.816672 |
| 8             | 17            | 0.759414                | -1.296636 | -2.263811 |
| 9             | 6             | 2.359768                | 2.068774  | -0.639583 |
| 10            | 6             | 2.879999                | 1.119670  | -1.557656 |
| 11            | 6             | -2.180840               | 0.092292  | -0.541349 |
| 12            | 6             | -1.119416               | 0.921979  | 0.180321  |
| 13            | 1             | -0.086068               | 1.087956  | 2.072572  |
| 14            | 6             | -1.724611               | 2.300421  | 0.228042  |
| 15            | 1             | -0.126453               | 1.117352  | -1.018512 |
| 16            | 6             | -3.064506               | 1.075293  | -1.285045 |
| 17            | 6             | -2.792968               | 2.383362  | -0.586908 |
| 18            | 1             | -2.790096               | 1.125695  | -2.347283 |
| 19            | 1             | -4.115219               | 0.772275  | -1.245504 |
| 20            | 6             | -3.686627               | 3.562620  | -0.849730 |
| 21            | 6             | -1.209963               | 3.380142  | 1.140529  |
| 22            | 1             | -1.811318               | 4.288967  | 1.057184  |
| 23            | 1             | -0.173928               | 3.645091  | 0.912489  |
| 24            | 1             | -1.241445               | 3.060231  | 2.190171  |



|    |   |           |           |           |
|----|---|-----------|-----------|-----------|
| 25 | 1 | -3.379329 | 4.459861  | -0.306196 |
| 26 | 1 | -4.724164 | 3.333359  | -0.569639 |
| 27 | 1 | -3.695492 | 3.803147  | -1.922200 |
| 28 | 6 | 2.400552  | 2.305974  | 1.981487  |
| 29 | 6 | 3.747707  | -0.512385 | 1.730592  |
| 30 | 6 | 4.153747  | -1.140435 | -1.414267 |
| 31 | 6 | 2.947630  | 1.289258  | -3.052196 |
| 32 | 6 | 1.900609  | 3.457099  | -1.020901 |
| 33 | 1 | 3.358914  | 2.770781  | 2.254521  |
| 34 | 1 | 2.117516  | 1.644715  | 2.807012  |
| 35 | 1 | 1.657009  | 3.104050  | 1.920532  |
| 36 | 1 | 4.686212  | -0.062631 | 2.085168  |
| 37 | 1 | 3.966484  | -1.545770 | 1.448477  |
| 38 | 1 | 3.054557  | -0.544640 | 2.576408  |
| 39 | 1 | 5.169724  | -0.823953 | -1.689857 |
| 40 | 1 | 3.661720  | -1.517113 | -2.315555 |
| 41 | 1 | 4.249495  | -1.972948 | -0.711532 |
| 42 | 1 | 3.915718  | 1.720355  | -3.346514 |
| 43 | 1 | 2.160893  | 1.957841  | -3.415688 |
| 44 | 1 | 2.833523  | 0.331680  | -3.567726 |
| 45 | 1 | 2.732030  | 4.010346  | -1.478342 |
| 46 | 1 | 1.573698  | 4.029754  | -0.149652 |
| 47 | 1 | 1.078228  | 3.443209  | -1.743822 |
| 48 | 6 | 0.343797  | -1.745203 | 2.259989  |
| 49 | 6 | 1.008061  | -2.977876 | 1.977654  |
| 50 | 6 | -0.165159 | -1.520368 | 3.577772  |
| 51 | 6 | 1.237141  | -3.898467 | 3.005468  |
| 52 | 6 | 0.088763  | -2.483183 | 4.570779  |
| 53 | 6 | 0.798653  | -3.653747 | 4.308641  |
| 54 | 1 | 1.748577  | -4.827015 | 2.769064  |
| 55 | 1 | -0.299213 | -2.303998 | 5.569559  |
| 56 | 1 | 0.979114  | -4.376439 | 5.097678  |
| 57 | 6 | -3.503660 | -1.841484 | -0.826600 |
| 58 | 6 | -4.373135 | -2.368559 | 0.166863  |
| 59 | 6 | -3.731011 | -2.112676 | -2.198526 |
| 60 | 6 | -5.486420 | -3.118360 | -0.231671 |
| 61 | 6 | -4.852685 | -2.886778 | -2.548288 |
| 62 | 6 | -5.732026 | -3.379154 | -1.583716 |
| 63 | 1 | -6.155134 | -3.511432 | 0.528825  |
| 64 | 1 | -5.022925 | -3.107176 | -3.598603 |
| 65 | 1 | -6.590821 | -3.973675 | -1.879056 |
| 66 | 6 | -2.801799 | -1.628136 | -3.289797 |
| 67 | 1 | -3.094442 | -0.637850 | -3.666890 |
| 68 | 1 | -1.767089 | -1.556542 | -2.946755 |
| 69 | 1 | -2.829863 | -2.313586 | -4.143528 |
| 70 | 6 | -4.098767 | -2.115727 | 1.631606  |
| 71 | 1 | -3.073288 | -2.401864 | 1.893905  |
| 72 | 1 | -4.204235 | -1.053550 | 1.890552  |
| 73 | 1 | -4.792626 | -2.683244 | 2.259307  |
| 74 | 6 | 1.422441  | -3.325718 | 0.571247  |
| 75 | 1 | 0.577418  | -3.256108 | -0.120469 |
| 76 | 1 | 2.194406  | -2.651316 | 0.182406  |
| 77 | 1 | 1.824609  | -4.342898 | 0.529900  |
| 78 | 6 | -1.015615 | -0.330737 | 3.992760  |
| 79 | 1 | -0.425361 | 0.577058  | 4.170647  |
| 80 | 1 | -1.778967 | -0.086541 | 3.247726  |
| 81 | 1 | -1.530128 | -0.564422 | 4.930356  |

$20^{\text{Ar}}$  (E = -1504.1074208 a.u.)

| Center Number | Atomic Number | Coordinates (Angstroms) |           |           |
|---------------|---------------|-------------------------|-----------|-----------|
|               |               | X                       | Y         | Z         |
| 1             | 22            | -2.619748               | 0.560477  | 0.100363  |
| 2             | 7             | -0.744845               | 0.020213  | -0.135771 |
| 3             | 6             | -0.140634               | 1.255175  | -0.239677 |
| 4             | 7             | 2.750471                | -0.049657 | 0.133178  |

|    |    |           |           |           |
|----|----|-----------|-----------|-----------|
| 5  | 6  | -3.618735 | -1.603631 | 0.288609  |
| 6  | 6  | -3.689041 | -1.208218 | -1.075349 |
| 7  | 6  | -4.404544 | -0.687578 | 1.053339  |
| 8  | 17 | -2.755251 | 2.112108  | 1.783105  |
| 9  | 6  | -4.524013 | -0.051935 | -1.162036 |
| 10 | 6  | -4.974405 | 0.257469  | 0.156850  |
| 11 | 6  | 2.475230  | 1.162540  | -0.162412 |
| 12 | 6  | 1.128897  | 1.763939  | -0.295180 |
| 13 | 1  | -0.893689 | 2.045392  | -0.312053 |
| 14 | 6  | 1.339571  | 3.220191  | -0.490765 |
| 15 | 1  | -2.850342 | 1.574031  | -1.208098 |
| 16 | 6  | 3.490994  | 2.284642  | -0.367713 |
| 17 | 6  | 2.654471  | 3.522079  | -0.539138 |
| 18 | 1  | 4.173968  | 2.350034  | 0.487848  |
| 19 | 1  | 4.125045  | 2.083824  | -1.240866 |
| 20 | 6  | 3.315374  | 4.857888  | -0.734662 |
| 21 | 6  | 0.194189  | 4.191357  | -0.620047 |
| 22 | 1  | 0.551795  | 5.216050  | -0.749122 |
| 23 | 1  | -0.448281 | 4.172513  | 0.270300  |
| 24 | 1  | -0.441295 | 3.949637  | -1.482980 |
| 25 | 1  | 2.594410  | 5.671895  | -0.852928 |
| 26 | 1  | 3.961400  | 4.848103  | -1.624858 |
| 27 | 1  | 3.962318  | 5.103205  | 0.120244  |
| 28 | 6  | -3.159948 | -1.992953 | -2.246965 |
| 29 | 6  | -3.033076 | -2.895416 | 0.796875  |
| 30 | 6  | -4.674512 | -0.783102 | 2.533124  |
| 31 | 6  | -5.930036 | 1.366802  | 0.512018  |
| 32 | 6  | -5.041561 | 0.570445  | -2.434463 |
| 33 | 1  | -3.891238 | -2.760814 | -2.537913 |
| 34 | 1  | -2.222349 | -2.501687 | -2.010025 |
| 35 | 1  | -2.989583 | -1.355615 | -3.119064 |
| 36 | 1  | -3.786725 | -3.691642 | 0.712092  |
| 37 | 1  | -2.743069 | -2.832384 | 1.848918  |
| 38 | 1  | -2.155871 | -3.205016 | 0.225831  |
| 39 | 1  | -5.559718 | -1.408522 | 2.715045  |
| 40 | 1  | -4.859448 | 0.199971  | 2.973633  |
| 41 | 1  | -3.835806 | -1.235251 | 3.071326  |
| 42 | 1  | -6.965731 | 1.041943  | 0.338605  |
| 43 | 1  | -5.757473 | 2.260404  | -0.096212 |
| 44 | 1  | -5.838958 | 1.657409  | 1.561294  |
| 45 | 1  | -5.945961 | 0.042146  | -2.768420 |
| 46 | 1  | -4.305313 | 0.517239  | -3.241126 |
| 47 | 1  | -5.301321 | 1.622847  | -2.291169 |
| 48 | 6  | -0.036796 | -1.223060 | -0.227395 |
| 49 | 6  | 0.226930  | -1.953676 | 0.952362  |
| 50 | 6  | 0.339895  | -1.716710 | -1.496056 |
| 51 | 6  | 0.839177  | -3.210002 | 0.838703  |
| 52 | 6  | 0.938285  | -2.986071 | -1.566925 |
| 53 | 6  | 1.182976  | -3.732854 | -0.411751 |
| 54 | 1  | 1.055886  | -3.774752 | 1.740673  |
| 55 | 1  | 1.221419  | -3.380835 | -2.538601 |
| 56 | 1  | 1.650099  | -4.709932 | -0.483551 |
| 57 | 6  | 4.110381  | -0.441230 | 0.282503  |
| 58 | 6  | 4.849218  | -0.900098 | -0.835584 |
| 59 | 6  | 4.681253  | -0.458488 | 1.579294  |
| 60 | 6  | 6.164172  | -1.349409 | -0.636808 |
| 61 | 6  | 5.999348  | -0.913971 | 1.732785  |
| 62 | 6  | 6.743848  | -1.355836 | 0.635275  |
| 63 | 1  | 6.732490  | -1.701709 | -1.493452 |
| 64 | 1  | 6.438701  | -0.924248 | 2.726606  |
| 65 | 1  | 7.761540  | -1.708397 | 0.770652  |
| 66 | 6  | 3.881069  | 0.004052  | 2.775806  |
| 67 | 1  | 3.623290  | 1.069632  | 2.713549  |
| 68 | 1  | 2.933330  | -0.541845 | 2.852626  |

|    |   |           |           |           |
|----|---|-----------|-----------|-----------|
| 69 | 1 | 4.443721  | -0.148874 | 3.701873  |
| 70 | 6 | 4.232491  | -0.921959 | -2.216059 |
| 71 | 1 | 3.290260  | -1.481370 | -2.216046 |
| 72 | 1 | 4.003351  | 0.086985  | -2.583869 |
| 73 | 1 | 4.912237  | -1.389043 | -2.935506 |
| 74 | 6 | -0.081770 | -1.373280 | 2.312975  |
| 75 | 1 | 0.454514  | -0.429289 | 2.464470  |
| 76 | 1 | -1.147232 | -1.152430 | 2.446371  |
| 77 | 1 | 0.218758  | -2.066383 | 3.104731  |
| 78 | 6 | 0.166605  | -0.888120 | -2.748237 |
| 79 | 1 | -0.786971 | -0.352535 | -2.759258 |
| 80 | 1 | 0.956024  | -0.128765 | -2.821098 |
| 81 | 1 | 0.224335  | -1.516045 | -3.642872 |

**21<sup>Ar</sup>** (E = -1504.1202625 a.u.)

| Center Number | Atomic Number | Coordinates (Angstroms) |           |           |
|---------------|---------------|-------------------------|-----------|-----------|
|               |               | X                       | Y         | Z         |
| 1             | 22            | -0.278638               | -0.777308 | -0.284537 |
| 2             | 7             | -1.238383               | 0.984873  | 0.126334  |
| 3             | 6             | -0.625167               | 2.159858  | -0.192191 |
| 4             | 7             | 1.668599                | 0.236078  | 0.047700  |
| 5             | 6             | -1.664457               | -2.437322 | 0.811048  |
| 6             | 6             | -0.446960               | -3.051662 | 0.374208  |
| 7             | 6             | -2.436107               | -2.113896 | -0.341492 |
| 8             | 17            | 0.280638                | -0.204680 | -2.572932 |
| 9             | 6             | -0.445979               | -3.036191 | -1.043382 |
| 10            | 6             | -1.677714               | -2.452790 | -1.487448 |
| 11            | 6             | 1.795177                | 1.512472  | -0.165926 |
| 12            | 6             | 0.708808                | 2.419002  | -0.399214 |
| 13            | 1             | -1.288725               | 3.021370  | -0.242502 |
| 14            | 6             | 1.285074                | 3.752338  | -0.662423 |
| 15            | 1             | 0.418923                | -1.147588 | 1.155533  |
| 16            | 6             | 3.082142                | 2.316022  | -0.171588 |
| 17            | 6             | 2.629975                | 3.710603  | -0.540039 |
| 18            | 1             | 3.578124                | 2.286274  | 0.806759  |
| 19            | 1             | 3.799074                | 1.899472  | -0.887826 |
| 20            | 6             | 3.634423                | 4.815684  | -0.707568 |
| 21            | 6             | 0.429151                | 4.945696  | -0.993684 |
| 22            | 1             | 1.033960                | 5.830574  | -1.209617 |
| 23            | 1             | -0.243261               | 5.197612  | -0.161794 |
| 24            | 1             | -0.201171               | 4.744296  | -1.869997 |
| 25            | 1             | 3.164984                | 5.762975  | -0.989107 |
| 26            | 1             | 4.372349                | 4.563315  | -1.482717 |
| 27            | 1             | 4.197309                | 4.983866  | 0.222225  |
| 28            | 6             | 0.553047                | -3.769274 | 1.246566  |
| 29            | 6             | -2.150746               | -2.404860 | 2.237391  |
| 30            | 6             | -3.895316               | -1.740922 | -0.334206 |
| 31            | 6             | -2.155890               | -2.424032 | -2.913300 |
| 32            | 6             | 0.587265                | -3.673869 | -1.938541 |
| 33            | 1             | 0.323367                | -4.844416 | 1.274306  |
| 34            | 1             | 0.533413                | -3.393361 | 2.273017  |
| 35            | 1             | 1.576371                | -3.657628 | 0.875087  |
| 36            | 1             | -2.627771               | -3.361698 | 2.495816  |
| 37            | 1             | -2.889549               | -1.615369 | 2.398499  |
| 38            | 1             | -1.327751               | -2.247690 | 2.941555  |
| 39            | 1             | -4.499297               | -2.660602 | -0.334729 |
| 40            | 1             | -4.181019               | -1.162357 | -1.215373 |
| 41            | 1             | -4.174111               | -1.163863 | 0.549465  |
| 42            | 1             | -2.508360               | -3.421206 | -3.215262 |
| 43            | 1             | -1.355169               | -2.123520 | -3.594224 |
| 44            | 1             | -2.985549               | -1.723692 | -3.048203 |
| 45            | 1             | 0.293055                | -4.706056 | -2.178913 |
| 46            | 1             | 1.570793                | -3.717898 | -1.459904 |
| 47            | 1             | 0.692809                | -3.126095 | -2.878919 |
| 48            | 6             | -2.605533               | 1.207935  | 0.552785  |

|    |   |           |           |           |
|----|---|-----------|-----------|-----------|
| 49 | 6 | -2.897731 | 1.235168  | 1.936486  |
| 50 | 6 | -3.608412 | 1.479875  | -0.408102 |
| 51 | 6 | -4.223134 | 1.468253  | 2.340266  |
| 52 | 6 | -4.917366 | 1.726554  | 0.039871  |
| 53 | 6 | -5.230251 | 1.709017  | 1.401182  |
| 54 | 1 | -4.455312 | 1.482375  | 3.401221  |
| 55 | 1 | -5.693865 | 1.927257  | -0.692735 |
| 56 | 1 | -6.248445 | 1.893010  | 1.729198  |
| 57 | 6 | 2.831280  | -0.475809 | 0.549538  |
| 58 | 6 | 3.060299  | -0.483607 | 1.949871  |
| 59 | 6 | 3.713953  | -1.146560 | -0.330605 |
| 60 | 6 | 4.150726  | -1.210137 | 2.452815  |
| 61 | 6 | 4.792704  | -1.862050 | 0.221180  |
| 62 | 6 | 5.009887  | -1.905732 | 1.598831  |
| 63 | 1 | 4.323511  | -1.221324 | 3.524977  |
| 64 | 1 | 5.470737  | -2.379863 | -0.450840 |
| 65 | 1 | 5.847030  | -2.466168 | 2.002823  |
| 66 | 6 | -3.295648 | 1.520164  | -1.887749 |
| 67 | 1 | -2.788368 | 2.452729  | -2.169302 |
| 68 | 1 | -2.626706 | 0.708537  | -2.187661 |
| 69 | 1 | -4.215829 | 1.458632  | -2.477110 |
| 70 | 6 | -1.804042 | 1.089111  | 2.970724  |
| 71 | 1 | -1.182916 | 0.208156  | 2.790501  |
| 72 | 1 | -1.129373 | 1.955163  | 2.953706  |
| 73 | 1 | -2.230251 | 1.015670  | 3.975975  |
| 74 | 6 | 2.169873  | 0.279609  | 2.903257  |
| 75 | 1 | 2.178425  | 1.358071  | 2.700445  |
| 76 | 1 | 1.129161  | -0.049237 | 2.817066  |
| 77 | 1 | 2.499272  | 0.131923  | 3.936085  |
| 78 | 6 | 3.574322  | -1.077252 | -1.834627 |
| 79 | 1 | 2.570742  | -1.334852 | -2.177012 |
| 80 | 1 | 3.766437  | -0.063471 | -2.209917 |
| 81 | 1 | 4.294721  | -1.748032 | -2.312755 |

**TS21<sup>Ar</sup>-13<sup>Ar</sup>** (E = -1504.1007006 a.u.)

| Center Number | Atomic Number | Coordinates (Angstroms) |           |           |
|---------------|---------------|-------------------------|-----------|-----------|
|               |               | X                       | Y         | Z         |
| 1             | 22            | -0.872134               | 0.047758  | -0.182025 |
| 2             | 7             | 0.384077                | 1.355800  | 0.978612  |
| 3             | 6             | 1.315567                | 0.815600  | 1.757048  |
| 4             | 7             | 0.768874                | -1.341623 | -0.361824 |
| 5             | 6             | -3.069102               | -0.003902 | 0.895759  |
| 6             | 6             | -2.870611               | -1.296253 | 0.306096  |
| 7             | 6             | -3.113168               | 0.953257  | -0.147133 |
| 8             | 17            | -0.177501               | 1.358904  | -2.103351 |
| 9             | 6             | -2.801119               | -1.130281 | -1.099440 |
| 10            | 6             | -2.938221               | 0.260253  | -1.383761 |
| 11            | 6             | 1.619616                | -1.425226 | 0.654322  |
| 12            | 6             | 1.796739                | -0.495808 | 1.714970  |
| 13            | 1             | 1.820531                | 1.489800  | 2.450612  |
| 14            | 6             | 2.854644                | -1.011922 | 2.610945  |
| 15            | 1             | -0.726540               | -0.612957 | 1.327616  |
| 16            | 6             | 2.647152                | -2.528779 | 0.842637  |
| 17            | 6             | 3.346877                | -2.173505 | 2.130534  |
| 18            | 1             | 2.163157                | -3.509966 | 0.884022  |
| 19            | 1             | 3.340367                | -2.571289 | -0.006491 |
| 20            | 6             | 4.429803                | -3.055906 | 2.686219  |
| 21            | 6             | 3.281499                | -0.279872 | 3.856628  |
| 22            | 1             | 4.005610                | -0.859202 | 4.436284  |
| 23            | 1             | 2.419967                | -0.068775 | 4.504188  |
| 24            | 1             | 3.748166                | 0.685239  | 3.615458  |
| 25            | 1             | 4.824151                | -2.677076 | 3.634132  |
| 26            | 1             | 5.272821                | -3.139933 | 1.984892  |
| 27            | 1             | 4.060947                | -4.077039 | 2.861035  |
| 28            | 6             | -3.024674               | -2.575990 | 1.086680  |

|    |   |           |           |           |
|----|---|-----------|-----------|-----------|
| 29 | 6 | -3.455430 | 0.181584  | 2.340269  |
| 30 | 6 | -3.401856 | 2.428965  | -0.028410 |
| 31 | 6 | -3.177125 | 0.839047  | -2.751413 |
| 32 | 6 | -2.745222 | -2.204267 | -2.157523 |
| 33 | 1 | -4.031260 | -2.613042 | 1.526825  |
| 34 | 1 | -2.305963 | -2.647849 | 1.910190  |
| 35 | 1 | -2.912224 | -3.458291 | 0.455026  |
| 36 | 1 | -4.412254 | -0.327548 | 2.525424  |
| 37 | 1 | -3.591004 | 1.233296  | 2.597118  |
| 38 | 1 | -2.718113 | -0.249246 | 3.025838  |
| 39 | 1 | -4.416737 | 2.646235  | -0.389766 |
| 40 | 1 | -2.704197 | 3.025593  | -0.625312 |
| 41 | 1 | -3.334767 | 2.774443  | 1.005662  |
| 42 | 1 | -4.237278 | 0.713643  | -3.019988 |
| 43 | 1 | -2.570903 | 0.345001  | -3.514918 |
| 44 | 1 | -2.938546 | 1.904058  | -2.786446 |
| 45 | 1 | -3.692775 | -2.228283 | -2.713353 |
| 46 | 1 | -2.588174 | -3.194190 | -1.725020 |
| 47 | 1 | -1.945678 | -2.027160 | -2.884758 |
| 48 | 6 | 0.355105  | 2.809682  | 1.016146  |
| 49 | 6 | -0.490179 | 3.465971  | 1.944983  |
| 50 | 6 | 1.206583  | 3.565779  | 0.172666  |
| 51 | 6 | -0.581120 | 4.866676  | 1.914952  |
| 52 | 6 | 1.082552  | 4.965852  | 0.173993  |
| 53 | 6 | 0.179295  | 5.616365  | 1.015541  |
| 54 | 1 | -1.241241 | 5.366130  | 2.618904  |
| 55 | 1 | 1.719421  | 5.545760  | -0.488350 |
| 56 | 1 | 0.092114  | 6.698215  | 0.993484  |
| 57 | 6 | 1.014677  | -2.252733 | -1.472024 |
| 58 | 6 | 0.449867  | -3.550083 | -1.475912 |
| 59 | 6 | 1.871760  | -1.845253 | -2.529450 |
| 60 | 6 | 0.644821  | -4.375993 | -2.597389 |
| 61 | 6 | 2.039569  | -2.702683 | -3.627954 |
| 62 | 6 | 1.413906  | -3.951257 | -3.679704 |
| 63 | 1 | 0.196426  | -5.365807 | -2.603204 |
| 64 | 1 | 2.683434  | -2.385510 | -4.442773 |
| 65 | 1 | 1.549833  | -4.595786 | -4.542398 |
| 66 | 6 | -1.202280 | 2.706772  | 3.041194  |
| 67 | 1 | -2.176185 | 3.153021  | 3.270179  |
| 68 | 1 | -1.342131 | 1.657917  | 2.786157  |
| 69 | 1 | -0.612214 | 2.736166  | 3.968750  |
| 70 | 6 | 2.304797  | 2.943140  | -0.661866 |
| 71 | 1 | 2.244590  | 1.857623  | -0.675365 |
| 72 | 1 | 2.256560  | 3.289785  | -1.698919 |
| 73 | 1 | 3.286977  | 3.231519  | -0.260831 |
| 74 | 6 | -0.276020 | -4.121315 | -0.278919 |
| 75 | 1 | 0.362879  | -4.845374 | 0.245803  |
| 76 | 1 | -0.555695 | -3.350213 | 0.437479  |
| 77 | 1 | -1.177562 | -4.665031 | -0.580879 |
| 78 | 6 | 2.658863  | -0.557368 | -2.472573 |
| 79 | 1 | 2.000006  | 0.313198  | -2.443882 |
| 80 | 1 | 3.293705  | -0.515527 | -1.577722 |
| 81 | 1 | 3.311358  | -0.473794 | -3.347159 |

$^{13}\text{Ar}$  (E = -1504.1014371 a.u.)

| Center Number | Atomic Number | Coordinates (Angstroms) |           |           |
|---------------|---------------|-------------------------|-----------|-----------|
|               |               | X                       | Y         | Z         |
| 1             | 22            | -0.881298               | 0.093134  | -0.128938 |
| 2             | 7             | 0.447413                | 1.410981  | 1.044344  |
| 3             | 6             | 1.382780                | 0.850284  | 1.786451  |
| 4             | 7             | 0.716216                | -1.282380 | -0.335101 |
| 5             | 6             | -3.129901               | -0.030174 | 0.820685  |
| 6             | 6             | -2.836314               | -1.338123 | 0.310472  |
| 7             | 6             | -3.164881               | 0.870477  | -0.270260 |
| 8             | 17            | -0.349938               | 1.762898  | -1.828386 |

|    |   |           |           |           |
|----|---|-----------|-----------|-----------|
| 9  | 6 | -2.716757 | -1.241183 | -1.098897 |
| 10 | 6 | -2.894201 | 0.123272  | -1.460811 |
| 11 | 6 | 1.597727  | -1.389268 | 0.668079  |
| 12 | 6 | 1.829529  | -0.477862 | 1.721932  |
| 13 | 1 | 1.929619  | 1.504300  | 2.467356  |
| 14 | 6 | 2.911138  | -1.013035 | 2.578773  |
| 15 | 1 | -0.822156 | -0.417890 | 1.443113  |
| 16 | 6 | 2.617120  | -2.508245 | 0.809931  |
| 17 | 6 | 3.372563  | -2.174654 | 2.070750  |
| 18 | 1 | 2.135122  | -3.487560 | 0.864084  |
| 19 | 1 | 3.273462  | -2.543919 | -0.069000 |
| 20 | 6 | 4.464465  | -3.075512 | 2.577497  |
| 21 | 6 | 3.387664  | -0.297193 | 3.816022  |
| 22 | 1 | 4.119946  | -0.893087 | 4.368060  |
| 23 | 1 | 2.550355  | -0.078223 | 4.492064  |
| 24 | 1 | 3.862447  | 0.662511  | 3.569241  |
| 25 | 1 | 4.898283  | -2.709124 | 3.513036  |
| 26 | 1 | 5.280055  | -3.163156 | 1.844916  |
| 27 | 1 | 4.090553  | -4.093744 | 2.758234  |
| 28 | 6 | -2.954035 | -2.580934 | 1.154242  |
| 29 | 6 | -3.598270 | 0.212519  | 2.232605  |
| 30 | 6 | -3.533478 | 2.332226  | -0.236060 |
| 31 | 6 | -3.079232 | 0.613033  | -2.871786 |
| 32 | 6 | -2.622453 | -2.364090 | -2.100955 |
| 33 | 1 | -3.960225 | -2.629993 | 1.593594  |
| 34 | 1 | -2.236986 | -2.588107 | 1.982768  |
| 35 | 1 | -2.808754 | -3.489238 | 0.568024  |
| 36 | 1 | -4.553847 | -0.308434 | 2.389670  |
| 37 | 1 | -3.768396 | 1.271945  | 2.432147  |
| 38 | 1 | -2.890661 | -0.168963 | 2.976033  |
| 39 | 1 | -4.559648 | 2.474094  | -0.603496 |
| 40 | 1 | -2.864653 | 2.923039  | -0.869279 |
| 41 | 1 | -3.483612 | 2.740725  | 0.776725  |
| 42 | 1 | -4.096870 | 0.368464  | -3.212858 |
| 43 | 1 | -2.371546 | 0.146362  | -3.563266 |
| 44 | 1 | -2.942544 | 1.693167  | -2.944367 |
| 45 | 1 | -3.564477 | -2.430983 | -2.663184 |
| 46 | 1 | -2.453731 | -3.328791 | -1.620176 |
| 47 | 1 | -1.819664 | -2.209563 | -2.828681 |
| 48 | 6 | 0.453107  | 2.863652  | 1.108180  |
| 49 | 6 | -0.472730 | 3.532313  | 1.939462  |
| 50 | 6 | 1.426709  | 3.598064  | 0.383176  |
| 51 | 6 | -0.491643 | 4.938135  | 1.946635  |
| 52 | 6 | 1.376286  | 4.999854  | 0.422874  |
| 53 | 6 | 0.412339  | 5.671968  | 1.179631  |
| 54 | 1 | -1.213879 | 5.450363  | 2.576572  |
| 55 | 1 | 2.107259  | 5.565158  | -0.147744 |
| 56 | 1 | 0.382777  | 6.757111  | 1.186986  |
| 57 | 6 | 0.910909  | -2.204067 | -1.446971 |
| 58 | 6 | 0.446236  | -3.540391 | -1.382548 |
| 59 | 6 | 1.629416  | -1.754345 | -2.587436 |
| 60 | 6 | 0.617818  | -4.375449 | -2.500998 |
| 61 | 6 | 1.772218  | -2.621254 | -3.682418 |
| 62 | 6 | 1.256763  | -3.919417 | -3.653190 |
| 63 | 1 | 0.248236  | -5.396189 | -2.452627 |
| 64 | 1 | 2.312233  | -2.271798 | -4.557193 |
| 65 | 1 | 1.374562  | -4.574587 | -4.510450 |
| 66 | 6 | -1.364123 | 2.777827  | 2.897908  |
| 67 | 1 | -2.339324 | 3.265470  | 3.004453  |
| 68 | 1 | -1.513594 | 1.745941  | 2.584549  |
| 69 | 1 | -0.910529 | 2.745392  | 3.899253  |
| 70 | 6 | 2.533012  | 2.916001  | -0.389434 |
| 71 | 1 | 2.131227  | 2.155731  | -1.060871 |
| 72 | 1 | 3.088526  | 3.647445  | -0.984554 |

|    |   |           |           |           |
|----|---|-----------|-----------|-----------|
| 73 | 1 | 3.249720  | 2.422749  | 0.281159  |
| 74 | 6 | -0.176335 | -4.138134 | -0.140070 |
| 75 | 1 | 0.507204  | -4.861872 | 0.324189  |
| 76 | 1 | -0.418338 | -3.382014 | 0.605763  |
| 77 | 1 | -1.090078 | -4.691148 | -0.383244 |
| 78 | 6 | 2.299742  | -0.401762 | -2.624766 |
| 79 | 1 | 1.573050  | 0.414177  | -2.586338 |
| 80 | 1 | 2.973691  | -0.268203 | -1.769227 |
| 81 | 1 | 2.892052  | -0.297617 | -3.538959 |

TS13<sup>Ar</sup>-14<sup>Ar</sup> (E = -1504.0819784 a.u.)

| Center Number | Atomic Number | Coordinates (Angstroms) |           |           |
|---------------|---------------|-------------------------|-----------|-----------|
|               |               | X                       | Y         | Z         |
| 1             | 22            | -1.409364               | -0.345692 | -0.343165 |
| 2             | 7             | -0.397690               | 0.776404  | 0.860167  |
| 3             | 6             | 0.149813                | -0.137705 | 1.782873  |
| 4             | 7             | 0.327683                | -1.653024 | -0.700447 |
| 5             | 6             | -3.619340               | -0.496868 | 0.575613  |
| 6             | 6             | -3.272461               | -1.828108 | 0.170271  |
| 7             | 6             | -3.734714               | 0.300049  | -0.593438 |
| 8             | 17            | -0.896775               | 1.236723  | -2.117210 |
| 9             | 6             | -3.177480               | -1.844193 | -1.249395 |
| 10            | 6             | -3.450459               | -0.531628 | -1.718022 |
| 11            | 6             | 1.300704                | -1.624908 | 0.196584  |
| 12            | 6             | 1.201253                | -0.987519 | 1.461474  |
| 13            | 1             | -0.036809               | 0.073242  | 2.840208  |
| 14            | 6             | 2.254326                | -1.525645 | 2.335830  |
| 15            | 1             | -1.103095               | -1.308402 | 1.065505  |
| 16            | 6             | 2.583970                | -2.433281 | 0.190511  |
| 17            | 6             | 3.079446                | -2.321780 | 1.616194  |
| 18            | 1             | 2.430168                | -3.467557 | -0.124775 |
| 19            | 1             | 3.301596                | -2.003626 | -0.522102 |
| 20            | 6             | 4.349333                | -3.002927 | 2.042504  |
| 21            | 6             | 2.366637                | -1.139052 | 3.786725  |
| 22            | 1             | 3.243985                | -1.588106 | 4.260413  |
| 23            | 1             | 1.481194                | -1.461698 | 4.351125  |
| 24            | 1             | 2.439634                | -0.048831 | 3.897581  |
| 25            | 1             | 4.589609                | -2.807089 | 3.091864  |
| 26            | 1             | 5.201894                | -2.666234 | 1.435014  |
| 27            | 1             | 4.279492                | -4.092503 | 1.912684  |
| 28            | 6             | -3.367706               | -3.022242 | 1.087155  |
| 29            | 6             | -4.048879               | -0.159962 | 1.981902  |
| 30            | 6             | -4.183537               | 1.736188  | -0.691317 |
| 31            | 6             | -3.623544               | -0.141432 | -3.160707 |
| 32            | 6             | -3.030485               | -3.052088 | -2.140989 |
| 33            | 1             | -4.420659               | -3.191833 | 1.356232  |
| 34            | 1             | -2.809081               | -2.875330 | 2.016874  |
| 35            | 1             | -3.001644               | -3.934567 | 0.612669  |
| 36            | 1             | -4.930126               | -0.760166 | 2.249362  |
| 37            | 1             | -4.325271               | 0.890679  | 2.086113  |
| 38            | 1             | -3.270557               | -0.380298 | 2.720655  |
| 39            | 1             | -5.135870               | 1.797094  | -1.235620 |
| 40            | 1             | -3.452880               | 2.347437  | -1.231838 |
| 41            | 1             | -4.339372               | 2.183280  | 0.294135  |
| 42            | 1             | -4.659852               | -0.336065 | -3.476014 |
| 43            | 1             | -2.962005               | -0.712929 | -3.818780 |
| 44            | 1             | -3.409537               | 0.917757  | -3.317927 |
| 45            | 1             | -4.001554               | -3.302775 | -2.591588 |
| 46            | 1             | -2.686112               | -3.928312 | -1.588855 |
| 47            | 1             | -2.324613               | -2.880939 | -2.959731 |
| 48            | 6             | 0.035975                | 2.144064  | 1.065191  |
| 49            | 6             | -0.722354               | 3.010535  | 1.890868  |
| 50            | 6             | 1.247262                | 2.601725  | 0.482933  |
| 51            | 6             | -0.283700               | 4.329472  | 2.091335  |
| 52            | 6             | 1.643516                | 3.931595  | 0.704200  |

|    |   |           |           |           |
|----|---|-----------|-----------|-----------|
| 53 | 6 | 0.888901  | 4.796050  | 1.497316  |
| 54 | 1 | -0.873621 | 4.987568  | 2.722859  |
| 55 | 1 | 2.562517  | 4.282837  | 0.243983  |
| 56 | 1 | 1.214318  | 5.819470  | 1.655638  |
| 57 | 6 | 0.485778  | -2.642944 | -1.756628 |
| 58 | 6 | 0.138768  | -3.988697 | -1.474291 |
| 59 | 6 | 1.015502  | -2.287953 | -3.021411 |
| 60 | 6 | 0.240275  | -4.945525 | -2.497226 |
| 61 | 6 | 1.095509  | -3.279094 | -4.015525 |
| 62 | 6 | 0.698367  | -4.594823 | -3.767950 |
| 63 | 1 | -0.038772 | -5.973520 | -2.283883 |
| 64 | 1 | 1.492504  | -3.007187 | -4.988935 |
| 65 | 1 | 0.765253  | -5.342590 | -4.551775 |
| 66 | 6 | -1.996637 | 2.555279  | 2.558396  |
| 67 | 1 | -2.798363 | 2.425452  | 1.826030  |
| 68 | 1 | -1.876226 | 1.596625  | 3.072604  |
| 69 | 1 | -2.330638 | 3.294567  | 3.293089  |
| 70 | 6 | 2.133267  | 1.711741  | -0.355981 |
| 71 | 1 | 1.543443  | 1.133369  | -1.067568 |
| 72 | 1 | 2.857600  | 2.315400  | -0.912609 |
| 73 | 1 | 2.695663  | 1.005220  | 0.267431  |
| 74 | 6 | -0.273142 | -4.436757 | -0.088822 |
| 75 | 1 | 0.600783  | -4.750906 | 0.499816  |
| 76 | 1 | -0.763710 | -3.640511 | 0.471753  |
| 77 | 1 | -0.945620 | -5.299366 | -0.142003 |
| 78 | 6 | 1.564160  | -0.910934 | -3.309495 |
| 79 | 1 | 0.808332  | -0.131686 | -3.186830 |
| 80 | 1 | 2.388627  | -0.662711 | -2.628716 |
| 81 | 1 | 1.952516  | -0.863793 | -4.331381 |

**14<sup>Ar</sup>** (E = -1504.1338969 a.u.)

| Center Number | Atomic Number | Coordinates (Angstroms) |           |           |
|---------------|---------------|-------------------------|-----------|-----------|
|               |               | X                       | Y         | Z         |
| 1             | 22            | 0.020726                | -0.989919 | -0.062485 |
| 2             | 7             | -1.625321               | -0.146680 | 0.350938  |
| 3             | 6             | -1.354243               | 0.804917  | 1.470438  |
| 4             | 7             | 1.082285                | 0.734356  | -0.130487 |
| 5             | 6             | 0.094002                | -2.654502 | 1.640654  |
| 6             | 6             | 1.408998                | -2.090276 | 1.610247  |
| 7             | 6             | -0.099610               | -3.365304 | 0.424501  |
| 8             | 17            | -0.610010               | -1.488871 | -2.255678 |
| 9             | 6             | 2.031866                | -2.475751 | 0.388092  |
| 10            | 6             | 1.100337                | -3.251258 | -0.343420 |
| 11            | 6             | 0.438939                | 1.931513  | 0.206505  |
| 12            | 6             | -0.690167               | 2.040463  | 0.951071  |
| 13            | 1             | -2.274847               | 1.009581  | 2.021786  |
| 14            | 6             | -1.096178               | 3.448861  | 1.048411  |
| 15            | 1             | -0.671702               | 0.313569  | 2.184225  |
| 16            | 6             | 0.839584                | 3.316842  | -0.254609 |
| 17            | 6             | -0.215206               | 4.213804  | 0.355816  |
| 18            | 1             | 1.850773                | 3.606625  | 0.046656  |
| 19            | 1             | 0.824136                | 3.367439  | -1.351691 |
| 20            | 6             | -0.186017               | 5.706315  | 0.170316  |
| 21            | 6             | -2.311249               | 3.894611  | 1.820908  |
| 22            | 1             | -2.447001               | 4.979141  | 1.773124  |
| 23            | 1             | -2.234097               | 3.613776  | 2.880513  |
| 24            | 1             | -3.223446               | 3.424783  | 1.428989  |
| 25            | 1             | -1.028700               | 6.194985  | 0.670445  |
| 26            | 1             | -0.227754               | 5.981094  | -0.893638 |
| 27            | 1             | 0.738674                | 6.144474  | 0.574056  |
| 28            | 6             | 2.106833                | -1.526531 | 2.821095  |
| 29            | 6             | -0.760673               | -2.707296 | 2.884212  |
| 30            | 6             | -1.281222               | -4.212431 | 0.025066  |
| 31            | 6             | 1.374069                | -3.981518 | -1.629578 |
| 32            | 6             | 3.482225                | -2.286475 | 0.021996  |



|    |   |           |           |           |
|----|---|-----------|-----------|-----------|
| 33 | 1 | 2.415443  | -2.352847 | 3.479101  |
| 34 | 1 | 1.458864  | -0.871059 | 3.411651  |
| 35 | 1 | 3.004239  | -0.967199 | 2.552601  |
| 36 | 1 | -0.239181 | -3.281465 | 3.663019  |
| 37 | 1 | -1.717274 | -3.198185 | 2.698612  |
| 38 | 1 | -0.971524 | -1.716559 | 3.301614  |
| 39 | 1 | -0.977992 | -5.264308 | -0.067676 |
| 40 | 1 | -1.691643 | -3.900526 | -0.941820 |
| 41 | 1 | -2.084984 | -4.166138 | 0.764302  |
| 42 | 1 | 1.715015  | -5.004785 | -1.412944 |
| 43 | 1 | 2.154192  | -3.490137 | -2.218816 |
| 44 | 1 | 0.478227  | -4.047097 | -2.252260 |
| 45 | 1 | 4.058659  | -3.177404 | 0.311137  |
| 46 | 1 | 3.925473  | -1.424675 | 0.524550  |
| 47 | 1 | 3.618497  | -2.144253 | -1.053825 |
| 48 | 6 | 2.501499  | 0.913838  | -0.364334 |
| 49 | 6 | 3.345486  | 1.332510  | 0.703683  |
| 50 | 6 | 3.047429  | 0.726435  | -1.659998 |
| 51 | 6 | 4.724430  | 1.463706  | 0.473933  |
| 52 | 6 | 4.432959  | 0.881237  | -1.845501 |
| 53 | 6 | 5.274340  | 1.229375  | -0.788702 |
| 54 | 1 | 5.366239  | 1.765778  | 1.297023  |
| 55 | 1 | 4.844407  | 0.738285  | -2.840585 |
| 56 | 1 | 6.342069  | 1.338689  | -0.950422 |
| 57 | 6 | -2.937484 | -0.006667 | -0.232706 |
| 58 | 6 | -4.034790 | -0.673744 | 0.376078  |
| 59 | 6 | -3.157556 | 0.819724  | -1.367343 |
| 60 | 6 | -5.319996 | -0.531130 | -0.168074 |
| 61 | 6 | -4.462655 | 0.923301  | -1.882833 |
| 62 | 6 | -5.538632 | 0.258150  | -1.298074 |
| 63 | 1 | -6.149938 | -1.050080 | 0.302842  |
| 64 | 1 | -4.624435 | 1.545928  | -2.758171 |
| 65 | 1 | -6.536113 | 0.355434  | -1.715086 |
| 66 | 6 | -3.853831 | -1.552285 | 1.591217  |
| 67 | 1 | -3.292258 | -2.457499 | 1.341842  |
| 68 | 1 | -3.305427 | -1.048631 | 2.394120  |
| 69 | 1 | -4.825842 | -1.859898 | 1.988820  |
| 70 | 6 | -2.073062 | 1.633256  | -2.038829 |
| 71 | 1 | -1.098806 | 1.155097  | -1.964777 |
| 72 | 1 | -2.308438 | 1.767808  | -3.100266 |
| 73 | 1 | -1.993819 | 2.630283  | -1.585981 |
| 74 | 6 | 2.185945  | 0.411867  | -2.860767 |
| 75 | 1 | 1.892809  | -0.642457 | -2.903341 |
| 76 | 1 | 1.253918  | 0.983455  | -2.849018 |
| 77 | 1 | 2.726325  | 0.646349  | -3.783577 |
| 78 | 6 | 2.809072  | 1.703707  | 2.071128  |
| 79 | 1 | 3.564484  | 1.524102  | 2.843561  |
| 80 | 1 | 2.547749  | 2.769699  | 2.115408  |
| 81 | 1 | 1.907837  | 1.148539  | 2.328347  |

TS14<sup>Ar</sup>-15<sup>Ar</sup> (E = -1504.1080366 a.u.)

| Center Number | Atomic Number | Coordinates (Angstroms) |           |           |
|---------------|---------------|-------------------------|-----------|-----------|
|               |               | X                       | Y         | Z         |
| 1             | 22            | 0.481938                | -0.378405 | -0.027814 |
| 2             | 7             | 0.505372                | -0.505931 | 1.740608  |
| 3             | 6             | -0.218825               | 1.460336  | 1.768782  |
| 4             | 7             | -1.591839               | 0.295540  | -0.440715 |
| 5             | 6             | 2.534522                | 0.794876  | -0.459631 |
| 6             | 6             | 1.636101                | 1.350530  | -1.421399 |
| 7             | 6             | 2.752962                | -0.569669 | -0.800928 |
| 8             | 17            | 0.263550                | -2.727755 | -0.287180 |
| 9             | 6             | 1.319111                | 0.336741  | -2.370703 |
| 10            | 6             | 2.010239                | -0.839139 | -1.991927 |
| 11            | 6             | -2.234462               | 0.925787  | 0.540849  |
| 12            | 6             | -1.608164               | 1.397496  | 1.709368  |

|    |   |           |           |           |
|----|---|-----------|-----------|-----------|
| 13 | 1 | 0.295705  | 1.745828  | 2.676474  |
| 14 | 6 | -2.640467 | 1.678209  | 2.716906  |
| 15 | 1 | 0.297160  | 1.784277  | 0.866603  |
| 16 | 6 | -3.730058 | 1.101293  | 0.708212  |
| 17 | 6 | -3.865024 | 1.534964  | 2.155632  |
| 18 | 1 | -4.136295 | 1.854812  | 0.023105  |
| 19 | 1 | -4.264791 | 0.170664  | 0.488064  |
| 20 | 6 | -5.218618 | 1.788597  | 2.757248  |
| 21 | 6 | -2.297706 | 2.109732  | 4.117116  |
| 22 | 1 | -3.192068 | 2.296079  | 4.718164  |
| 23 | 1 | -1.698619 | 3.031030  | 4.108195  |
| 24 | 1 | -1.701876 | 1.341855  | 4.627543  |
| 25 | 1 | -5.150085 | 2.101931  | 3.803477  |
| 26 | 1 | -5.846436 | 0.886848  | 2.718852  |
| 27 | 1 | -5.758285 | 2.573459  | 2.207140  |
| 28 | 6 | 1.378108  | 2.832922  | -1.552145 |
| 29 | 6 | 3.328589  | 1.637366  | 0.507373  |
| 30 | 6 | 3.728314  | -1.531148 | -0.168205 |
| 31 | 6 | 2.095554  | -2.096204 | -2.813110 |
| 32 | 6 | 0.542992  | 0.492800  | -3.654221 |
| 33 | 1 | 2.329478  | 3.355935  | -1.725618 |
| 34 | 1 | 0.933713  | 3.280477  | -0.654264 |
| 35 | 1 | 0.722741  | 3.056963  | -2.395654 |
| 36 | 1 | 3.995092  | 2.306862  | -0.055923 |
| 37 | 1 | 3.953307  | 1.028074  | 1.161316  |
| 38 | 1 | 2.698477  | 2.272741  | 1.140108  |
| 39 | 1 | 4.594343  | -1.687749 | -0.826956 |
| 40 | 1 | 3.266321  | -2.507260 | 0.013540  |
| 41 | 1 | 4.104048  | -1.157852 | 0.788027  |
| 42 | 1 | 2.898841  | -1.997559 | -3.559018 |
| 43 | 1 | 1.163454  | -2.295939 | -3.350429 |
| 44 | 1 | 2.312405  | -2.968491 | -2.192638 |
| 45 | 1 | 1.226780  | 0.467388  | -4.514651 |
| 46 | 1 | -0.001438 | 1.438369  | -3.690751 |
| 47 | 1 | -0.188093 | -0.310312 | -3.794319 |
| 48 | 6 | 0.490926  | -1.029182 | 3.036912  |
| 49 | 6 | -0.621742 | -1.808218 | 3.486683  |
| 50 | 6 | 1.572052  | -0.785722 | 3.937457  |
| 51 | 6 | -0.614351 | -2.318598 | 4.793604  |
| 52 | 6 | 1.529373  | -1.314032 | 5.235029  |
| 53 | 6 | 0.445397  | -2.078326 | 5.670270  |
| 54 | 1 | -1.459864 | -2.916768 | 5.120988  |
| 55 | 1 | 2.362610  | -1.122429 | 5.905208  |
| 56 | 1 | 0.427522  | -2.483170 | 6.677183  |
| 57 | 6 | -2.362540 | 0.166681  | -1.670502 |
| 58 | 6 | -2.960016 | -1.066441 | -2.037109 |
| 59 | 6 | -2.563190 | 1.318222  | -2.478346 |
| 60 | 6 | -3.645593 | -1.146253 | -3.262385 |
| 61 | 6 | -3.251660 | 1.189517  | -3.695033 |
| 62 | 6 | -3.774857 | -0.038819 | -4.101017 |
| 63 | 1 | -4.099039 | -2.092689 | -3.541892 |
| 64 | 1 | -3.383480 | 2.069370  | -4.318626 |
| 65 | 1 | -4.302256 | -0.125354 | -5.045676 |
| 66 | 6 | -2.116392 | 2.700727  | -2.053323 |
| 67 | 1 | -2.935310 | 3.240467  | -1.557270 |
| 68 | 1 | -1.282976 | 2.672773  | -1.353895 |
| 69 | 1 | -1.822763 | 3.299802  | -2.922079 |
| 70 | 6 | -2.961714 | -2.276976 | -1.134675 |
| 71 | 1 | -2.043198 | -2.862155 | -1.231582 |
| 72 | 1 | -3.036925 | -1.996365 | -0.080900 |
| 73 | 1 | -3.809781 | -2.924577 | -1.379868 |
| 74 | 6 | 2.772649  | 0.021071  | 3.516273  |
| 75 | 1 | 3.295882  | -0.458462 | 2.683174  |
| 76 | 1 | 2.495835  | 1.025634  | 3.179663  |

|    |   |           |           |          |
|----|---|-----------|-----------|----------|
| 77 | 1 | 3.478565  | 0.125591  | 4.345888 |
| 78 | 6 | -1.806199 | -2.110645 | 2.598818 |
| 79 | 1 | -2.393140 | -1.209728 | 2.391078 |
| 80 | 1 | -1.485180 | -2.526630 | 1.641540 |
| 81 | 1 | -2.468647 | -2.832374 | 3.088143 |

$15^{\text{Ar}}$  (E = -1504.123483 a.u.)

| Center Number | Atomic Number | Coordinates (Angstroms) |           |           |
|---------------|---------------|-------------------------|-----------|-----------|
|               |               | X                       | Y         | Z         |
| 1             | 22            | -0.071420               | -1.233694 | 0.224341  |
| 2             | 7             | 1.588072                | -0.810642 | 0.350292  |
| 3             | 6             | 1.457103                | 1.023498  | -2.082662 |
| 4             | 7             | -0.978676               | 1.021792  | -0.154229 |
| 5             | 6             | -0.042362               | -2.864643 | -1.554862 |
| 6             | 6             | -1.263173               | -2.172191 | -1.788427 |
| 7             | 6             | -0.158520               | -3.550819 | -0.309440 |
| 8             | 17            | -0.512750               | -1.539189 | 2.528325  |
| 9             | 6             | -2.151885               | -2.456607 | -0.707333 |
| 10            | 6             | -1.478584               | -3.320351 | 0.188297  |
| 11            | 6             | -0.334557               | 2.035518  | -0.628856 |
| 12            | 6             | 0.949440                | 2.038517  | -1.369558 |
| 13            | 1             | 2.383173                | 1.134773  | -2.633726 |
| 14            | 6             | 1.465531                | 3.419514  | -1.318228 |
| 15            | 1             | 0.973991                | 0.059995  | -2.132630 |
| 16            | 6             | -0.737411               | 3.495113  | -0.472969 |
| 17            | 6             | 0.526247                | 4.248916  | -0.818022 |
| 18            | 1             | -1.551947               | 3.748695  | -1.163333 |
| 19            | 1             | -1.111695               | 3.709970  | 0.531104  |
| 20            | 6             | 0.588994                | 5.735181  | -0.619543 |
| 21            | 6             | 2.837470                | 3.763799  | -1.827952 |
| 22            | 1             | 3.084530                | 4.814599  | -1.656136 |
| 23            | 1             | 2.915141                | 3.572696  | -2.907128 |
| 24            | 1             | 3.599461                | 3.147938  | -1.334278 |
| 25            | 1             | 1.559623                | 6.152095  | -0.900942 |
| 26            | 1             | 0.398745                | 5.995219  | 0.431161  |
| 27            | 1             | -0.184057               | 6.241380  | -1.215111 |
| 28            | 6             | -1.614440               | -1.557535 | -3.123150 |
| 29            | 6             | 0.982812                | -3.110678 | -2.633464 |
| 30            | 6             | 0.824757                | -4.529521 | 0.286510  |
| 31            | 6             | -2.111177               | -4.013092 | 1.364713  |
| 32            | 6             | -3.602390               | -2.060995 | -0.579936 |
| 33            | 1             | -1.537109               | -2.322684 | -3.909067 |
| 34            | 1             | -0.946490               | -0.738029 | -3.414183 |
| 35            | 1             | -2.637885               | -1.178953 | -3.137800 |
| 36            | 1             | 0.538020                | -3.746267 | -3.414278 |
| 37            | 1             | 1.862274                | -3.630646 | -2.252670 |
| 38            | 1             | 1.319778                | -2.190836 | -3.123515 |
| 39            | 1             | 0.518437                | -5.564275 | 0.074303  |
| 40            | 1             | 0.891960                | -4.420010 | 1.374069  |
| 41            | 1             | 1.830150                | -4.390599 | -0.119449 |
| 42            | 1             | -2.624830               | -4.925202 | 1.024349  |
| 43            | 1             | -2.848645               | -3.377396 | 1.863338  |
| 44            | 1             | -1.368659               | -4.302133 | 2.112354  |
| 45            | 1             | -4.250360               | -2.941015 | -0.698968 |
| 46            | 1             | -3.893538               | -1.331143 | -1.338472 |
| 47            | 1             | -3.824942               | -1.623328 | 0.399668  |
| 48            | 6             | 2.898153                | -0.444356 | 0.642921  |
| 49            | 6             | 3.149852                | 0.532542  | 1.658487  |
| 50            | 6             | 4.014475                | -1.002571 | -0.051523 |
| 51            | 6             | 4.466912                | 0.915794  | 1.944988  |
| 52            | 6             | 5.315423                | -0.589262 | 0.270553  |
| 53            | 6             | 5.553609                | 0.365165  | 1.261182  |
| 54            | 1             | 4.635292                | 1.656060  | 2.722571  |
| 55            | 1             | 6.149664                | -1.030864 | -0.268038 |

|    |   |           |           |           |
|----|---|-----------|-----------|-----------|
| 56 | 1 | 6.567432  | 0.671632  | 1.499002  |
| 57 | 6 | -2.327284 | 1.334279  | 0.333146  |
| 58 | 6 | -2.577750 | 1.583433  | 1.706578  |
| 59 | 6 | -3.376975 | 1.426405  | -0.614376 |
| 60 | 6 | -3.906281 | 1.786672  | 2.116319  |
| 61 | 6 | -4.688905 | 1.632911  | -0.155418 |
| 62 | 6 | -4.962111 | 1.787085  | 1.203030  |
| 63 | 1 | -4.101074 | 1.963840  | 3.169408  |
| 64 | 1 | -5.494694 | 1.683442  | -0.882141 |
| 65 | 1 | -5.981322 | 1.935766  | 1.544553  |
| 66 | 6 | -3.138641 | 1.404050  | -2.109091 |
| 67 | 1 | -3.106992 | 2.428088  | -2.507855 |
| 68 | 1 | -2.201523 | 0.922180  | -2.379940 |
| 69 | 1 | -3.954109 | 0.890304  | -2.628862 |
| 70 | 6 | -1.473630 | 1.745863  | 2.723038  |
| 71 | 1 | -0.837295 | 0.863915  | 2.785553  |
| 72 | 1 | -0.831476 | 2.603128  | 2.481759  |
| 73 | 1 | -1.899537 | 1.925194  | 3.714588  |
| 74 | 6 | 3.821819  | -2.033470 | -1.130491 |
| 75 | 1 | 3.316751  | -2.924153 | -0.742998 |
| 76 | 1 | 3.203799  | -1.647401 | -1.946889 |
| 77 | 1 | 4.784782  | -2.343778 | -1.548782 |
| 78 | 6 | 2.015218  | 1.159568  | 2.425282  |
| 79 | 1 | 1.343661  | 1.710205  | 1.757859  |
| 80 | 1 | 1.407132  | 0.401478  | 2.926780  |
| 81 | 1 | 2.396155  | 1.859145  | 3.176841  |

**$^{16}\text{Ar}$**  (E = -828.2657587 a.u.)

| Center Number | Atomic Number | Coordinates (Angstroms) |           |           |
|---------------|---------------|-------------------------|-----------|-----------|
|               |               | X                       | Y         | Z         |
| 1             | 22            | -0.064002               | 0.600820  | -0.420696 |
| 2             | 7             | 1.629342                | 0.466207  | -0.252674 |
| 3             | 6             | -0.588906               | -1.343681 | 0.779215  |
| 4             | 6             | -0.776589               | -1.614349 | -0.605828 |
| 5             | 6             | -1.544330               | -0.353124 | 1.157682  |
| 6             | 17            | -0.703872               | 2.692510  | -1.224387 |
| 7             | 6             | -1.885010               | -0.826626 | -1.067052 |
| 8             | 6             | -2.366849               | -0.057544 | 0.021483  |
| 9             | 6             | -0.070390               | -2.690906 | -1.394267 |
| 10            | 6             | 0.365492                | -2.072875 | 1.690548  |
| 11            | 6             | -1.739718               | 0.211628  | 2.545452  |
| 12            | 6             | -3.558654               | 0.864269  | 0.000521  |
| 13            | 6             | -2.469704               | -0.856150 | -2.458094 |
| 14            | 1             | -0.624694               | -3.637662 | -1.324187 |
| 15            | 1             | 0.939626                | -2.870227 | -1.014823 |
| 16            | 1             | 0.008671                | -2.439559 | -2.457071 |
| 17            | 1             | -0.050057               | -3.050837 | 1.970742  |
| 18            | 1             | 0.547830                | -1.517618 | 2.614936  |
| 19            | 1             | 1.333730                | -2.245200 | 1.211141  |
| 20            | 1             | -2.521604               | -0.347704 | 3.077577  |
| 21            | 1             | -2.051285               | 1.261377  | 2.520795  |
| 22            | 1             | -0.826364               | 0.146947  | 3.144421  |
| 23            | 1             | -4.487434               | 0.294557  | 0.144005  |
| 24            | 1             | -3.637756               | 1.401489  | -0.949368 |
| 25            | 1             | -3.504236               | 1.613179  | 0.796129  |
| 26            | 1             | -3.237765               | -1.638756 | -2.532866 |
| 27            | 1             | -1.711070               | -1.074428 | -3.217264 |
| 28            | 1             | -2.941629               | 0.096136  | -2.718340 |
| 29            | 6             | 2.968859                | 0.200623  | -0.037329 |
| 30            | 6             | 3.559491                | 0.499933  | 1.225169  |
| 31            | 6             | 3.766427                | -0.341674 | -1.086843 |
| 32            | 6             | 4.917964                | 0.220627  | 1.421360  |
| 33            | 6             | 5.120887                | -0.602481 | -0.842885 |
| 34            | 6             | 5.698942                | -0.333138 | 0.401813  |
| 35            | 1             | 5.366838                | 0.448158  | 2.384302  |

|    |   |          |           |           |
|----|---|----------|-----------|-----------|
| 36 | 1 | 5.728071 | -1.015707 | -1.643572 |
| 37 | 1 | 6.750169 | -0.542580 | 0.572200  |
| 38 | 6 | 3.161979 | -0.605413 | -2.444681 |
| 39 | 1 | 2.364709 | -1.357426 | -2.396993 |
| 40 | 1 | 2.715056 | 0.305584  | -2.863597 |
| 41 | 1 | 3.921487 | -0.965019 | -3.145860 |
| 42 | 6 | 2.734777 | 1.129278  | 2.321437  |
| 43 | 1 | 2.283117 | 2.072184  | 1.986739  |
| 44 | 1 | 1.910891 | 0.476449  | 2.636691  |
| 45 | 1 | 3.350945 | 1.340441  | 3.200897  |

**17<sup>Ar</sup>** (E = -675.8655679 a.u.)

| Center Number | Atomic Number | Coordinates (Angstroms) |           |           |
|---------------|---------------|-------------------------|-----------|-----------|
|               |               | X                       | Y         | Z         |
| 1             | 7             | 1.297305                | 0.837606  | 0.006404  |
| 2             | 6             | 0.111476                | 0.378815  | 0.002419  |
| 3             | 6             | -1.113310               | 1.230516  | -0.011293 |
| 4             | 6             | -2.267266               | 0.317981  | -0.011666 |
| 5             | 6             | -0.346816               | -1.072842 | 0.010098  |
| 6             | 6             | -1.854569               | -0.969819 | 0.000288  |
| 7             | 1             | 0.040081                | -1.618135 | -0.859368 |
| 8             | 1             | 0.029361                | -1.605788 | 0.891803  |
| 9             | 6             | -2.687949               | -2.218766 | 0.004789  |
| 10            | 6             | -3.679313               | 0.837689  | -0.023938 |
| 11            | 1             | -4.416303               | 0.030424  | -0.022146 |
| 12            | 1             | -3.858101               | 1.457626  | -0.912669 |
| 13            | 1             | -3.868515               | 1.471116  | 0.853043  |
| 14            | 1             | -3.760925               | -2.008892 | -0.001838 |
| 15            | 1             | -2.466045               | -2.829166 | 0.891653  |
| 16            | 1             | -2.457579               | -2.841383 | -0.871358 |
| 17            | 6             | -1.117490               | 2.571956  | -0.020604 |
| 18            | 1             | -2.039266               | 3.141298  | -0.030320 |
| 19            | 1             | -0.183875               | 3.121441  | -0.018547 |
| 20            | 6             | 2.406678                | -0.056993 | 0.020760  |
| 21            | 6             | 2.990778                | -0.457076 | -1.204089 |
| 22            | 6             | 2.970403                | -0.443070 | 1.259580  |
| 23            | 6             | 4.126141                | -1.281036 | -1.166847 |
| 24            | 6             | 4.106171                | -1.267279 | 1.250468  |
| 25            | 6             | 4.681326                | -1.691523 | 0.048863  |
| 26            | 1             | 4.578993                | -1.593526 | -2.103642 |
| 27            | 1             | 4.543472                | -1.568979 | 2.198120  |
| 28            | 1             | 5.561662                | -2.326273 | 0.059750  |
| 29            | 6             | 2.369855                | 0.037665  | 2.561562  |
| 30            | 1             | 2.270914                | 1.130171  | 2.572716  |
| 31            | 1             | 1.363995                | -0.369556 | 2.730090  |
| 32            | 1             | 2.993885                | -0.259812 | 3.409537  |
| 33            | 6             | 2.411498                | 0.008643  | -2.521058 |
| 34            | 1             | 1.408325                | -0.400304 | -2.700907 |
| 35            | 1             | 2.313106                | 1.100981  | -2.546441 |
| 36            | 1             | 3.048960                | -0.298734 | -3.355397 |

**18<sup>Ar</sup>** (E = -1076.5594162 a.u.)

| Center Number | Atomic Number | Coordinates (Angstroms) |           |           |
|---------------|---------------|-------------------------|-----------|-----------|
|               |               | X                       | Y         | Z         |
| 1             | 22            | -0.135137               | 0.001214  | -0.397039 |
| 2             | 7             | -0.691344               | 1.623922  | -0.302147 |
| 3             | 6             | -1.774412               | -0.789316 | 1.107077  |
| 4             | 6             | -0.514134               | -0.884469 | 1.766796  |
| 5             | 6             | -1.763648               | -1.718456 | 0.028589  |
| 6             | 17            | -0.067433               | -0.555790 | -2.699682 |
| 7             | 6             | 0.246731                | -1.917953 | 1.127337  |
| 8             | 6             | -0.520461               | -2.427183 | 0.054343  |
| 9             | 6             | -0.153010               | -0.201314 | 3.064112  |
| 10            | 6             | -2.943945               | 0.045657  | 1.563952  |
| 11            | 6             | -2.906087               | -2.030658 | -0.905788 |
| 12            | 6             | -0.158527               | -3.562843 | -0.867240 |

|    |   |           |           |           |
|----|---|-----------|-----------|-----------|
| 13 | 6 | 1.577673  | -2.445084 | 1.602899  |
| 14 | 1 | -0.453113 | -0.821934 | 3.921025  |
| 15 | 1 | -0.660344 | 0.762736  | 3.165938  |
| 16 | 1 | 0.924741  | -0.027506 | 3.156669  |
| 17 | 1 | -3.489174 | -0.466529 | 2.369624  |
| 18 | 1 | -3.652131 | 0.229524  | 0.750959  |
| 19 | 1 | -2.623452 | 1.020873  | 1.941908  |
| 20 | 1 | -3.428679 | -2.940559 | -0.576755 |
| 21 | 1 | -2.553424 | -2.198215 | -1.928218 |
| 22 | 1 | -3.641539 | -1.221437 | -0.934409 |
| 23 | 1 | -0.749023 | -4.458968 | -0.629339 |
| 24 | 1 | 0.898746  | -3.833299 | -0.779836 |
| 25 | 1 | -0.352070 | -3.302434 | -1.913581 |
| 26 | 1 | 1.430861  | -3.238092 | 2.349696  |
| 27 | 1 | 2.182711  | -1.663727 | 2.074405  |
| 28 | 1 | 2.165152  | -2.872325 | 0.783745  |
| 29 | 7 | 2.056371  | 0.237711  | -0.175575 |
| 30 | 6 | 2.899563  | -0.372677 | -1.043321 |
| 31 | 6 | 2.593434  | 0.997329  | 0.807900  |
| 32 | 6 | 4.286425  | -0.246088 | -0.954897 |
| 33 | 1 | 2.432694  | -0.954778 | -1.827852 |
| 34 | 6 | 3.968699  | 1.168242  | 0.962134  |
| 35 | 1 | 1.892707  | 1.484647  | 1.471270  |
| 36 | 6 | 4.835820  | 0.536059  | 0.065030  |
| 37 | 1 | 4.915916  | -0.750203 | -1.678105 |
| 38 | 1 | 4.345602  | 1.790014  | 1.765245  |
| 39 | 1 | 5.909772  | 0.653584  | 0.156405  |
| 40 | 6 | -1.406692 | 2.806958  | -0.225522 |
| 41 | 6 | -1.046063 | 3.826807  | 0.705438  |
| 42 | 6 | -2.516221 | 3.024895  | -1.100516 |
| 43 | 6 | -1.797365 | 5.008424  | 0.759626  |
| 44 | 6 | -3.237176 | 4.222190  | -1.009457 |
| 45 | 6 | -2.891170 | 5.213274  | -0.085687 |
| 46 | 1 | -1.513781 | 5.777180  | 1.473767  |
| 47 | 1 | -4.078641 | 4.377665  | -1.679411 |
| 48 | 1 | -3.461807 | 6.135054  | -0.030564 |
| 49 | 6 | -2.903987 | 1.980106  | -2.117351 |
| 50 | 1 | -2.048567 | 1.681477  | -2.731590 |
| 51 | 1 | -3.269810 | 1.063154  | -1.637137 |
| 52 | 1 | -3.696601 | 2.353180  | -2.774056 |
| 53 | 6 | 0.148528  | 3.654576  | 1.611145  |
| 54 | 1 | 0.082896  | 2.728574  | 2.194861  |
| 55 | 1 | 1.080161  | 3.607556  | 1.032750  |
| 56 | 1 | 0.230303  | 4.492238  | 2.311299  |

**TS9<sup>Ar</sup>-26IS<sup>Ar</sup>** (E = -1504.1030172 a.u.)

| Center Number | Atomic Number | Coordinates (Angstroms) |           |           |
|---------------|---------------|-------------------------|-----------|-----------|
|               |               | X                       | Y         | Z         |
| 1             | 22            | 0.338902                | -0.857335 | -0.020672 |
| 2             | 7             | 1.881592                | 0.761291  | -0.145534 |
| 3             | 6             | 0.891108                | 0.850367  | -0.932172 |
| 4             | 7             | -1.463817               | 0.011529  | 0.341137  |
| 5             | 6             | 1.833117                | -1.993823 | -1.621651 |
| 6             | 6             | 0.571132                | -1.737515 | -2.239749 |
| 7             | 6             | 1.628782                | -2.905801 | -0.562067 |
| 8             | 17            | 0.726682                | -1.480984 | 2.225153  |
| 9             | 6             | -0.419227               | -2.511587 | -1.555455 |
| 10            | 6             | 0.237176                | -3.227808 | -0.514354 |
| 11            | 6             | -2.302031               | 0.653761  | -0.563100 |
| 12            | 6             | -2.139999               | 0.872990  | -1.902253 |
| 13            | 1             | 0.631836                | 1.657172  | -1.606271 |
| 14            | 6             | -3.297426               | 1.585029  | -2.449737 |
| 15            | 1             | -1.290085               | 0.580506  | -2.495640 |
| 16            | 6             | -3.646530               | 1.261627  | -0.175389 |
| 17            | 6             | -4.193827               | 1.824152  | -1.462512 |

|    |   |           |           |           |
|----|---|-----------|-----------|-----------|
| 18 | 1 | -4.315051 | 0.512306  | 0.263780  |
| 19 | 1 | -3.529948 | 2.037344  | 0.590361  |
| 20 | 6 | -5.521437 | 2.528784  | -1.520440 |
| 21 | 6 | -3.388422 | 1.962051  | -3.906983 |
| 22 | 1 | -4.316362 | 2.495332  | -4.135734 |
| 23 | 1 | -3.346671 | 1.070850  | -4.548569 |
| 24 | 1 | -2.548838 | 2.607844  | -4.200049 |
| 25 | 1 | -5.753331 | 2.875356  | -2.533241 |
| 26 | 1 | -5.542092 | 3.406112  | -0.856943 |
| 27 | 1 | -6.342827 | 1.871303  | -1.199165 |
| 28 | 6 | 0.399625  | -1.060440 | -3.578345 |
| 29 | 6 | 3.159074  | -1.464159 | -2.100978 |
| 30 | 6 | 2.687899  | -3.544832 | 0.296135  |
| 31 | 6 | -0.340987 | -4.292844 | 0.380763  |
| 32 | 6 | -1.847816 | -2.695661 | -2.005116 |
| 33 | 1 | 0.881117  | -1.664245 | -4.360349 |
| 34 | 1 | 0.854436  | -0.064018 | -3.615259 |
| 35 | 1 | -0.655093 | -0.961376 | -3.846759 |
| 36 | 1 | 3.614848  | -2.165837 | -2.813979 |
| 37 | 1 | 3.866558  | -1.323280 | -1.278331 |
| 38 | 1 | 3.049102  | -0.503183 | -2.612305 |
| 39 | 1 | 2.876222  | -4.573798 | -0.043037 |
| 40 | 1 | 2.380173  | -3.586312 | 1.345029  |
| 41 | 1 | 3.636386  | -3.002215 | 0.242173  |
| 42 | 1 | 0.143311  | -5.256297 | 0.169262  |
| 43 | 1 | -1.413880 | -4.424204 | 0.220424  |
| 44 | 1 | -0.174325 | -4.064116 | 1.438898  |
| 45 | 1 | -2.448467 | -3.189275 | -1.237571 |
| 46 | 1 | -1.880043 | -3.322879 | -2.907288 |
| 47 | 1 | -2.332359 | -1.743145 | -2.240081 |
| 48 | 6 | 3.000790  | 1.635322  | 0.067877  |
| 49 | 6 | 3.876569  | 1.317573  | 1.142850  |
| 50 | 6 | 3.278125  | 2.763093  | -0.763650 |
| 51 | 6 | 4.985555  | 2.140019  | 1.388354  |
| 52 | 6 | 4.405749  | 3.548339  | -0.473641 |
| 53 | 6 | 5.252745  | 3.253294  | 0.593464  |
| 54 | 1 | 5.643947  | 1.891982  | 2.214723  |
| 55 | 1 | 4.614430  | 4.405521  | -1.106195 |
| 56 | 1 | 6.115600  | 3.879334  | 0.796037  |
| 57 | 6 | -1.928042 | 0.137552  | 1.717168  |
| 58 | 6 | -1.556152 | 1.274064  | 2.475010  |
| 59 | 6 | -2.795499 | -0.833644 | 2.267384  |
| 60 | 6 | -2.044368 | 1.408107  | 3.784478  |
| 61 | 6 | -3.261140 | -0.665119 | 3.581442  |
| 62 | 6 | -2.888346 | 0.445180  | 4.342133  |
| 63 | 1 | -1.756021 | 2.279236  | 4.366074  |
| 64 | 1 | -3.923799 | -1.415030 | 4.004183  |
| 65 | 1 | -3.256020 | 0.561460  | 5.356919  |
| 66 | 6 | 3.656581  | 0.123777  | 2.036087  |
| 67 | 1 | 2.736929  | 0.210940  | 2.620122  |
| 68 | 1 | 3.556684  | -0.802847 | 1.464367  |
| 69 | 1 | 4.495724  | 0.012347  | 2.729350  |
| 70 | 6 | 2.452027  | 3.179571  | -1.962305 |
| 71 | 1 | 2.319663  | 2.363926  | -2.683854 |
| 72 | 1 | 1.453794  | 3.538111  | -1.681880 |
| 73 | 1 | 2.953458  | 3.998889  | -2.485359 |
| 74 | 6 | -3.221379 | -2.047312 | 1.477124  |
| 75 | 1 | -3.635798 | -1.776859 | 0.499506  |
| 76 | 1 | -2.370840 | -2.710382 | 1.292496  |
| 77 | 1 | -3.979966 | -2.616467 | 2.023545  |
| 78 | 6 | -0.640571 | 2.337972  | 1.912497  |
| 79 | 1 | -0.937906 | 2.643718  | 0.903089  |
| 80 | 1 | -0.645215 | 3.224871  | 2.553988  |
| 81 | 1 | 0.392954  | 1.978247  | 1.847784  |

261S<sup>Ar</sup> (E = -1504.1044452 a.u.)

| Center Number | Atomic Number | Coordinates (Angstroms) |           |           |
|---------------|---------------|-------------------------|-----------|-----------|
|               |               | X                       | Y         | Z         |
| 1             | 22            | -0.261662               | -0.572513 | -0.677851 |
| 2             | 7             | -2.015387               | 0.148084  | 0.502579  |
| 3             | 6             | -1.078154               | -0.386917 | 1.168195  |
| 4             | 7             | 1.371834                | 0.435935  | -0.059521 |
| 5             | 6             | -1.414537               | -2.747037 | -0.794287 |
| 6             | 6             | -0.174568               | -2.906496 | -0.100855 |
| 7             | 6             | -1.132138               | -2.381787 | -2.128709 |
| 8             | 17            | -0.741134               | 0.756499  | -2.579305 |
| 9             | 6             | 0.880408                | -2.644368 | -1.030297 |
| 10            | 6             | 0.285269                | -2.314774 | -2.281205 |
| 11            | 6             | 2.243327                | 0.094533  | 0.971806  |
| 12            | 6             | 2.074819                | -0.788637 | 1.996344  |
| 13            | 1             | -1.012338               | -0.436097 | 2.254891  |
| 14            | 6             | 3.289510                | -0.861991 | 2.814517  |
| 15            | 1             | 1.179951                | -1.352008 | 2.205437  |
| 16            | 6             | 3.645653                | 0.675798  | 1.106459  |
| 17            | 6             | 4.224096                | -0.017781 | 2.314584  |
| 18            | 1             | 4.235865                | 0.493935  | 0.200200  |
| 19            | 1             | 3.626840                | 1.763629  | 1.238107  |
| 20            | 6             | 5.609372                | 0.284614  | 2.816432  |
| 21            | 6             | 3.386018                | -1.753696 | 4.026554  |
| 22            | 1             | 4.358288                | -1.669318 | 4.521702  |
| 23            | 1             | 3.238382                | -2.808101 | 3.754653  |
| 24            | 1             | 2.610671                | -1.500933 | 4.763177  |
| 25            | 1             | 5.854694                | -0.299076 | 3.710038  |
| 26            | 1             | 5.720424                | 1.348372  | 3.073558  |
| 27            | 1             | 6.372073                | 0.062604  | 2.055700  |
| 28            | 6             | -0.018359               | -3.561119 | 1.250308  |
| 29            | 6             | -2.790645               | -3.052097 | -0.259867 |
| 30            | 6             | -2.147799               | -2.223564 | -3.228494 |
| 31            | 6             | 0.984801                | -2.131536 | -3.601497 |
| 32            | 6             | 2.347651                | -2.902201 | -0.795857 |
| 33            | 1             | -0.276709               | -4.627006 | 1.175803  |
| 34            | 1             | -0.667685               | -3.122077 | 2.015358  |
| 35            | 1             | 1.011704                | -3.498612 | 1.608564  |
| 36            | 1             | -3.263301               | -3.836823 | -0.864952 |
| 37            | 1             | -3.452554               | -2.178711 | -0.285017 |
| 38            | 1             | -2.747335               | -3.415716 | 0.770260  |
| 39            | 1             | -2.304994               | -3.186426 | -3.736961 |
| 40            | 1             | -1.820257               | -1.494909 | -3.973788 |
| 41            | 1             | -3.115134               | -1.890673 | -2.839372 |
| 42            | 1             | 0.824944                | -3.018429 | -4.231155 |
| 43            | 1             | 2.062919                | -2.004096 | -3.479970 |
| 44            | 1             | 0.594679                | -1.263947 | -4.143209 |
| 45            | 1             | 2.972127                | -2.339747 | -1.495381 |
| 46            | 1             | 2.568446                | -3.969634 | -0.940064 |
| 47            | 1             | 2.656856                | -2.625463 | 0.215207  |
| 48            | 6             | -3.239058               | 0.723892  | 0.994352  |
| 49            | 6             | -3.763458               | 1.859649  | 0.322940  |
| 50            | 6             | -3.927595               | 0.164182  | 2.108233  |
| 51            | 6             | -4.961651               | 2.424044  | 0.784102  |
| 52            | 6             | -5.135728               | 0.756222  | 2.512998  |
| 53            | 6             | -5.651373               | 1.879255  | 1.867714  |
| 54            | 1             | -5.353136               | 3.299636  | 0.275924  |
| 55            | 1             | -5.671127               | 0.320892  | 3.351391  |
| 56            | 1             | -6.583409               | 2.322510  | 2.203077  |
| 57            | 6             | 1.635917                | 1.768066  | -0.591332 |
| 58            | 6             | 1.179253                | 2.900414  | 0.132397  |
| 59            | 6             | 2.398185                | 1.939303  | -1.770345 |
| 60            | 6             | 1.460324                | 4.183927  | -0.362727 |
| 61            | 6             | 2.661849                | 3.240986  | -2.228138 |



|    |   |           |           |           |
|----|---|-----------|-----------|-----------|
| 62 | 6 | 2.191106  | 4.359961  | -1.539591 |
| 63 | 1 | 1.106247  | 5.049066  | 0.190808  |
| 64 | 1 | 3.245896  | 3.368636  | -3.135225 |
| 65 | 1 | 2.401640  | 5.358764  | -1.909040 |
| 66 | 6 | -3.063370 | 2.488994  | -0.854644 |
| 67 | 1 | -2.045342 | 2.809402  | -0.609950 |
| 68 | 1 | -2.960938 | 1.789836  | -1.688213 |
| 69 | 1 | -3.619924 | 3.365073  | -1.200840 |
| 70 | 6 | -3.453491 | -1.045130 | 2.888538  |
| 71 | 1 | -2.977163 | -1.795981 | 2.253770  |
| 72 | 1 | -2.733664 | -0.773041 | 3.671420  |
| 73 | 1 | -4.303801 | -1.521053 | 3.386845  |
| 74 | 6 | 2.919325  | 0.765967  | -2.563199 |
| 75 | 1 | 3.253918  | -0.049410 | -1.915668 |
| 76 | 1 | 2.133597  | 0.365531  | -3.212260 |
| 77 | 1 | 3.757655  | 1.070549  | -3.198289 |
| 78 | 6 | 0.421236  | 2.765643  | 1.435789  |
| 79 | 1 | 0.955521  | 2.132690  | 2.153788  |
| 80 | 1 | 0.274778  | 3.749330  | 1.892616  |
| 81 | 1 | -0.565769 | 2.315574  | 1.289251  |

**TS26IS<sup>Ar</sup>-26<sup>Ar</sup>** (E = -1504.0863331 a.u.)

| Center Number | Atomic Number | Coordinates (Angstroms) |           |           |
|---------------|---------------|-------------------------|-----------|-----------|
|               |               | X                       | Y         | Z         |
| 1             | 22            | -0.503581               | -0.236841 | -0.610296 |
| 2             | 7             | -2.006736               | 0.222814  | 0.737435  |
| 3             | 6             | -1.111308               | 1.124106  | 0.787984  |
| 4             | 7             | 1.401303                | 0.619638  | -0.270282 |
| 5             | 6             | -1.726481               | -2.170299 | -1.470268 |
| 6             | 6             | -1.080189               | -2.531432 | -0.255309 |
| 7             | 6             | -0.719153               | -1.984517 | -2.458236 |
| 8             | 17            | -1.322936               | 1.038700  | -2.396275 |
| 9             | 6             | 0.327941                | -2.524534 | -0.483097 |
| 10            | 6             | 0.544880                | -2.189602 | -1.856734 |
| 11            | 6             | 1.762577                | 0.981272  | 0.997815  |
| 12            | 6             | 1.305439                | 0.481342  | 2.194856  |
| 13            | 1             | -1.154572               | 2.030981  | 1.392106  |
| 14            | 6             | 1.905694                | 1.216905  | 3.311132  |
| 15            | 1             | 0.682960                | -0.392896 | 2.320576  |
| 16            | 6             | 2.733742                | 2.110948  | 1.324789  |
| 17            | 6             | 2.743383                | 2.170183  | 2.832850  |
| 18            | 1             | 3.735097                | 1.929402  | 0.918787  |
| 19            | 1             | 2.391715                | 3.050074  | 0.872746  |
| 20            | 6             | 3.609948                | 3.146544  | 3.579761  |
| 21            | 6             | 1.612838                | 0.879087  | 4.751319  |
| 22            | 1             | 2.218372                | 1.473165  | 5.442616  |
| 23            | 1             | 1.814725                | -0.181955 | 4.953208  |
| 24            | 1             | 0.556653                | 1.056427  | 4.995831  |
| 25            | 1             | 3.516287                | 3.028596  | 4.664541  |
| 26            | 1             | 3.348912                | 4.187336  | 3.336739  |
| 27            | 1             | 4.672122                | 3.020064  | 3.322018  |
| 28            | 6             | -1.764115               | -3.102553 | 0.960879  |
| 29            | 6             | -3.211119               | -2.203079 | -1.725668 |
| 30            | 6             | -0.947139               | -1.753814 | -3.926112 |
| 31            | 6             | 1.829875                | -2.276027 | -2.641324 |
| 32            | 6             | 1.345837                | -3.049862 | 0.503734  |
| 33            | 1             | -2.009502               | -4.159563 | 0.780394  |
| 34            | 1             | -2.698830               | -2.587557 | 1.196978  |
| 35            | 1             | -1.121874               | -3.067115 | 1.845159  |
| 36            | 1             | -3.514866               | -3.199313 | -2.079359 |
| 37            | 1             | -3.503654               | -1.480163 | -2.493364 |
| 38            | 1             | -3.786206               | -1.987131 | -0.820610 |
| 39            | 1             | -0.958515               | -2.716754 | -4.458585 |
| 40            | 1             | -0.157530               | -1.137233 | -4.365773 |
| 41            | 1             | -1.900166               | -1.253527 | -4.113831 |

|    |   |           |           |           |
|----|---|-----------|-----------|-----------|
| 42 | 1 | 1.729338  | -3.038683 | -3.425912 |
| 43 | 1 | 2.673235  | -2.561356 | -2.010641 |
| 44 | 1 | 2.089228  | -1.333149 | -3.131818 |
| 45 | 1 | 2.273113  | -3.330542 | -0.003005 |
| 46 | 1 | 0.960146  | -3.949208 | 0.999474  |
| 47 | 1 | 1.605866  | -2.329260 | 1.288198  |
| 48 | 6 | -3.266360 | 0.127093  | 1.439505  |
| 49 | 6 | -4.459512 | 0.473266  | 0.763564  |
| 50 | 6 | -3.282055 | -0.293080 | 2.790794  |
| 51 | 6 | -5.676842 | 0.323921  | 1.448736  |
| 52 | 6 | -4.524049 | -0.425112 | 3.432147  |
| 53 | 6 | -5.716348 | -0.132692 | 2.766905  |
| 54 | 1 | -6.597698 | 0.583072  | 0.935331  |
| 55 | 1 | -4.545137 | -0.755728 | 4.466018  |
| 56 | 1 | -6.667316 | -0.246766 | 3.276873  |
| 57 | 6 | 2.349148  | 1.018993  | -1.292009 |
| 58 | 6 | 2.115709  | 2.181249  | -2.075413 |
| 59 | 6 | 3.567341  | 0.302606  | -1.460648 |
| 60 | 6 | 3.012068  | 2.496644  | -3.113034 |
| 61 | 6 | 4.436288  | 0.652945  | -2.504957 |
| 62 | 6 | 4.150226  | 1.727063  | -3.351376 |
| 63 | 1 | 2.816642  | 3.376662  | -3.720178 |
| 64 | 1 | 5.351212  | 0.082562  | -2.641291 |
| 65 | 1 | 4.825039  | 1.981126  | -4.163018 |
| 66 | 6 | -4.449701 | 1.065563  | -0.625493 |
| 67 | 1 | -4.119033 | 2.112625  | -0.601318 |
| 68 | 1 | -3.766862 | 0.548729  | -1.300919 |
| 69 | 1 | -5.454773 | 1.046285  | -1.057403 |
| 70 | 6 | -2.011186 | -0.564328 | 3.561954  |
| 71 | 1 | -1.354198 | -1.266895 | 3.042133  |
| 72 | 1 | -1.433176 | 0.353852  | 3.718968  |
| 73 | 1 | -2.243884 | -0.983566 | 4.544980  |
| 74 | 6 | 4.000976  | -0.770120 | -0.487620 |
| 75 | 1 | 4.583959  | -0.331283 | 0.334961  |
| 76 | 1 | 3.152066  | -1.276160 | -0.034393 |
| 77 | 1 | 4.642777  | -1.511361 | -0.975895 |
| 78 | 6 | 1.016267  | 3.175305  | -1.768625 |
| 79 | 1 | 0.411617  | 2.860919  | -0.918933 |
| 80 | 1 | 1.461047  | 4.153925  | -1.540841 |
| 81 | 1 | 0.340791  | 3.308653  | -2.619038 |

**26<sup>Ar</sup>** (E = -1504.0959021 a.u.)

| Center Number | Atomic Number | Coordinates (Angstroms) |           |           |
|---------------|---------------|-------------------------|-----------|-----------|
|               |               | X                       | Y         | Z         |
| 1             | 22            | -0.141191               | -0.718291 | -0.513068 |
| 2             | 7             | -1.908600               | 0.303932  | -0.104522 |
| 3             | 6             | -1.208181               | 0.954212  | -0.939923 |
| 4             | 7             | 1.350069                | 0.429190  | 0.092672  |
| 5             | 6             | -0.875096               | -2.987454 | -0.773142 |
| 6             | 6             | -1.190283               | -2.590106 | 0.555679  |
| 7             | 6             | 0.546406                | -3.115882 | -0.871299 |
| 8             | 17            | 0.029826                | -0.703497 | -2.931716 |
| 9             | 6             | 0.035739                | -2.417616 | 1.260140  |
| 10            | 6             | 1.104766                | -2.781521 | 0.383474  |
| 11            | 6             | 1.208182                | 1.819666  | -0.212952 |
| 12            | 6             | 0.561740                | 2.790652  | 0.476101  |
| 13            | 1             | -1.494428               | 1.864868  | -1.464500 |
| 14            | 6             | 0.660500                | 4.074627  | -0.235704 |
| 15            | 1             | 0.024439                | 2.658006  | 1.404634  |
| 16            | 6             | 1.801188                | 2.452789  | -1.456231 |
| 17            | 6             | 1.379491                | 3.899057  | -1.370405 |
| 18            | 1             | 2.893030                | 2.355573  | -1.476212 |
| 19            | 1             | 1.426708                | 1.950974  | -2.356159 |
| 20            | 6             | 1.771048                | 4.906415  | -2.416612 |
| 21            | 6             | 0.035801                | 5.338409  | 0.298643  |

|    |   |           |           |           |
|----|---|-----------|-----------|-----------|
| 22 | 1 | 0.209923  | 6.192617  | -0.362839 |
| 23 | 1 | 0.443098  | 5.590979  | 1.287411  |
| 24 | 1 | -1.050279 | 5.222688  | 0.418981  |
| 25 | 1 | 1.373520  | 5.902148  | -2.193875 |
| 26 | 1 | 1.403339  | 4.614206  | -3.410442 |
| 27 | 1 | 2.864175  | 4.994567  | -2.496560 |
| 28 | 6 | -2.563604 | -2.595324 | 1.177358  |
| 29 | 6 | -1.854527 | -3.416619 | -1.836895 |
| 30 | 6 | 1.278851  | -3.686373 | -2.055658 |
| 31 | 6 | 2.519342  | -3.066372 | 0.816864  |
| 32 | 6 | 0.168287  | -2.224487 | 2.750390  |
| 33 | 1 | -2.784029 | -3.598083 | 1.571379  |
| 34 | 1 | -3.347491 | -2.346128 | 0.457531  |
| 35 | 1 | -2.644794 | -1.891742 | 2.009589  |
| 36 | 1 | -1.940521 | -4.513057 | -1.850649 |
| 37 | 1 | -1.532047 | -3.091844 | -2.830298 |
| 38 | 1 | -2.855865 | -3.013524 | -1.657071 |
| 39 | 1 | 1.149251  | -4.777916 | -2.091697 |
| 40 | 1 | 2.351851  | -3.480161 | -2.006704 |
| 41 | 1 | 0.901347  | -3.269250 | -2.993897 |
| 42 | 1 | 2.575744  | -4.095564 | 1.202459  |
| 43 | 1 | 2.858514  | -2.397118 | 1.609653  |
| 44 | 1 | 3.228443  | -2.986769 | -0.009638 |
| 45 | 1 | 1.128828  | -1.778576 | 3.018465  |
| 46 | 1 | 0.102439  | -3.196961 | 3.260824  |
| 47 | 1 | -0.625192 | -1.592329 | 3.160106  |
| 48 | 6 | -3.255627 | 0.548622  | 0.340273  |
| 49 | 6 | -4.319272 | 0.427165  | -0.585744 |
| 50 | 6 | -3.486977 | 0.882917  | 1.692051  |
| 51 | 6 | -5.627065 | 0.632549  | -0.118238 |
| 52 | 6 | -4.811537 | 1.084374  | 2.111181  |
| 53 | 6 | -5.876778 | 0.957488  | 1.217404  |
| 54 | 1 | -6.453160 | 0.533617  | -0.815772 |
| 55 | 1 | -4.999926 | 1.341688  | 3.149151  |
| 56 | 1 | -6.895489 | 1.109125  | 1.558966  |
| 57 | 6 | 2.674226  | 0.179539  | 0.634006  |
| 58 | 6 | 3.740452  | -0.238093 | -0.205075 |
| 59 | 6 | 2.915690  | 0.410078  | 2.016788  |
| 60 | 6 | 5.013053  | -0.441198 | 0.358669  |
| 61 | 6 | 4.198622  | 0.178960  | 2.538672  |
| 62 | 6 | 5.247950  | -0.242244 | 1.718765  |
| 63 | 1 | 5.823651  | -0.766470 | -0.288104 |
| 64 | 1 | 4.371033  | 0.343168  | 3.598912  |
| 65 | 1 | 6.235676  | -0.411971 | 2.135923  |
| 66 | 6 | -4.084934 | 0.088205  | -2.042211 |
| 67 | 1 | -3.693193 | 0.946096  | -2.603330 |
| 68 | 1 | -3.362786 | -0.723666 | -2.170204 |
| 69 | 1 | -5.023429 | -0.211135 | -2.517637 |
| 70 | 6 | -2.349337 | 1.066451  | 2.669164  |
| 71 | 1 | -1.544426 | 0.346903  | 2.498855  |
| 72 | 1 | -1.905761 | 2.066698  | 2.577657  |
| 73 | 1 | -2.700907 | 0.957078  | 3.699619  |
| 74 | 6 | 1.842273  | 0.932468  | 2.944866  |
| 75 | 1 | 1.834806  | 2.030260  | 2.953283  |
| 76 | 1 | 0.848280  | 0.608169  | 2.633288  |
| 77 | 1 | 2.019334  | 0.596218  | 3.972234  |
| 78 | 6 | 3.575495  | -0.468536 | -1.692272 |
| 79 | 1 | 3.934049  | 0.395236  | -2.269098 |
| 80 | 1 | 4.168767  | -1.331910 | -2.015549 |
| 81 | 1 | 2.537041  | -0.633611 | -1.977824 |

TS26<sup>Ar</sup>-27<sup>Ar</sup> (E = -1504.0836899 a.u.)

| Center Number | Atomic Number | Coordinates (Angstroms) |   |   |
|---------------|---------------|-------------------------|---|---|
|               |               | X                       | Y | Z |

|    |    |           |           |           |
|----|----|-----------|-----------|-----------|
| 1  | 22 | -0.069757 | -0.595960 | -0.221080 |
| 2  | 7  | -1.671441 | 0.572934  | -0.116289 |
| 3  | 6  | -0.738377 | 1.252263  | -0.736172 |
| 4  | 7  | 1.760259  | 0.520172  | 0.134322  |
| 5  | 6  | -0.279462 | -1.931678 | 1.756955  |
| 6  | 6  | 0.892073  | -2.455326 | 1.122707  |
| 7  | 6  | -1.403234 | -2.254675 | 0.936423  |
| 8  | 17 | -0.037472 | -0.987891 | -2.576643 |
| 9  | 6  | 0.504531  | -3.020300 | -0.112970 |
| 10 | 6  | -0.917965 | -2.900402 | -0.227702 |
| 11 | 6  | 1.607377  | 1.855228  | 0.213570  |
| 12 | 6  | 0.427748  | 2.534923  | 0.545907  |
| 13 | 1  | -0.903036 | 2.016992  | -1.489687 |
| 14 | 6  | 0.626886  | 3.972754  | 0.274894  |
| 15 | 1  | -0.237001 | 2.200072  | 1.324762  |
| 16 | 6  | 2.633172  | 2.880203  | -0.245325 |
| 17 | 6  | 1.872739  | 4.188456  | -0.204005 |
| 18 | 1  | 3.510704  | 2.905768  | 0.412304  |
| 19 | 1  | 3.012681  | 2.628774  | -1.242710 |
| 20 | 6  | 2.524566  | 5.476176  | -0.627025 |
| 21 | 6  | -0.462241 | 4.982265  | 0.529345  |
| 22 | 1  | -0.145356 | 6.001379  | 0.288246  |
| 23 | 1  | -0.770114 | 4.966636  | 1.584384  |
| 24 | 1  | -1.356424 | 4.755709  | -0.066965 |
| 25 | 1  | 1.853523  | 6.332728  | -0.506726 |
| 26 | 1  | 2.834535  | 5.441996  | -1.681616 |
| 27 | 1  | 3.431296  | 5.675858  | -0.037166 |
| 28 | 6  | 2.228371  | -2.644017 | 1.790881  |
| 29 | 6  | -0.340074 | -1.440150 | 3.185015  |
| 30 | 6  | -2.854711 | -2.139459 | 1.325534  |
| 31 | 6  | -1.755154 | -3.537717 | -1.304894 |
| 32 | 6  | 1.387997  | -3.772322 | -1.073084 |
| 33 | 1  | 2.248764  | -3.631958 | 2.275132  |
| 34 | 1  | 2.411443  | -1.897336 | 2.565145  |
| 35 | 1  | 3.061456  | -2.605353 | 1.085601  |
| 36 | 1  | -0.099092 | -2.260282 | 3.876319  |
| 37 | 1  | -1.338995 | -1.080594 | 3.444157  |
| 38 | 1  | 0.369298  | -0.630973 | 3.387883  |
| 39 | 1  | -3.184018 | -3.075535 | 1.799084  |
| 40 | 1  | -3.501125 | -1.961967 | 0.461961  |
| 41 | 1  | -3.032159 | -1.329645 | 2.036225  |
| 42 | 1  | -1.898645 | -4.606183 | -1.086441 |
| 43 | 1  | -1.276585 | -3.452827 | -2.284045 |
| 44 | 1  | -2.746284 | -3.079493 | -1.376042 |
| 45 | 1  | 1.261357  | -4.856852 | -0.942598 |
| 46 | 1  | 2.445597  | -3.541099 | -0.914193 |
| 47 | 1  | 1.139242  | -3.529363 | -2.111142 |
| 48 | 6  | -3.063127 | 0.887530  | 0.054959  |
| 49 | 6  | -3.530402 | 1.371001  | 1.299258  |
| 50 | 6  | -3.953112 | 0.710813  | -1.034434 |
| 51 | 6  | -4.898888 | 1.655355  | 1.442261  |
| 52 | 6  | -5.311541 | 1.009165  | -0.845390 |
| 53 | 6  | -5.788048 | 1.476043  | 0.382094  |
| 54 | 1  | -5.260855 | 2.020604  | 2.399097  |
| 55 | 1  | -5.997099 | 0.869680  | -1.675985 |
| 56 | 1  | -6.842941 | 1.696578  | 0.510236  |
| 57 | 6  | 3.142537  | 0.093420  | 0.250889  |
| 58 | 6  | 3.788072  | 0.222587  | 1.511735  |
| 59 | 6  | 3.864040  | -0.398345 | -0.864295 |
| 60 | 6  | 5.116731  | -0.205342 | 1.650633  |
| 61 | 6  | 5.195076  | -0.816727 | -0.679327 |
| 62 | 6  | 5.819306  | -0.735357 | 0.565742  |
| 63 | 1  | 5.598994  | -0.119084 | 2.620212  |
| 64 | 1  | 5.746001  | -1.191258 | -1.537328 |

|    |   |           |           |           |
|----|---|-----------|-----------|-----------|
| 65 | 1 | 6.846617  | -1.064519 | 0.686092  |
| 66 | 6 | -2.603002 | 1.616329  | 2.468636  |
| 67 | 1 | -1.755868 | 0.927103  | 2.469317  |
| 68 | 1 | -2.195201 | 2.635861  | 2.446188  |
| 69 | 1 | -3.137408 | 1.504244  | 3.417904  |
| 70 | 6 | -3.473232 | 0.219398  | -2.380444 |
| 71 | 1 | -2.846110 | 0.964660  | -2.885251 |
| 72 | 1 | -2.859125 | -0.681489 | -2.297791 |
| 73 | 1 | -4.324502 | 0.004652  | -3.033376 |
| 74 | 6 | 3.085072  | 0.822608  | 2.710886  |
| 75 | 1 | 3.610027  | 0.560127  | 3.634750  |
| 76 | 1 | 3.047877  | 1.918953  | 2.655657  |
| 77 | 1 | 2.049676  | 0.481870  | 2.789730  |
| 78 | 6 | 3.277666  | -0.441623 | -2.255081 |
| 79 | 1 | 4.078670  | -0.465563 | -3.001272 |
| 80 | 1 | 2.645081  | -1.320473 | -2.412390 |
| 81 | 1 | 2.639672  | 0.422716  | -2.455273 |

**27<sup>Ar</sup>** (E = -1504.125476 a.u.)

| Center Number | Atomic Number | Coordinates (Angstroms) |           |           |
|---------------|---------------|-------------------------|-----------|-----------|
|               |               | X                       | Y         | Z         |
| 1             | 22            | -0.266651               | -0.740094 | -0.475386 |
| 2             | 7             | -1.691565               | 0.397899  | -0.009650 |
| 3             | 6             | -0.886302               | 1.240877  | -0.795982 |
| 4             | 7             | 1.605458                | 0.537755  | 0.143168  |
| 5             | 6             | -0.507887               | -2.310281 | 1.340604  |
| 6             | 6             | 0.727127                | -2.669771 | 0.716390  |
| 7             | 6             | -1.561953               | -2.586762 | 0.421082  |
| 8             | 17            | -0.130509               | -0.840732 | -2.871032 |
| 9             | 6             | 0.441178                | -3.119023 | -0.596721 |
| 10            | 6             | -0.974435               | -3.072797 | -0.777429 |
| 11            | 6             | 1.353154                | 1.798546  | 0.104394  |
| 12            | 6             | -0.046761               | 2.301567  | -0.095436 |
| 13            | 1             | -1.245647               | 1.520609  | -1.785744 |
| 14            | 6             | 0.199211                | 3.661689  | -0.740343 |
| 15            | 1             | -0.472024               | 2.478816  | 0.907260  |
| 16            | 6             | 2.316916                | 2.959306  | 0.064613  |
| 17            | 6             | 1.488792                | 4.025653  | -0.635077 |
| 18            | 1             | 2.606980                | 3.275379  | 1.076926  |
| 19            | 1             | 3.246302                | 2.703614  | -0.453755 |
| 20            | 6             | 2.150386                | 5.304361  | -1.070992 |
| 21            | 6             | -0.946899               | 4.447594  | -1.314336 |
| 22            | 1             | -0.634592               | 5.433364  | -1.670810 |
| 23            | 1             | -1.733429               | 4.589687  | -0.560020 |
| 24            | 1             | -1.408858               | 3.913838  | -2.154053 |
| 25            | 1             | 1.449078                | 5.988520  | -1.556873 |
| 26            | 1             | 2.966772                | 5.100272  | -1.777977 |
| 27            | 1             | 2.595820                | 5.828699  | -0.213308 |
| 28            | 6             | 2.045028                | -2.834570 | 1.430538  |
| 29            | 6             | -0.683992               | -2.017238 | 2.811178  |
| 30            | 6             | -3.036239               | -2.602638 | 0.736692  |
| 31            | 6             | -1.720527               | -3.622307 | -1.965650 |
| 32            | 6             | 1.427235                | -3.692731 | -1.581828 |
| 33            | 1             | 2.122099                | -3.862932 | 1.814217  |
| 34            | 1             | 2.138245                | -2.161901 | 2.285658  |
| 35            | 1             | 2.903840                | -2.663387 | 0.776848  |
| 36            | 1             | -0.614731               | -2.948901 | 3.392127  |
| 37            | 1             | -1.659765               | -1.572581 | 3.019791  |
| 38            | 1             | 0.082230                | -1.338821 | 3.200204  |
| 39            | 1             | -3.331354               | -3.603611 | 1.084198  |
| 40            | 1             | -3.646634               | -2.366218 | -0.139245 |
| 41            | 1             | -3.299414               | -1.887272 | 1.518923  |
| 42            | 1             | -1.890475               | -4.701601 | -1.836615 |
| 43            | 1             | -1.161178               | -3.473644 | -2.892672 |
| 44            | 1             | -2.698808               | -3.147302 | -2.089356 |

|    |   |           |           |           |
|----|---|-----------|-----------|-----------|
| 45 | 1 | 1.400737  | -4.791920 | -1.560207 |
| 46 | 1 | 2.452255  | -3.383837 | -1.353482 |
| 47 | 1 | 1.198347  | -3.371784 | -2.602878 |
| 48 | 6 | -3.031512 | 0.665240  | 0.397976  |
| 49 | 6 | -3.311314 | 1.051655  | 1.733530  |
| 50 | 6 | -4.089501 | 0.562225  | -0.547050 |
| 51 | 6 | -4.644233 | 1.294795  | 2.109488  |
| 52 | 6 | -5.403479 | 0.818176  | -0.129167 |
| 53 | 6 | -5.687915 | 1.177942  | 1.191548  |
| 54 | 1 | -4.855245 | 1.583617  | 3.135862  |
| 55 | 1 | -6.209963 | 0.728261  | -0.851669 |
| 56 | 1 | -6.711900 | 1.365788  | 1.499045  |
| 57 | 6 | 2.982233  | 0.164122  | 0.409866  |
| 58 | 6 | 3.451727  | 0.203383  | 1.743303  |
| 59 | 6 | 3.826753  | -0.224148 | -0.654768 |
| 60 | 6 | 4.774813  | -0.191355 | 1.999359  |
| 61 | 6 | 5.142986  | -0.611583 | -0.351106 |
| 62 | 6 | 5.616289  | -0.603457 | 0.963219  |
| 63 | 1 | 5.139504  | -0.175955 | 3.022135  |
| 64 | 1 | 5.798942  | -0.912310 | -1.162385 |
| 65 | 1 | 6.634958  | -0.910051 | 1.177591  |
| 66 | 6 | -2.218494 | 1.252811  | 2.762706  |
| 67 | 1 | -1.293915 | 0.755967  | 2.466697  |
| 68 | 1 | -1.995683 | 2.320953  | 2.895639  |
| 69 | 1 | -2.523623 | 0.867050  | 3.742466  |
| 70 | 6 | -3.823668 | 0.188218  | -1.986901 |
| 71 | 1 | -3.396294 | 1.029072  | -2.548909 |
| 72 | 1 | -3.104476 | -0.631064 | -2.073203 |
| 73 | 1 | -4.752052 | -0.104960 | -2.487377 |
| 74 | 6 | 2.571387  | 0.659524  | 2.887438  |
| 75 | 1 | 2.995732  | 0.346890  | 3.846085  |
| 76 | 1 | 2.473675  | 1.753050  | 2.917577  |
| 77 | 1 | 1.557955  | 0.254216  | 2.812238  |
| 78 | 6 | 3.365023  | -0.175999 | -2.091828 |
| 79 | 1 | 4.130430  | -0.591918 | -2.753579 |
| 80 | 1 | 2.433174  | -0.723990 | -2.255586 |
| 81 | 1 | 3.169941  | 0.855082  | -2.416218 |

TS27<sup>Ar</sup>-25<sup>Ar</sup> (E = -1504.1062454 a.u.)

| Center Number | Atomic Number | Coordinates (Angstroms) |           |           |
|---------------|---------------|-------------------------|-----------|-----------|
|               |               | X                       | Y         | Z         |
| 1             | 22            | -0.211640               | -0.487077 | -0.291943 |
| 2             | 7             | -1.539642               | 0.795975  | 0.137915  |
| 3             | 6             | -0.669988               | 1.704884  | -0.460446 |
| 4             | 7             | 1.604536                | 0.350057  | 0.326013  |
| 5             | 6             | -0.699950               | -2.077234 | 1.435919  |
| 6             | 6             | 0.500948                | -2.565174 | 0.832079  |
| 7             | 6             | -1.753122               | -2.189273 | 0.481357  |
| 8             | 17            | -0.082806               | -0.424671 | -2.688469 |
| 9             | 6             | 0.205134                | -2.915227 | -0.506331 |
| 10            | 6             | -1.189189               | -2.680684 | -0.724262 |
| 11            | 6             | 1.446596                | 1.616251  | -0.076346 |
| 12            | 6             | 0.326544                | 2.504030  | 0.355162  |
| 13            | 1             | -0.863713               | 2.075977  | -1.465291 |
| 14            | 6             | 0.686924                | 3.863033  | -0.192569 |
| 15            | 1             | 0.115433                | 2.478764  | 1.426173  |
| 16            | 6             | 2.388812                | 2.407534  | -0.961835 |
| 17            | 6             | 1.812954                | 3.809039  | -0.923113 |
| 18            | 1             | 3.415882                | 2.349454  | -0.576775 |
| 19            | 1             | 2.419327                | 1.994557  | -1.977041 |
| 20            | 6             | 2.502148                | 4.915449  | -1.673282 |
| 21            | 6             | -0.207798               | 5.042506  | 0.075807  |
| 22            | 1             | 0.139029                | 5.950467  | -0.426071 |
| 23            | 1             | -0.266023               | 5.252254  | 1.153050  |
| 24            | 1             | -1.231618               | 4.836374  | -0.264379 |

|    |   |           |           |           |
|----|---|-----------|-----------|-----------|
| 25 | 1 | 1.986126  | 5.873927  | -1.566865 |
| 26 | 1 | 2.562584  | 4.680342  | -2.745241 |
| 27 | 1 | 3.534257  | 5.044136  | -1.317555 |
| 28 | 6 | 1.760172  | -2.900611 | 1.588866  |
| 29 | 6 | -0.865772 | -1.794335 | 2.908885  |
| 30 | 6 | -3.228181 | -2.058937 | 0.763204  |
| 31 | 6 | -1.951656 | -3.090422 | -1.957234 |
| 32 | 6 | 1.126320  | -3.581354 | -1.495205 |
| 33 | 1 | 1.651488  | -3.894990 | 2.046985  |
| 34 | 1 | 1.960070  | -2.190808 | 2.394886  |
| 35 | 1 | 2.642032  | -2.927133 | 0.945139  |
| 36 | 1 | -0.864250 | -2.736657 | 3.476255  |
| 37 | 1 | -1.809412 | -1.285767 | 3.118968  |
| 38 | 1 | -0.054863 | -1.176398 | 3.309010  |
| 39 | 1 | -3.636073 | -3.041223 | 1.043107  |
| 40 | 1 | -3.786292 | -1.707304 | -0.108385 |
| 41 | 1 | -3.434710 | -1.367083 | 1.582458  |
| 42 | 1 | -2.200006 | -4.160977 | -1.905670 |
| 43 | 1 | -1.366535 | -2.920474 | -2.864742 |
| 44 | 1 | -2.891047 | -2.538737 | -2.058779 |
| 45 | 1 | 0.884333  | -4.650523 | -1.580682 |
| 46 | 1 | 2.173275  | -3.502505 | -1.189840 |
| 47 | 1 | 1.029077  | -3.138276 | -2.491831 |
| 48 | 6 | -2.892468 | 1.147431  | 0.461041  |
| 49 | 6 | -3.228289 | 1.510365  | 1.789445  |
| 50 | 6 | -3.886789 | 1.155359  | -0.552779 |
| 51 | 6 | -4.564462 | 1.825867  | 2.092209  |
| 52 | 6 | -5.206211 | 1.485565  | -0.207517 |
| 53 | 6 | -5.551903 | 1.811732  | 1.106764  |
| 54 | 1 | -4.821902 | 2.091433  | 3.114019  |
| 55 | 1 | -5.966853 | 1.482092  | -0.983125 |
| 56 | 1 | -6.579334 | 2.056392  | 1.357428  |
| 57 | 6 | 2.965262  | -0.098454 | 0.560071  |
| 58 | 6 | 3.451963  | 0.097269  | 1.881152  |
| 59 | 6 | 3.792014  | -0.685156 | -0.425245 |
| 60 | 6 | 4.740403  | -0.346609 | 2.209699  |
| 61 | 6 | 5.077353  | -1.121843 | -0.047953 |
| 62 | 6 | 5.551308  | -0.964410 | 1.253495  |
| 63 | 1 | 5.104692  | -0.205067 | 3.222909  |
| 64 | 1 | 5.709237  | -1.583172 | -0.801626 |
| 65 | 1 | 6.544722  | -1.311066 | 1.519767  |
| 66 | 6 | -2.190212 | 1.610589  | 2.886519  |
| 67 | 1 | -1.313270 | 1.000467  | 2.667262  |
| 68 | 1 | -1.848035 | 2.647880  | 3.007796  |
| 69 | 1 | -2.605372 | 1.295504  | 3.850527  |
| 70 | 6 | -3.551536 | 0.829004  | -1.989343 |
| 71 | 1 | -2.986915 | 1.641278  | -2.465418 |
| 72 | 1 | -2.926169 | -0.063166 | -2.075065 |
| 73 | 1 | -4.464903 | 0.676189  | -2.572816 |
| 74 | 6 | 2.606905  | 0.782393  | 2.932798  |
| 75 | 1 | 3.095678  | 0.734425  | 3.910328  |
| 76 | 1 | 2.444610  | 1.841761  | 2.694569  |
| 77 | 1 | 1.614966  | 0.326544  | 3.016784  |
| 78 | 6 | 3.391767  | -0.816246 | -1.876436 |
| 79 | 1 | 3.842597  | -1.709526 | -2.321634 |
| 80 | 1 | 2.313316  | -0.867278 | -2.018511 |
| 81 | 1 | 3.750359  | 0.045081  | -2.457590 |

$^{25}\text{Ar}$  (E = -1504.1351264 a.u.)

| Center Number | Atomic Number | Coordinates (Angstroms) |   |   |
|---------------|---------------|-------------------------|---|---|
|               |               | X                       | Y | Z |

|    |    |           |           |           |
|----|----|-----------|-----------|-----------|
| 1  | 22 | -0.110491 | -0.868920 | -0.417226 |
| 2  | 7  | -1.493232 | 0.379517  | -0.039651 |
| 3  | 6  | -0.752145 | 1.489694  | -0.573863 |
| 4  | 7  | 1.385691  | 0.224855  | 0.043873  |
| 5  | 6  | -0.076255 | -2.409587 | 1.420183  |
| 6  | 6  | 0.934775  | -2.860812 | 0.519130  |
| 7  | 6  | -1.342706 | -2.564697 | 0.779468  |
| 8  | 17 | -0.063758 | -0.838804 | -2.794841 |
| 9  | 6  | 0.298376  | -3.257177 | -0.686020 |
| 10 | 6  | -1.108501 | -3.061906 | -0.529654 |
| 11 | 6  | 0.812435  | 1.442678  | -0.468551 |
| 12 | 6  | -0.001481 | 2.453320  | 0.334797  |
| 13 | 1  | -1.119854 | 1.903958  | -1.511430 |
| 14 | 6  | 0.280106  | 3.791274  | -0.268600 |
| 15 | 1  | -0.155910 | 2.344386  | 1.397489  |
| 16 | 6  | 1.538498  | 2.249625  | -1.551276 |
| 17 | 6  | 1.094872  | 3.681871  | -1.332682 |
| 18 | 1  | 2.623809  | 2.159764  | -1.423365 |
| 19 | 1  | 1.300304  | 1.879162  | -2.553406 |
| 20 | 6  | 1.577648  | 4.763496  | -2.260967 |
| 21 | 6  | -0.372478 | 5.025647  | 0.296745  |
| 22 | 1  | -0.069961 | 5.933095  | -0.234454 |
| 23 | 1  | -0.112906 | 5.153707  | 1.356905  |
| 24 | 1  | -1.467492 | 4.949367  | 0.243480  |
| 25 | 1  | 1.217990  | 5.754383  | -1.967210 |
| 26 | 1  | 1.245148  | 4.576517  | -3.291703 |
| 27 | 1  | 2.676490  | 4.794890  | -2.283292 |
| 28 | 6  | 2.380310  | -3.089595 | 0.881265  |
| 29 | 6  | 0.145641  | -2.102195 | 2.879642  |
| 30 | 6  | -2.688848 | -2.449090 | 1.446125  |
| 31 | 6  | -2.157525 | -3.450906 | -1.539723 |
| 32 | 6  | 0.950044  | -3.927093 | -1.867314 |
| 33 | 1  | 2.485108  | -4.066262 | 1.375635  |
| 34 | 1  | 2.760443  | -2.328860 | 1.567025  |
| 35 | 1  | 3.029798  | -3.095962 | 0.002593  |
| 36 | 1  | 0.116771  | -3.032780 | 3.465278  |
| 37 | 1  | -0.623843 | -1.439734 | 3.284391  |
| 38 | 1  | 1.119675  | -1.637276 | 3.053946  |
| 39 | 1  | -2.980931 | -3.429716 | 1.848866  |
| 40 | 1  | -3.470623 | -2.129648 | 0.752482  |
| 41 | 1  | -2.677077 | -1.741501 | 2.277564  |
| 42 | 1  | -2.349610 | -4.532575 | -1.493188 |
| 43 | 1  | -1.837979 | -3.210560 | -2.558144 |
| 44 | 1  | -3.106633 | -2.939012 | -1.355245 |
| 45 | 1  | 0.812131  | -5.016009 | -1.801679 |
| 46 | 1  | 2.025743  | -3.733129 | -1.906058 |
| 47 | 1  | 0.515894  | -3.586533 | -2.811163 |
| 48 | 6  | -2.864927 | 0.634371  | 0.296176  |
| 49 | 6  | -3.230128 | 0.950239  | 1.629594  |
| 50 | 6  | -3.860459 | 0.580593  | -0.717173 |
| 51 | 6  | -4.583368 | 1.176612  | 1.933177  |
| 52 | 6  | -5.200302 | 0.813904  | -0.368615 |
| 53 | 6  | -5.566943 | 1.108566  | 0.946634  |
| 54 | 1  | -4.859095 | 1.406726  | 2.958750  |
| 55 | 1  | -5.958894 | 0.763266  | -1.144449 |
| 56 | 1  | -6.608400 | 1.282251  | 1.198557  |
| 57 | 6  | 2.749245  | 0.244768  | 0.488414  |
| 58 | 6  | 3.073430  | 0.690703  | 1.796347  |
| 59 | 6  | 3.781094  | -0.200506 | -0.382727 |
| 60 | 6  | 4.414987  | 0.669086  | 2.214765  |
| 61 | 6  | 5.108784  | -0.196010 | 0.075021  |
| 62 | 6  | 5.431040  | 0.232936  | 1.364271  |
| 63 | 1  | 4.655069  | 1.001334  | 3.220893  |
| 64 | 1  | 5.893626  | -0.536573 | -0.594029 |



|    |   |           |           |           |
|----|---|-----------|-----------|-----------|
| 65 | 1 | 6.462464  | 0.224340  | 1.702282  |
| 66 | 6 | -2.214045 | 1.057851  | 2.745575  |
| 67 | 1 | -1.281161 | 0.558205  | 2.483400  |
| 68 | 1 | -1.977650 | 2.107400  | 2.966767  |
| 69 | 1 | -2.601032 | 0.616088  | 3.671259  |
| 70 | 6 | -3.513857 | 0.303730  | -2.162417 |
| 71 | 1 | -3.122918 | 1.202379  | -2.659248 |
| 72 | 1 | -2.742697 | -0.461742 | -2.265764 |
| 73 | 1 | -4.403520 | -0.011644 | -2.716911 |
| 74 | 6 | 2.024735  | 1.200655  | 2.759068  |
| 75 | 1 | 2.339473  | 1.036872  | 3.795141  |
| 76 | 1 | 1.862406  | 2.278809  | 2.633313  |
| 77 | 1 | 1.063790  | 0.707003  | 2.604209  |
| 78 | 6 | 3.494231  | -0.681709 | -1.787405 |
| 79 | 1 | 4.410654  | -1.057206 | -2.253421 |
| 80 | 1 | 2.746650  | -1.478434 | -1.807281 |
| 81 | 1 | 3.094501  | 0.114536  | -2.423512 |

**1**<sup>1-Ad</sup> (E = -1180.8042688 a.u.)

| Center Number | Atomic Number | Coordinates (Angstroms) |           |           |
|---------------|---------------|-------------------------|-----------|-----------|
|               |               | X                       | Y         | Z         |
| 1             | 22            | 1.665260                | 0.293218  | 0.132788  |
| 2             | 7             | -1.619514               | 0.066213  | -0.106170 |
| 3             | 6             | 3.612759                | -1.132837 | -0.201479 |
| 4             | 6             | 2.739307                | -1.457365 | -1.276079 |
| 5             | 6             | 2.965983                | -1.524659 | 1.012832  |
| 6             | 17            | 1.312672                | 0.670788  | 2.528517  |
| 7             | 6             | 1.543027                | -1.998203 | -0.730233 |
| 8             | 6             | 1.691641                | -2.060549 | 0.687904  |
| 9             | 6             | -0.456336               | 0.131855  | -0.057647 |
| 10            | 6             | 1.522916                | 1.232527  | -1.926681 |
| 11            | 6             | 2.566708                | 1.915951  | -1.208429 |
| 12            | 1             | 0.568962                | 1.728452  | -2.081926 |
| 13            | 6             | 0.806044                | 2.667298  | 0.265440  |
| 14            | 6             | 2.159057                | 2.648908  | -0.056421 |
| 15            | 1             | 0.491953                | 3.032489  | 1.233314  |
| 16            | 1             | 0.044943                | 2.623740  | -0.498229 |
| 17            | 6             | 3.172704                | 3.298164  | 0.868866  |
| 18            | 6             | 3.965289                | 2.074399  | -1.774217 |
| 19            | 1             | 4.749514                | 2.059715  | -1.011733 |
| 20            | 1             | 4.035236                | 3.040371  | -2.298241 |
| 21            | 1             | 4.185876                | 1.296788  | -2.509097 |
| 22            | 1             | 3.499456                | 4.259658  | 0.447055  |
| 23            | 1             | 4.066621                | 2.683377  | 1.018525  |
| 24            | 1             | 2.725162                | 3.491872  | 1.847082  |
| 25            | 6             | 3.103263                | -1.501279 | -2.737762 |
| 26            | 6             | 5.075244                | -0.770169 | -0.301180 |
| 27            | 6             | 3.637024                | -1.567374 | 2.361774  |
| 28            | 6             | 0.723260                | -2.679548 | 1.662173  |
| 29            | 6             | 0.412505                | -2.583589 | -1.540689 |
| 30            | 1             | 3.560520                | -2.474312 | -2.971140 |
| 31            | 1             | 3.825398                | -0.729783 | -3.017581 |
| 32            | 1             | 2.226536                | -1.391825 | -3.383391 |
| 33            | 1             | 5.696439                | -1.658129 | -0.112285 |
| 34            | 1             | 5.366347                | -0.012234 | 0.434631  |
| 35            | 1             | 5.337176                | -0.392285 | -1.291968 |
| 36            | 1             | 4.290112                | -2.451118 | 2.422856  |
| 37            | 1             | 2.907953                | -1.621840 | 3.172175  |
| 38            | 1             | 4.257457                | -0.683272 | 2.539949  |
| 39            | 1             | 0.998851                | -3.723649 | 1.869719  |
| 40            | 1             | -0.299460               | -2.679737 | 1.271955  |
| 41            | 1             | 0.716753                | -2.133843 | 2.609923  |
| 42            | 1             | 0.686662                | -3.580023 | -1.916283 |
| 43            | 1             | 0.167889                | -1.960204 | -2.407394 |
| 44            | 1             | -0.496865               | -2.696703 | -0.943865 |

|    |   |           |           |           |
|----|---|-----------|-----------|-----------|
| 45 | 1 | 1.836548  | 0.676337  | -2.801481 |
| 46 | 6 | -3.066727 | 0.061069  | -0.101889 |
| 47 | 6 | -3.574685 | 1.339232  | 0.622026  |
| 48 | 6 | -3.586897 | 0.049088  | -1.565380 |
| 49 | 6 | -3.579514 | -1.200219 | 0.645438  |
| 50 | 6 | -5.123353 | 1.336370  | 0.626886  |
| 51 | 1 | -3.182048 | 1.356478  | 1.645857  |
| 52 | 1 | -3.191526 | 2.226477  | 0.102518  |
| 53 | 6 | -5.135764 | 0.051666  | -1.552797 |
| 54 | 1 | -3.202990 | 0.930364  | -2.094458 |
| 55 | 1 | -3.206416 | -0.842054 | -2.080389 |
| 56 | 6 | -5.128256 | -1.193384 | 0.649919  |
| 57 | 1 | -3.199730 | -2.099652 | 0.143947  |
| 58 | 1 | -3.188774 | -1.197886 | 1.670372  |
| 59 | 6 | -5.636542 | 0.079199  | 1.372067  |
| 60 | 6 | -5.644768 | 1.324621  | -0.831587 |
| 61 | 1 | -5.474997 | 2.240580  | 1.139352  |
| 62 | 6 | -5.649078 | -1.206316 | -0.808786 |
| 63 | 1 | -5.496599 | 0.042968  | -2.589060 |
| 64 | 1 | -5.483580 | -2.086771 | 1.178724  |
| 65 | 1 | -6.734262 | 0.081456  | 1.397858  |
| 66 | 1 | -5.287269 | 0.088027  | 2.413437  |
| 67 | 1 | -6.742596 | 1.343710  | -0.837119 |
| 68 | 1 | -5.302245 | 2.223061  | -1.362976 |
| 69 | 1 | -6.746937 | -1.221928 | -0.814172 |
| 70 | 1 | -5.309490 | -2.115500 | -1.323789 |

TS1<sup>1-Ad</sup>-3<sup>1-Ad</sup> (E = -1180.7948007 a.u.)

| Center Number | Atomic Number | Coordinates (Angstroms) |           |           |
|---------------|---------------|-------------------------|-----------|-----------|
|               |               | X                       | Y         | Z         |
| 1             | 22            | -1.117491               | -0.597113 | -0.560009 |
| 2             | 7             | -3.250909               | 1.258129  | -2.065919 |
| 3             | 6             | 1.265343                | -0.862212 | -0.997561 |
| 4             | 6             | 1.130554                | -0.263042 | 0.280698  |
| 5             | 6             | 0.731012                | 0.037348  | -1.966417 |
| 6             | 17            | -1.413838               | -2.286902 | -2.277530 |
| 7             | 6             | 0.517483                | 1.019860  | 0.105749  |
| 8             | 6             | 0.275143                | 1.202460  | -1.285083 |
| 9             | 6             | -2.672248               | 0.445002  | -1.376710 |
| 10            | 6             | -1.763481               | -0.146891 | 1.536768  |
| 11            | 6             | -2.003785               | -1.555777 | 1.415285  |
| 12            | 1             | -2.602471               | 0.540530  | 1.450191  |
| 13            | 6             | -3.572063               | -0.890039 | -0.344203 |
| 14            | 6             | -2.856884               | -1.947077 | 0.384706  |
| 15            | 1             | -4.206455               | -1.283202 | -1.131403 |
| 16            | 1             | -4.084029               | -0.175308 | 0.297829  |
| 17            | 6             | -3.228905               | -3.391032 | 0.129764  |
| 18            | 6             | -1.331541               | -2.560659 | 2.332646  |
| 19            | 1             | -0.917423               | -3.420067 | 1.795080  |
| 20            | 1             | -2.063266               | -2.948037 | 3.055875  |
| 21            | 1             | -0.526242               | -2.090141 | 2.902165  |
| 22            | 1             | -4.053067               | -3.684857 | 0.797738  |
| 23            | 1             | -2.394480               | -4.075874 | 0.305615  |
| 24            | 1             | -3.558675               | -3.530022 | -0.902217 |
| 25            | 6             | 1.715221                | -0.793630 | 1.566014  |
| 26            | 6             | 1.936169                | -2.178178 | -1.298755 |
| 27            | 6             | 0.791520                | -0.127093 | -3.461828 |
| 28            | 6             | -0.175835               | 2.485346  | -1.936067 |
| 29            | 6             | 0.400361                | 2.110972  | 1.141147  |
| 30            | 1             | 2.753084                | -0.448970 | 1.680525  |
| 31            | 1             | 1.730873                | -1.887684 | 1.588429  |
| 32            | 1             | 1.161859                | -0.448294 | 2.444545  |
| 33            | 1             | 2.987918                | -2.015880 | -1.575328 |
| 34            | 1             | 1.443763                | -2.694728 | -2.127151 |
| 35            | 1             | 1.923488                | -2.848493 | -0.433129 |

|    |   |           |           |           |
|----|---|-----------|-----------|-----------|
| 36 | 1 | 1.711272  | 0.330730  | -3.855230 |
| 37 | 1 | -0.058279 | 0.354753  | -3.955571 |
| 38 | 1 | 0.783861  | -1.180480 | -3.750043 |
| 39 | 1 | 0.696288  | 3.106967  | -2.186553 |
| 40 | 1 | -0.822610 | 3.069062  | -1.274536 |
| 41 | 1 | -0.734634 | 2.300140  | -2.856823 |
| 42 | 1 | 1.189329  | 2.861194  | 0.987050  |
| 43 | 1 | 0.513017  | 1.724140  | 2.157572  |
| 44 | 1 | -0.562605 | 2.630413  | 1.086332  |
| 45 | 1 | -1.052494 | 0.159678  | 2.293007  |
| 46 | 6 | -4.614517 | 1.647003  | -2.471725 |
| 47 | 6 | -5.586760 | 1.780124  | -1.268175 |
| 48 | 6 | -4.512333 | 3.019139  | -3.189893 |
| 49 | 6 | -5.169085 | 0.595117  | -3.473829 |
| 50 | 6 | -6.982497 | 2.228479  | -1.775148 |
| 51 | 1 | -5.678804 | 0.820282  | -0.748795 |
| 52 | 1 | -5.184372 | 2.510759  | -0.553587 |
| 53 | 6 | -5.904110 | 3.466083  | -3.694881 |
| 54 | 1 | -4.099618 | 3.759765  | -2.492021 |
| 55 | 1 | -3.807592 | 2.929336  | -4.026227 |
| 56 | 6 | -6.567080 | 1.042042  | -3.971484 |
| 57 | 1 | -4.472810 | 0.495630  | -4.315729 |
| 58 | 1 | -5.235051 | -0.384846 | -2.985337 |
| 59 | 6 | -7.530239 | 1.170353  | -2.765256 |
| 60 | 6 | -6.867977 | 3.596316  | -2.490161 |
| 61 | 1 | -7.659537 | 2.315162  | -0.915124 |
| 62 | 6 | -6.452095 | 2.410639  | -4.687040 |
| 63 | 1 | -5.809839 | 4.435810  | -4.200752 |
| 64 | 1 | -6.949838 | 0.288573  | -4.672132 |
| 65 | 1 | -8.529655 | 1.464609  | -3.113045 |
| 66 | 1 | -7.636375 | 0.199596  | -2.260785 |
| 67 | 1 | -7.858758 | 3.924417  | -2.832616 |
| 68 | 1 | -6.497703 | 4.358711  | -1.790709 |
| 69 | 1 | -7.436657 | 2.721259  | -5.062247 |
| 70 | 1 | -5.785049 | 2.327429  | -5.556017 |

$3^{1-Ad}$  (E = -1180.8329783 a.u.)

| Center Number | Atomic Number | Coordinates (Angstroms) |           |           |
|---------------|---------------|-------------------------|-----------|-----------|
|               |               | X                       | Y         | Z         |
| 1             | 22            | -1.343024               | -0.047816 | -0.274137 |
| 2             | 7             | 0.617081                | -0.009212 | 0.347564  |
| 3             | 6             | -2.161643               | -2.294593 | -0.111258 |
| 4             | 6             | -3.245209               | -1.477417 | -0.552430 |
| 5             | 6             | -1.810982               | -1.887513 | 1.205811  |
| 6             | 17            | -0.881326               | -0.064272 | -2.576833 |
| 7             | 6             | -3.561409               | -0.563927 | 0.491661  |
| 8             | 6             | -2.658887               | -0.804283 | 1.575201  |
| 9             | 6             | -0.048064               | 0.877016  | 0.955207  |
| 10            | 6             | -2.091106               | 2.007578  | -0.174527 |
| 11            | 6             | -1.072618               | 3.100297  | -0.319653 |
| 12            | 1             | -2.568991               | 2.069607  | 0.806889  |
| 13            | 6             | 0.209070                | 2.181758  | 1.624740  |
| 14            | 6             | -0.041213               | 3.246033  | 0.543940  |
| 15            | 1             | 1.223930                | 2.282066  | 2.021946  |
| 16            | 1             | -0.486191               | 2.297092  | 2.465983  |
| 17            | 6             | 0.953039                | 4.387743  | 0.574737  |
| 18            | 6             | -1.309518               | 4.028269  | -1.497554 |
| 19            | 1             | -0.495109               | 4.734143  | -1.678082 |
| 20            | 1             | -2.236886               | 4.601728  | -1.358701 |
| 21            | 1             | -1.440148               | 3.426814  | -2.406878 |
| 22            | 1             | 0.932983                | 4.889998  | 1.553650  |
| 23            | 1             | 0.751022                | 5.145840  | -0.184907 |
| 24            | 1             | 1.983082                | 4.029980  | 0.426187  |
| 25            | 6             | -3.990602               | -1.634269 | -1.853937 |
| 26            | 6             | -1.559032               | -3.436974 | -0.890869 |

|    |   |           |           |           |
|----|---|-----------|-----------|-----------|
| 27 | 6 | -0.787030 | -2.541010 | 2.099270  |
| 28 | 6 | -2.725033 | -0.152505 | 2.934084  |
| 29 | 6 | -4.755824 | 0.354697  | 0.523772  |
| 30 | 1 | -4.763342 | -2.411223 | -1.762814 |
| 31 | 1 | -3.319961 | -1.919823 | -2.669405 |
| 32 | 1 | -4.488530 | -0.705313 | -2.148684 |
| 33 | 1 | -2.167931 | -4.344959 | -0.774292 |
| 34 | 1 | -0.546551 | -3.673454 | -0.549692 |
| 35 | 1 | -1.504549 | -3.207958 | -1.959581 |
| 36 | 1 | -1.268264 | -3.282445 | 2.752600  |
| 37 | 1 | -0.283611 | -1.813133 | 2.743741  |
| 38 | 1 | -0.017670 | -3.061744 | 1.521853  |
| 39 | 1 | -3.493102 | -0.633317 | 3.556779  |
| 40 | 1 | -2.979494 | 0.910502  | 2.865735  |
| 41 | 1 | -1.772484 | -0.233107 | 3.467402  |
| 42 | 1 | -5.641720 | -0.190701 | 0.879013  |
| 43 | 1 | -4.991881 | 0.755733  | -0.467080 |
| 44 | 1 | -4.602027 | 1.203949  | 1.195710  |
| 45 | 1 | -2.871728 | 2.097165  | -0.936971 |
| 46 | 6 | 2.072679  | -0.274285 | 0.168246  |
| 47 | 6 | 2.704935  | 0.864877  | -0.678644 |
| 48 | 6 | 2.795270  | -0.365312 | 1.538511  |
| 49 | 6 | 2.239364  | -1.615556 | -0.585748 |
| 50 | 6 | 4.209962  | 0.569724  | -0.900075 |
| 51 | 1 | 2.177330  | 0.936762  | -1.636916 |
| 52 | 1 | 2.580604  | 1.823240  | -0.160253 |
| 53 | 6 | 4.301066  | -0.657436 | 1.311453  |
| 54 | 1 | 2.676368  | 0.575528  | 2.089998  |
| 55 | 1 | 2.338326  | -1.162416 | 2.139981  |
| 56 | 6 | 3.741811  | -1.912401 | -0.811191 |
| 57 | 1 | 1.778550  | -2.421204 | 0.001311  |
| 58 | 1 | 1.706792  | -1.558149 | -1.542346 |
| 59 | 6 | 4.369475  | -0.773898 | -1.652796 |
| 60 | 6 | 4.926393  | 0.483499  | 0.470517  |
| 61 | 1 | 4.647101  | 1.381820  | -1.495760 |
| 62 | 6 | 4.460586  | -2.000812 | 0.557979  |
| 63 | 1 | 4.803464  | -0.716986 | 2.286007  |
| 64 | 1 | 3.844053  | -2.866102 | -1.345215 |
| 65 | 1 | 5.433624  | -0.980261 | -1.831048 |
| 66 | 1 | 3.879986  | -0.716553 | -2.634416 |
| 67 | 1 | 5.998380  | 0.294789  | 0.323044  |
| 68 | 1 | 4.837255  | 1.439920  | 1.005029  |
| 69 | 1 | 5.526160  | -2.223370 | 0.410893  |
| 70 | 1 | 4.037773  | -2.821214 | 1.154834  |

$4^{1-Ad}$  (E = -1180.8215966 a.u.)

| Center Number | Atomic Number | Coordinates (Angstroms) |           |           |
|---------------|---------------|-------------------------|-----------|-----------|
|               |               | X                       | Y         | Z         |
| 1             | 22            | -1.243098               | -0.154284 | -0.202031 |
| 2             | 7             | 0.795296                | 0.245024  | -0.178282 |
| 3             | 6             | -3.246037               | -1.521881 | 0.243430  |
| 4             | 6             | -2.429965               | -1.523619 | 1.408952  |
| 5             | 6             | -2.532150               | -2.187654 | -0.791150 |
| 6             | 17            | -1.994055               | 0.553897  | -2.320213 |
| 7             | 6             | -1.195100               | -2.158729 | 1.082650  |
| 8             | 6             | -1.261928               | -2.573363 | -0.282406 |
| 9             | 6             | 0.097163                | 1.300307  | -0.265108 |
| 10            | 6             | -1.974408               | 1.428343  | 1.147296  |
| 11            | 6             | -2.030363               | 2.858062  | 0.662926  |
| 12            | 1             | -1.298280               | 1.333339  | 2.010324  |
| 13            | 6             | 0.282102                | 2.768296  | -0.278171 |
| 14            | 6             | -1.005472               | 3.497402  | 0.066219  |
| 15            | 1             | 1.106813                | 3.073852  | 0.382695  |
| 16            | 1             | 0.597305                | 3.058303  | -1.291016 |
| 17            | 6             | -0.971731               | 4.954798  | -0.345367 |

|    |   |           |           |           |
|----|---|-----------|-----------|-----------|
| 18 | 6 | -3.375098 | 3.520134  | 0.918612  |
| 19 | 1 | -3.459995 | 4.527586  | 0.505167  |
| 20 | 1 | -3.583377 | 3.573383  | 1.996698  |
| 21 | 1 | -4.171853 | 2.909993  | 0.471109  |
| 22 | 1 | -1.847675 | 5.519511  | -0.021184 |
| 23 | 1 | -0.894231 | 5.049836  | -1.439430 |
| 24 | 1 | -0.086010 | 5.453329  | 0.076996  |
| 25 | 6 | -2.851622 | -1.145875 | 2.806579  |
| 26 | 6 | -4.653551 | -0.992507 | 0.131064  |
| 27 | 6 | -3.074055 | -2.545086 | -2.149639 |
| 28 | 6 | -0.275318 | -3.439022 | -1.030455 |
| 29 | 6 | -0.144384 | -2.526083 | 2.104235  |
| 30 | 1 | -3.118146 | -2.050542 | 3.372025  |
| 31 | 1 | -3.727068 | -0.490748 | 2.809690  |
| 32 | 1 | -2.054159 | -0.637603 | 3.359621  |
| 33 | 1 | -5.389109 | -1.792838 | 0.295959  |
| 34 | 1 | -4.841541 | -0.569666 | -0.861483 |
| 35 | 1 | -4.852327 | -0.207974 | 0.868329  |
| 36 | 1 | -3.614841 | -3.501829 | -2.100654 |
| 37 | 1 | -2.274751 | -2.650211 | -2.889428 |
| 38 | 1 | -3.765740 | -1.784789 | -2.522161 |
| 39 | 1 | -0.707756 | -4.432572 | -1.213400 |
| 40 | 1 | 0.648864  | -3.582521 | -0.466333 |
| 41 | 1 | -0.008159 | -3.016818 | -2.006238 |
| 42 | 1 | -0.527587 | -3.307435 | 2.776208  |
| 43 | 1 | 0.142393  | -1.673747 | 2.731193  |
| 44 | 1 | 0.762549  | -2.915112 | 1.635416  |
| 45 | 1 | -2.962610 | 1.140871  | 1.507321  |
| 46 | 6 | 2.282527  | 0.076791  | -0.082000 |
| 47 | 6 | 2.657770  | -1.386284 | -0.407590 |
| 48 | 6 | 3.007778  | 1.010310  | -1.089679 |
| 49 | 6 | 2.745371  | 0.414882  | 1.361673  |
| 50 | 6 | 4.189199  | -1.585355 | -0.291581 |
| 51 | 1 | 2.141796  | -2.055434 | 0.287850  |
| 52 | 1 | 2.313624  | -1.632884 | -1.420135 |
| 53 | 6 | 4.541644  | 0.817672  | -0.972849 |
| 54 | 1 | 2.667652  | 0.779583  | -2.108077 |
| 55 | 1 | 2.756935  | 2.056768  | -0.886244 |
| 56 | 6 | 4.279771  | 0.223789  | 1.473460  |
| 57 | 1 | 2.473710  | 1.450100  | 1.606240  |
| 58 | 1 | 2.225839  | -0.239282 | 2.073784  |
| 59 | 6 | 4.642274  | -1.246788 | 1.150495  |
| 60 | 6 | 4.908319  | -0.650777 | -1.293585 |
| 61 | 1 | 4.432902  | -2.631289 | -0.519490 |
| 62 | 6 | 4.992705  | 1.162422  | 0.468614  |
| 63 | 1 | 5.038466  | 1.488551  | -1.685797 |
| 64 | 1 | 4.595734  | 0.467552  | 2.496275  |
| 65 | 1 | 5.725945  | -1.395966 | 1.248988  |
| 66 | 1 | 4.156121  | -1.922201 | 1.868412  |
| 67 | 1 | 5.995697  | -0.790766 | -1.226959 |
| 68 | 1 | 4.611442  | -0.898600 | -2.322010 |
| 69 | 1 | 6.081427  | 1.048770  | 0.558209  |
| 70 | 1 | 4.757376  | 2.211235  | 0.698063  |

TS4<sup>1-Ad</sup>-5<sup>1-Ad</sup> (E = -1180.804138a.u.)

| Center Number | Atomic Number | Coordinates (Angstroms) |           |           |
|---------------|---------------|-------------------------|-----------|-----------|
|               |               | X                       | Y         | Z         |
| 1             | 22            | 0.733719                | 0.011694  | -0.757308 |
| 2             | 7             | -0.474291               | 1.546448  | -0.466235 |
| 3             | 6             | 2.815680                | -1.241918 | -0.725139 |
| 4             | 6             | 2.497445                | -0.860652 | 0.606581  |
| 5             | 6             | 3.079931                | -0.054711 | -1.471945 |
| 6             | 17            | 0.237302                | -1.101138 | -2.795440 |
| 7             | 6             | 2.551732                | 0.565644  | 0.680593  |
| 8             | 6             | 2.930446                | 1.060847  | -0.606047 |

|    |   |           |           |           |
|----|---|-----------|-----------|-----------|
| 9  | 6 | -1.141421 | 0.412212  | -0.585351 |
| 10 | 6 | -0.775089 | -0.960714 | 0.769796  |
| 11 | 6 | -2.195640 | -1.460562 | 0.823973  |
| 12 | 1 | -0.449005 | -0.528578 | 1.722236  |
| 13 | 6 | -2.553174 | 0.096857  | -0.971382 |
| 14 | 6 | -3.076460 | -0.985820 | -0.067079 |
| 15 | 1 | -3.202607 | 0.976542  | -0.916918 |
| 16 | 1 | -2.554675 | -0.229604 | -2.020882 |
| 17 | 6 | -4.512248 | -1.404857 | -0.262103 |
| 18 | 6 | -2.471792 | -2.520689 | 1.868664  |
| 19 | 1 | -3.518712 | -2.836222 | 1.886015  |
| 20 | 1 | -2.215521 | -2.148213 | 2.870221  |
| 21 | 1 | -1.852002 | -3.411198 | 1.693077  |
| 22 | 1 | -4.822619 | -2.189888 | 0.431796  |
| 23 | 1 | -4.667627 | -1.778629 | -1.283994 |
| 24 | 1 | -5.190499 | -0.549807 | -0.130208 |
| 25 | 6 | 2.337236  | -1.784689 | 1.789299  |
| 26 | 6 | 2.966266  | -2.649543 | -1.244762 |
| 27 | 6 | 3.553754  | -0.007733 | -2.902207 |
| 28 | 6 | 3.317447  | 2.476954  | -0.961844 |
| 29 | 6 | 2.469171  | 1.346159  | 1.972229  |
| 30 | 1 | 3.301891  | -1.918513 | 2.299694  |
| 31 | 1 | 1.987111  | -2.778150 | 1.490428  |
| 32 | 1 | 1.631516  | -1.391561 | 2.528991  |
| 33 | 1 | 4.020966  | -2.959216 | -1.217564 |
| 34 | 1 | 2.617719  | -2.730249 | -2.278568 |
| 35 | 1 | 2.396844  | -3.368147 | -0.646194 |
| 36 | 1 | 4.631782  | -0.217827 | -2.959019 |
| 37 | 1 | 3.384949  | 0.976981  | -3.349907 |
| 38 | 1 | 3.033673  | -0.746671 | -3.519272 |
| 39 | 1 | 4.406250  | 2.547563  | -1.094337 |
| 40 | 1 | 3.035454  | 3.183963  | -0.178667 |
| 41 | 1 | 2.853622  | 2.812179  | -1.896233 |
| 42 | 1 | 3.327038  | 1.104109  | 2.615549  |
| 43 | 1 | 1.562190  | 1.117986  | 2.544463  |
| 44 | 1 | 2.486645  | 2.424256  | 1.795754  |
| 45 | 1 | -0.131261 | -1.830482 | 0.580560  |
| 46 | 6 | -0.985641 | 2.905250  | -0.149237 |
| 47 | 6 | -1.917399 | 2.866918  | 1.094981  |
| 48 | 6 | 0.198746  | 3.853764  | 0.149362  |
| 49 | 6 | -1.766846 | 3.484343  | -1.367130 |
| 50 | 6 | -2.438496 | 4.291452  | 1.412303  |
| 51 | 1 | -2.761638 | 2.190697  | 0.914043  |
| 52 | 1 | -1.357172 | 2.466640  | 1.951106  |
| 53 | 6 | -0.310078 | 5.279180  | 0.478066  |
| 54 | 1 | 0.773257  | 3.457139  | 0.993770  |
| 55 | 1 | 0.862616  | 3.880866  | -0.722206 |
| 56 | 6 | -2.289859 | 4.905522  | -1.039540 |
| 57 | 1 | -1.097212 | 3.510273  | -2.236962 |
| 58 | 1 | -2.607051 | 2.830015  | -1.624485 |
| 59 | 6 | -3.224018 | 4.838909  | 0.194573  |
| 60 | 6 | -1.240043 | 5.223343  | 1.714727  |
| 61 | 1 | -3.100494 | 4.243814  | 2.287319  |
| 62 | 6 | -1.094619 | 5.839125  | -0.732543 |
| 63 | 1 | 0.550729  | 5.926806  | 0.692415  |
| 64 | 1 | -2.847519 | 5.289380  | -1.904160 |
| 65 | 1 | -3.617774 | 5.839011  | 0.421808  |
| 66 | 1 | -4.087424 | 4.193005  | -0.019404 |
| 67 | 1 | -1.599385 | 6.231655  | 1.961925  |
| 68 | 1 | -0.685862 | 4.853498  | 2.588991  |
| 69 | 1 | -1.454152 | 6.853828  | -0.513123 |
| 70 | 1 | -0.436516 | 5.910400  | -1.609687 |

5<sup>1-Ad</sup> (E = -1180.8279474 a.u.)

Center Number      Atomic Number      Coordinates (Angstroms)

|    |    | X         | Y         | Z         |
|----|----|-----------|-----------|-----------|
| 1  | 22 | -1.255046 | -0.190850 | -0.146231 |
| 2  | 7  | 0.614732  | 0.187632  | 0.169316  |
| 3  | 6  | -3.282175 | -1.479840 | 0.024849  |
| 4  | 6  | -2.629205 | -1.466693 | 1.289376  |
| 5  | 6  | -2.450168 | -2.189224 | -0.886754 |
| 6  | 17 | -2.069851 | 0.771133  | -2.138044 |
| 7  | 6  | -1.398810 | -2.182619 | 1.158833  |
| 8  | 6  | -1.288475 | -2.633065 | -0.191283 |
| 9  | 6  | 0.025838  | 1.434815  | 0.133372  |
| 10 | 6  | -0.959742 | 1.819943  | 1.190936  |
| 11 | 6  | -1.355755 | 3.238293  | 0.857011  |
| 12 | 1  | -0.641756 | 1.650594  | 2.226212  |
| 13 | 6  | 0.294614  | 2.649135  | -0.738809 |
| 14 | 6  | -0.665851 | 3.687330  | -0.203366 |
| 15 | 1  | 1.327573  | 3.014444  | -0.651316 |
| 16 | 1  | 0.120723  | 2.444716  | -1.801353 |
| 17 | 6  | -0.754022 | 5.036213  | -0.864074 |
| 18 | 6  | -2.404979 | 3.943426  | 1.673914  |
| 19 | 1  | -2.557707 | 4.975532  | 1.345378  |
| 20 | 1  | -2.127898 | 3.965667  | 2.737293  |
| 21 | 1  | -3.371501 | 3.424050  | 1.604863  |
| 22 | 1  | -1.448963 | 5.708548  | -0.352339 |
| 23 | 1  | -1.087664 | 4.933617  | -1.905702 |
| 24 | 1  | 0.231306  | 5.522269  | -0.890262 |
| 25 | 6  | -3.199284 | -0.954643 | 2.592401  |
| 26 | 6  | -4.644181 | -0.912206 | -0.287147 |
| 27 | 6  | -2.799094 | -2.539702 | -2.310127 |
| 28 | 6  | -0.298019 | -3.627104 | -0.751885 |
| 29 | 6  | -0.525827 | -2.572775 | 2.327941  |
| 30 | 1  | -3.708319 | -1.765694 | 3.133100  |
| 31 | 1  | -3.932883 | -0.157976 | 2.431810  |
| 32 | 1  | -2.419251 | -0.564180 | 3.255729  |
| 33 | 1  | -5.413908 | -1.694128 | -0.216754 |
| 34 | 1  | -4.680491 | -0.495899 | -1.298346 |
| 35 | 1  | -4.921597 | -0.114745 | 0.410139  |
| 36 | 1  | -3.383661 | -3.471010 | -2.341439 |
| 37 | 1  | -1.902006 | -2.690751 | -2.919078 |
| 38 | 1  | -3.391132 | -1.752290 | -2.784299 |
| 39 | 1  | -0.804184 | -4.577900 | -0.971279 |
| 40 | 1  | 0.505475  | -3.842050 | -0.043484 |
| 41 | 1  | 0.161479  | -3.282078 | -1.684941 |
| 42 | 1  | -1.074291 | -3.253803 | 2.994120  |
| 43 | 1  | -0.215875 | -1.709370 | 2.927381  |
| 44 | 1  | 0.379161  | -3.089062 | 2.000925  |
| 45 | 1  | -1.923100 | 1.152684  | 1.147138  |
| 46 | 6  | 2.075633  | -0.038361 | 0.080048  |
| 47 | 6  | 2.603213  | 0.254238  | -1.358785 |
| 48 | 6  | 2.824445  | 0.875395  | 1.093428  |
| 49 | 6  | 2.409606  | -1.509549 | 0.420809  |
| 50 | 6  | 4.132169  | 0.015698  | -1.432377 |
| 51 | 1  | 2.076018  | -0.400275 | -2.065791 |
| 52 | 1  | 2.375593  | 1.287698  | -1.640693 |
| 53 | 6  | 4.352655  | 0.635896  | 1.011415  |
| 54 | 1  | 2.598394  | 1.928145  | 0.883670  |
| 55 | 1  | 2.458179  | 0.658940  | 2.106786  |
| 56 | 6  | 3.936120  | -1.762310 | 0.345732  |
| 57 | 1  | 2.042895  | -1.734440 | 1.428829  |
| 58 | 1  | 1.886319  | -2.166711 | -0.280294 |
| 59 | 6  | 4.442640  | -1.459545 | -1.085025 |
| 60 | 6  | 4.848854  | 0.946504  | -0.422678 |
| 61 | 1  | 4.481116  | 0.237770  | -2.449985 |
| 62 | 6  | 4.662645  | -0.841030 | 1.355225  |
| 63 | 1  | 4.859039  | 1.296832  | 1.727991  |

|    |   |          |           |           |
|----|---|----------|-----------|-----------|
| 64 | 1 | 4.137801 | -2.813301 | 0.594266  |
| 65 | 1 | 5.523797 | -1.644834 | -1.149995 |
| 66 | 1 | 3.954710 | -2.127718 | -1.808573 |
| 67 | 1 | 5.936256 | 0.800788  | -0.483208 |
| 68 | 1 | 4.649474 | 1.998494  | -0.671784 |
| 69 | 1 | 5.746311 | -1.018587 | 1.316927  |
| 70 | 1 | 4.332847 | -1.067311 | 2.379114  |

$10^{1\text{-Ad}}$  (E = -1663.7445409 a.u.)

| Center Number | Atomic Number | Coordinates (Angstroms) |           |           |
|---------------|---------------|-------------------------|-----------|-----------|
|               |               | X                       | Y         | Z         |
| 1             | 22            | -0.033284               | 1.198864  | 0.225779  |
| 2             | 7             | 1.513427                | 0.145074  | 0.126369  |
| 3             | 6             | 1.152852                | 0.005169  | 1.468072  |
| 4             | 7             | -1.467463               | -0.628873 | 0.559375  |
| 5             | 6             | 0.909280                | 3.158859  | 1.191516  |
| 6             | 6             | -0.026345               | 2.640016  | 2.138866  |
| 7             | 6             | 0.175897                | 3.607281  | 0.059087  |
| 8             | 17            | -0.392790               | 1.207524  | -2.177904 |
| 9             | 6             | -1.335537               | 2.787588  | 1.590073  |
| 10            | 6             | -1.210927               | 3.387622  | 0.307322  |
| 11            | 6             | -0.845722               | -1.539733 | 1.219353  |
| 12            | 6             | 0.384171                | -1.192712 | 2.029391  |
| 13            | 1             | 1.818903                | 0.441656  | 2.215839  |
| 14            | 6             | 1.040047                | -2.544035 | 2.294091  |
| 15            | 1             | 0.005521                | -0.832418 | 3.003322  |
| 16            | 6             | -1.055192               | -3.044431 | 1.324051  |
| 17            | 6             | 0.252938                | -3.551619 | 1.892671  |
| 18            | 1             | -1.872147               | -3.277652 | 2.018429  |
| 19            | 1             | -1.320054               | -3.503006 | 0.368881  |
| 20            | 6             | 0.475177                | -5.035804 | 2.006666  |
| 21            | 6             | 2.340790                | -2.633009 | 3.042823  |
| 22            | 1             | 2.625250                | -3.668340 | 3.252715  |
| 23            | 1             | 2.266167                | -2.101131 | 4.002515  |
| 24            | 1             | 3.160142                | -2.164556 | 2.486440  |
| 25            | 1             | 1.439385                | -5.276927 | 2.463239  |
| 26            | 1             | 0.443951                | -5.511909 | 1.016356  |
| 27            | 1             | -0.313255               | -5.507221 | 2.611148  |
| 28            | 6             | 0.254851                | 2.288616  | 3.578397  |
| 29            | 6             | 2.382127                | 3.370421  | 1.439229  |
| 30            | 6             | 0.736645                | 4.321250  | -1.144436 |
| 31            | 6             | -2.316522               | 3.838867  | -0.612535 |
| 32            | 6             | -2.604815               | 2.527067  | 2.367507  |
| 33            | 1             | 0.045665                | 3.153149  | 4.226368  |
| 34            | 1             | 1.300053                | 2.007956  | 3.734554  |
| 35            | 1             | -0.371022               | 1.460489  | 3.928976  |
| 36            | 1             | 2.549573                | 4.326586  | 1.956422  |
| 37            | 1             | 2.951099                | 3.397288  | 0.505319  |
| 38            | 1             | 2.808139                | 2.580526  | 2.065445  |
| 39            | 1             | 0.661882                | 5.410510  | -1.009757 |
| 40            | 1             | 0.195054                | 4.052573  | -2.055380 |
| 41            | 1             | 1.792107                | 4.079739  | -1.304469 |
| 42            | 1             | -2.346752               | 4.936369  | -0.662389 |
| 43            | 1             | -3.297621               | 3.496374  | -0.271670 |
| 44            | 1             | -2.162483               | 3.465122  | -1.631196 |
| 45            | 1             | -2.642279               | 3.173732  | 3.255353  |
| 46            | 1             | -2.677594               | 1.490587  | 2.717572  |
| 47            | 1             | -3.495279               | 2.742037  | 1.770804  |
| 48            | 6             | 2.777888                | -0.249238 | -0.531788 |
| 49            | 6             | 3.004224                | 0.589176  | -1.817131 |
| 50            | 6             | 4.005401                | -0.044204 | 0.400916  |
| 51            | 6             | 2.695796                | -1.751534 | -0.937819 |
| 52            | 6             | 4.307281                | 0.151585  | -2.530786 |
| 53            | 1             | 2.144636                | 0.471591  | -2.482194 |
| 54            | 1             | 3.058596                | 1.653384  | -1.548093 |



|    |   |           |           |           |
|----|---|-----------|-----------|-----------|
| 55 | 6 | 5.307846  | -0.493836 | -0.307355 |
| 56 | 1 | 4.075744  | 1.015695  | 0.677573  |
| 57 | 1 | 3.870391  | -0.613537 | 1.328107  |
| 58 | 6 | 3.999640  | -2.194555 | -1.645978 |
| 59 | 1 | 2.518694  | -2.363513 | -0.044263 |
| 60 | 1 | 1.832475  | -1.883875 | -1.603057 |
| 61 | 6 | 4.205361  | -1.343354 | -2.922613 |
| 62 | 6 | 5.516324  | 0.352489  | -1.586266 |
| 63 | 1 | 4.440358  | 0.760007  | -3.435731 |
| 64 | 6 | 5.201299  | -1.990463 | -0.690817 |
| 65 | 1 | 6.156672  | -0.348137 | 0.375304  |
| 66 | 1 | 3.921153  | -3.256388 | -1.918135 |
| 67 | 1 | 5.119191  | -1.660094 | -3.445017 |
| 68 | 1 | 3.365293  | -1.494222 | -3.614568 |
| 69 | 1 | 6.446415  | 0.053353  | -2.089890 |
| 70 | 1 | 5.617626  | 1.415014  | -1.322591 |
| 71 | 1 | 6.130167  | -2.320427 | -1.176854 |
| 72 | 1 | 5.074019  | -2.603745 | 0.213087  |
| 73 | 6 | -2.764747 | -0.911087 | -0.183913 |
| 74 | 6 | -2.488356 | -1.676677 | -1.510117 |
| 75 | 6 | -3.799655 | -1.699626 | 0.672999  |
| 76 | 6 | -3.415926 | 0.455083  | -0.526497 |
| 77 | 6 | -3.813596 | -1.877536 | -2.289766 |
| 78 | 1 | -1.773765 | -1.103317 | -2.108291 |
| 79 | 1 | -2.037277 | -2.653892 | -1.301290 |
| 80 | 6 | -5.118191 | -1.897961 | -0.122539 |
| 81 | 1 | -3.425041 | -2.686735 | 0.947925  |
| 82 | 1 | -3.994077 | -1.147521 | 1.603582  |
| 83 | 6 | -4.726266 | 0.268577  | -1.329051 |
| 84 | 1 | -3.628648 | 0.986020  | 0.407453  |
| 85 | 1 | -2.712926 | 1.053969  | -1.108315 |
| 86 | 6 | -4.424522 | -0.499127 | -2.638300 |
| 87 | 6 | -4.814235 | -2.681499 | -1.424079 |
| 88 | 1 | -3.597380 | -2.430048 | -3.213909 |
| 89 | 6 | -5.739594 | -0.529245 | -0.478161 |
| 90 | 1 | -5.816641 | -2.473640 | 0.499993  |
| 91 | 1 | -5.138059 | 1.258433  | -1.568416 |
| 92 | 1 | -5.347924 | -0.631893 | -3.219073 |
| 93 | 1 | -3.725455 | 0.075262  | -3.259806 |
| 94 | 1 | -5.744427 | -2.852215 | -1.983166 |
| 95 | 1 | -4.397212 | -3.670096 | -1.182426 |
| 96 | 1 | -6.677113 | -0.672644 | -1.032891 |
| 97 | 1 | -5.986078 | 0.025086  | 0.438637  |

**11<sup>1-Ad</sup>** (E = -1663.7257759 a.u.)

| Center Number | Atomic Number | Coordinates (Angstroms) |           |           |
|---------------|---------------|-------------------------|-----------|-----------|
|               |               | X                       | Y         | Z         |
| 1             | 22            | -2.781991               | -0.224206 | -0.491218 |
| 2             | 7             | -1.195161               | 0.666707  | -0.220999 |
| 3             | 6             | -0.852542               | -0.633804 | 0.217567  |
| 4             | 7             | 2.434871                | -0.681209 | -0.642769 |
| 5             | 6             | -3.798318               | 0.007434  | 1.624758  |
| 6             | 6             | -3.757096               | -1.395606 | 1.339542  |
| 7             | 6             | -4.674010               | 0.618441  | 0.683563  |
| 8             | 17            | -3.024647               | -0.669790 | -2.771996 |
| 9             | 6             | -4.632168               | -1.642250 | 0.236711  |
| 10            | 6             | -5.184128               | -0.401941 | -0.175923 |
| 11            | 6             | 1.586911                | -1.431151 | -0.073696 |
| 12            | 6             | 0.134680                | -1.528522 | -0.581131 |
| 13            | 1             | -0.713060               | -0.757242 | 1.298069  |
| 14            | 6             | -0.133752               | -3.014238 | -0.352964 |
| 15            | 1             | 0.088408                | -1.246806 | -1.635879 |
| 16            | 6             | 1.728561                | -2.504145 | 1.010102  |
| 17            | 6             | 0.706142                | -3.528448 | 0.560715  |
| 18            | 1             | 2.731288                | -2.927229 | 1.076064  |

|    |   |           |           |           |
|----|---|-----------|-----------|-----------|
| 19 | 1 | 1.495899  | -2.093683 | 2.003172  |
| 20 | 6 | 0.760904  | -4.926911 | 1.115116  |
| 21 | 6 | -1.196928 | -3.746398 | -1.124738 |
| 22 | 1 | -1.161688 | -4.825306 | -0.943321 |
| 23 | 1 | -1.068636 | -3.576470 | -2.201675 |
| 24 | 1 | -2.207052 | -3.402337 | -0.876361 |
| 25 | 1 | -0.009397 | -5.576494 | 0.689130  |
| 26 | 1 | 0.627209  | -4.918754 | 2.206624  |
| 27 | 1 | 1.739602  | -5.388264 | 0.920130  |
| 28 | 6 | -3.098102 | -2.440840 | 2.205185  |
| 29 | 6 | -3.164078 | 0.659969  | 2.827676  |
| 30 | 6 | -5.107440 | 2.065539  | 0.645744  |
| 31 | 6 | -6.210256 | -0.214448 | -1.263967 |
| 32 | 6 | -4.987498 | -2.980941 | -0.362267 |
| 33 | 1 | -3.779538 | -2.754842 | 3.009151  |
| 34 | 1 | -2.186270 | -2.060053 | 2.673980  |
| 35 | 1 | -2.823818 | -3.332916 | 1.634891  |
| 36 | 1 | -3.776394 | 0.482672  | 3.723293  |
| 37 | 1 | -3.067880 | 1.741943  | 2.702361  |
| 38 | 1 | -2.165774 | 0.259134  | 3.029740  |
| 39 | 1 | -6.160024 | 2.148834  | 0.949138  |
| 40 | 1 | -5.026388 | 2.502258  | -0.356892 |
| 41 | 1 | -4.518742 | 2.684022  | 1.327796  |
| 42 | 1 | -7.219413 | -0.419034 | -0.877869 |
| 43 | 1 | -6.029465 | -0.888687 | -2.106246 |
| 44 | 1 | -6.207057 | 0.808889  | -1.652317 |
| 45 | 1 | -6.028495 | -3.239055 | -0.123410 |
| 46 | 1 | -4.354380 | -3.782302 | 0.028791  |
| 47 | 1 | -4.892956 | -2.975464 | -1.454057 |
| 48 | 6 | 3.882235  | -0.613408 | -0.309548 |
| 49 | 6 | 4.625528  | -1.901912 | -0.772854 |
| 50 | 6 | 4.456875  | 0.576195  | -1.131990 |
| 51 | 6 | 4.180535  | -0.346136 | 1.193647  |
| 52 | 6 | 6.149898  | -1.757944 | -0.532929 |
| 53 | 1 | 4.249641  | -2.779001 | -0.233432 |
| 54 | 1 | 4.418895  | -2.064324 | -1.839171 |
| 55 | 6 | 5.978573  | 0.731244  | -0.908956 |
| 56 | 1 | 4.236213  | 0.403171  | -2.193406 |
| 57 | 1 | 3.932826  | 1.495418  | -0.841328 |
| 58 | 6 | 5.708282  | -0.206139 | 1.419432  |
| 59 | 1 | 3.665458  | 0.574464  | 1.501861  |
| 60 | 1 | 3.794180  | -1.159280 | 1.817770  |
| 61 | 6 | 6.414974  | -1.510823 | 0.973382  |
| 62 | 6 | 6.696905  | -0.565526 | -1.353934 |
| 63 | 1 | 6.650415  | -2.683810 | -0.847627 |
| 64 | 6 | 6.253331  | 0.983680  | 0.593541  |
| 65 | 1 | 6.348304  | 1.580048  | -1.500071 |
| 66 | 1 | 5.897705  | -0.032059 | 2.487581  |
| 67 | 1 | 7.495666  | -1.433351 | 1.156276  |
| 68 | 1 | 6.047594  | -2.360945 | 1.566426  |
| 69 | 1 | 7.781240  | -0.469648 | -1.202766 |
| 70 | 1 | 6.532324  | -0.739207 | -2.426340 |
| 71 | 1 | 7.332186  | 1.100097  | 0.767513  |
| 72 | 1 | 5.770524  | 1.917599  | 0.914085  |
| 73 | 6 | -0.521170 | 1.972420  | -0.073786 |
| 74 | 6 | -1.597582 | 3.086742  | -0.166926 |
| 75 | 6 | 0.214922  | 2.099100  | 1.286421  |
| 76 | 6 | 0.501092  | 2.183075  | -1.227463 |
| 77 | 6 | -0.947747 | 4.486269  | -0.048898 |
| 78 | 1 | -2.127876 | 2.994993  | -1.126013 |
| 79 | 1 | -2.331296 | 2.947210  | 0.636744  |
| 80 | 6 | 0.867673  | 3.500358  | 1.407593  |
| 81 | 1 | -0.498438 | 1.943731  | 2.106626  |
| 82 | 1 | 0.981179  | 1.317366  | 1.359449  |

|    |   |           |          |           |
|----|---|-----------|----------|-----------|
| 83 | 6 | 1.160004  | 3.580799 | -1.103743 |
| 84 | 1 | 1.256194  | 1.390715 | -1.193544 |
| 85 | 1 | -0.028365 | 2.095288 | -2.185805 |
| 86 | 6 | 0.073430  | 4.679765 | -1.196335 |
| 87 | 6 | -0.223844 | 4.594934 | 1.315954  |
| 88 | 1 | -1.729817 | 5.255034 | -0.114917 |
| 89 | 6 | 1.886720  | 3.697038 | 0.259221  |
| 90 | 1 | 1.382256  | 3.573880 | 2.375605  |
| 91 | 1 | 1.884456  | 3.708331 | -1.919428 |
| 92 | 1 | 0.532961  | 5.675607 | -1.126242 |
| 93 | 1 | -0.436944 | 4.624684 | -2.168069 |
| 94 | 1 | 0.231236  | 5.589257 | 1.422879  |
| 95 | 1 | -0.946086 | 4.479475 | 2.137057  |
| 96 | 1 | 2.366403  | 4.681990 | 0.348042  |
| 97 | 1 | 2.680732  | 2.942090 | 0.330106  |

**TS11<sup>1-Ad</sup>-12<sup>1-Ad</sup>** (E = -1663.7021739 a.u.)

| Center Number | Atomic Number | Coordinates (Angstroms) |           |           |
|---------------|---------------|-------------------------|-----------|-----------|
|               |               | X                       | Y         | Z         |
| 1             | 22            | 1.091059                | 0.021358  | -0.255810 |
| 2             | 7             | 0.387211                | -0.767374 | 1.344820  |
| 3             | 6             | -0.217056               | 0.464631  | 1.457617  |
| 4             | 7             | -2.408225               | -1.027493 | -0.077578 |
| 5             | 6             | 3.350594                | 0.437099  | 0.237323  |
| 6             | 6             | 2.669120                | 1.680454  | 0.400875  |
| 7             | 6             | 3.305977                | 0.098428  | -1.149203 |
| 8             | 17            | 0.652003                | -1.613062 | -1.887619 |
| 9             | 6             | 2.203175                | 2.101414  | -0.884301 |
| 10            | 6             | 2.600478                | 1.122932  | -1.837104 |
| 11            | 6             | -2.151186               | 0.179766  | -0.326402 |
| 12            | 6             | -1.043917               | 0.963455  | 0.402668  |
| 13            | 1             | 0.025886                | 1.131066  | 2.285701  |
| 14            | 6             | -1.598877               | 2.364010  | 0.462141  |
| 15            | 1             | -0.198418               | 1.055249  | -0.826668 |
| 16            | 6             | -2.853570               | 1.230970  | -1.188117 |
| 17            | 6             | -2.590367               | 2.513558  | -0.434664 |
| 18            | 1             | -2.415276               | 1.259090  | -2.195984 |
| 19            | 1             | -3.919409               | 1.039462  | -1.309683 |
| 20            | 6             | -3.417908               | 3.733288  | -0.729760 |
| 21            | 6             | -1.134242               | 3.380043  | 1.471378  |
| 22            | 1             | -1.591965               | 4.357175  | 1.294410  |
| 23            | 1             | -0.048485               | 3.509516  | 1.458299  |
| 24            | 1             | -1.404729               | 3.067338  | 2.489263  |
| 25            | 1             | -3.108627               | 4.605529  | -0.147378 |
| 26            | 1             | -4.479905               | 3.544619  | -0.518251 |
| 27            | 1             | -3.349784               | 3.995405  | -1.795024 |
| 28            | 6             | 2.700772                | 2.501500  | 1.668379  |
| 29            | 6             | 4.226473                | -0.229230 | 1.270100  |
| 30            | 6             | 4.005429                | -1.075077 | -1.786254 |
| 31            | 6             | 2.356499                | 1.182297  | -3.322620 |
| 32            | 6             | 1.568783                | 3.428276  | -1.225668 |
| 33            | 1             | 3.712048                | 2.901911  | 1.829132  |
| 34            | 1             | 2.439675                | 1.912427  | 2.553969  |
| 35            | 1             | 2.020229                | 3.355204  | 1.621426  |
| 36            | 1             | 5.252080                | 0.164137  | 1.204022  |
| 37            | 1             | 4.283965                | -1.312199 | 1.124669  |
| 38            | 1             | 3.870577                | -0.046413 | 2.287343  |
| 39            | 1             | 5.037490                | -0.801426 | -2.050242 |
| 40            | 1             | 3.495710                | -1.399841 | -2.696568 |
| 41            | 1             | 4.053489                | -1.935708 | -1.111541 |
| 42            | 1             | 3.226071                | 1.609197  | -3.842880 |
| 43            | 1             | 1.488576                | 1.804832  | -3.562730 |
| 44            | 1             | 2.172919                | 0.185489  | -3.734499 |
| 45            | 1             | 2.329530                | 4.122136  | -1.610779 |
| 46            | 1             | 1.106751                | 3.900246  | -0.355712 |

|    |   |           |           |           |
|----|---|-----------|-----------|-----------|
| 47 | 1 | 0.796728  | 3.325719  | -1.994802 |
| 48 | 6 | -3.496657 | -1.820273 | -0.702251 |
| 49 | 6 | -3.532192 | -1.739447 | -2.256176 |
| 50 | 6 | -3.222701 | -3.301006 | -0.309890 |
| 51 | 6 | -4.885209 | -1.421651 | -0.122057 |
| 52 | 6 | -4.640352 | -2.670314 | -2.812625 |
| 53 | 1 | -3.726950 | -0.715017 | -2.590251 |
| 54 | 1 | -2.549803 | -2.030792 | -2.648710 |
| 55 | 6 | -4.317989 | -4.239454 | -0.865284 |
| 56 | 1 | -2.233758 | -3.586503 | -0.690546 |
| 57 | 1 | -3.181210 | -3.368700 | 0.784716  |
| 58 | 6 | -5.987048 | -2.351452 | -0.691666 |
| 59 | 1 | -4.848818 | -1.496797 | 0.973286  |
| 60 | 1 | -5.117782 | -0.378046 | -0.368682 |
| 61 | 6 | -6.012104 | -2.237816 | -2.236529 |
| 62 | 6 | -4.349181 | -4.134996 | -2.408867 |
| 63 | 1 | -4.658625 | -2.585954 | -3.907822 |
| 64 | 6 | -5.692149 | -3.817322 | -0.290041 |
| 65 | 1 | -4.095575 | -5.273494 | -0.568671 |
| 66 | 1 | -6.959943 | -2.045003 | -0.283413 |
| 67 | 1 | -6.809384 | -2.873731 | -2.645708 |
| 68 | 1 | -6.238474 | -1.204001 | -2.535884 |
| 69 | 1 | -5.121963 | -4.800262 | -2.819115 |
| 70 | 1 | -3.386083 | -4.456714 | -2.828313 |
| 71 | 1 | -6.483031 | -4.477609 | -0.672624 |
| 72 | 1 | -5.689023 | -3.914720 | 0.804666  |
| 73 | 6 | 0.539150  | -1.699725 | 2.474783  |
| 74 | 6 | 1.418497  | -2.889928 | 2.020690  |
| 75 | 6 | 1.187113  | -1.030607 | 3.722001  |
| 76 | 6 | -0.860169 | -2.243323 | 2.886915  |
| 77 | 6 | 1.562462  | -3.921434 | 3.165719  |
| 78 | 1 | 0.959799  | -3.351691 | 1.137946  |
| 79 | 1 | 2.406635  | -2.519499 | 1.719231  |
| 80 | 6 | 1.332209  | -2.065090 | 4.867605  |
| 81 | 1 | 2.171043  | -0.627902 | 3.452168  |
| 82 | 1 | 0.566163  | -0.190541 | 4.062326  |
| 83 | 6 | -0.721606 | -3.274450 | 4.032245  |
| 84 | 1 | -1.491810 | -1.401281 | 3.202123  |
| 85 | 1 | -1.336466 | -2.687474 | 2.008140  |
| 86 | 6 | 0.163031  | -4.454640 | 3.559923  |
| 87 | 6 | 2.219354  | -3.242261 | 4.393041  |
| 88 | 1 | 2.191807  | -4.754332 | 2.824204  |
| 89 | 6 | -0.066378 | -2.599723 | 5.261720  |
| 90 | 1 | 1.798956  | -1.577135 | 5.734365  |
| 91 | 1 | -1.718861 | -3.647061 | 4.303695  |
| 92 | 1 | 0.255952  | -5.201413 | 4.360932  |
| 93 | 1 | -0.304170 | -4.954997 | 2.700592  |
| 94 | 1 | 2.342562  | -3.970497 | 5.206719  |
| 95 | 1 | 3.222756  | -2.877374 | 4.130861  |
| 96 | 1 | 0.025977  | -3.320646 | 6.085975  |
| 97 | 1 | -0.698101 | -1.775082 | 5.621627  |

**12<sup>1-Ad</sup>** (E = -1663.7160899 a.u.)

| Center Number | Atomic Number | Coordinates (Angstroms) |           |           |
|---------------|---------------|-------------------------|-----------|-----------|
|               |               | X                       | Y         | Z         |
| 1             | 22            | -1.284270               | -0.994575 | -0.693488 |
| 2             | 7             | -1.176775               | 0.558252  | 0.443464  |
| 3             | 6             | -0.928650               | -0.153030 | 1.608885  |
| 4             | 7             | 1.948891                | 0.109448  | 0.538424  |
| 5             | 6             | -3.581654               | -1.256529 | -1.184760 |
| 6             | 6             | -3.319961               | -1.978064 | 0.014947  |
| 7             | 6             | -2.905157               | -1.925632 | -2.252606 |
| 8             | 17            | -0.186489               | -0.321866 | -2.618576 |
| 9             | 6             | -2.454762               | -3.065472 | -0.305776 |
| 10            | 6             | -2.210326               | -3.034004 | -1.711805 |

|    |   |           |           |           |
|----|---|-----------|-----------|-----------|
| 11 | 6 | 1.523360  | -0.909689 | 1.159416  |
| 12 | 6 | 0.176709  | -0.933314 | 1.834041  |
| 13 | 1 | -1.704737 | -0.157983 | 2.376968  |
| 14 | 6 | 0.282289  | -1.911590 | 2.928074  |
| 15 | 1 | -0.161520 | -2.193781 | -0.370357 |
| 16 | 6 | 2.214227  | -2.205066 | 1.595034  |
| 17 | 6 | 1.416918  | -2.636417 | 2.800734  |
| 18 | 1 | 2.154585  | -2.957591 | 0.797723  |
| 19 | 1 | 3.271073  | -2.067369 | 1.829202  |
| 20 | 6 | 1.916439  | -3.758862 | 3.663733  |
| 21 | 6 | -0.754132 | -2.033215 | 4.015225  |
| 22 | 1 | -0.477250 | -2.789243 | 4.754662  |
| 23 | 1 | -1.736820 | -2.305882 | 3.610759  |
| 24 | 1 | -0.879256 | -1.078548 | 4.543105  |
| 25 | 1 | 1.240956  | -3.990250 | 4.491895  |
| 26 | 1 | 2.901155  | -3.514605 | 4.086932  |
| 27 | 1 | 2.048980  | -4.673147 | 3.067684  |
| 28 | 6 | -4.008814 | -1.752407 | 1.338254  |
| 29 | 6 | -4.614271 | -0.171159 | -1.362653 |
| 30 | 6 | -3.026354 | -1.582676 | -3.713763 |
| 31 | 6 | -1.372482 | -4.012477 | -2.492434 |
| 32 | 6 | -2.017325 | -4.153971 | 0.641236  |
| 33 | 1 | -4.999941 | -2.228494 | 1.330918  |
| 34 | 1 | -4.157131 | -0.689696 | 1.552092  |
| 35 | 1 | -3.446270 | -2.186773 | 2.169067  |
| 36 | 1 | -5.582220 | -0.616965 | -1.635446 |
| 37 | 1 | -4.342884 | 0.527905  | -2.159727 |
| 38 | 1 | -4.765859 | 0.405709  | -0.446672 |
| 39 | 1 | -3.904036 | -2.085355 | -4.145627 |
| 40 | 1 | -2.144136 | -1.899113 | -4.275965 |
| 41 | 1 | -3.145215 | -0.506693 | -3.871107 |
| 42 | 1 | -1.998057 | -4.808038 | -2.921762 |
| 43 | 1 | -0.616460 | -4.486341 | -1.859271 |
| 44 | 1 | -0.849294 | -3.518217 | -3.317128 |
| 45 | 1 | -2.791433 | -4.931736 | 0.712376  |
| 46 | 1 | -1.837287 | -3.771600 | 1.649877  |
| 47 | 1 | -1.093377 | -4.630546 | 0.302222  |
| 48 | 6 | 3.297113  | 0.255637  | -0.056182 |
| 49 | 6 | 3.747335  | -0.940244 | -0.944720 |
| 50 | 6 | 3.220865  | 1.520963  | -0.959707 |
| 51 | 6 | 4.365748  | 0.520147  | 1.045883  |
| 52 | 6 | 5.125041  | -0.635629 | -1.588329 |
| 53 | 1 | 3.827620  | -1.858056 | -0.352733 |
| 54 | 1 | 2.988915  | -1.112656 | -1.719010 |
| 55 | 6 | 4.588648  | 1.829078  | -1.609153 |
| 56 | 1 | 2.452190  | 1.357260  | -1.724765 |
| 57 | 1 | 2.889172  | 2.366127  | -0.342154 |
| 58 | 6 | 5.741765  | 0.812860  | 0.395139  |
| 59 | 1 | 4.041588  | 1.372742  | 1.657954  |
| 60 | 1 | 4.448802  | -0.347074 | 1.713264  |
| 61 | 6 | 6.171875  | -0.397365 | -0.471291 |
| 62 | 6 | 5.024660  | 0.625441  | -2.478924 |
| 63 | 1 | 5.429936  | -1.495937 | -2.199945 |
| 64 | 6 | 5.639468  | 2.072981  | -0.498724 |
| 65 | 1 | 4.500005  | 2.726121  | -2.237054 |
| 66 | 1 | 6.483849  | 0.981264  | 1.187774  |
| 67 | 1 | 7.159217  | -0.208078 | -0.915041 |
| 68 | 1 | 6.266727  | -1.296133 | 0.155562  |
| 69 | 1 | 5.995245  | 0.830511  | -2.952391 |
| 70 | 1 | 4.296976  | 0.460076  | -3.285195 |
| 71 | 1 | 6.618803  | 2.297215  | -0.944436 |
| 72 | 1 | 5.351947  | 2.942995  | 0.108182  |
| 73 | 6 | -1.587182 | 1.982870  | 0.531672  |
| 74 | 6 | -1.866649 | 2.515660  | -0.894523 |

|    |   |           |          |           |
|----|---|-----------|----------|-----------|
| 75 | 6 | -2.852241 | 2.200781 | 1.412233  |
| 76 | 6 | -0.414700 | 2.805026 | 1.144583  |
| 77 | 6 | -2.234285 | 4.018812 | -0.847910 |
| 78 | 1 | -0.978132 | 2.352690 | -1.514392 |
| 79 | 1 | -2.686854 | 1.944274 | -1.346982 |
| 80 | 6 | -3.218466 | 3.707016 | 1.458583  |
| 81 | 1 | -3.689784 | 1.624391 | 0.999671  |
| 82 | 1 | -2.671698 | 1.838300 | 2.433234  |
| 83 | 6 | -0.778494 | 4.308307 | 1.195791  |
| 84 | 1 | -0.201860 | 2.430929 | 2.155890  |
| 85 | 1 | 0.484983  | 2.633167 | 0.544619  |
| 86 | 6 | -1.058048 | 4.820212 | -0.238573 |
| 87 | 6 | -3.498722 | 4.216312 | 0.023603  |
| 88 | 1 | -2.430995 | 4.371497 | -1.869334 |
| 89 | 6 | -2.041416 | 4.506559 | 2.068964  |
| 90 | 1 | -4.115557 | 3.838544 | 2.079222  |
| 91 | 1 | 0.061661  | 4.867259 | 1.630028  |
| 92 | 1 | -1.302608 | 5.891493 | -0.216777 |
| 93 | 1 | -0.160803 | 4.703311 | -0.861654 |
| 94 | 1 | -3.777652 | 5.278874 | 0.050397  |
| 95 | 1 | -4.347606 | 3.670219 | -0.412252 |
| 96 | 1 | -2.301068 | 5.572940 | 2.123457  |
| 97 | 1 | -1.847372 | 4.167435 | 3.096591  |

TS12<sup>1-Ad</sup>-13<sup>1-Ad</sup> (E = -1663.7051386 a.u.)

| Center Number | Atomic Number | Coordinates (Angstroms) |           |           |
|---------------|---------------|-------------------------|-----------|-----------|
|               |               | X                       | Y         | Z         |
| 1             | 22            | -0.103314               | -0.848376 | 0.726967  |
| 2             | 7             | -1.530240               | 0.473177  | 0.370116  |
| 3             | 6             | -1.203377               | 1.645288  | 1.001443  |
| 4             | 7             | 1.556529                | 0.730180  | 0.011223  |
| 5             | 6             | -1.434265               | -2.143900 | 2.259031  |
| 6             | 6             | -0.247749               | -1.744999 | 2.936855  |
| 7             | 6             | -1.063109               | -3.035285 | 1.216025  |
| 8             | 17            | 0.004020                | -1.709476 | -1.594362 |
| 9             | 6             | 0.855172                | -2.456721 | 2.359299  |
| 10            | 6             | 0.357905                | -3.235185 | 1.296786  |
| 11            | 6             | 1.284323                | 1.918625  | 0.457560  |
| 12            | 6             | 0.012926                | 2.275591  | 1.088498  |
| 13            | 1             | -2.028705               | 2.197713  | 1.441944  |
| 14            | 6             | 0.155591                | 3.606212  | 1.708712  |
| 15            | 1             | 0.726620                | -0.056545 | 1.904054  |
| 16            | 6             | 2.151112                | 3.181467  | 0.547901  |
| 17            | 6             | 1.349466                | 4.140917  | 1.387423  |
| 18            | 1             | 3.113396                | 2.976823  | 1.016776  |
| 19            | 1             | 2.360820                | 3.599212  | -0.444210 |
| 20            | 6             | 1.916038                | 5.488870  | 1.734049  |
| 21            | 6             | -0.937612               | 4.245758  | 2.524566  |
| 22            | 1             | -0.608814               | 5.191194  | 2.964724  |
| 23            | 1             | -1.258365               | 3.586136  | 3.341563  |
| 24            | 1             | -1.824760               | 4.457471  | 1.911904  |
| 25            | 1             | 1.248983                | 6.066889  | 2.380321  |
| 26            | 1             | 2.101147                | 6.083483  | 0.827455  |
| 27            | 1             | 2.882415                | 5.389655  | 2.249172  |
| 28            | 6             | -0.206058               | -0.946523 | 4.215117  |
| 29            | 6             | -2.823768               | -1.816102 | 2.749757  |
| 30            | 6             | -1.962614               | -3.872970 | 0.344895  |
| 31            | 6             | 1.118775                | -4.227604 | 0.457952  |
| 32            | 6             | 2.262003                | -2.422926 | 2.898692  |
| 33            | 1             | -0.426965               | -1.593680 | 5.077248  |
| 34            | 1             | -0.944570               | -0.138260 | 4.210432  |
| 35            | 1             | 0.777831                | -0.495766 | 4.374089  |
| 36            | 1             | -2.983009               | -2.268984 | 3.738543  |
| 37            | 1             | -3.595630               | -2.207892 | 2.083297  |
| 38            | 1             | -2.985238               | -0.738053 | 2.853781  |

|    |   |           |           |           |
|----|---|-----------|-----------|-----------|
| 39 | 1 | -1.845541 | -4.936140 | 0.598288  |
| 40 | 1 | -1.713034 | -3.753321 | -0.714901 |
| 41 | 1 | -3.016786 | -3.617483 | 0.477910  |
| 42 | 1 | 0.860584  | -5.252986 | 0.759681  |
| 43 | 1 | 2.200968  | -4.112453 | 0.569949  |
| 44 | 1 | 0.873434  | -4.116323 | -0.602716 |
| 45 | 1 | 2.308672  | -2.937477 | 3.868857  |
| 46 | 1 | 2.611877  | -1.395984 | 3.054525  |
| 47 | 1 | 2.966783  | -2.921445 | 2.227865  |
| 48 | 6 | -2.835921 | 0.525173  | -0.399995 |
| 49 | 6 | -3.305106 | -0.896757 | -0.784795 |
| 50 | 6 | -4.000808 | 1.219364  | 0.370973  |
| 51 | 6 | -2.559485 | 1.326839  | -1.708133 |
| 52 | 6 | -4.570105 | -0.841311 | -1.677132 |
| 53 | 1 | -2.497591 | -1.413829 | -1.307166 |
| 54 | 1 | -3.531083 | -1.458532 | 0.125588  |
| 55 | 6 | -5.275098 | 1.273895  | -0.514344 |
| 56 | 1 | -4.206292 | 0.671914  | 1.300785  |
| 57 | 1 | -3.740838 | 2.248875  | 0.642914  |
| 58 | 6 | -3.832524 | 1.393089  | -2.586458 |
| 59 | 1 | -2.225794 | 2.340838  | -1.446678 |
| 60 | 1 | -1.740961 | 0.838325  | -2.249329 |
| 61 | 6 | -4.266272 | -0.042935 | -2.967410 |
| 62 | 6 | -5.717350 | -0.155924 | -0.900349 |
| 63 | 1 | -4.860686 | -1.867699 | -1.939720 |
| 64 | 6 | -4.971482 | 2.084542  | -1.798622 |
| 65 | 1 | -6.074325 | 1.769487  | 0.053659  |
| 66 | 1 | -3.610696 | 1.967016  | -3.496535 |
| 67 | 1 | -5.157012 | -0.011165 | -3.610441 |
| 68 | 1 | -3.468788 | -0.538070 | -3.537427 |
| 69 | 1 | -6.626669 | -0.115464 | -1.516082 |
| 70 | 1 | -5.962466 | -0.733642 | 0.002400  |
| 71 | 1 | -5.874858 | 2.152333  | -2.420456 |
| 72 | 1 | -4.680903 | 3.112152  | -1.537003 |
| 73 | 6 | 2.822690  | 0.383727  | -0.749641 |
| 74 | 6 | 4.116675  | 1.192405  | -0.413597 |
| 75 | 6 | 3.151333  | -1.104198 | -0.443847 |
| 76 | 6 | 2.533781  | 0.569209  | -2.269339 |
| 77 | 6 | 5.320188  | 0.679154  | -1.254337 |
| 78 | 1 | 3.994549  | 2.248160  | -0.657370 |
| 79 | 1 | 4.345272  | 1.110147  | 0.658091  |
| 80 | 6 | 4.324017  | -1.617432 | -1.312144 |
| 81 | 1 | 3.410995  | -1.189095 | 0.619287  |
| 82 | 1 | 2.269269  | -1.716316 | -0.633155 |
| 83 | 6 | 3.730927  | 0.059872  | -3.111235 |
| 84 | 1 | 1.623017  | 0.025754  | -2.528960 |
| 85 | 1 | 2.358536  | 1.636729  | -2.469291 |
| 86 | 6 | 5.002199  | 0.866903  | -2.757875 |
| 87 | 6 | 5.595624  | -0.812006 | -0.969152 |
| 88 | 1 | 6.201932  | 1.277836  | -0.986563 |
| 89 | 6 | 3.975053  | -1.440039 | -2.810770 |
| 90 | 1 | 4.486086  | -2.682637 | -1.096505 |
| 91 | 1 | 3.494035  | 0.187532  | -4.176265 |
| 92 | 1 | 5.851427  | 0.526388  | -3.366508 |
| 93 | 1 | 4.849375  | 1.932358  | -2.982567 |
| 94 | 1 | 6.447896  | -1.159867 | -1.569352 |
| 95 | 1 | 5.861743  | -0.955723 | 0.087913  |
| 96 | 1 | 4.797776  | -1.818069 | -3.433978 |
| 97 | 1 | 3.078921  | -2.022770 | -3.058810 |

$13^{1-Ad}$  (E = -1663.7110075 a.u.)

| Center Number | Atomic Number | Coordinates (Angstroms) |           |          |
|---------------|---------------|-------------------------|-----------|----------|
|               |               | X                       | Y         | Z        |
| 1             | 22            | -0.046051               | -0.820856 | 0.536807 |
| 2             | 7             | -1.602211               | 0.642184  | 0.100389 |

|    |    |           |           |           |
|----|----|-----------|-----------|-----------|
| 3  | 6  | -1.227401 | 1.880418  | 0.341628  |
| 4  | 7  | 1.547296  | 0.509048  | 0.161945  |
| 5  | 6  | -1.253973 | -2.079752 | 2.239861  |
| 6  | 6  | -0.025532 | -1.571685 | 2.777085  |
| 7  | 6  | -0.936143 | -3.022917 | 1.231687  |
| 8  | 17 | -0.388012 | -1.547625 | -1.816369 |
| 9  | 6  | 1.048075  | -2.224602 | 2.100477  |
| 10 | 6  | 0.483926  | -3.100541 | 1.124594  |
| 11 | 6  | 1.304491  | 1.764212  | 0.594381  |
| 12 | 6  | 0.033308  | 2.370208  | 0.738837  |
| 13 | 1  | -1.964894 | 2.664641  | 0.195133  |
| 14 | 6  | 0.200848  | 3.763085  | 1.210343  |
| 15 | 1  | -0.168991 | 0.240074  | 1.767863  |
| 16 | 6  | 2.323583  | 2.832403  | 1.004398  |
| 17 | 6  | 1.508107  | 4.039367  | 1.378549  |
| 18 | 1  | 2.909131  | 2.468969  | 1.856060  |
| 19 | 1  | 3.038434  | 3.074539  | 0.214615  |
| 20 | 6  | 2.174539  | 5.304862  | 1.843158  |
| 21 | 6  | -0.964436 | 4.687831  | 1.454744  |
| 22 | 1  | -0.636678 | 5.637420  | 1.887414  |
| 23 | 1  | -1.692267 | 4.236852  | 2.142549  |
| 24 | 1  | -1.499413 | 4.918978  | 0.523149  |
| 25 | 1  | 1.447526  | 6.078821  | 2.108294  |
| 26 | 1  | 2.830786  | 5.719763  | 1.063913  |
| 27 | 1  | 2.805826  | 5.123560  | 2.725247  |
| 28 | 6  | 0.101296  | -0.788159 | 4.060229  |
| 29 | 6  | -2.604014 | -1.775452 | 2.841798  |
| 30 | 6  | -1.880271 | -3.901862 | 0.454599  |
| 31 | 6  | 1.199057  | -4.101413 | 0.252897  |
| 32 | 6  | 2.482203  | -2.171362 | 2.570483  |
| 33 | 1  | 0.134878  | -1.475395 | 4.918969  |
| 34 | 1  | -0.745160 | -0.110352 | 4.202651  |
| 35 | 1  | 1.015130  | -0.187096 | 4.076851  |
| 36 | 1  | -2.619459 | -2.085698 | 3.895716  |
| 37 | 1  | -3.407320 | -2.313497 | 2.332272  |
| 38 | 1  | -2.839677 | -0.705892 | 2.812732  |
| 39 | 1  | -1.725557 | -4.953664 | 0.733435  |
| 40 | 1  | -1.706496 | -3.813671 | -0.623017 |
| 41 | 1  | -2.926525 | -3.656085 | 0.652061  |
| 42 | 1  | 0.908487  | -5.122519 | 0.536598  |
| 43 | 1  | 2.285151  | -4.029513 | 0.353220  |
| 44 | 1  | 0.943844  | -3.963744 | -0.803658 |
| 45 | 1  | 2.581365  | -2.728016 | 3.513643  |
| 46 | 1  | 2.816284  | -1.146548 | 2.759042  |
| 47 | 1  | 3.171563  | -2.623236 | 1.853338  |
| 48 | 6  | -2.996700 | 0.541876  | -0.514789 |
| 49 | 6  | -3.472979 | -0.928487 | -0.590066 |
| 50 | 6  | -4.055798 | 1.319353  | 0.331828  |
| 51 | 6  | -2.964522 | 1.127109  | -1.956922 |
| 52 | 6  | -4.869353 | -1.028340 | -1.256030 |
| 53 | 1  | -2.751598 | -1.516658 | -1.157575 |
| 54 | 1  | -3.524006 | -1.338904 | 0.422496  |
| 55 | 6  | -5.454349 | 1.233576  | -0.332690 |
| 56 | 1  | -4.087112 | 0.894514  | 1.344602  |
| 57 | 1  | -3.789818 | 2.377447  | 0.433609  |
| 58 | 6  | -4.366426 | 1.040207  | -2.608533 |
| 59 | 1  | -2.635628 | 2.174956  | -1.923102 |
| 60 | 1  | -2.226808 | 0.568577  | -2.543356 |
| 61 | 6  | -4.805956 | -0.441535 | -2.686650 |
| 62 | 6  | -5.904023 | -0.242442 | -0.419573 |
| 63 | 1  | -5.158995 | -2.087017 | -1.305667 |
| 64 | 6  | -5.385209 | 1.837347  | -1.757554 |
| 65 | 1  | -6.168652 | 1.805187  | 0.275669  |
| 66 | 1  | -4.316999 | 1.465571  | -3.620034 |



|    |   |           |           |           |
|----|---|-----------|-----------|-----------|
| 67 | 1 | -5.789888 | -0.519223 | -3.170116 |
| 68 | 1 | -4.094763 | -1.013017 | -3.297793 |
| 69 | 1 | -6.899247 | -0.308368 | -0.880951 |
| 70 | 1 | -5.984500 | -0.673368 | 0.588693  |
| 71 | 1 | -6.378338 | 1.803030  | -2.226448 |
| 72 | 1 | -5.088870 | 2.895012  | -1.705852 |
| 73 | 6 | 2.855084  | 0.222436  | -0.572170 |
| 74 | 6 | 4.150889  | 0.467043  | 0.266448  |
| 75 | 6 | 2.887996  | -1.269754 | -0.997592 |
| 76 | 6 | 2.895279  | 1.075468  | -1.876492 |
| 77 | 6 | 5.416019  | 0.153699  | -0.578370 |
| 78 | 1 | 4.229195  | 1.497872  | 0.606279  |
| 79 | 1 | 4.127868  | -0.170477 | 1.159204  |
| 80 | 6 | 4.147857  | -1.604526 | -1.834821 |
| 81 | 1 | 2.873886  | -1.896056 | -0.101219 |
| 82 | 1 | 1.997601  | -1.502200 | -1.581593 |
| 83 | 6 | 4.171416  | 0.761490  | -2.697081 |
| 84 | 1 | 1.996709  | 0.847203  | -2.462734 |
| 85 | 1 | 2.864935  | 2.145663  | -1.640224 |
| 86 | 6 | 5.427289  | 1.053396  | -1.839667 |
| 87 | 6 | 5.418706  | -1.330611 | -1.002095 |
| 88 | 1 | 6.303525  | 0.367750  | 0.033151  |
| 89 | 6 | 4.165253  | -0.729091 | -3.110205 |
| 90 | 1 | 4.106780  | -2.665412 | -2.117189 |
| 91 | 1 | 4.181708  | 1.394750  | -3.594631 |
| 92 | 1 | 6.336301  | 0.863053  | -2.426853 |
| 93 | 1 | 5.448752  | 2.113552  | -1.547723 |
| 94 | 1 | 6.319080  | -1.557554 | -1.589993 |
| 95 | 1 | 5.439960  | -1.977980 | -0.113617 |
| 96 | 1 | 5.053959  | -0.958788 | -3.714576 |
| 97 | 1 | 3.283904  | -0.945082 | -3.728706 |

TS13<sup>1-Ad</sup>-14<sup>1-Ad</sup> (E = -1663.6976382 a.u.)

| Center Number | Atomic Number | Coordinates (Angstroms) |           |           |
|---------------|---------------|-------------------------|-----------|-----------|
|               |               | X                       | Y         | Z         |
| 1             | 22            | 0.793912                | 0.287945  | 0.091183  |
| 2             | 7             | 0.158737                | 0.033882  | -1.672126 |
| 3             | 6             | -0.835324               | -0.930060 | -1.415242 |
| 4             | 7             | -1.238393               | 0.730633  | 0.946265  |
| 5             | 6             | 2.758470                | -1.023005 | -0.274761 |
| 6             | 6             | 2.051944                | -1.618187 | 0.812591  |
| 7             | 6             | 3.215341                | 0.252996  | 0.149131  |
| 8             | 17            | 0.999905                | 2.750314  | -0.164075 |
| 9             | 6             | 2.143998                | -0.733095 | 1.936785  |
| 10            | 6             | 2.845615                | 0.420370  | 1.525732  |
| 11            | 6             | -2.247148               | 0.308252  | 0.206424  |
| 12            | 6             | -2.069102               | -0.630376 | -0.862882 |
| 13            | 1             | -0.744179               | -1.876713 | -1.951042 |
| 14            | 6             | -3.341744               | -1.313859 | -1.116935 |
| 15            | 1             | -0.081316               | -1.151283 | 0.313942  |
| 16            | 6             | -3.762004               | 0.457037  | 0.366851  |
| 17            | 6             | -4.331619               | -0.681959 | -0.447621 |
| 18            | 1             | -4.121695               | 0.449884  | 1.392727  |
| 19            | 1             | -4.079005               | 1.415434  | -0.066144 |
| 20            | 6             | -5.814445               | -0.919975 | -0.492225 |
| 21            | 6             | -3.461410               | -2.479642 | -2.062887 |
| 22            | 1             | -4.495530               | -2.824261 | -2.151254 |
| 23            | 1             | -2.854652               | -3.329268 | -1.722260 |
| 24            | 1             | -3.106562               | -2.212169 | -3.067316 |
| 25            | 1             | -6.079118               | -1.751093 | -1.152873 |
| 26            | 1             | -6.347798               | -0.026215 | -0.848070 |
| 27            | 1             | -6.211385               | -1.147529 | 0.507577  |
| 28            | 6             | 1.613071                | -3.060720 | 0.879745  |
| 29            | 6             | 3.109201                | -1.751265 | -1.549062 |
| 30            | 6             | 4.119184                | 1.201528  | -0.595149 |

|    |   |           |           |           |
|----|---|-----------|-----------|-----------|
| 31 | 6 | 3.270771  | 1.595234  | 2.366671  |
| 32 | 6 | 1.709164  | -1.115001 | 3.330739  |
| 33 | 1 | 2.451844  | -3.697776 | 1.198823  |
| 34 | 1 | 1.272700  | -3.424667 | -0.094603 |
| 35 | 1 | 0.794808  | -3.202096 | 1.592387  |
| 36 | 1 | 3.821993  | -2.559966 | -1.333118 |
| 37 | 1 | 3.578329  | -1.088276 | -2.279761 |
| 38 | 1 | 2.231950  | -2.203301 | -2.023163 |
| 39 | 1 | 5.118262  | 1.212224  | -0.136124 |
| 40 | 1 | 3.725564  | 2.222893  | -0.570483 |
| 41 | 1 | 4.239409  | 0.912379  | -1.642463 |
| 42 | 1 | 4.364390  | 1.606474  | 2.476282  |
| 43 | 1 | 2.837700  | 1.560026  | 3.370218  |
| 44 | 1 | 2.973610  | 2.540693  | 1.899722  |
| 45 | 1 | 2.293314  | -1.977898 | 3.680230  |
| 46 | 1 | 0.651881  | -1.402053 | 3.374330  |
| 47 | 1 | 1.868671  | -0.303641 | 4.046108  |
| 48 | 6 | 0.272512  | 0.519255  | -3.090280 |
| 49 | 6 | 1.633529  | 1.224346  | -3.307245 |
| 50 | 6 | 0.145676  | -0.632595 | -4.130084 |
| 51 | 6 | -0.867601 | 1.549205  | -3.347424 |
| 52 | 6 | 1.728779  | 1.794066  | -4.744688 |
| 53 | 1 | 1.744995  | 2.023836  | -2.570108 |
| 54 | 1 | 2.442051  | 0.503248  | -3.145469 |
| 55 | 6 | 0.245429  | -0.068222 | -5.571274 |
| 56 | 1 | 0.936878  | -1.375375 | -3.957716 |
| 57 | 1 | -0.819012 | -1.143834 | -4.018007 |
| 58 | 6 | -0.774871 | 2.107914  | -4.789283 |
| 59 | 1 | -1.839833 | 1.063388  | -3.192217 |
| 60 | 1 | -0.777609 | 2.356164  | -2.611806 |
| 61 | 6 | 0.588956  | 2.814604  | -4.978932 |
| 62 | 6 | 1.607389  | 0.638749  | -5.766358 |
| 63 | 1 | 2.700091  | 2.293203  | -4.863854 |
| 64 | 6 | -0.900662 | 0.946710  | -5.805286 |
| 65 | 1 | 0.153714  | -0.899330 | -6.284014 |
| 66 | 1 | -1.589745 | 2.827545  | -4.947814 |
| 67 | 1 | 0.660316  | 3.233562  | -5.992578 |
| 68 | 1 | 0.680901  | 3.650364  | -4.272399 |
| 69 | 1 | 1.686323  | 1.026481  | -6.791582 |
| 70 | 1 | 2.429198  | -0.078130 | -5.626663 |
| 71 | 1 | -0.853123 | 1.335156  | -6.832138 |
| 72 | 1 | -1.874596 | 0.449178  | -5.692117 |
| 73 | 6 | -1.524017 | 1.479997  | 2.239601  |
| 74 | 6 | -2.208055 | 0.530720  | 3.275546  |
| 75 | 6 | -0.187237 | 1.935146  | 2.882450  |
| 76 | 6 | -2.374553 | 2.764153  | 2.011317  |
| 77 | 6 | -2.479793 | 1.282087  | 4.603981  |
| 78 | 1 | -3.147324 | 0.123252  | 2.895075  |
| 79 | 1 | -1.542333 | -0.324099 | 3.453868  |
| 80 | 6 | -0.418043 | 2.666123  | 4.229363  |
| 81 | 1 | 0.440054  | 1.055993  | 3.047579  |
| 82 | 1 | 0.338829  | 2.596488  | 2.193073  |
| 83 | 6 | -2.629254 | 3.485687  | 3.360549  |
| 84 | 1 | -1.829963 | 3.419227  | 1.320212  |
| 85 | 1 | -3.338346 | 2.533807  | 1.553409  |
| 86 | 6 | -3.363269 | 2.525062  | 4.329670  |
| 87 | 6 | -1.138173 | 1.730546  | 5.226293  |
| 88 | 1 | -3.001788 | 0.603890  | 5.292857  |
| 89 | 6 | -1.284901 | 3.922953  | 3.984707  |
| 90 | 1 | 0.557736  | 2.964179  | 4.636972  |
| 91 | 1 | -3.255693 | 4.368401  | 3.173539  |
| 92 | 1 | -3.583499 | 3.041187  | 5.274248  |
| 93 | 1 | -4.327515 | 2.216975  | 3.899408  |
| 94 | 1 | -1.315042 | 2.251284  | 6.177709  |

|    |   |           |          |          |
|----|---|-----------|----------|----------|
| 95 | 1 | -0.513991 | 0.853300 | 5.447705 |
| 96 | 1 | -1.460036 | 4.453816 | 4.930863 |
| 97 | 1 | -0.764404 | 4.616978 | 3.311269 |

**14<sup>1-Ad</sup>** (E = -1663.7400535 a.u.)

| Center Number | Atomic Number | Coordinates (Angstroms) |           |           |
|---------------|---------------|-------------------------|-----------|-----------|
|               |               | X                       | Y         | Z         |
| 1             | 22            | 0.086409                | -1.036141 | 0.219812  |
| 2             | 7             | -1.570127               | -0.211216 | 0.361093  |
| 3             | 6             | -1.194312               | 0.501305  | 1.610259  |
| 4             | 7             | 1.244116                | 0.670699  | 0.198509  |
| 5             | 6             | -0.765328               | -2.929913 | 1.503399  |
| 6             | 6             | 0.327771                | -2.385034 | 2.243298  |
| 7             | 6             | -0.241356               | -3.483541 | 0.310457  |
| 8             | 17            | 0.093045                | -1.335371 | -2.132718 |
| 9             | 6             | 1.538150                | -2.680627 | 1.538360  |
| 10            | 6             | 1.188273                | -3.338414 | 0.339625  |
| 11            | 6             | 0.623179                | 1.828211  | 0.656231  |
| 12            | 6             | -0.546455               | 1.811230  | 1.374624  |
| 13            | 1             | -2.009256               | 0.502461  | 2.335885  |
| 14            | 6             | -0.956882               | 3.160572  | 1.766673  |
| 15            | 1             | -0.412655               | -0.131073 | 2.096457  |
| 16            | 6             | 0.967443                | 3.306335  | 0.457857  |
| 17            | 6             | -0.076353               | 4.052406  | 1.255243  |
| 18            | 1             | 1.979316                | 3.592258  | 0.748060  |
| 19            | 1             | 0.861082                | 3.570426  | -0.600117 |
| 20            | 6             | -0.043408               | 5.551042  | 1.376847  |
| 21            | 6             | -2.155931               | 3.446286  | 2.635321  |
| 22            | 1             | -2.207898               | 4.503737  | 2.911624  |
| 23            | 1             | -2.120861               | 2.860775  | 3.564263  |
| 24            | 1             | -3.095595               | 3.190851  | 2.128436  |
| 25            | 1             | -0.876325               | 5.928971  | 1.979003  |
| 26            | 1             | -0.102051               | 6.037166  | 0.391769  |
| 27            | 1             | 0.889415                | 5.898293  | 1.845546  |
| 28            | 6             | 0.279825                | -1.905359 | 3.676343  |
| 29            | 6             | -2.179906               | -3.044281 | 2.013308  |
| 30            | 6             | -0.990437               | -4.272481 | -0.731731 |
| 31            | 6             | 2.109991                | -3.927115 | -0.695636 |
| 32            | 6             | 2.907560                | -2.528382 | 2.156473  |
| 33            | 1             | 0.550078                | -2.727599 | 4.355547  |
| 34            | 1             | -0.719921               | -1.564707 | 3.963002  |
| 35            | 1             | 0.983949                | -1.086759 | 3.863975  |
| 36            | 1             | -2.249686               | -3.853428 | 2.754467  |
| 37            | 1             | -2.882465               | -3.273383 | 1.208394  |
| 38            | 1             | -2.521935               | -2.124355 | 2.497878  |
| 39            | 1             | -0.798025               | -5.348020 | -0.606534 |
| 40            | 1             | -0.680128               | -3.990402 | -1.742648 |
| 41            | 1             | -2.070783               | -4.118304 | -0.660028 |
| 42            | 1             | 2.033256                | -5.023451 | -0.696473 |
| 43            | 1             | 3.155700                | -3.667839 | -0.507844 |
| 44            | 1             | 1.849746                | -3.577843 | -1.701629 |
| 45            | 1             | 2.980318                | -3.165018 | 3.049845  |
| 46            | 1             | 3.115597                | -1.500618 | 2.474552  |
| 47            | 1             | 3.703406                | -2.837526 | 1.473588  |
| 48            | 6             | -2.865594               | 0.091426  | -0.306311 |
| 49            | 6             | -3.289030               | -1.119961 | -1.182986 |
| 50            | 6             | -4.011997               | 0.366073  | 0.710281  |
| 51            | 6             | -2.704738               | 1.338681  | -1.229417 |
| 52            | 6             | -4.609766               | -0.820175 | -1.933371 |
| 53            | 1             | -2.491361               | -1.347357 | -1.894410 |
| 54            | 1             | -3.419502               | -1.998336 | -0.538662 |
| 55            | 6             | -5.338009               | 0.666921  | -0.035876 |

|    |   |           |           |           |
|----|---|-----------|-----------|-----------|
| 56 | 1 | -4.137792 | -0.506087 | 1.366999  |
| 57 | 1 | -3.762869 | 1.225265  | 1.343597  |
| 58 | 6 | -4.031824 | 1.637141  | -1.970322 |
| 59 | 1 | -2.404041 | 2.204193  | -0.626398 |
| 60 | 1 | -1.898435 | 1.139999  | -1.944950 |
| 61 | 6 | -4.422423 | 0.419246  | -2.841796 |
| 62 | 6 | -5.735529 | -0.545941 | -0.909091 |
| 63 | 1 | -4.872689 | -1.691438 | -2.548613 |
| 64 | 6 | -5.151092 | 1.912474  | -0.936805 |
| 65 | 1 | -6.123951 | 0.862930  | 0.706389  |
| 66 | 1 | -3.894332 | 2.520136  | -2.609319 |
| 67 | 1 | -5.351801 | 0.628568  | -3.389871 |
| 68 | 1 | -3.640217 | 0.224294  | -3.587936 |
| 69 | 1 | -6.682307 | -0.341889 | -1.428174 |
| 70 | 1 | -5.896266 | -1.431047 | -0.277072 |
| 71 | 1 | -6.093146 | 2.146360  | -1.451876 |
| 72 | 1 | -4.891960 | 2.787441  | -0.323499 |
| 73 | 6 | 2.655624  | 0.794706  | -0.346317 |
| 74 | 6 | 3.636007  | 1.339052  | 0.739071  |
| 75 | 6 | 3.186917  | -0.603912 | -0.763178 |
| 76 | 6 | 2.715882  | 1.682398  | -1.628676 |
| 77 | 6 | 5.076818  | 1.445663  | 0.177120  |
| 78 | 1 | 3.318533  | 2.318301  | 1.105207  |
| 79 | 1 | 3.616010  | 0.656710  | 1.599758  |
| 80 | 6 | 4.637625  | -0.536079 | -1.304955 |
| 81 | 1 | 3.159123  | -1.264126 | 0.102604  |
| 82 | 1 | 2.536051  | -1.026412 | -1.531661 |
| 83 | 6 | 4.168506  | 1.774069  | -2.164766 |
| 84 | 1 | 2.052629  | 1.242911  | -2.384319 |
| 85 | 1 | 2.361305  | 2.693833  | -1.430383 |
| 86 | 6 | 5.085079  | 2.369199  | -1.066640 |
| 87 | 6 | 5.579601  | 0.039931  | -0.223347 |
| 88 | 1 | 5.730954  | 1.867164  | 0.952875  |
| 89 | 6 | 4.675618  | 0.368755  | -2.556851 |
| 90 | 1 | 4.958031  | -1.552582 | -1.573015 |
| 91 | 1 | 4.177190  | 2.430400  | -3.045820 |
| 92 | 1 | 6.110408  | 2.472957  | -1.448061 |
| 93 | 1 | 4.740111  | 3.376663  | -0.791619 |
| 94 | 1 | 6.607742  | 0.097988  | -0.607275 |
| 95 | 1 | 5.598958  | -0.618064 | 0.657066  |
| 96 | 1 | 5.699159  | 0.428740  | -2.952734 |
| 97 | 1 | 4.042494  | -0.053539 | -3.349039 |

$18^{1-Ad}$  (E = -1156.3621902 a.u.)

| Center Number | Atomic Number | Coordinates (Angstroms) |           |           |
|---------------|---------------|-------------------------|-----------|-----------|
|               |               | X                       | Y         | Z         |
| 1             | 22            | -0.218821               | -0.037681 | -0.398422 |
| 2             | 7             | -0.753621               | 1.563763  | -0.264842 |
| 3             | 6             | -1.921453               | -1.031960 | 0.907801  |
| 4             | 6             | -0.725704               | -1.050376 | 1.683824  |
| 5             | 6             | -1.736459               | -1.918269 | -0.190872 |
| 6             | 17            | 0.048800                | -0.453530 | -2.720849 |
| 7             | 6             | 0.169283                | -2.000453 | 1.091942  |
| 8             | 6             | -0.451634               | -2.530902 | -0.064617 |
| 9             | 6             | -0.526880               | -0.365099 | 3.015569  |
| 10            | 6             | -3.207715               | -0.336179 | 1.277796  |
| 11            | 6             | -2.759287               | -2.261864 | -1.245474 |
| 12            | 6             | 0.091610                | -3.590316 | -0.989280 |
| 13            | 6             | 1.487567                | -2.439313 | 1.680449  |
| 14            | 1             | -0.880911               | -1.001393 | 3.839968  |
| 15            | 1             | -1.077105               | 0.579632  | 3.067316  |
| 16            | 1             | 0.529332                | -0.146101 | 3.208712  |
| 17            | 1             | -3.826359               | -0.988288 | 1.911888  |
| 18            | 1             | -3.798698               | -0.078311 | 0.393701  |
| 19            | 1             | -3.021817               | 0.588163  | 1.831801  |

|    |   |           |           |           |
|----|---|-----------|-----------|-----------|
| 20 | 1 | -3.315081 | -3.168334 | -0.963615 |
| 21 | 1 | -2.285324 | -2.445999 | -2.214377 |
| 22 | 1 | -3.488186 | -1.456455 | -1.380951 |
| 23 | 1 | -0.464918 | -4.531412 | -0.876695 |
| 24 | 1 | 1.144909  | -3.806128 | -0.781590 |
| 25 | 1 | 0.013427  | -3.279901 | -2.037610 |
| 26 | 1 | 1.332396  | -3.245781 | 2.411184  |
| 27 | 1 | 1.995378  | -1.621701 | 2.203071  |
| 28 | 1 | 2.171862  | -2.820299 | 0.915336  |
| 29 | 7 | 1.920026  | 0.329738  | 0.029270  |
| 30 | 6 | 2.888054  | -0.287749 | -0.687645 |
| 31 | 6 | 2.294467  | 1.214691  | 0.983107  |
| 32 | 6 | 4.246468  | -0.048200 | -0.475417 |
| 33 | 1 | 2.548096  | -0.970233 | -1.456942 |
| 34 | 6 | 3.631640  | 1.498748  | 1.260005  |
| 35 | 1 | 1.489737  | 1.707323  | 1.513555  |
| 36 | 6 | 4.629458  | 0.857919  | 0.517945  |
| 37 | 1 | 4.982394  | -0.561975 | -1.082014 |
| 38 | 1 | 3.879723  | 2.214803  | 2.034239  |
| 39 | 1 | 5.677386  | 1.063870  | 0.705415  |
| 40 | 6 | -1.282673 | 2.907071  | -0.241812 |
| 41 | 6 | -1.433003 | 3.439617  | 1.215081  |
| 42 | 6 | -0.318809 | 3.859575  | -1.015936 |
| 43 | 6 | -2.678608 | 2.957690  | -0.934388 |
| 44 | 6 | -1.985421 | 4.886685  | 1.211252  |
| 45 | 1 | -2.106404 | 2.776051  | 1.773644  |
| 46 | 1 | -0.452881 | 3.407626  | 1.711883  |
| 47 | 6 | -0.870024 | 5.306310  | -1.019883 |
| 48 | 1 | 0.671369  | 3.827818  | -0.540985 |
| 49 | 1 | -0.202905 | 3.484503  | -2.040350 |
| 50 | 6 | -3.231027 | 4.404211  | -0.937757 |
| 51 | 1 | -2.576357 | 2.579704  | -1.959644 |
| 52 | 1 | -3.366091 | 2.287483  | -0.402440 |
| 53 | 6 | -3.371778 | 4.907026  | 0.520612  |
| 54 | 6 | -1.011481 | 5.809839  | 0.437943  |
| 55 | 1 | -2.084726 | 5.240422  | 2.247034  |
| 56 | 6 | -2.256706 | 5.328216  | -1.709250 |
| 57 | 1 | -0.175669 | 5.957453  | -1.568861 |
| 58 | 1 | -4.214552 | 4.415161  | -1.427474 |
| 59 | 1 | -3.781209 | 5.926970  | 0.530239  |
| 60 | 1 | -4.076988 | 4.269559  | 1.072689  |
| 61 | 1 | -1.386503 | 6.842957  | 0.445973  |
| 62 | 1 | -0.028692 | 5.818226  | 0.930918  |
| 63 | 1 | -2.649475 | 6.354563  | -1.733186 |
| 64 | 1 | -2.164032 | 4.991027  | -2.750975 |

**17<sup>1-Ad</sup>** (E = -755.667076 a.u.)

| Center Number | Atomic Number | Coordinates (Angstroms) |           |           |
|---------------|---------------|-------------------------|-----------|-----------|
|               |               | X                       | Y         | Z         |
| 1             | 7             | 1.249133                | 0.708974  | 0.069182  |
| 2             | 6             | 0.060997                | 0.263766  | 0.105792  |
| 3             | 6             | -1.117243               | 1.195434  | 0.151040  |
| 4             | 6             | -2.321304               | 0.374760  | 0.338151  |
| 5             | 6             | -0.518361               | -1.154909 | 0.156711  |
| 6             | 6             | -2.000525               | -0.937157 | 0.356943  |
| 7             | 1             | -0.329579               | -1.694775 | -0.778114 |
| 8             | 1             | -0.076366               | -1.756771 | 0.957478  |
| 9             | 6             | -2.908848               | -2.121888 | 0.522644  |
| 10            | 6             | -3.685590               | 0.995194  | 0.476451  |
| 11            | 1             | -4.468079               | 0.245196  | 0.619548  |
| 12            | 1             | -3.938424               | 1.581850  | -0.416946 |
| 13            | 1             | -3.714917               | 1.683760  | 1.331396  |
| 14            | 1             | -3.955928               | -1.833982 | 0.650660  |
| 15            | 1             | -2.611809               | -2.719273 | 1.396437  |
| 16            | 1             | -2.843823               | -2.786706 | -0.350641 |

|    |   |           |           |           |
|----|---|-----------|-----------|-----------|
| 17 | 6 | -1.044467 | 2.529572  | 0.036809  |
| 18 | 1 | -1.926406 | 3.157544  | 0.079866  |
| 19 | 1 | -0.083270 | 3.009001  | -0.102482 |
| 20 | 6 | 2.488134  | -0.100445 | 0.069081  |
| 21 | 6 | 2.531622  | -1.233552 | -0.996165 |
| 22 | 6 | 3.643115  | 0.895295  | -0.239824 |
| 23 | 6 | 2.742179  | -0.711567 | 1.479073  |
| 24 | 6 | 3.908210  | -1.947515 | -0.961382 |
| 25 | 1 | 1.746769  | -1.973448 | -0.808107 |
| 26 | 1 | 2.348198  | -0.802129 | -1.990050 |
| 27 | 6 | 5.016793  | 0.188577  | -0.204479 |
| 28 | 1 | 3.465781  | 1.345084  | -1.226153 |
| 29 | 1 | 3.606160  | 1.708829  | 0.496016  |
| 30 | 6 | 4.112985  | -1.434015 | 1.508638  |
| 31 | 1 | 2.716609  | 0.092527  | 2.226318  |
| 32 | 1 | 1.942948  | -1.419759 | 1.732785  |
| 33 | 6 | 4.128657  | -2.559649 | 0.444738  |
| 34 | 6 | 5.038636  | -0.936516 | -1.266933 |
| 35 | 1 | 3.913235  | -2.746613 | -1.715209 |
| 36 | 6 | 5.242768  | -0.421013 | 1.200975  |
| 37 | 1 | 5.807999  | 0.918723  | -0.421724 |
| 38 | 1 | 4.266860  | -1.867326 | 2.506284  |
| 39 | 1 | 5.089017  | -3.092453 | 0.476191  |
| 40 | 1 | 3.342835  | -3.297300 | 0.662906  |
| 41 | 1 | 6.011692  | -1.447178 | -1.260385 |
| 42 | 1 | 4.902621  | -0.510184 | -2.270660 |
| 43 | 1 | 6.219246  | -0.923311 | 1.243564  |
| 44 | 1 | 5.253126  | 0.373925  | 1.959507  |

**tBuNC** (E = -250.6583893 a.u.)

| Center Number | Atomic Number | Coordinates (Angstroms) |           |           |
|---------------|---------------|-------------------------|-----------|-----------|
|               |               | X                       | Y         | Z         |
| 1             | 6             | 0.737505                | -0.430693 | 1.404646  |
| 2             | 6             | 0.263125                | -0.000022 | 0.000011  |
| 3             | 1             | 0.375421                | 0.266012  | 2.166704  |
| 4             | 1             | 0.374586                | -1.434410 | 1.645664  |
| 5             | 1             | 1.831820                | -0.439411 | 1.431318  |
| 6             | 6             | 0.736938                | -1.001115 | -1.075554 |
| 7             | 6             | 0.737059                | 1.431851  | -0.329658 |
| 8             | 1             | 0.373669                | -0.707783 | -2.065118 |
| 9             | 1             | 1.831264                | -1.019829 | -1.096823 |
| 10            | 1             | 0.374878                | -2.009443 | -0.853247 |
| 11            | 1             | 1.831374                | 1.459241  | -0.336595 |
| 12            | 1             | 0.373986                | 1.743484  | -1.313691 |
| 13            | 1             | 0.374919                | 2.142414  | 0.419470  |
| 14            | 7             | -1.198682               | -0.000043 | 0.000457  |
| 15            | 6             | -2.367404               | 0.000005  | 0.000691  |

**MeNC** (E = -132.7370076 a.u.)

| Center Number | Atomic Number | Coordinates (Angstroms) |           |           |
|---------------|---------------|-------------------------|-----------|-----------|
|               |               | X                       | Y         | Z         |
| 1             | 7             | 0.318638                | 0.000007  | 0.464006  |
| 2             | 6             | 1.486403                | -0.000005 | 0.463974  |
| 3             | 6             | -1.116184               | 0.000000  | 0.463782  |
| 4             | 1             | -1.483851               | 0.930378  | 0.862416  |
| 5             | 1             | -1.483826               | -0.844873 | -0.556668 |
| 6             | 1             | -1.484098               | -0.085526 | 1.085397  |

**EtNC** (E = -172.0442071 a.u.)

| Center Number | Atomic Number | Coordinates (Angstroms) |           |           |
|---------------|---------------|-------------------------|-----------|-----------|
|               |               | X                       | Y         | Z         |
| 1             | 7             | 0.308823                | 0.020652  | -0.009177 |
| 2             | 6             | 1.477067                | 0.032425  | -0.014352 |
| 3             | 6             | -1.134586               | -0.016348 | 0.007225  |
| 4             | 1             | -1.482227               | 0.839779  | 0.593959  |
| 5             | 1             | -1.482143               | 0.120335  | -1.021650 |

|   |   |           |           |          |
|---|---|-----------|-----------|----------|
| 6 | 6 | -1.662525 | -1.332305 | 0.593204 |
| 7 | 1 | -1.322787 | -1.464168 | 1.624684 |
| 8 | 1 | -2.756964 | -1.318581 | 0.587035 |
| 9 | 1 | -1.322701 | -2.187143 | 0.001147 |

**ArNC** (E = -403.0543015 a.u.)

| Center Number | Atomic Number | Coordinates (Angstroms) |           |           |
|---------------|---------------|-------------------------|-----------|-----------|
|               |               | X                       | Y         | Z         |
| 1             | 7             | 0.229094                | -0.000343 | -0.000107 |
| 2             | 6             | 1.401398                | -0.000401 | -0.000233 |
| 3             | 6             | -1.167283               | -0.000261 | -0.000031 |
| 4             | 6             | -1.843059               | 0.086721  | 1.237835  |
| 5             | 6             | -1.843156               | -0.087166 | -1.237836 |
| 6             | 6             | -3.244288               | 0.084845  | 1.210076  |
| 7             | 6             | -3.244395               | -0.085135 | -1.209977 |
| 8             | 6             | -3.939639               | -0.000107 | 0.000074  |
| 9             | 1             | -3.788608               | 0.150639  | 2.146375  |
| 10            | 1             | -3.788803               | -0.150867 | -2.146231 |
| 11            | 1             | -5.024663               | -0.000046 | 0.000123  |
| 12            | 6             | -1.078717               | 0.177807  | 2.535320  |
| 13            | 1             | -0.430330               | -0.694774 | 2.681748  |
| 14            | 1             | -0.430153               | 1.062159  | 2.558308  |
| 15            | 1             | -1.764396               | 0.237527  | 3.384370  |
| 16            | 6             | -1.078890               | -0.178339 | -2.535364 |
| 17            | 1             | -0.430390               | 0.694155  | -2.681804 |
| 18            | 1             | -0.430440               | -1.062772 | -2.558382 |
| 19            | 1             | -1.764588               | -0.237962 | -3.384397 |

**1-AdNC** (E = -482.8664564 a.u.)

| Center Number | Atomic Number | Coordinates (Angstroms) |           |           |
|---------------|---------------|-------------------------|-----------|-----------|
|               |               | X                       | Y         | Z         |
| 1             | 7             | 0.257579                | -0.027219 | -0.056585 |
| 2             | 6             | 1.424721                | -0.039054 | -0.123086 |
| 3             | 6             | -1.188684               | -0.011404 | 0.026632  |
| 4             | 6             | -1.773992               | -1.022005 | -0.997342 |
| 5             | 6             | -1.625317               | -0.412173 | 1.462197  |
| 6             | 6             | -1.706951               | 1.416857  | -0.295807 |
| 7             | 6             | -3.319755               | -1.001584 | -0.904722 |
| 8             | 1             | -1.442956               | -0.748718 | -2.006900 |
| 9             | 1             | -1.386537               | -2.024985 | -0.779391 |
| 10            | 6             | -3.171607               | -0.394231 | 1.546972  |
| 11            | 1             | -1.236575               | -1.411453 | 1.694036  |
| 12            | 1             | -1.189981               | 0.290549  | 2.183433  |
| 13            | 6             | -3.252986               | 1.429068  | -0.205253 |
| 14            | 1             | -1.271946               | 2.129810  | 0.415482  |
| 15            | 1             | -1.375794               | 1.704792  | -1.301260 |
| 16            | 6             | -3.838432               | 0.422149  | -1.226611 |
| 17            | 6             | -3.757177               | -1.401859 | 0.526360  |
| 18            | 1             | -3.726547               | -1.717205 | -1.630480 |
| 19            | 6             | -3.690577               | 1.029646  | 1.226000  |
| 20            | 1             | -3.473143               | -0.678343 | 2.563176  |
| 21            | 1             | -3.612239               | 2.440429  | -0.434192 |
| 22            | 1             | -4.935556               | 0.439815  | -1.183228 |
| 23            | 1             | -3.549662               | 0.707826  | -2.247358 |
| 24            | 1             | -4.853169               | -1.409952 | 0.594627  |
| 25            | 1             | -3.410494               | -2.418458 | 0.757217  |
| 26            | 1             | -4.785667               | 1.055569  | 1.303764  |
| 27            | 1             | -3.296664               | 1.749442  | 1.956541  |

**Pyridine** (E = -248.2546674 a.u.)

| Center Number | Atomic Number | Coordinates (Angstroms) |   |   |
|---------------|---------------|-------------------------|---|---|
|               |               | X                       | Y | Z |

---

|    |   |           |           |           |
|----|---|-----------|-----------|-----------|
| 1  | 6 | -1.149804 | -0.722726 | -0.000195 |
| 2  | 6 | -1.201845 | 0.675263  | -0.000127 |
| 3  | 6 | 0.000234  | 1.389949  | 0.000097  |
| 4  | 6 | 1.202071  | 0.674860  | 0.000208  |
| 5  | 6 | 1.149561  | -0.723113 | 0.000086  |
| 6  | 7 | -0.000241 | -1.427760 | -0.000089 |
| 7  | 1 | 0.000410  | 2.474941  | 0.000168  |
| 8  | 1 | -2.064633 | -1.307919 | -0.000368 |
| 9  | 1 | -2.158930 | 1.184850  | -0.000233 |
| 10 | 1 | 2.159332  | 1.184115  | 0.000383  |
| 11 | 1 | 2.064191  | -1.308614 | 0.000202  |
